# Supplementary material for: Selective deuteroreduction of alkynes by Zn/Mn with nickel catalysis under mechanical conditions
Source: Royal Society of Chemistry journal article supplement (doi:10.1039/d5gc05935f), 2026-01-01
Supplement: d5gc05935f1.pdf [file d5gc05935f1.pdf]

## Supporting Information

### Selective Deuteroreduction of Alkynes by Zn/Mn with Nickel Catalysis under Mechanical Conditions

Xuejie Yang<sup>1</sup>, Chong Zu<sup>1</sup>, Tingrui Liu<sup>1</sup>, Zixian Yang<sup>1</sup>, Jiegong Deng<sup>1</sup>, Yufei Han,<sup>2</sup> Wu Li\*,<sup>3</sup> and Bingnan Du\*,<sup>1</sup>

<sup>1</sup>State Key Laboratory of Microbial Technology, School of Food Science and Pharmaceutical Engineering, Nanjing Normal University, Nanjing 210046, China.

<sup>2</sup>Department of Radiopharmaceuticals, School of Pharmacy, Nanjing Medical University, Nanjing 211166, China.

<sup>3</sup>College of Chemistry and Molecular Sciences, Wuhan University, Wuhan 430072, China.

## Table of Contents

|                                                   |           |
|---------------------------------------------------|-----------|
| <b>1. General Information.....</b>                | <b>3</b>  |
| <b>2. Optimization of Reaction Condition.....</b> | <b>4</b>  |
| <b>3. Solvent Compare Experiments.....</b>        | <b>11</b> |
| <b>4. Synthesis of Substrate.....</b>             | <b>13</b> |
| <b>5. Mechanistic Studies.....</b>                | <b>17</b> |
| <b>6. Characterization Data.....</b>              | <b>30</b> |
| <b>7. Copies of NMR Spectra.....</b>              | <b>61</b> |

## 1. General Information

Unless otherwise stated, all reagents were purchased from commercial sources, used without further purification. All solvents were purchased in their anhydrous form or dried over activated 4Å molecular sieves. Deuterium oxide (99.8% D, designated for NMR applications), nickel(II) chloride ethylene glycol dimethyl ether complex (98% purity), Zn and Mn reducing agents were used without prior drying, though they were stored in a desiccator. Prior to the experiment, all glassware was subjected to a drying procedure in a horizontal drying oven at 120 °C for 2 hours.

Ball milling was carried out using a Retsch MM 400 mixer mill. Unless otherwise stated, mechanochemical reactions were conducted in 5 mL stainless-steel jars with stainless-steel balls (10 mm in diameter). The stainless-steel jar and grinding ball were rigorously dried before use. Subsequent to the ball milling reaction, the post-treatment protocol entailed filtration through disposable short-type glass Pasteur pipettes (WITEG). These pipettes were preloaded with cotton and 200-300 mesh silica gel powder. A binary solvent system composed of ethyl acetate and petroleum ether in a 1:1 volumetric ratio (PE:EA = 1:1) was employed as the eluent during filtration.

Nuclear magnetic resonance (NMR) spectra for  $^1\text{H}$  and  $^{13}\text{C}$  were acquired using a Bruker Avance 400 spectrometer. Chemical shifts ( $\delta$ ) are presented in parts per million (ppm), referenced to the residual solvent peaks. Coupling constants (J) are reported in hertz (Hz). High-resolution mass spectrometry (HRMS) analyses were performed on Agilent Technologies 6545 Q-TOF LC/MS system equipped with an ESI ion Source. Gas chromatography (GC) analyses were conducted on a SHIMADZU GC-2030AF gas chromatograph equipped with an Agilent DB-5MS capillary column (30 m in length, 0.25 mm internal diameter, and 0.25  $\mu\text{m}$  film thickness). Gas chromatography-mass spectrometry (GC-MS) analyses were performed using a SHIMADAZU GC-MS QP2010 Plus instrument, equipped with an Agilent HP-5MS capillary column (30 m  $\times$  0.25 mm  $\times$  0.25  $\mu\text{m}$ ). X-ray powder diffraction (XRD) was performed for alloy testing using a Rigaku Mini Flex 600 instrument.

### 1.1 Equipment used in this Study

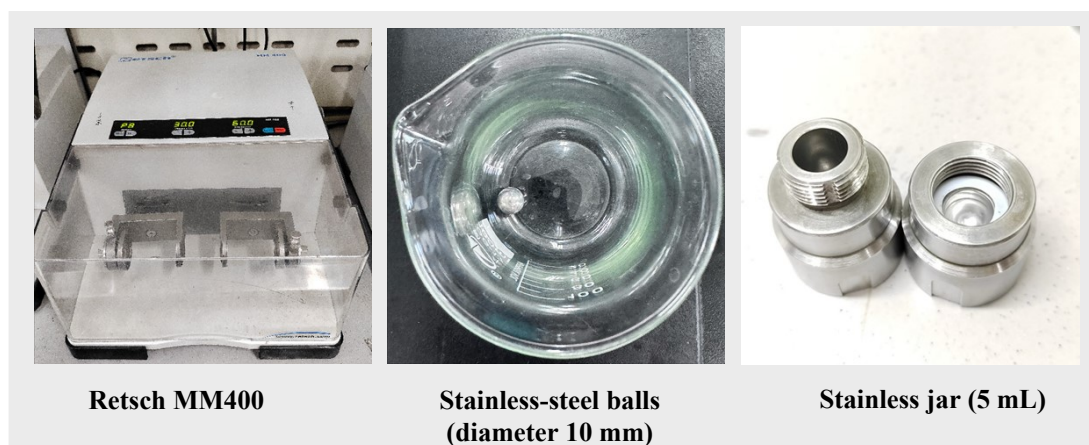

Figure S1: Equipment used in this study

## 2. Optimization of Reaction Condition

### 2.1 General procedure for semi-deuteration conditions (Zn)

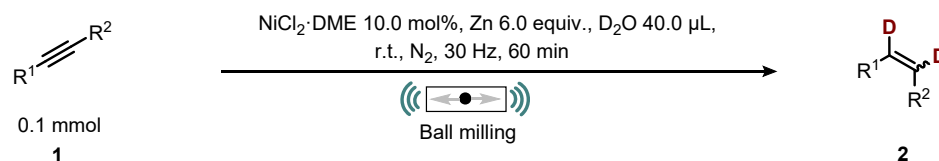

Zn (39.2 mg, 6.0 equiv.) and nickel(II) chloride ethylene glycol dimethyl ether complex (NiCl<sub>2</sub>·DME, 2.2 mg, 10.0 mol%) were introduced into a 5 mL stainless-steel ball milling jar. Subsequently, the jar was transferred into a glovebox purged with nitrogen. Then, 0.1 mmol of the alkyne substrate and 40 μL of deuterium oxide (D<sub>2</sub>O) were added to the stainless-steel ball milling jar. The jar was sealed and then placed into a Retsch MM400 mixer mill, where it was milled at a frequency of 30 Hz for 60 minutes. Upon completion of the ball milling operation, the reaction mixture was diluted with a binary solvent system composed of ethyl acetate and petroleum ether at a volume ratio of 1:1 (PE:EA = 1:1). Subsequently, the mixture was filtered through a disposable WITEG short-type glass Pasteur pipette pre-packed with cotton and 200-300 mesh silica gel powder, using the aforementioned ethyl acetate/petroleum ether mixture (PE:EA = 1:1) as the eluent. The resulting filtrate was thoroughly concentrated under reduced pressure. The residue was further purified via silica gel column chromatography to yield the desired semi-deuteration products. Deuterium incorporation was determined by <sup>1</sup>H NMR spectroscopy.

### 2.2 General procedure for tetra-deuteration conditions (Mn)

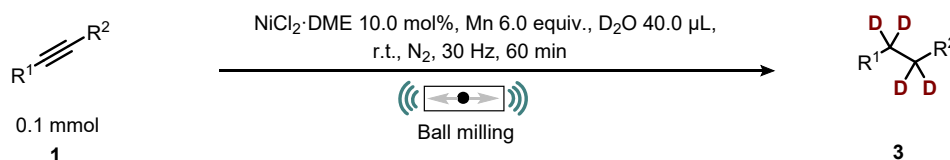

Mn (32.9 mg, 6.0 equiv.) and nickel(II) chloride ethylene glycol dimethyl ether complex (NiCl<sub>2</sub>·DME, 2.2 mg, 10.0 mol%) were introduced into a 5 mL stainless-steel ball milling jar. Subsequently, the jar was transferred into a glovebox purged with nitrogen. Then, 0.1 mmol of the alkyne substrate and 40 μL of deuterium oxide (D<sub>2</sub>O) were added to the stainless-steel ball milling jar. The jar was sealed and then placed into a Retsch MM400 mixer mill, where it was milled at a frequency of 30 Hz for 60 minutes. Upon completion of the ball milling operation, the reaction mixture was diluted with a binary solvent system composed of ethyl acetate and petroleum ether at a volume ratio of 1:1 (PE:EA = 1:1). Subsequently, the mixture was filtered through a disposable WITEG short-type glass Pasteur pipette pre-packed with cotton and 200-300 mesh silica gel powder, using the aforementioned ethyl acetate/petroleum ether mixture (PE:EA = 1:1) as the eluent. The resulting filtrate was thoroughly concentrated under reduced pressure. The residue was further purified via silica gel column chromatography to yield the desired tetra-deuteration products. Deuterium incorporation was determined by <sup>1</sup>H NMR spectroscopy.

### 2.3 Condition optimization

Table S1. Optimization of catalyst ligands under semi-deuteration conditions (Zn) / tetra-

### deuteration conditions (Mn)

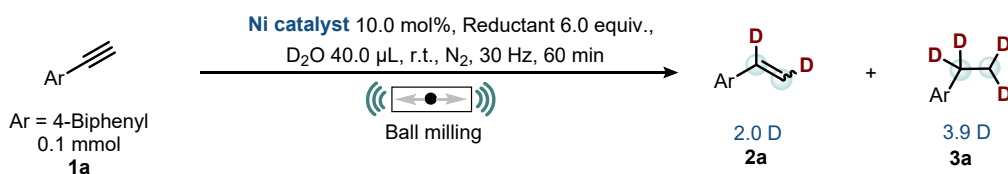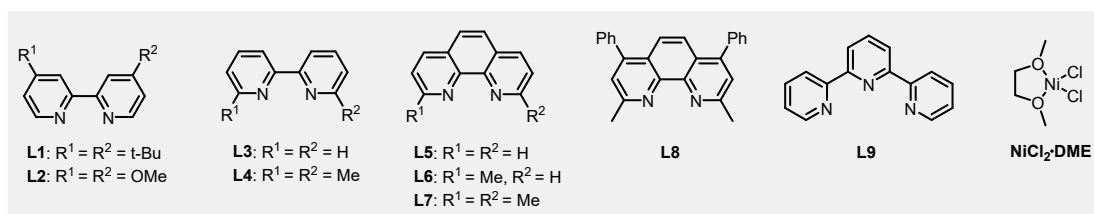

| Entry | Reductant | Ni catalyst            | Ligands   | Yield <sup>[a]</sup> 2a | Yield <sup>[a]</sup> 3a |
|-------|-----------|------------------------|-----------|-------------------------|-------------------------|
| 1     | Zn        | NiCl <sub>2</sub> ·DME | /         | 89%                     | Trace                   |
| 2     | Mn        | NiI <sub>2</sub>       | <b>L1</b> | 12%                     | N.D.                    |
| 3     | Mn        | NiBr <sub>2</sub>      | <b>L1</b> | 43%                     | 6%                      |
| 4     | Mn        | NiCl <sub>2</sub>      | <b>L1</b> | 52%                     | 16%                     |
| 5     | Mn        | NiCl <sub>2</sub>      | <b>L2</b> | 41%                     | 5%                      |
| 6     | Mn        | NiCl <sub>2</sub>      | <b>L3</b> | N.D.                    | N.D.                    |
| 7     | Mn        | NiCl <sub>2</sub>      | <b>L4</b> | 5%                      | 67%                     |
| 8     | Mn        | NiCl <sub>2</sub>      | <b>L5</b> | 19%                     | N.D.                    |
| 9     | Mn        | NiCl <sub>2</sub>      | <b>L6</b> | 45%                     | 9%                      |
| 10    | Mn        | NiCl <sub>2</sub>      | <b>L7</b> | 51%                     | 12%                     |
| 11    | Mn        | NiCl <sub>2</sub>      | <b>L8</b> | N.D.                    | 3%                      |
| 12    | Mn        | NiCl <sub>2</sub>      | <b>L9</b> | N.D.                    | N.D.                    |
| 13    | Mn        | NiCl <sub>2</sub> ·DME | /         | N.D.                    | 97%                     |

[a] GC yield was determined using *n*-dodecane as an internal standard.

**Table S2. Optimization of catalyst under tetra-deuteration conditions (Mn)**

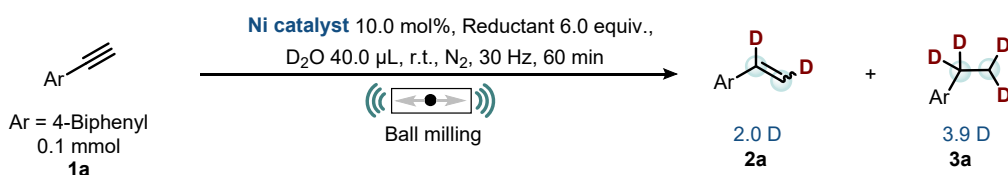

| Entry | Reductant | Ni catalyst            | Yield <sup>[a]</sup> 2a | Yield <sup>[a]</sup> 3a |
|-------|-----------|------------------------|-------------------------|-------------------------|
| 1     | Mn        | NiF <sub>2</sub>       | 4%                      | 71%                     |
| 2     | Mn        | NiI <sub>2</sub>       | Trace                   | 58%                     |
| 3     | Mn        | NiBr <sub>2</sub>      | 2%                      | 52%                     |
| 4     | Mn        | NiCl <sub>2</sub>      | 2%                      | 55%                     |
| 5     | Mn        | Ni(OAc) <sub>2</sub>   | 3%                      | 61%                     |
| 6     | Mn        | Ni(acac) <sub>2</sub>  | 16%                     | 29%                     |
| 7     | Mn        | NiCl <sub>2</sub> ·DME | N.D.                    | 97%                     |
| 8     | Zn        | NiCl <sub>2</sub> ·DME | 89%                     | N.D.                    |

**Table S3. Optimization of catalyst content under tetra-deuteration conditions (Mn)**

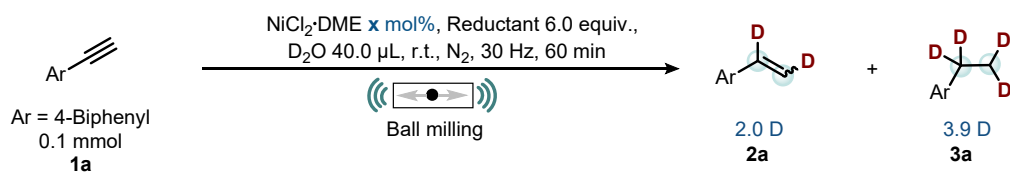

| Entry | Reductant | Ni catalyst | Yield <sup>[a]</sup> 2a | Yield <sup>[a]</sup> 3a |
|-------|-----------|-------------|-------------------------|-------------------------|
| 1     | Mn        | 5 mol%      | 4%                      | 71%                     |
| 2     | Mn        | 10 mol%     | N.D.                    | 97%                     |
| 3     | Mn        | 20 mol%     | N.D.                    | 89%                     |
| 4     | Mn        | 30 mol%     | 2%                      | 83%                     |
| 5     | Zn        | 5 mol%      | 81%                     | N.D.                    |
| 6     | Zn        | 10 mol%     | 89%                     | Trace                   |
| 7     | Zn        | 20 mol%     | 70%                     | 8%                      |

[a] GC yield was determined using *n*-dodecane as an internal standard.

**Table S4. Optimization of the piezoelectric material under semi-deuteration conditions (Zn) / tetra-deuteration conditions (Mn)**

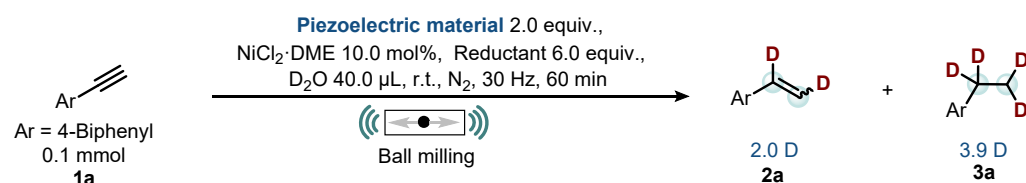

| Entry | Reductant | Piezoelectric material           | Yield <sup>[a]</sup> 2a | Yield <sup>[a]</sup> 3a |
|-------|-----------|----------------------------------|-------------------------|-------------------------|
| 1     | Zn        | ZnO                              | 86%                     | N.D.                    |
| 2     | Zn        | BaTiO <sub>3</sub>               | 84%                     | N.D.                    |
| 3     | Zn        | MgTiO <sub>3</sub>               | 14%                     | Trace                   |
| 4     | Zn        | SrTiO <sub>3</sub>               | 60%                     | Trace                   |
| 5     | Zn        | CaTiO <sub>3</sub>               | 51%                     | Trace                   |
| 6     | Zn        | AlN                              | 44%                     | Trace                   |
| 7     | Zn        | PbZrO <sub>3</sub>               | 6%                      | N.D.                    |
| 8     | Zn        | ZnS                              | 82%                     | Trace                   |
| 9     | Zn        | Li <sub>2</sub> TiO <sub>3</sub> | 44%                     | Trace                   |
| 10    | Zn        | LiNbO <sub>3</sub>               | 50%                     | Trace                   |
| 11    | Zn        | /                                | 89%                     | Trace                   |
| 12    | /         | ZnO                              | N.D.                    | N.D.                    |
| 13    | /         | BaTiO <sub>3</sub>               | N.D.                    | N.D.                    |
| 14    | Mn        | ZnO                              | N.D.                    | 93%                     |
| 15    | Mn        | BaTiO <sub>3</sub>               | Trace                   | 90%                     |
| 16    | Mn        | MgTiO <sub>3</sub>               | N.D.                    | 85%                     |
| 17    | Mn        | SrTiO <sub>3</sub>               | 2%                      | 84%                     |
| 18    | Mn        | CaTiO <sub>3</sub>               | 39%                     | 45%                     |
| 19    | Mn        | AlN                              | 64%                     | 9%                      |
| 20    | Mn        | PbZrO <sub>3</sub>               | 53%                     | 9%                      |

|    |    |                                  |      |     |
|----|----|----------------------------------|------|-----|
| 21 | Mn | ZnS                              | 59%  | 11% |
| 22 | Mn | Li <sub>2</sub> TiO <sub>3</sub> | 57%  | 13% |
| 23 | Mn | LiNbO <sub>3</sub>               | 64%  | 19% |
| 24 | Mn | /                                | N.D. | 97% |

[a] GC yield was determined using *n*-dodecane as an internal standard.

**Table S5. Optimization of frequency (Hz) under semi-deuteration conditions (Zn) / tetra-deuteration conditions (Mn)**

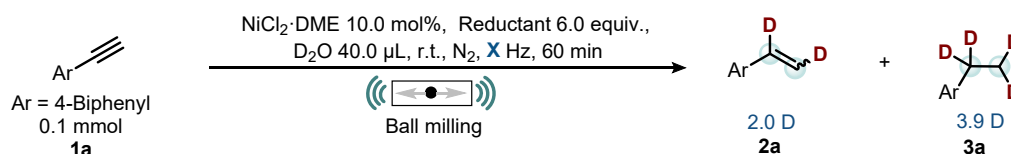

| Entry | Reductant | Frequency (Hz) | Yield <sup>[a]</sup> 2a | Yield <sup>[a]</sup> 3a |
|-------|-----------|----------------|-------------------------|-------------------------|
| 1     | Zn        | 5              | N.D.                    | N.D.                    |
| 2     | Zn        | 10             | 3%                      | N.D.                    |
| 3     | Zn        | 15             | 6%                      | N.D.                    |
| 4     | Zn        | 20             | 11%                     | Trace                   |
| 5     | Zn        | 25             | 50%                     | Trace                   |
| 6     | Zn        | 30             | 89%                     | Trace                   |
| 7     | Mn        | 5              | 5%                      | 2%                      |
| 8     | Mn        | 10             | 29%                     | 11%                     |
| 9     | Mn        | 15             | 53%                     | 17%                     |
| 10    | Mn        | 20             | 55%                     | 22%                     |
| 11    | Mn        | 25             | 7%                      | 83%                     |
| 12    | Mn        | 30             | N.D.                    | 97%                     |

[a] GC yield was determined using *n*-dodecane as an internal standard.

**Table S6. Optimization of reductant under semi-deuteration conditions (Zn) / tetra-deuteration conditions (Mn)**

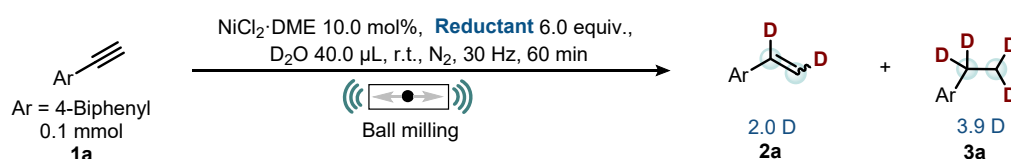

| Entry | Reductant | Yield <sup>[a]</sup> 2a | Yield <sup>[a]</sup> 3a |
|-------|-----------|-------------------------|-------------------------|
| 1     | Zn        | 89%                     | Trace                   |
| 2     | Fe        | N.D.                    | N.D.                    |
| 3     | Ga        | N.D.                    | N.D.                    |
| 4     | Mg        | N.D.                    | 58%                     |
| 5     | Mn        | N.D.                    | 97%                     |

[a] GC yield was determined using *n*-dodecane as an internal standard.

**Table S7. Optimization of reaction time under semi-deuteration conditions (Zn) / tetra-deuteration conditions (Mn)**

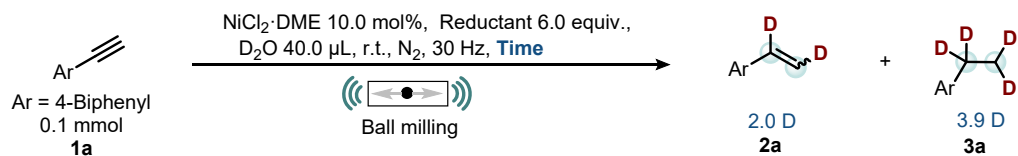

| Entry | Reductant | Reaction time (min) | Yield <sup>[a]</sup> 2a | Yield <sup>[a]</sup> 3a |
|-------|-----------|---------------------|-------------------------|-------------------------|
| 1     | Zn        | 10                  | 3%                      | N.D.                    |
| 2     | Zn        | 20                  | 18%                     | N.D.                    |
| 3     | Zn        | 30                  | 32%                     | N.D.                    |
| 4     | Zn        | 40                  | 44%                     | Trace                   |
| 5     | Zn        | 50                  | 73%                     | Trace                   |
| 6     | Zn        | 60                  | 89%                     | Trace                   |
| 7     | Zn        | 90                  | 89%                     | Trace                   |
| 8     | Zn        | 120                 | 87%                     | Trace                   |
| 9     | Mn        | 10                  | 31%                     | 6%                      |
| 10    | Mn        | 20                  | 42%                     | 8%                      |
| 11    | Mn        | 30                  | 41%                     | 27%                     |
| 12    | Mn        | 40                  | 31%                     | 41%                     |
| 13    | Mn        | 50                  | 2%                      | 88%                     |
| 14    | Mn        | 60                  | N.D.                    | 97%                     |

[a] GC yield was determined using *n*-dodecane as an internal standard.

**Table S8. Optimization of reductant form under semi-deuteration conditions (Zn) / tetra-deuteration conditions (Mn)**

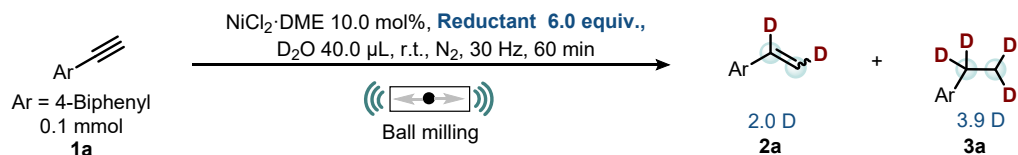

| Entry | Reductant forms      | Yield <sup>[a]</sup> 2a | Yield <sup>[a]</sup> 3a |
|-------|----------------------|-------------------------|-------------------------|
| 1     | Zn sheet             | 74%                     | N.D.                    |
| 2     | Zn wire              | 73%                     | N.D.                    |
| 3     | Zn powder (120 mesh) | 80%                     | Trace                   |
| 4     | Zn powder (800 mesh) | 89%                     | Trace                   |
| 5     | Without Reductant    | N.D.                    | N.D.                    |
| 6     | Mn block             | N.D.                    | 79%                     |
| 7     | Mn sheet             | N.D.                    | 75%                     |
| 8     | Mn powder (100 mesh) | Trace                   | 84%                     |
| 9     | Mn powder (325 mesh) | Trace                   | 97%                     |

[a] GC yield was determined using *n*-dodecane as an internal standard.

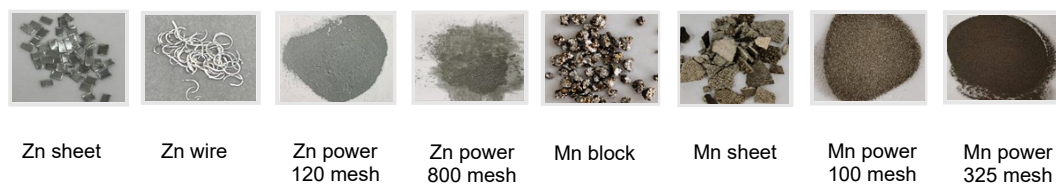

Figure S2: Different forms of reducing agents

Table S9. Comparison of air and nitrogen conditions under semi-deuteration conditions (Zn) / tetra-deuteration conditions (Mn)

$\text{Ar}-\text{C}\equiv\text{C}-\text{C}\equiv\text{C}-\text{Ar}$   
 Ar = 4-Biphenyl  
 0.1 mmol  
**1a**

$\xrightarrow[\text{Ball milling}]{\text{NiCl}_2\cdot\text{DME 10.0 mol\%, Reductant 6.0 equiv., D}_2\text{O 40.0 }\mu\text{L, r.t., N}_2/\text{Air, 30 Hz, 60 min}}$

$\text{Ar}-\text{C}(D)=\text{C}(D)-\text{Ar}$  (2.0 D **2a**) +  $\text{Ar}-\text{C}(D)(D)-\text{C}(D)(D)-\text{Ar}$  (3.9 D **3a**)

| Entry | Reductant | N <sub>2</sub> /Air | Yield <sup>[a]</sup> 2a | Yield <sup>[a]</sup> 3a | Yield <sup>[a]</sup> 1a |
|-------|-----------|---------------------|-------------------------|-------------------------|-------------------------|
| 1     | Zn        | N <sub>2</sub>      | 89%                     | Trace                   | Trace                   |
| 2     | Zn        | Air                 | 51%                     | N.D.                    | 40%                     |
| 3     | Mn        | N <sub>2</sub>      | N.D.                    | 97%                     | N.D.                    |
| 4     | Mn        | Air                 | 54%                     | 7%                      | 26%                     |

[a] GC yield was determined using *n*-dodecane as an internal standard.

Table S10. Optimization of reducing agent content under semi-deuteration conditions (Zn) / tetra-deuteration conditions (Mn)

$\text{Ar}-\text{C}\equiv\text{C}-\text{C}\equiv\text{C}-\text{Ar}$   
 Ar = 4-Biphenyl  
 0.1 mmol  
**1a**

$\xrightarrow[\text{Ball milling}]{\text{NiCl}_2\cdot\text{DME 10.0 mol\%, Reductant X equiv., D}_2\text{O 40.0 }\mu\text{L, r.t., N}_2, 30 \text{ Hz, 60 min}}$

$\text{Ar}-\text{C}(D)=\text{C}(D)-\text{Ar}$  (2.0 D **2a**) +  $\text{Ar}-\text{C}(D)(D)-\text{C}(D)(D)-\text{Ar}$  (3.9 D **3a**)

| Entry | Reductant | Reductant X equiv. | Yield <sup>[a]</sup> 2a | Yield <sup>[a]</sup> 3a |
|-------|-----------|--------------------|-------------------------|-------------------------|
| 1     | Mn        | 4 equiv.           | 20%                     | 65%                     |
| 2     | Mn        | 5 equiv.           | Trace                   | 77%                     |
| 3     | Mn        | 6 equiv.           | N.D.                    | 97%                     |
| 4     | Mn        | 7 equiv.           | N.D.                    | 95%                     |
| 5     | Mn        | 8 equiv.           | N.D.                    | 98%                     |
| 6     | Zn        | 4 equiv.           | 47%                     | N.D.                    |
| 7     | Zn        | 5 equiv.           | 73%                     | Trace                   |
| 8     | Zn        | 6 equiv.           | 89%                     | Trace                   |
| 9     | Zn        | 7 equiv.           | 88%                     | Trace                   |
| 10    | Zn        | 8 equiv.           | 90%                     | Trace                   |

[a] GC yield was determined using *n*-dodecane as an internal standard.

### 2.3.1 Effect of milling jar materials on the reaction under semi-deuteration conditions (Zn) / tetra-deuteration conditions (Mn)

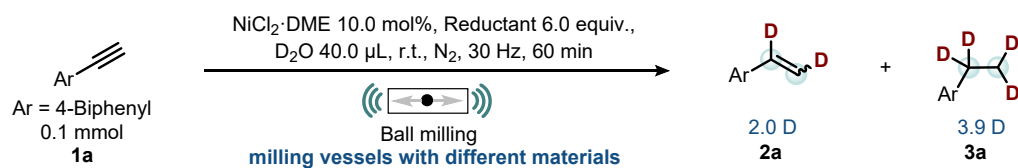

|                                  | Semi-deuteration conditions (Zn)                                                  |                                                                                   |                                                                                   | Tetra-deuteration conditions (Mn)                                                 |                                                                                     |                                                                                     |
|----------------------------------|-----------------------------------------------------------------------------------|-----------------------------------------------------------------------------------|-----------------------------------------------------------------------------------|-----------------------------------------------------------------------------------|-------------------------------------------------------------------------------------|-------------------------------------------------------------------------------------|
|                                  | Stainless-steel jar (5 mL)                                                        | Zirconia jar (5 mL)                                                               | Tungsten carbide jar (5mL)                                                        | Stainless-steel jar (5 mL)                                                        | Zirconia jar (5 mL)                                                                 | Tungsten carbide jar (5mL)                                                          |
|                                  |  |  |  |  |  |  |
|                                  | (diameter 10 mm)                                                                    | (diameter 10 mm)                                                                    |
| Yield <b>2a</b> <sup>[a]</sup> : | 89%                                                                               | 31%                                                                               | 71%                                                                               | N.D.                                                                              | 12%                                                                                 | 21%                                                                                 |
| Yield <b>3a</b> <sup>[a]</sup> : | Trace                                                                             | N.D.                                                                              | N.D.                                                                              | 97%                                                                               | 5%                                                                                  | 64%                                                                                 |

**Figure S3: Effect of milling jar materials on the reaction**

The experimental results clearly indicate that, under both semi-deuteration and tetra-deuteration conditions, zirconia milling media (balls and jars) afford poor reaction outcomes. In the semi-deuteration experiments, a tungsten carbide milling jar was able to give relatively moderate yields of **2a**. In the tetra-deuteration experiments, although the selectivity and yield in the tungsten carbide jar were reduced relative to those in the stainless-steel jar, the reaction was still promoted. Overall, the material of the milling jar and balls does affect the reaction. The effects of the milling jar material and composition, as well as the mass of the milling balls on the reaction, are also being further investigated in our ongoing studies.

### 3. Solvent Compare Experiments

**Table S11. Reactions in different solvents (under semi-deuteration conditions (Zn))**

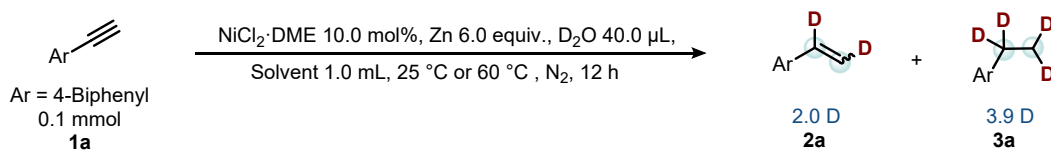

| Entry | Solvent            | Reductant | T(°C) | Yield <sup>[a]</sup> 2a | Yield <sup>[a]</sup> 3a |
|-------|--------------------|-----------|-------|-------------------------|-------------------------|
| 1     | THF                | Zn        | 25    | 5%                      | N.D.                    |
| 2     | Toluene            | Zn        | 25    | 11%                     | N.D.                    |
| 3     | DCM                | Zn        | 25    | 16%                     | N.D.                    |
| 4     | DMF                | Zn        | 25    | N.D.                    | N.D.                    |
| 5     | DMA                | Zn        | 25    | N.D.                    | N.D.                    |
| 6     | Xylenes            | Zn        | 25    | 12%                     | Trace                   |
| 7     | Dioxane            | Zn        | 25    | 6%                      | Trace                   |
| 8     | TFT                | Zn        | 25    | N.D.                    | N.D.                    |
| 9     | Benzene            | Zn        | 25    | 9%                      | N.D.                    |
| 10    | CH <sub>3</sub> CN | Zn        | 25    | N.D.                    | N.D.                    |
| 11    | DMSO               | Zn        | 25    | N.D.                    | N.D.                    |
| 12    | CHCl <sub>3</sub>  | Zn        | 25    | N.D.                    | N.D.                    |
| 13    | THF                | Zn        | 60    | 39%                     | N.D.                    |
| 14    | Toluene            | Zn        | 60    | 46%                     | 4%                      |
| 15    | DCM                | Zn        | 60    | 43%                     | 19%                     |
| 16    | DMF                | Zn        | 60    | N.D.                    | N.D.                    |
| 17    | DMA                | Zn        | 60    | N.D.                    | N.D.                    |
| 18    | Xylenes            | Zn        | 60    | 41%                     | Trace                   |
| 19    | Dioxane            | Zn        | 60    | 43%                     | 12%                     |
| 20    | TFT                | Zn        | 60    | 22%                     | N.D.                    |
| 21    | Benzene            | Zn        | 60    | 41%                     | Trace                   |
| 22    | CH <sub>3</sub> CN | Zn        | 60    | N.D.                    | N.D.                    |
| 23    | DMSO               | Zn        | 60    | N.D.                    | N.D.                    |
| 24    | CHCl <sub>3</sub>  | Zn        | 60    | 15%                     | N.D.                    |

[a] GC yield was determined using *n*-dodecane as an internal standard.

**Table S12. Reactions in different solvents (under tetra-deuteration conditions (Mn))**

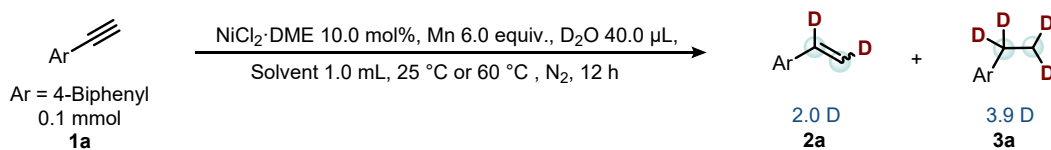

| Entry | Solvent            | Reductant | T (°C) | Yield <sup>[a]</sup> 2a | Yield <sup>[a]</sup> 3a |
|-------|--------------------|-----------|--------|-------------------------|-------------------------|
| 1     | THF                | Mn        | 25     | Trace                   | N.D.                    |
| 2     | Toluene            | Mn        | 25     | Trace                   | 6%                      |
| 3     | DCM                | Mn        | 25     | Trace                   | N.D.                    |
| 4     | DMF                | Mn        | 25     | N.D.                    | N.D.                    |
| 5     | DMA                | Mn        | 25     | N.D.                    | N.D.                    |
| 6     | Xylenes            | Mn        | 25     | Trace                   | 8%                      |
| 7     | Dioxane            | Mn        | 25     | Trace                   | 9%                      |
| 8     | TFT                | Mn        | 25     | N.D.                    | 8%                      |
| 9     | Benzene            | Mn        | 25     | Trace                   | N.D.                    |
| 10    | CH <sub>3</sub> CN | Mn        | 25     | N.D.                    | N.D.                    |
| 11    | DMSO               | Mn        | 25     | N.D.                    | N.D.                    |
| 12    | CHCl <sub>3</sub>  | Mn        | 25     | N.D.                    | N.D.                    |
| 13    | THF                | Mn        | 60     | 65%                     | 5%                      |
| 14    | Toluene            | Mn        | 60     | 74%                     | 14%                     |
| 15    | DCM                | Mn        | 60     | 73%                     | 7%                      |
| 16    | DMF                | Mn        | 60     | N.D.                    | N.D.                    |
| 17    | DMA                | Mn        | 60     | N.D.                    | N.D.                    |
| 18    | Xylenes            | Mn        | 60     | 69%                     | 12%                     |
| 19    | Dioxane            | Mn        | 60     | 69%                     | 9%                      |
| 20    | TFT                | Mn        | 60     | 71%                     | 11%                     |
| 21    | Benzene            | Mn        | 60     | 32%                     | 5%                      |
| 22    | CH <sub>3</sub> CN | Mn        | 60     | N.D.                    | N.D.                    |
| 23    | DMSO               | Mn        | 60     | N.D.                    | N.D.                    |
| 24    | CHCl <sub>3</sub>  | Mn        | 60     | N.D.                    | N.D.                    |

[a] GC yield was determined using *n*-dodecane as an internal standard.

**Reaction conditions under 25°C / 60 °C:** An 8 mL glass vial equipped with a magnetic stir bar was sequentially charged with Zn or Mn powder (6.0 equiv.), 4-ethynyl-1,1'-biphenyl (17.8 mg, 0.1 mmol), and nickel(II) chloride ethylene glycol dimethyl ether complex (NiCl<sub>2</sub>·DME, 2.2 mg, 10.0 mol%). The vial was transferred to a glovebox (purged with nitrogen three times), and anhydrous solvent (1.0 mL) and deuterium oxide (D<sub>2</sub>O, 40 μL) were then added. After sealing, the reaction mixture was stirred at 25 °C in an oil bath for 12 hours. Upon completion of the reaction, the mixture was filtered through a disposable WITEG short-type glass Pasteur pipette packed with cotton and 200-300 mesh silica gel powder, using a mixed solvent of ethyl acetate and petroleum ether (PE:EA =1:1) as the eluent. The yields were determined by GC analysis using *n*-dodecane as an internal standard.

## 4. Synthesis of Substrate

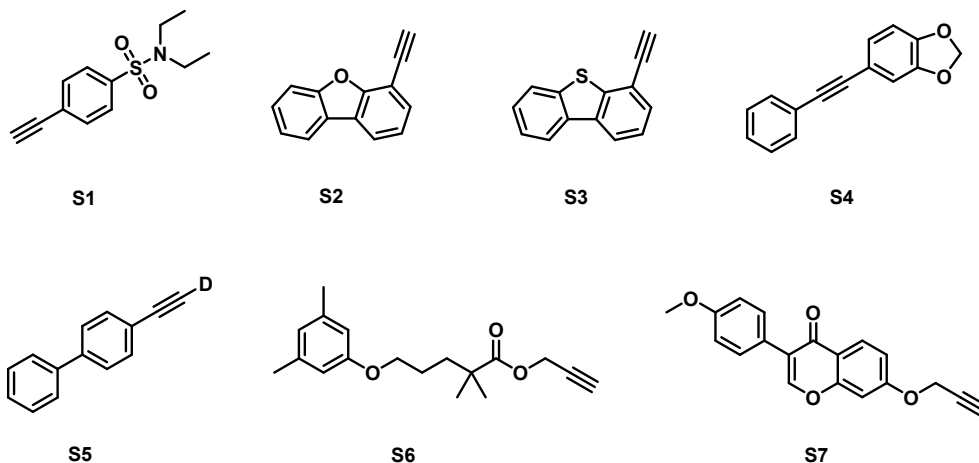

Figure S4: Substrates

Unless otherwise noted, commercial reagents were purchased from Energy Chemical, Bide Pharmatech used as received.

### N,N-diethyl-4-ethynylbenzenesulfonamide (S1)

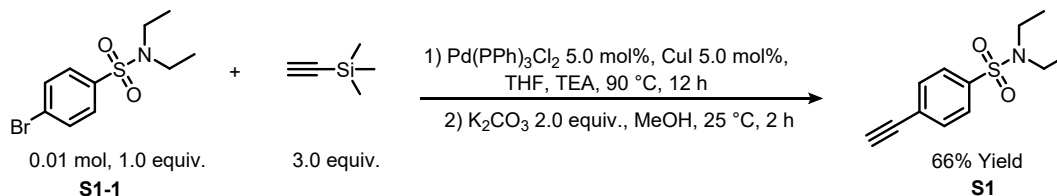

**S1** was synthesized according to a literature procedure.<sup>[1]</sup> To a three-necked flask (equipped with magnetic stir bar and a nitrogen balloon) were added CuI (95 mg, 5.0 mol%), PdCl<sub>2</sub>(PPh<sub>3</sub>)<sub>2</sub> (351 mg, 5.0 mol%) and **S1-1** (2.92 g, 0.01 mol). Next, dry THF (10 mL) and dry TEA (10 mL) were introduced via a disposable syringe. After the addition of the solvents, ethynyl trimethylsilane (2.94 g, 0.03 mol) was added. The reaction mixture was stirred at 90 °C for 24 h. Upon completion of the reaction, as monitored by TLC, the reaction was quenched by the addition of water (20 mL). The mixture was then extracted with ethyl acetate (20 mL × 3). The combined organic extracts were dried over Na<sub>2</sub>SO<sub>4</sub> and concentrated under reduced pressure. The resulting concentrate was directly treated with MeOH (10 mL) and potassium carbonate (5.53 g, 0.04 mol). The reaction mixture was stirred at room temperature for 2 h. After the reaction was completed, as determined by TLC monitoring, the reaction solution was concentrated to dryness under reduced pressure. Water (20 mL) was added, and the mixture was extracted with ethyl acetate (20 mL × 3). The combined organic layer was dried over Na<sub>2</sub>SO<sub>4</sub> and solvent removed under reduced pressure to produce crude product. The crude product was purified by column chromatography on silica gel (PE/EA = 20:1) to afford the pure product. The title compound was afforded as a brownish-yellow oily product (66% yield).

**<sup>1</sup>H NMR** (400 MHz, Chloroform-*d*)  $\delta$  7.72 (d,  $J$  = 8.3 Hz, 2H), 7.55 (d,  $J$  = 8.4 Hz, 2H), 3.23 (s, 1H), 3.18 (q,  $J$  = 7.1 Hz, 4H), 1.07 (t,  $J$  = 7.2 Hz, 6H). **<sup>13</sup>C NMR** (101 MHz, Chloroform-*d*)  $\delta$  140.33, 132.61, 126.86, 126.27, 82.01, 80.61, 42.03, 14.09.

### 5-ethynyldibenzo[b,d]furan (**S2**)

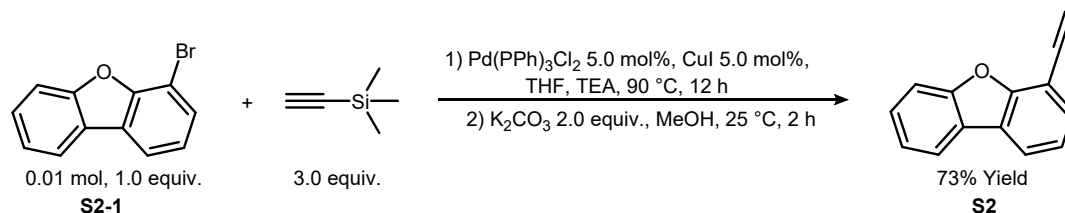

**S2** was synthesized according to a literature procedure.<sup>[1]</sup> To a three-necked flask (equipped with magnetic stir bar, nitrogen balloon) was added CuI (95 mg, 5.0 mol%), PdCl<sub>2</sub>(PPh<sub>3</sub>)<sub>2</sub> (351 mg, 5.0 mol%) and **S2-1** (2.47 g, 0.01 mol). Next, dry THF (10 mL) and dry TEA (10 mL) were introduced via a disposable syringe. After the addition of the solvents, ethynyl trimethylsilane (2.94 g, 0.03 mol) was added. The reaction mixture was stirred at 90 °C for 24 h. Upon completion of the reaction, as monitored by TLC, the reaction was quenched by the addition of water (20 mL). The mixture was then extracted with ethyl acetate (20 mL  $\times$  3). The combined organic extracts were dried over Na<sub>2</sub>SO<sub>4</sub> and concentrated under reduced pressure. The resulting concentrate was directly treated with MeOH (10 mL) and potassium carbonate (5.53 g, 0.04 mol). The reaction mixture was stirred at room temperature for 2 h. After the reaction was completed, as determined by TLC monitoring, the reaction solution was concentrated to dryness under reduced pressure. Water (20 mL) was added, and the mixture was extracted with ethyl acetate (20 mL  $\times$  3). The combined organic layer was dried over Na<sub>2</sub>SO<sub>4</sub> and solvent removed under reduced pressure to produce crude product. The crude product was purified by column chromatography on silica gel (PE/EA = 100:1) to afford the pure product. The title compound was afforded as a yellow oily product (73% yield).

**<sup>1</sup>H NMR** (400 MHz, Chloroform-*d*)  $\delta$  7.96 (d,  $J$  = 7.7 Hz, 2H), 7.67 (d,  $J$  = 8.3 Hz, 1H), 7.60 (d,  $J$  = 8.1 Hz, 1H), 7.52-7.47 (m, 1H), 7.34 (dt,  $J$  = 22.5, 7.6 Hz, 2H), 3.49 (s, 1H). **<sup>13</sup>C NMR** (101 MHz, Chloroform-*d*)  $\delta$  156.59, 156.20, 131.08, 127.74, 124.55, 123.85, 123.19, 122.73, 121.53, 120.87, 112.10, 106.61, 82.35, 78.29.

### 4-bromodibenzo [b,d] thiophene (**S3**)

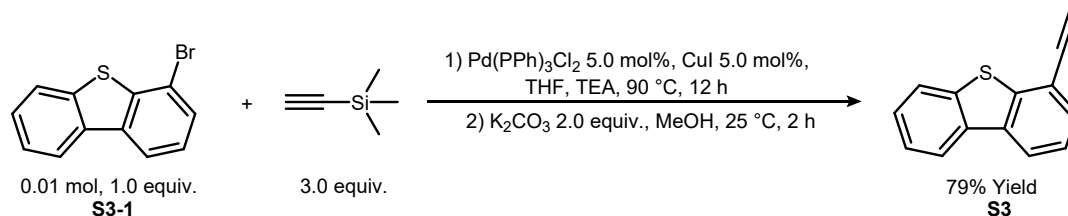

**S3** was synthesized according to a literature procedure.<sup>[1]</sup> The procedure was adapted from a previously reported method. To a three necked flask (equipped with magnetic stir bar, nitrogen balloon) was added CuI (95 mg, 5.0 mol%), PdCl<sub>2</sub>(PPh<sub>3</sub>)<sub>2</sub> (351 mg, 5.0 mol%) and **S3-1** (2.63 g, 0.01 mol). The flask was purged with nitrogen three times. Next, dry THF (10 mL) and dry TEA (10 mL) was introduced via a disposable syringe. After the addition of the solvents, ethynyl

trimethylsilane (2.94 g, 0.03 mol) were added. The reaction mixture was stirred at 90 °C for 24 h. Upon completion of the reaction, as monitored by TLC, the reaction was quenched by the addition of water (20 mL). The mixture was then extracted with ethyl acetate (20 mL × 3). The combined organic extracts were dried over Na<sub>2</sub>SO<sub>4</sub> and concentrated under reduced pressure. The resulting concentrate was directly treated with MeOH (10 mL) and potassium carbonate (5.53 g, 0.04 mol). The reaction mixture was stirred at room temperature for 2 h. After the reaction was completed, as determined by TLC monitoring, the reaction solution was concentrated to dryness under reduced pressure. Water (20 mL) was added, and the mixture was extracted with ethyl acetate (20 mL × 3). The combined organic layer was dried over Na<sub>2</sub>SO<sub>4</sub> and solvent removed under reduced pressure to produce crude product. The crude product was purified by column chromatography on silica gel (PE/EA = 100:1) to afford the pure product. The title compound was afforded as a brownish-yellow oily product (79% yield).

<sup>1</sup>H NMR (400 MHz, Chloroform-*d*) δ 8.14 (d, *J* = 7.8 Hz, 2H), 7.92-7.86 (m, 1H), 7.62 (d, *J* = 7.4 Hz, 1H), 7.52-7.42 (m, 3H), 3.53 (s, 1H). <sup>13</sup>C NMR (101 MHz, Chloroform-*d*) δ 143.06, 139.52, 135.68, 130.47, 127.23, 124.70, 124.52, 123.06, 122.11, 121.96, 116.89, 82.55, 81.33.

#### 5-(phenylethynyl)benzo[d][1,3]dioxole (S4)

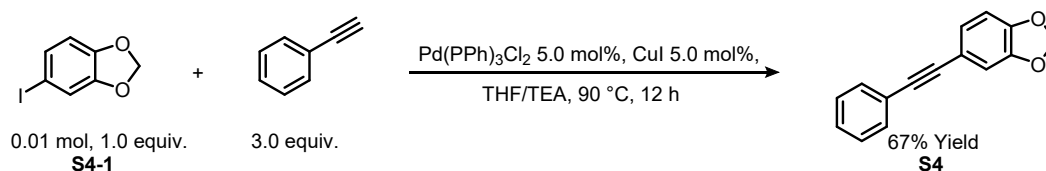

**S4** was synthesized according to a literature procedure.<sup>[1]</sup> To a three necked flask (equipped with magnetic stir bar, nitrogen balloon) was added CuI (95 mg, 5.0 mol%), PdCl<sub>2</sub>(PPh<sub>3</sub>)<sub>2</sub> (351 mg, 5.0 mol%) and **S4-1** (2.48 g, 0.01 mol). Next, dry THF (10 mL) and dry TEA (10 mL) were introduced via a disposable syringe. After the addition of the solvents, ethynylbenzene (3.15 g, 0.03 mol) were added. The reaction mixture was stirred at 90 °C for 24 h. Upon completion of the reaction, as monitored by TLC, the reaction was quenched by the addition of water (20 mL). The mixture was then extracted with ethyl acetate (20 mL × 3). The combined organic extracts were dried over Na<sub>2</sub>SO<sub>4</sub> and concentrated under reduced pressure. The crude product was purified by column chromatography on silica gel (PE/EA = 20:1) to afford the pure product. The title compound was afforded as a white solid product (67% yield).

<sup>1</sup>H NMR (400 MHz, Chloroform-*d*) δ 7.52 (dd, *J* = 7.9, 2.4 Hz, 2H), 7.38-7.31 (m, 3H), 7.08 (dd, *J* = 8.0, 1.6 Hz, 1H), 7.00 (d, *J* = 1.6 Hz, 1H), 6.80 (d, *J* = 8.0 Hz, 1H), 5.99 (s, 2H). <sup>13</sup>C NMR (101 MHz, Chloroform-*d*) δ 148.00, 147.56, 131.60, 128.45, 128.19, 126.38, 123.45, 116.61, 111.66, 108.61, 101.44, 89.43, 87.90.

#### 4-(Ethynyl-2-d)-1,1'-bipheny(S5)

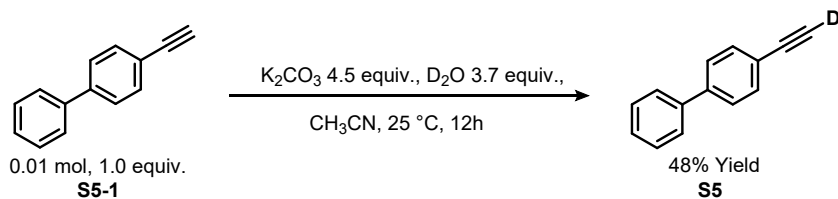

**S5** was synthesized according to a literature procedure.<sup>[2]</sup> A 50 mL round-bottom flask equipped with a magnetic stir bar was sequentially charged with **S5-1** (1.78 g, 0.01 mol),  $\text{K}_2\text{CO}_3$  (6.22 g, 0.045 mol). The flask was transferred to a glovebox, purged with nitrogen three times, and then supplemented with anhydrous  $\text{CH}_3\text{CN}$  (2.0 mL) and deuterated water ( $\text{D}_2\text{O}$ , 40  $\mu\text{L}$ ). After sealing, the reaction mixture was stirred at 25  $^\circ\text{C}$  for 12 hours. The reaction was quenched with distilled water and extracted with dichloromethane ( $3 \times 10$  mL). The organic layers were combined and dried over anhydrous  $\text{Na}_2\text{SO}_4$  then concentrated. The reaction was repeated three times to allow for full deuterium incorporation. The title compound was afforded as a white solid product (48% yield, 96% D).

$^1\text{H NMR}$  (400 MHz, Chloroform-*d*)  $\delta$  7.62-7.55 (m, 6H), 7.49-7.43 (m, 2H), 7.40-7.36 (m, 1H), 3.14 (s, 0.04H).  $^{13}\text{C NMR}$  (101 MHz, Chloroform-*d*)  $\delta$  141.68, 140.36, 132.68, 129.00, 127.86, 127.18, 127.13, 121.08, 83.23, 83.16, 77.36 (multiplet overlapping with  $\text{CDCl}_3$  signal, 1C).

### prop-2-yn-1-yl 2,2-dimethyl-5-(*m*-tolxyloxy) pentanoate (**S6**)

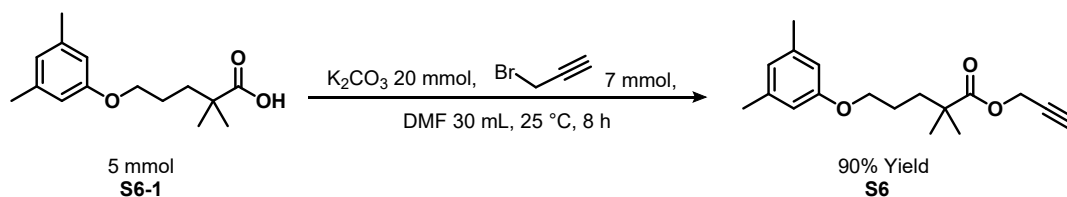

**S6** was synthesized according to a literature procedure.<sup>[3]</sup> A 50 mL round-bottom flask equipped with a magnetic stir bar was sequentially charged with **S6-1** (1.25 g, 5 mmol),  $\text{K}_2\text{CO}_3$  (2.76 g, 20 mmol), DMF (30 mL), 3-bromopropyne (0.85 mL, 7 mmol). After sealing, the reaction mixture was stirred at 25  $^\circ\text{C}$  for 8 hours. The reaction was quenched with distilled water and extracted with dichloromethane ( $3 \times 10$  mL). The organic layers were combined and dried over anhydrous  $\text{Na}_2\text{SO}_4$  then concentrated. The title compound was afforded as colorless oil (90% yield).

$^1\text{H NMR}$  (400 MHz, Chloroform-*d*)  $\delta$  7.06 (d,  $J = 8$  Hz, 1H), 6.71 (d,  $J = 8$  Hz, 1H), 6.69 (s, 1H), 4.71 (m, 2H), 3.97 (m, 2H), 2.48 (m, 1H), 2.35 (s, 3H), 2.23 (s, 3H), 1.80 (m, 4H), 1.30 (s, 6H).  $^{13}\text{C NMR}$  (101 MHz, Chloroform-*d*)  $\delta$  177.00, 156.96, 136.47, 130.34, 123.62, 120.73, 111.95, 77.95, 74.65, 67.83, 51.95, 42.13, 37.10, 25.13, 25.09, 21.46, 15.84.

### 3-(4-methoxyphenyl)-7-(prop-2-yn-1-yloxy)-1 $\lambda^3$ ,4 $\lambda^5$ -chromen-4-one (**S7**)

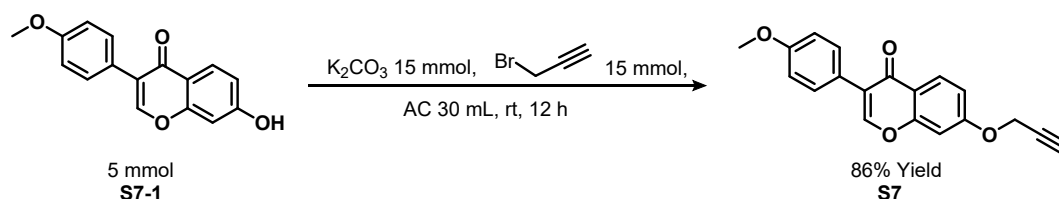

**S7** was synthesized according to a literature procedure.<sup>[1]</sup> A 50 mL round-bottom flask equipped with a magnetic stir bar was sequentially charged with **S7-1** (1.34 g, 5 mmol), K<sub>2</sub>CO<sub>3</sub> (2.07 g, 15 mmol), AC (30 mL). After 15 minutes, 3-bromopropyne (2.55 mL, 15 mmol) was added slowly and heated to reflux until TLC analysis indicated the disappearance of the starting material. The reaction was quenched with distilled water and extracted with dichloromethane (3 × 10 mL). The organic layers were combined and dried over anhydrous Na<sub>2</sub>SO<sub>4</sub> then concentrated. The title compound was afforded as light yellow solid (86% yield).

<sup>1</sup>H NMR (400 MHz, Chloroform-*d*) δ 8.24 (d, *J* = 8 Hz, 1H), 7.92 (s, 1H), 7.51 (d, *J* = 12 Hz, 2H), 7.06 (q, *J* = 12 Hz, 1H), 6.98 (m, 3H), 4.80 (s, 2H), 3.83 (s, 3H), 2.60 (m, 1H). <sup>13</sup>C NMR (101 MHz, Chloroform-*d*) δ 175.84, 161.66, 159.60, 157.67, 152.19, 130.15, 127.97, 124.94, 124.12, 119.02, 114.84, 113.98, 101.52, 56.24, 55.36.

## 5. Mechanistic Studies

### 5.1 Competition experiment between alkynes and alkenes

**Table S13. Competition experiment between alkynes and alkenes under semi-deuteration conditions (Zn)**

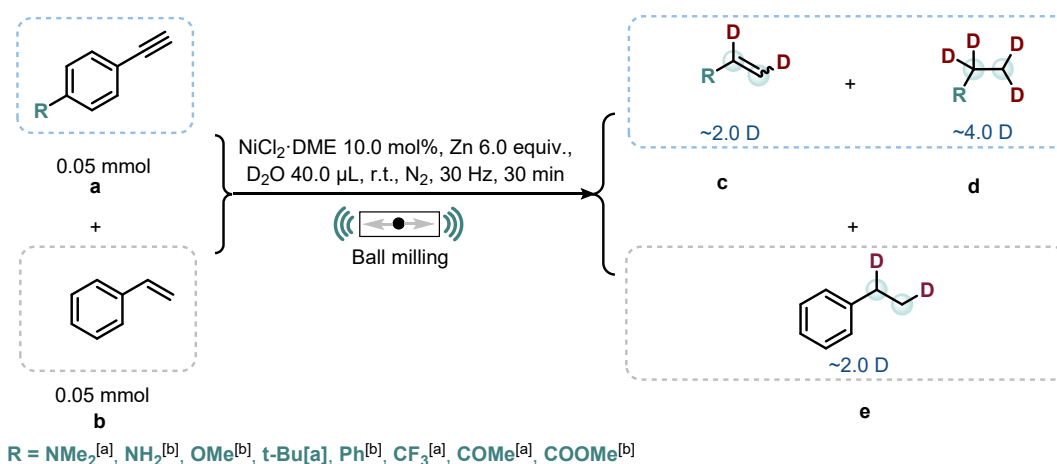

| Entry | R groups          | a   | b   | c   | d    | e    |
|-------|-------------------|-----|-----|-----|------|------|
| 1     | -NMe <sub>2</sub> | 56% | 99% | 28% | N.D. | N.D. |
| 2     | -NH <sub>2</sub>  | 39% | 98% | 60% | N.D. | N.D. |
| 3     | -OMe              | 60% | 97% | 26% | N.D. | N.D. |
| 4     | - <i>t</i> -Bu    | 85% | 99% | 7%  | N.D. | N.D. |
| 5     | -Ph               | 37% | 99% | 49% | N.D. | N.D. |
| 6     | -CF <sub>3</sub>  | 85% | 91% | 12% | N.D. | N.D. |
| 7     | -COMe             | 1%  | 93% | 68% | 1%   | N.D. |
| 8     | -COOMe            | 6%  | 91% | 85% | N.D. | N.D. |

[a] GC yield was determined using *n*-dodecane as an internal standard. [b] Isolated yields.

**Table S14. Competition experiment between alkynes and alkenes under semi-deuteration conditions (Zn)**

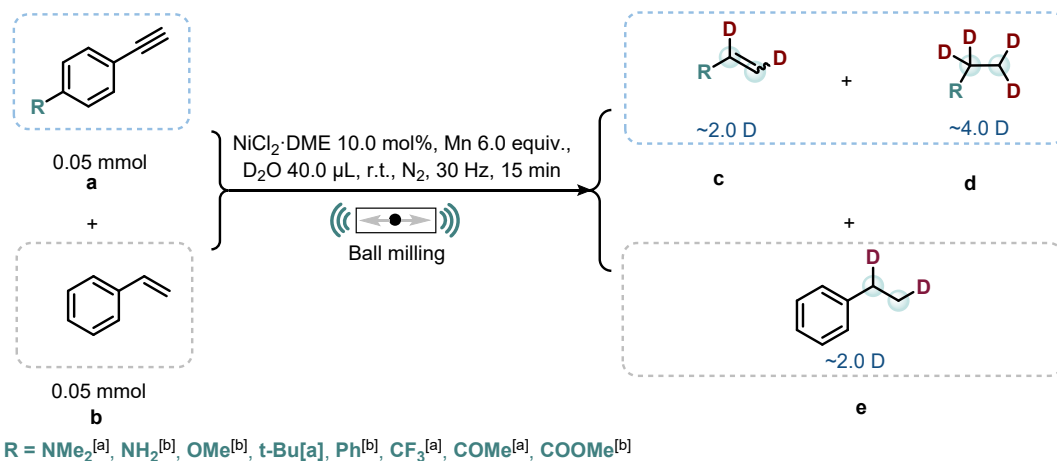

| Entry | R groups          | b   | e   | a   | c   | d   |
|-------|-------------------|-----|-----|-----|-----|-----|
| 1     | -NMe <sub>2</sub> | 9%  | 59% | 2%  | 7%  | 53% |
| 2     | -NH <sub>2</sub>  | 6%  | 54% | 5%  | 1%  | 54% |
| 3     | -OMe              | 13% | 53% | 5%  | 12% | 69% |
| 4     | - <i>t</i> -Bu    | 5%  | 57% | 6%  | 5%  | 38% |
| 5     | -Ph               | 1%  | 92% | 1%  | 1%  | 89% |
| 6     | -CF <sub>3</sub>  | 16% | 53% | 16% | 8%  | 46% |
| 7     | -COMe             | 1%  | 89% | 1%  | 18% | 12% |
| 8     | -COOMe            | 7%  | 58% | 1%  | 3%  | 76% |

[a] GC yield was determined using *n*-dodecane as an internal standard. [b] Isolated yield.

**Reaction condition:** A 5 mL stainless-steel ball milling jar was charged with Mn or Zn powder (6.0 equiv.), alkyne substrates (0.05 mmol), styrene (0.05 mmol), and nickel(II) chloride ethylene glycol dimethyl ether complex ( $\text{NiCl}_2\cdot\text{DME}$ , 10.0 mol%). Subsequently, the jar was transferred into a nitrogen filled glovebox. Inside the glovebox, 40  $\mu\text{L}$  of deuterium oxide ( $\text{D}_2\text{O}$ ) were added to the jar. Afterwards, a stainless-steel grinding ball with a diameter of 10 mm was placed into the jar. The jar was sealed and then placed in a Retsch MM400 mixer mill, where it was milled at 30 Hz for 15 (30) minutes respectively. Upon completion of the ball milling process, the reaction mixture was diluted with a mixed solvent of ethyl acetate and petroleum ether at a volume ratio of 1:1 (PE:EA = 1:1). The mixture was then filtered through a disposable WITEG short-type glass Pasteur pipette packed with cotton and 200-300 mesh silica gel powder, using the same ethyl acetate and petroleum ether mixed solvent (PE:EA = 1:1) as the eluent.

**Conclusions:** Competitive experiments revealed that under Zn powder conditions, the alkyne substrate **a** was reduced to the semi-deuterated alkene **c**, whereas the alkene substrate **b** remained unreacted. Under Mn conditions, the alkyne substrate **a** was reduced to both the semi-deuterated product **c** and the tetra-deuterated product **d**, while the alkene substrate **b** was further reduced to the alkane product **e**. Moreover, the electronic nature of substituents on the alkyne, whether electron-withdrawing or electron-donating, showed little influence on the reaction selectivity.

## 5.2 Radical capture experiments

### 5.2.1 Radical trapping experiments

Table S15. The influence of diverse radical scavengers on semi-deuteration conditions (Zn) /

### tetra-deuteration conditions (Mn)

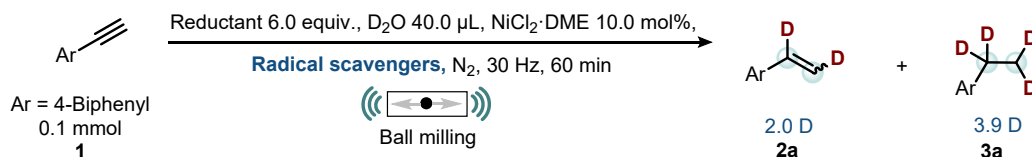

| Entry | Reductant | Radical scavengers   | Yield <sup>[a]</sup> 2a | Yield <sup>[a]</sup> 3a |
|-------|-----------|----------------------|-------------------------|-------------------------|
| 1     | Zn        | TEMPO                | 40%                     | 1%                      |
| 2     | Zn        | BHT                  | 41%                     | N.D.                    |
| 3     | Zn        | 1,1-Diphenylethylene | 74%                     | N.D.                    |
| 4     | Mn        | TEMPO                | 47%                     | 5%                      |
| 5     | Mn        | BHT                  | 26%                     | 3%                      |
| 6     | Mn        | 1,1-Diphenylethylene | 14%                     | 40%                     |

[a] GC yield was determined using *n*-dodecane as an internal standard.

**Data analysis:** Upon completion of the reaction and standard workup procedures, no radical adduct products were detected. However, the GC yields of the reactions containing TEMPO and BHT decreased significantly. This suppression may be attributed to the oxidative nature of TEMPO, which likely oxidized the zinc powder and prematurely terminated the reaction. Similarly, the weak acidity of BHT might have compromised the reducing capacity of the zinc powder, thereby diminishing its catalytic efficacy.

### 5.2.2 Radical trapping experiments : (cyclopropyl ethynyl) benzene

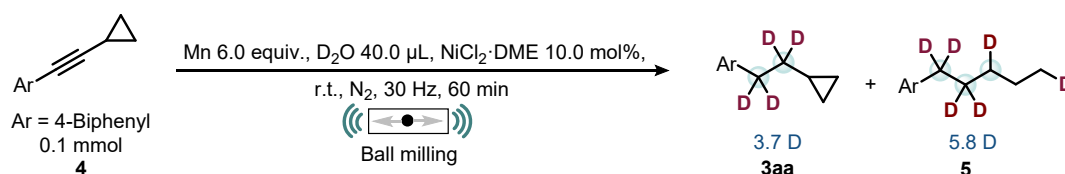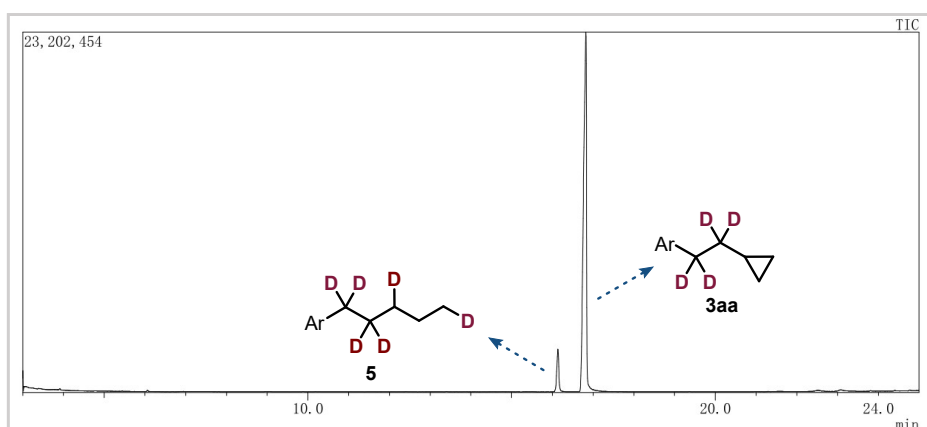

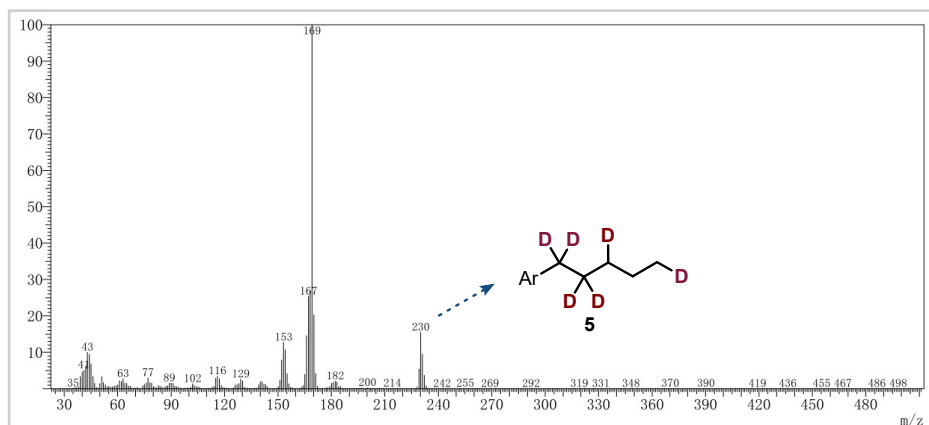

Figure S5: GC-MS of 4 reaction system

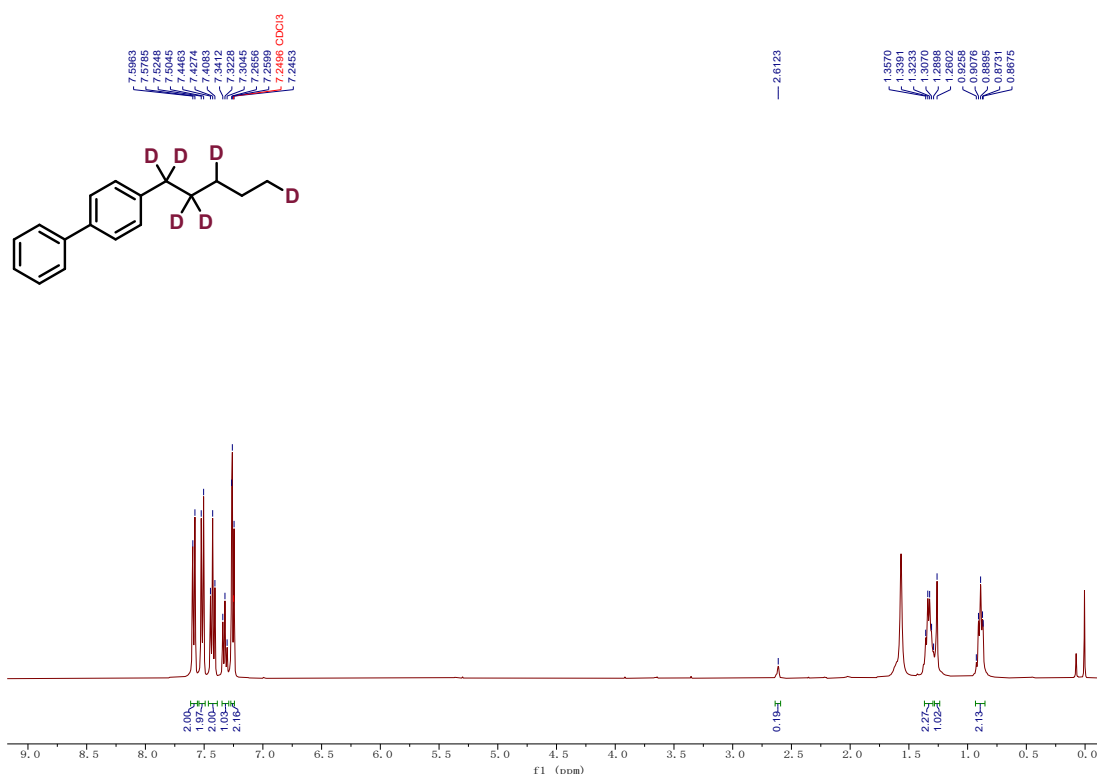

$^1\text{H NMR}$  (400 MHz, Chloroform-*d*)  $\delta$  7.59 (d,  $J = 7.1$  Hz, 2H), 7.51 (d,  $J = 8.1$  Hz, 2H), 7.43 (t,  $J = 7.6$  Hz, 2H), 7.32 (t,  $J = 7.3$  Hz, 1H), 7.27-7.24 (m, 2H), 2.61 (s, 0.19H), 1.33 (q,  $J = 6.8$  Hz, 2H), 1.26 (s, 1H), 0.89 (m, 2H).

**Conclusions:** Employing 4-(cyclopropylethynyl)-1,1'-biphenyl (65.5 mg, 0.3 mmol, purchased from Bide Pharmatech) as the substrate, we conducted radical clock experiments under tetra-deuteration. Under tetra-deuteration conditions, with prolonged reaction time, GC-MS results showed a small amount of ring-opening product with an isolated yield of only 5%. Through  $^1\text{H NMR}$  spectroscopy and high-resolution mass spectrometry, the structure of the ring-opening product was confirmed to be correct.<sup>[4]</sup> However, the yield of the tetra-deuterated target product was as high as 79%. After a literature survey, we tend to attribute this trace amount of ring opening to the homolysis of the carbon-metal bond.<sup>[5]</sup>

### 5.2.3 Radical trapping experiments: N-methyl-N-benzylpropionamide

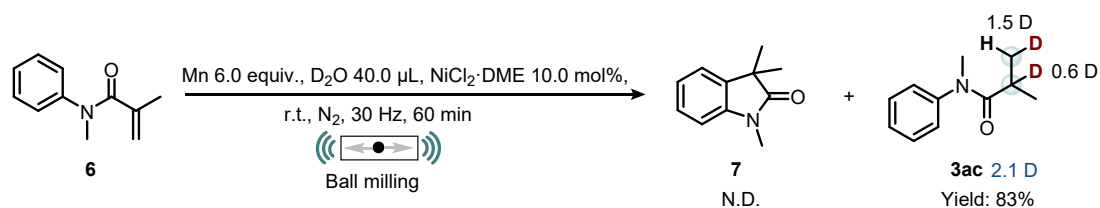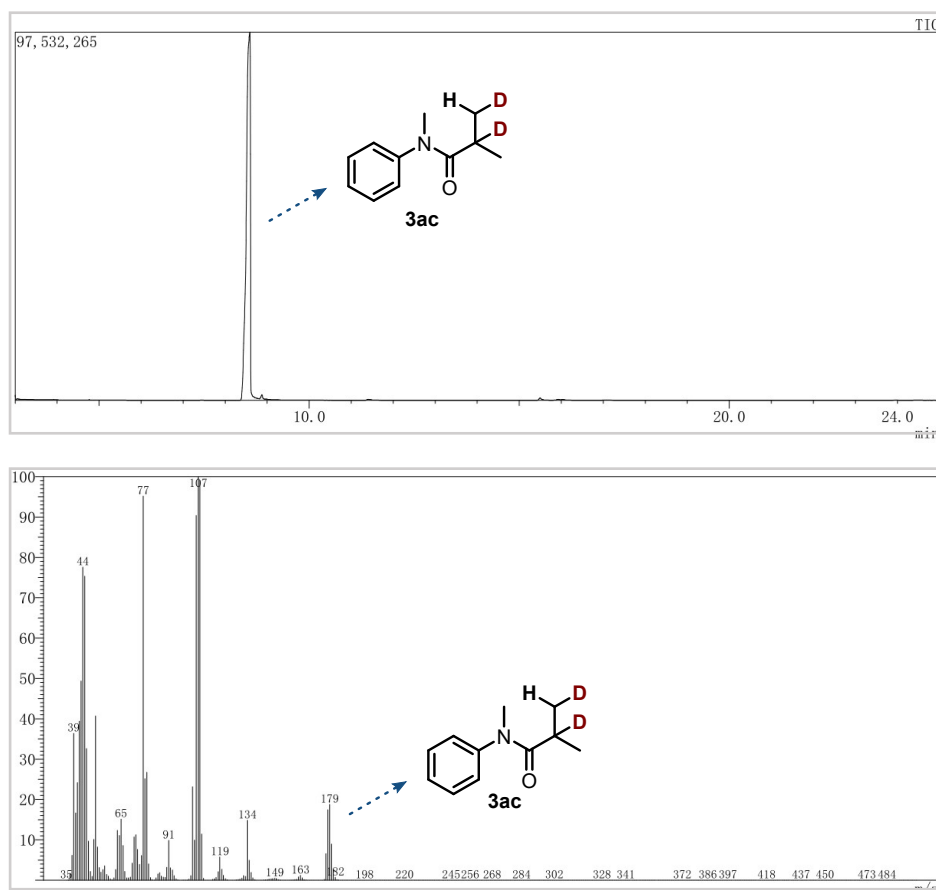

Figure S6: GC-MS of 6 reaction system

**Conclusions:** To further verify the potential involvement of radical pathways, we employed N-methyl-N-phenylmethacrylamide (17.5 mg, 0.1 mmol, purchased from Bide Pharmatech) as a radical clock probe under tetra-deuteration conditions. If an alkyl radical is generated, intramolecular cyclization at the  $\alpha$ -position of the aniline moiety would afford cyclized product **7**. Notably, no formation of **7** was observed. In contrast, the yield of the reduced product **3ac** was 83%. This evidence further rules out the radical mechanism.<sup>[6]</sup>

### 5.3 Terminal site hydrogen atom transfer experiment

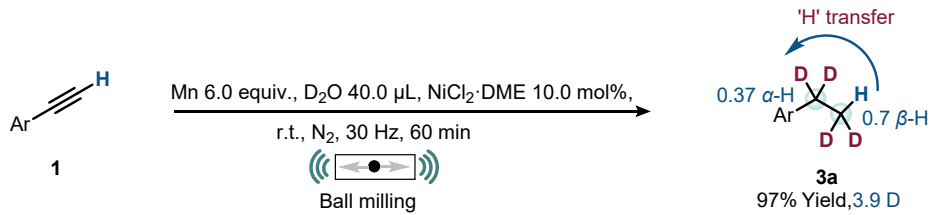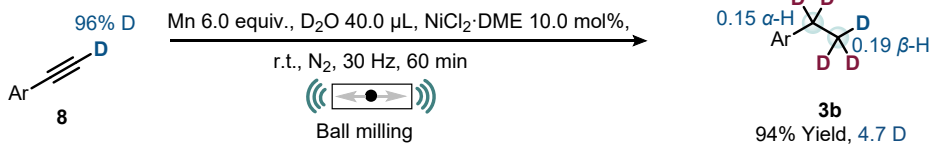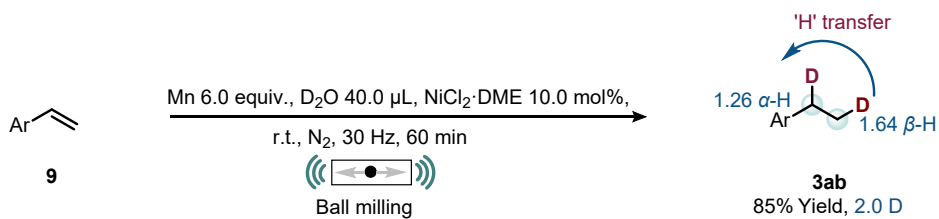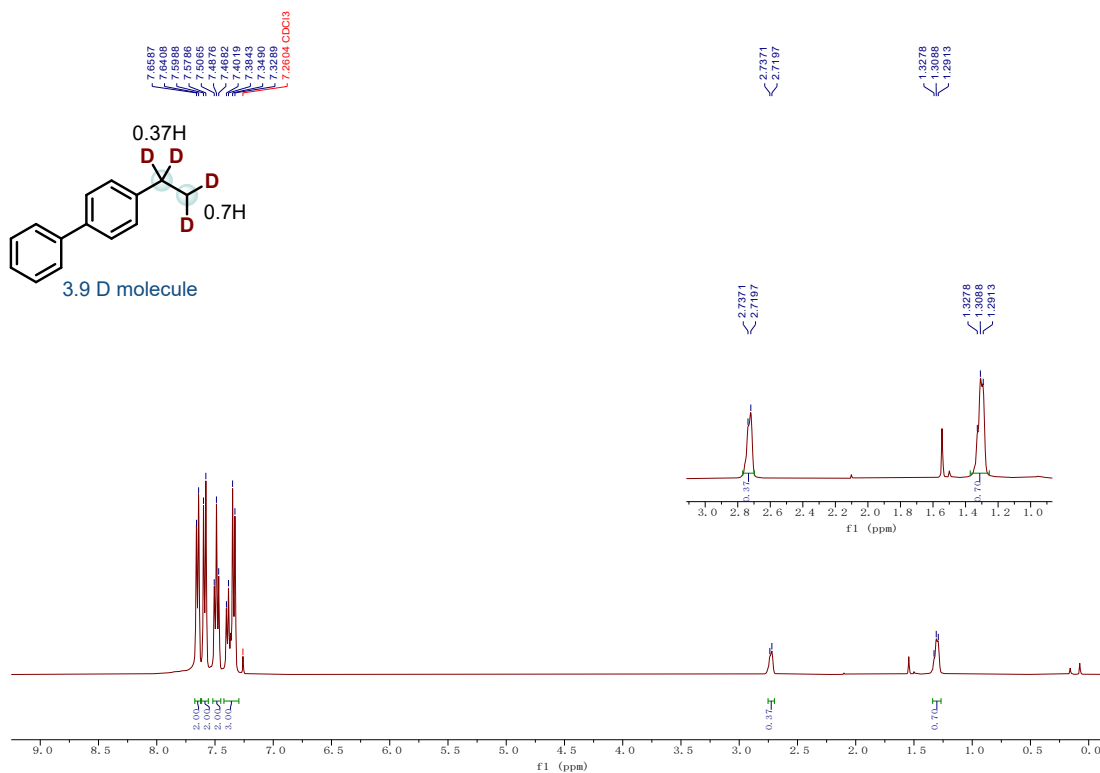

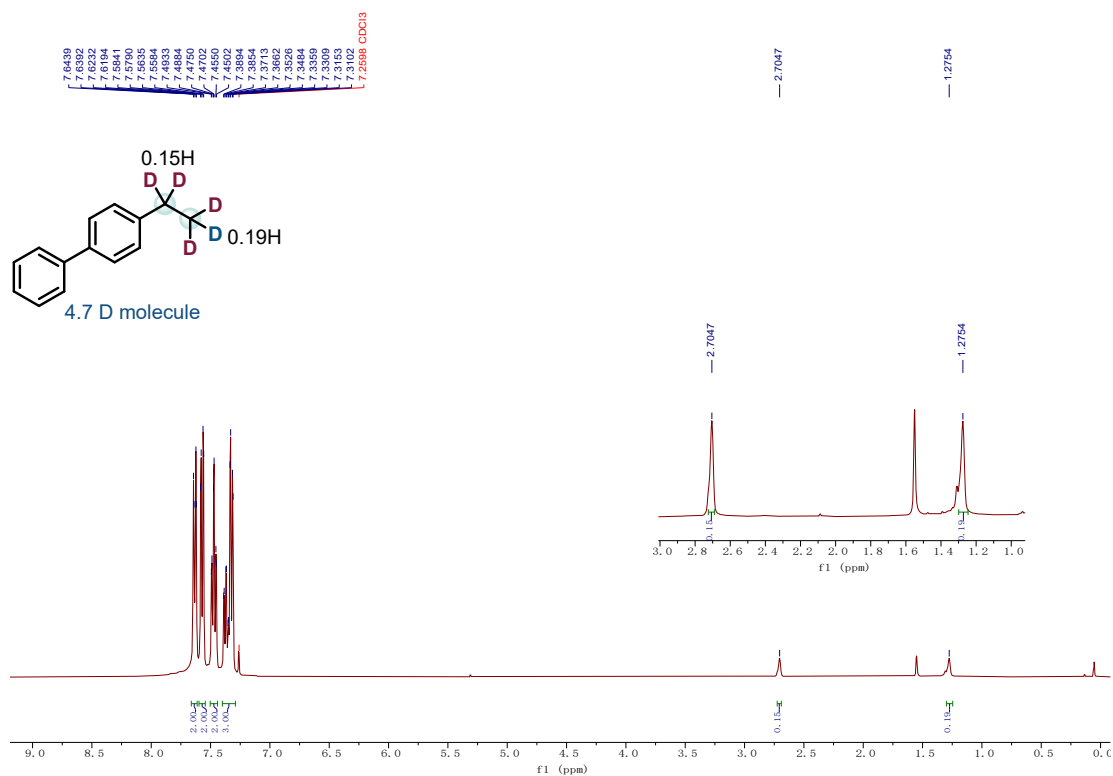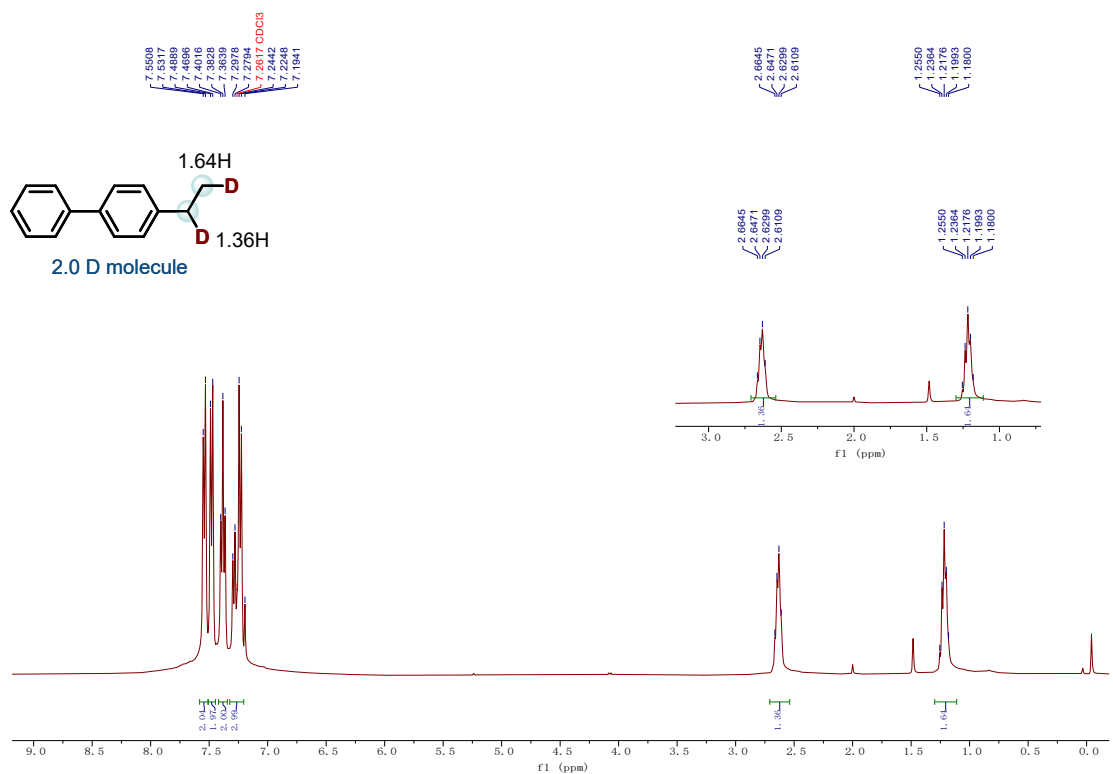

**Conclusions:** Experimental observations indicate that the integration of the terminal alkyne proton, initially expected to be around 1.31 ppm, did not reach the theoretical value of 1, and part of the hydrogen signal migrated to 2.72 ppm. This phenomenon was also observed in 3ad. When using deuterium-substituted **9** as the substrate, the hydrogen at 2.72 ppm decreased significantly, further supporting that the H at the  $\alpha$ -position originates from migration from the  $\beta$ -position. Supported by literature research, we propose that Ni-H migration causes this phenomenon.<sup>[7]</sup>

## 5.4 Control experiments using Ni(COD)<sub>2</sub>

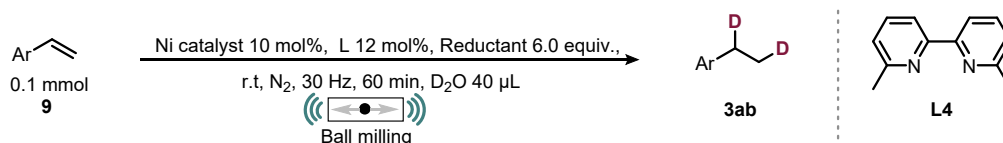

**Table S16. Control experiments using Ni(COD)<sub>2</sub>**

| Entry | Reductant | L  | Ni catalyst 10 mol%    | Yield <sup>[a]</sup> <b>3ab</b> |
|-------|-----------|----|------------------------|---------------------------------|
| 1     | Zn        | /  | NiCl <sub>2</sub> ·DME | N.D.                            |
| 2     | Zn        | /  | Ni(COD) <sub>2</sub>   | N.D.                            |
| 3     | Mn        | /  | NiCl <sub>2</sub> ·DME | 85%                             |
| 4     | Mn        | /  | Ni(COD) <sub>2</sub>   | 81%                             |
| 5     | /         | /  | Ni(COD) <sub>2</sub>   | N.D.                            |
| 6     | /         | L4 | Ni(COD) <sub>2</sub>   | N.D.                            |
| 7     | Zn        | L4 | Ni(COD) <sub>2</sub>   | N.D.                            |
| 8     | Mn        | L4 | Ni(COD) <sub>2</sub>   | 99%                             |

[a] GC yield was determined using *n*-dodecane as an internal standard.

**Conclusions:** We wondered whether a Ni<sup>0</sup> species might underlie the observed selectivity differences. However, when Ni(COD)<sub>2</sub> was used alone, no alkane product was formed. We considered whether this was due to the lack of a ligand, as **L4** was the most effective ligand in the ligand screening. Therefore, we added Ni(COD)<sub>2</sub> + **L4**, but after the reaction, only the starting material remained. However, when a combination of Mn and Ni(COD)<sub>2</sub> achieved full conversion from alkene to deuterated alkane **3ab**, while the combination of Zn and Ni(COD)<sub>2</sub> did not promote the reaction. Based on the experimental results, we suspect that under the Mn condition, NiCl<sub>2</sub>·DME and Ni(COD)<sub>2</sub> may play similar roles, with NiCl<sub>2</sub>·DME more likely to reduce to the zero-valent nickel state.

## 5.5 The effect of divalent Zn and Mn on the system

**Table S17. The influence of divalent Zn and Mn on semi-deuteration conditions (Zn) / tetra-deuteration conditions (Mn)**

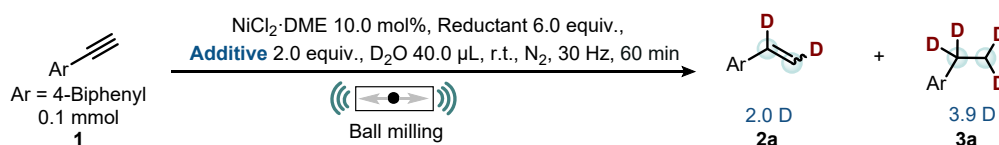

| Entry | Reductant | Additive          | Yield <sup>[a]</sup> <b>2a</b> | Yield <sup>[a]</sup> <b>3a</b> |
|-------|-----------|-------------------|--------------------------------|--------------------------------|
| 1     | Mn        | ZnCl <sub>2</sub> | 87%                            | 6%                             |
| 2     | Mn        | ZnBr <sub>2</sub> | 71%                            | 15%                            |
| 3     | Mn        | MnCl <sub>2</sub> | 1%                             | 91%                            |
| 4     | Mn        | MnBr <sub>2</sub> | N.D.                           | 93%                            |
| 5     | Zn        | ZnCl <sub>2</sub> | 70%                            | N.D.                           |
| 6     | Zn        | MnCl <sub>2</sub> | 77%                            | 3%                             |

[a] GC yield was determined using *n*-dodecane as an internal standard.

**Conclusions:** The reaction results show that the addition of ZnCl<sub>2</sub> in the system inhibits the significant formation of alkanes, whereas MnCl<sub>2</sub> exerts no substantial effect on the reaction. This provides another possibility for the retention of semi-deuteration under Zn conditions.

## 5.6 Control experiment: comparison between H<sub>2</sub>O and D<sub>2</sub>O

**Table S18. Influence of H<sub>2</sub>O/D<sub>2</sub>O on semi-deuteration conditions (Zn) / tetra-deuteration conditions (Mn)**

| Entry | Reductant | H/D source       | Yield <sup>[a]</sup> 2a | Yield <sup>[a]</sup> 3a |
|-------|-----------|------------------|-------------------------|-------------------------|
| 1     | Zn        | H <sub>2</sub> O | 30%                     | N.D.                    |
| 2     | Zn        | D <sub>2</sub> O | 26%                     | N.D.                    |
| 3     | Mn        | H <sub>2</sub> O | 30%                     | 3%                      |
| 4     | Mn        | D <sub>2</sub> O | 56%                     | 17%                     |

[a] GC yield was determined using *n*-dodecane as an internal standard.

**Conclusions:** Under Zn powder reduction, the yields with H<sub>2</sub>O and D<sub>2</sub>O were comparable, indicating that deuterium incorporation is not the rate determining step under semi-deuteration conditions. Under Mn powder reduction, however, the yield with D<sub>2</sub>O was significantly higher than with H<sub>2</sub>O, suggesting that D<sub>2</sub>O addition plays a more critical role under tetra-deuteration conditions. These results further highlight the marked difference between the Zn and Mn reduction systems.

## 5.7 Control experiments: monometallic and bimetallic catalysis (Zn powder, Mn powder, Ni powder)

**Table S19. Impact of monometallic versus bimetallic catalysis on product selectivity**

| Entry | Reductant | Ni powder | Yield <sup>[a]</sup> 2a | Yield <sup>[a]</sup> 3a |
|-------|-----------|-----------|-------------------------|-------------------------|
| 1     | Mn        | 10 mol%   | 31%                     | 3%                      |
| 2     | Mn        | 50 mol%   | 54%                     | 20%                     |
| 3     | Mn        | 100 mol%  | N.D.                    | 80%                     |
| 4     | Zn        | 10 mol%   | 91%                     | N.D.                    |
| 5     | Zn        | 50 mol%   | 81%                     | N.D.                    |

|    |    |          |      |      |
|----|----|----------|------|------|
| 6  | Zn | 100 mol% | 31%  | 41%  |
| 7  | /  | 200 mol% | N.D. | N.D. |
| 8  | /  | 400 mol% | N.D. | N.D. |
| 9  | /  | 600 mol% | N.D. | N.D. |
| 10 | Zn | /        | 54%  | N.D. |
| 11 | Mn | /        | 52%  | N.D. |

[a] GC yield was determined using *n*-dodecane as an internal standard.

**Conclusions:** The experimental results show that Ni powder alone failed to promote the reaction, while Zn or Mn individually afforded small amounts of the semi-deuterated product with low yields, and no tetra-deuterated product was detected. When Zn powder was combined with Ni powder, the yield of the semi-deuterated product increased significantly; when Mn powder was combined with Ni powder, complete conversion to the tetra-deuterated product was achieved, further highlighting the catalytic effect of the bimetallic system.

## 5.8 X-ray diffraction (XRD) analysis of alloy formation under ball-milling conditions

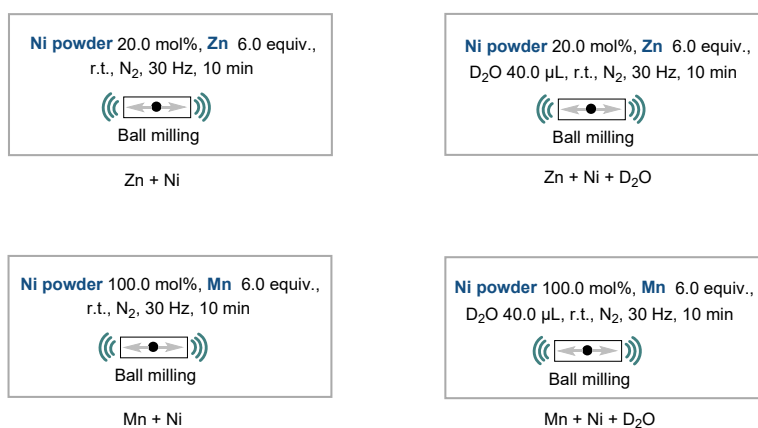

**Figure S7: Experimental conditions for alloy formation**

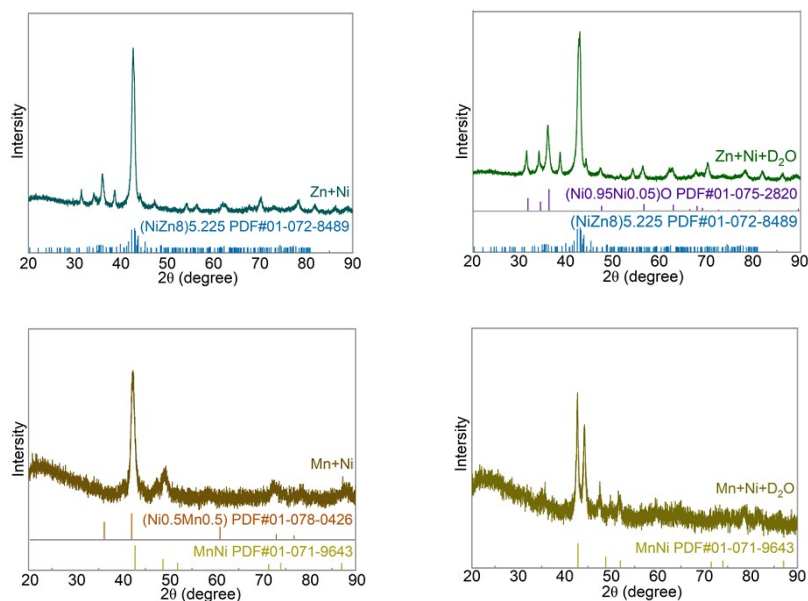

Figure S8: XRD analysis of alloy formation<sup>[8]</sup>

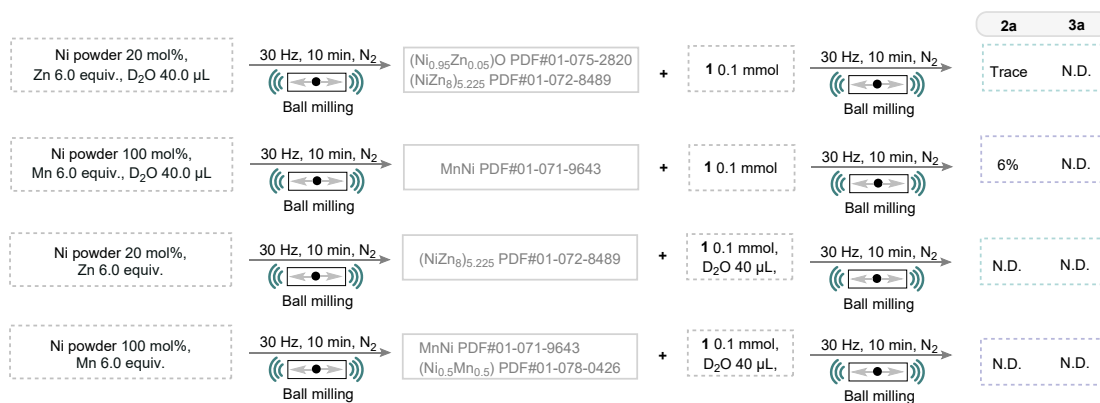

Figure S9: Impact of alloy composition on product selectivity

**Conclusions:** Interestingly, we detected the formation of the corresponding Zn-Ni and Mn-Ni alloys under ball-milling conditions. Unfortunately, when the substrate was added to the pre-milled alloy samples, the yields remained very low and did not improve significantly. Thus, we hypothesize that these alloys may not be the key determinants of selectivity. Under Zn conditions, 20 mol% of Ni powder was selected because, as shown in Table S16, using 10 mol% of Ni powder already afforded 91% yield of the semi-deuterated product (Entry 4); therefore, 20 mol% was added to compensate for possible nickel loss during the reaction. Under Mn conditions, 100 mol% of Ni powder was used because Table S16 indicates that a full conversion to the alkane product could only be achieved when 100 mol% of nickel powder was employed.

## 6. Characterization Data

### 4-(vinyl-1,2-d<sub>2</sub>)-1,1'-biphenyl (**2a**)

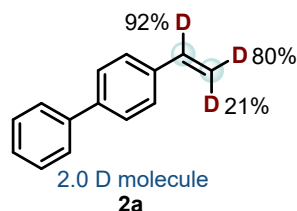

Synthesized from 4-ethynyl-1,1'-biphenyl (17.8 mg, 0.10 mmol) following the general procedure for semi-deuteration, the reaction was carried out in 5 mL stainless-steel jars with stainless-steel balls (diameter 10 mm) and then milled at a frequency of 30 Hz for 60 minutes. The product was obtained and purified by flash column chromatography on silica (PE) to give 4-(vinyl-1,2-d<sub>2</sub>)-1,1'-biphenyl (**2a**) as a white solid (89% yield).<sup>[9]</sup>

<sup>1</sup>H NMR (400 MHz, Chloroform-*d*)  $\delta$  7.64-7.57 (m, 4H), 7.51-7.43 (m, 4H), 7.36 (t,  $J$  = 7.3 Hz, 1H), 6.77 (d,  $J$  = 17.4 Hz, 0.08H), 5.79 (t,  $J$  = 2.4 Hz, 0.79H), 5.27 (t,  $J$  = 1.6 Hz, 0.20H). <sup>13</sup>C NMR (101 MHz, Chloroform-*d*)  $\delta$  140.85, 140.70, 136.63, 128.92, 127.45, 127.36, 127.10, 126.76, 113.61.

### 4-(vinyl-d<sub>3</sub>)-1,1'-biphenyl (**2b**)

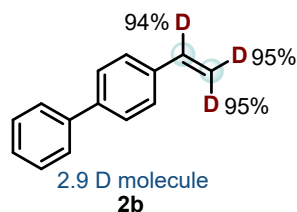

Synthesized from 4-(ethynyl-d)-1,1'-biphenyl (17.9 mg, 0.10 mmol) following the general procedure for semi-deuteration, the reaction was carried out in 5 mL stainless-steel jars with stainless-steel balls (diameter 10 mm) and then milled at a frequency of 30 Hz for 60 minutes. The product was obtained and purified by flash column chromatography on silica (PE) to give 4-(vinyl-d<sub>3</sub>)-1,1'-biphenyl (**2b**) as a white solid (85% yield).<sup>[9]</sup>

<sup>1</sup>H NMR (400 MHz, Chloroform-*d*)  $\delta$  7.63-7.57 (m, 4H), 7.49-7.43 (dd,  $J$  = 22.9, 8.1 Hz, 4H), 7.34 (t,  $J$  = 7.3 Hz, 1H), 6.76 (t,  $J$  = 2.4 Hz, 0.04H), 5.78 (t,  $J$  = 2.6 Hz, 0.05H), 5.27 (t,  $J$  = 1.4 Hz, 0.05H). <sup>13</sup>C NMR (101 MHz, Chloroform-*d*)  $\delta$  140.86, 140.69, 136.63, 136.33, 128.92, 127.45, 127.36, 127.10, 126.76, 113.47.

### 4-ethyl-4'-(vinyl-1,2-d<sub>2</sub>)-1,1'-biphenyl (2c)

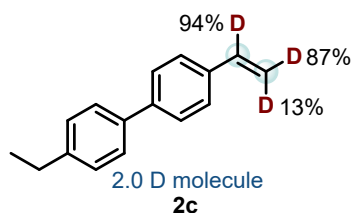

Synthesized from 4-ethyl-4'-ethynyl-1,1'-biphenyl (20.6 mg, 0.10 mmol) following the general procedure for semi-deuteration, the reaction was carried out in 5 mL stainless-steel jars with stainless-steel balls (diameter 10 mm) and then milled at a frequency of 30 Hz for 60 minutes. The product was obtained and purified by flash column chromatography on silica (PE) to give 4-ethyl-4'-(vinyl-1,2-d<sub>2</sub>)-1,1'-biphenyl (**2c**) as a white solid (93% yield).

<sup>1</sup>H NMR (400 MHz, Chloroform-*d*)  $\delta$  7.58-7.48 (m, 6H), 7.30 (d,  $J = 8.1$  Hz, 2H), 6.79 (d,  $J = 17.6$  Hz, 0.06H), 5.78 (t,  $J = 2.5$  Hz, 0.87H), 5.26 (d,  $J = 2.5$  Hz, 0.13H), 2.70 (q,  $J = 7.6$  Hz, 2H), 1.31 (t,  $J = 7.6$  Hz, 3H). <sup>13</sup>C NMR (101 MHz, Chloroform-*d*)  $\delta$  143.63, 140.67, 138.22, 136.15, 128.45, 127.18, 127.01, 126.73, 126.71, 113.40, 28.66, 15.75. MS (EI): C<sub>16</sub>H<sub>13</sub>D<sub>2</sub>, Exact mass: 210.05.

### 2-(vinyl-1,2-d<sub>2</sub>)naphthalene (2d)

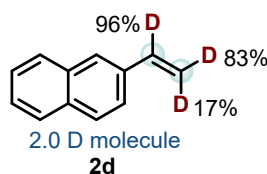

Synthesized from 2-ethynyl naphthalene (15.2 mg, 0.10 mmol) following the general procedure for semi-deuteration, the reaction was carried out in 5 mL stainless-steel jars with stainless-steel balls (diameter 10 mm) and then milled at a frequency of 30 Hz for 60 minutes. The product was obtained and purified by flash column chromatography on silica (PE) to give 2-(vinyl-1,2-d<sub>2</sub>)naphthalene (**2d**) as a white solid (82% yield).<sup>[9]</sup>

<sup>1</sup>H NMR (400 MHz, Chloroform-*d*)  $\delta$  7.83-7.76 (m, 4H), 7.67 (d,  $J = 8.6$  Hz, 1H), 7.50-7.40 (m, 2H), 6.88 (d,  $J = 17.5$  Hz, 0.04H), 5.88 (t,  $J = 2.6$  Hz, 0.83H), 5.34 (d,  $J = 6.0$  Hz, 0.17H). <sup>13</sup>C NMR (101 MHz, Chloroform-*d*)  $\delta$  136.94, 135.04, 133.67, 133.26, 128.29, 128.18, 127.80, 126.49, 126.37, 126.04, 123.26, 113.89.

### 9-(vinyl-1,2-d<sub>2</sub>)phenanthrene (2e)

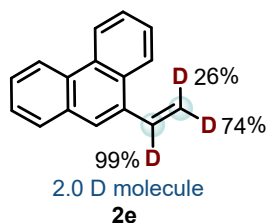

Synthesized from 9-ethynylphenanthrene (20.2 mg, 0.10 mmol) following the general procedure for semi-deuteration, the reaction was carried out in 5 mL stainless-steel jars with stainless-steel

balls (diameter 10 mm) and then milled at a frequency of 30 Hz for 60 minutes. The product was obtained and purified by flash column chromatography on silica (PE:EA = 200:1) to give 9-(vinyl-1,2-d<sub>2</sub>)phenanthrene (**2e**) as a white solid (84% yield).

**<sup>1</sup>H NMR** (400 MHz, Chloroform-*d*) δ 8.74 (d, *J* = 7.5 Hz, 1H), 8.68 (d, *J* = 8.0 Hz, 1H), 8.18 (d, *J* = 8.6 Hz, 1H), 7.91-7.86 (m, 2H), 7.66 (tt, *J* = 15.8, 7.1 Hz, 4H), 5.86 (t, *J* = 2.6 Hz, 0.74H), 5.53 (s, 0.26H). **<sup>13</sup>C NMR** (101 MHz, Chloroform-*d*) δ 134.69, 131.91, 130.67, 130.44, 130.38, 128.82, 126.90, 126.87, 126.80, 126.76, 126.64, 126.60, 124.75, 123.19, 122.64, 117.25. **MS** (EI): C<sub>16</sub>H<sub>9</sub>D<sub>2</sub>, Exact mass: 206.00.

### 1-(vinyl-1,2-d<sub>2</sub>)pyrene (**2f**)

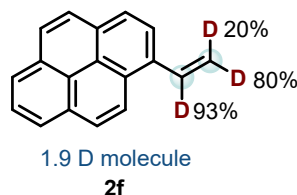

Synthesized from 1-ethynylpyrene (22.8 mg, 0.10 mmol) following the general procedure for semi-deuteration, the reaction was carried out in 5 ml stainless-steel jars with stainless-steel balls (diameter 10 mm) and then milled at a frequency of 30 Hz for 60 minutes. The product was obtained and purified by flash column chromatography on silica (PE:EA = 200:1) to give 1-(vinyl-1,2-d<sub>2</sub>) pyrene (**2f**) as a yellow solid (81% yield).

**<sup>1</sup>H NMR** (400 MHz, Chloroform-*d*) δ 8.39 (d, *J* = 9.3 Hz, 1H), 8.31-7.98 (m, 8H), 5.98 (s, 0.8H), 5.81 (s, 0.07H), 5.60 (d, *J* = 4.9 Hz, 0.20H). **<sup>13</sup>C NMR** (101 MHz, Chloroform-*d*) δ 134.24, 132.40, 131.60, 131.09, 131.03, 128.23, 127.71, 127.57, 127.41, 126.08, 125.38, 125.17, 125.14, 125.05, 125.02, 123.79, 123.15, 116.90. **MS** (EI): C<sub>18</sub>H<sub>9</sub>D<sub>2</sub>, Exact mass: 230.10.

### 3-(vinyl-1,2-d<sub>2</sub>)aniline (**2g**)

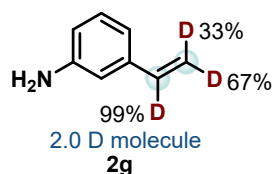

Synthesized from 3-ethynylaniline (11.7 mg, 0.10 mmol) following the general procedure for semi-deuteration, the reaction was carried out in 5 mL stainless-steel jars with stainless-steel balls (diameter 10 mm) and then milled at a frequency of 30 Hz for 60 minutes. The product was obtained and purified by flash column chromatography on silica (PE:EA = 10:1) to give 3-(vinyl-1,2-d<sub>2</sub>) aniline (**2g**) as a colorless oil (83% yield).

**<sup>1</sup>H NMR** (400 MHz, Chloroform-*d*) δ 7.12 (t, *J* = 7.8 Hz, 1H), 6.82 (d, *J* = 7.6 Hz, 1H), 6.74 (s, 1H), 6.60 (d, *J* = 7.9 Hz, 1H), 5.71-5.66 (m, 0.67H), 5.21 (d, *J* = 4.7 Hz, 0.33H), 3.85-3.46 (m, 2H). **<sup>13</sup>C NMR** (101 MHz, Chloroform-*d*) δ 146.37, 138.72, 136.98, 129.55, 117.20, 115.03, 113.63, 112.96. **HRMS** (ESI): Calcd for C<sub>18</sub>H<sub>13</sub>D<sub>3</sub>Na [M+Na]<sup>+</sup> 145.0816, found: 245.0818.

### 4-(vinyl-1,2-d<sub>2</sub>)aniline (**2h**)

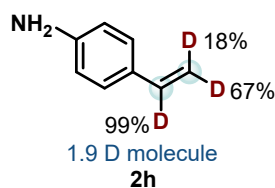

Synthesized from 4-ethynylaniline (11.7 mg, 0.10 mmol) following the general procedure for semi-deuteration, the reaction was carried out in 5 mL stainless-steel jars with stainless-steel balls (diameter 10 mm) and then milled at a frequency of 30 Hz for 60 minutes. The product was obtained and purified by flash column chromatography on silica (PE:EA = 10:1) to give 4-(vinyl-1,2-d<sub>2</sub>) aniline (**2h**) as a colorless oil (85% yield).<sup>[10]</sup>

<sup>1</sup>H NMR (400 MHz, Chloroform-*d*) δ 7.27-7.24 (m, 2H), 6.66-6.63 (m, 2H), 5.60-5.54 (m, 0.82H), 5.09-5.05 (m, 0.33H), 3.70 (s, 2H). <sup>13</sup>C NMR (101 MHz, Chloroform-*d*) δ 146.29, 136.63, 135.97, 128.65, 127.43, 127.41, 115.08, 109.55.

### Methyl-4-(vinyl-1,2-d<sub>2</sub>)benzoate(**2i**)

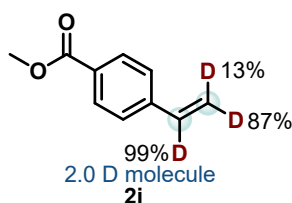

Synthesized from Methyl 4-ethynylbenzoate (11.7 mg, 0.10 mmol) following the general procedure for semi-deuteration, the reaction was carried out in 5 mL stainless-steel jars with stainless-steel balls (diameter 10 mm) and then milled at a frequency of 30 Hz for 60 minutes. The product was obtained and purified by flash column chromatography on silica (PE:EA = 10:1) to give methyl-4-(vinyl-1,2-d<sub>2</sub>)benzoate (**2i**) as a colorless oil (90% yield).<sup>[9]</sup>

<sup>1</sup>H NMR (400 MHz, Chloroform-*d*) δ 8.00-7.97 (m, 2H), 7.46-7.43 (m, 2H), 5.86-5.81 (m, 0.87H), 5.37-5.35 (m, 0.13H), 3.90 (s, 3H). <sup>13</sup>C NMR (101 MHz, Chloroform-*d*) δ 166.96, 141.94, 135.92, 129.98, 129.36, 126.18, 116.38, 52.15.

### 1-butyl-4-(vinyl-1,2-d<sub>2</sub>)benzene (2j)

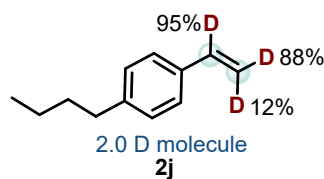

Synthesized from 1-butyl-4-ethynylbenzene (15.8 mg, 0.10 mmol) following the general procedure for semi-deuteration, the reaction was carried out in 5 mL stainless-steel jars with stainless-steel balls (diameter 10 mm) and then milled at a frequency of 30 Hz for 60 minutes. The product was obtained and purified by flash column chromatography on silica (PE) to give 1-butyl-4-(vinyl-1,2-d<sub>2</sub>)benzene (2j) as a colorless oil (75% yield).

**<sup>1</sup>H NMR** (400 MHz, Chloroform-*d*)  $\delta$  7.34 (d,  $J$  = 8.3 Hz, 2H), 7.15 (d,  $J$  = 8.2 Hz, 2H), 6.72 (d,  $J$  = 17.5 Hz, 0.05H), 5.69-5.67 (m, 0.88H), 5.18 (d,  $J$  = 5.3 Hz, 0.12H), 2.60 (t,  $J$  = 7.8 Hz, 2H), 1.62-1.55 (m, 2H), 1.38 (q,  $J$  = 7.4 Hz, 2H), 0.93 (t,  $J$  = 7.4 Hz, 3H). **<sup>13</sup>C NMR** (101 MHz, Chloroform-*d*)  $\delta$  142.84, 136.45, 135.09, 128.72, 126.23, 112.49, 35.53, 33.74, 22.48, 14.10. **MS** (EI): C<sub>12</sub>H<sub>13</sub>D<sub>2</sub>, Exact mass: 162.15.

### 1-methoxy-4-(vinyl-1,2-d<sub>2</sub>)benzene (2k)

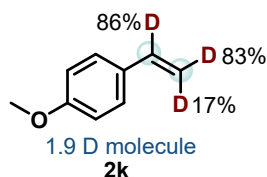

Synthesized from 1-ethynyl-4-methoxybenzene (13.2 mg, 0.10 mmol) following the general procedure for semi-deuteration, the reaction was carried out in 5 mL stainless-steel jars with stainless-steel balls (diameter 10 mm) and then milled at a frequency of 30 Hz for 60 minutes. The product was obtained and purified by flash column chromatography on silica (PE:EA = 100:1) to give 1-methoxy-4-(vinyl-1,2-d<sub>2</sub>)benzene (2k) as a colorless oil (84% yield).<sup>[10]</sup>

**<sup>1</sup>H NMR** (400 MHz, Chloroform-*d*)  $\delta$  7.36 (d,  $J$  = 8.8 Hz, 2H), 6.87 (d,  $J$  = 8.7 Hz, 2H), 6.68 (d,  $J$  = 17.4 Hz, 0.14H), 5.61-5.57 (m, 0.83H), 5.12 (d,  $J$  = 5.6 Hz, 0.17H), 3.81 (s, 3H). **<sup>13</sup>C NMR** (101 MHz, Chloroform-*d*)  $\delta$  159.45, 135.89, 130.45, 127.48, 114.00, 111.27, 55.40.

### 1,3-dimethoxy-5-(vinyl-1,2-d<sub>2</sub>)benzene (2l)

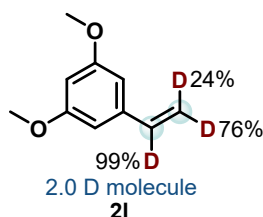

Synthesized from 1-ethynyl-3,5-dimethoxybenzene (16.2 mg, 0.10 mmol) following the general procedure for semi-deuteration, the reaction was carried out in 5 mL stainless-steel jars with stainless-steel balls (diameter 10 mm) and then milled at a frequency of 30 Hz for 60 minutes. The product was obtained and purified by flash column chromatography on silica (PE:EA = 50:1) to give 1,3-dimethoxy-5-(vinyl-1,2-d<sub>2</sub>)benzene (**2l**) as a colorless oil (71% yield).

**<sup>1</sup>H NMR** (400 MHz, Chloroform-*d*)  $\delta$  6.57 (d,  $J$  = 2.4 Hz, 2H), 6.39 (t,  $J$  = 2.3 Hz, 1H), 5.71 (t,  $J$  = 2.5 Hz, 0.76H), 5.25 (d,  $J$  = 5.9 Hz, 0.24H), 3.81 (s, 6H). **<sup>13</sup>C NMR** (101 MHz, Chloroform-*d*)  $\delta$  160.92, 160.53, 139.55, 136.77, 114.22, 104.29, 100.06, 55.42, 55.33. **HRMS** (ESI): Calcd for C<sub>10</sub>H<sub>11</sub>D<sub>2</sub>O<sub>2</sub> [M+H]<sup>+</sup> 167.1036, found: 167.1032.

### N,N-diethyl-4-(vinyl-1,2-d<sub>2</sub>)benzamide (2m)

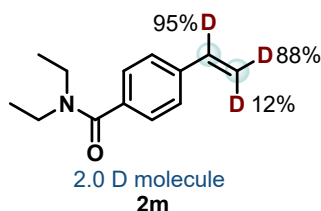

Synthesized from N,N-diethyl-4-ethynylbenzamide (20.2 mg, 0.10 mmol) following the general procedure for semi-deuteration, the reaction was carried out in 5 mL stainless-steel jars with stainless-steel balls (diameter 10 mm) and then milled at a frequency of 30 Hz for 60 minutes. The product was obtained and purified by flash column chromatography on silica (PE:EA = 50:1) to give N,N-diethyl-4-(vinyl-1,2-d<sub>2</sub>)benzamide (**2m**) as a colorless oil (88% yield).

**<sup>1</sup>H NMR** (400 MHz, Chloroform-*d*)  $\delta$  7.41 (d,  $J$  = 7.9 Hz, 2H), 7.32 (d,  $J$  = 8.0 Hz, 2H), 6.71 (d,  $J$  = 17.6 Hz, 0.05H), 5.74 (s, 0.88H), 5.27 (d,  $J$  = 5.8 Hz, 0.12H), 3.35-3.24 (d,  $J$  = 109.0 Hz, 4H), 1.20 (d,  $J$  = 45.9 Hz, 6H). **<sup>13</sup>C NMR** (101 MHz, Chloroform-*d*)  $\delta$  171.11, 138.30, 136.53, 135.99, 126.68, 126.19, 114.79, 43.33, 39.31, 14.29, 12.96. **HRMS** (ESI): Calcd for C<sub>13</sub>H<sub>16</sub>D<sub>2</sub>NO [M+H]<sup>+</sup> 206.1508, found: 206.1510.

#### 4,4-dimethyl-6-(vinyl-1,2-d<sub>2</sub>)thiochromane (2n)

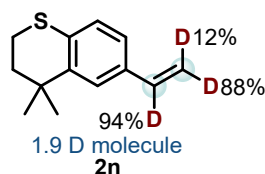

Synthesized from 6-ethynyl-4,4-dimethylthiochromane (20.2 mg, 0.10 mmol) following the general procedure for semi-deuteration, the reaction was carried out in 5 mL stainless-steel jars with stainless-steel balls (diameter 10 mm) and then milled at a frequency of 30 Hz for 60 minutes. The product was obtained and purified by flash column chromatography on silica (PE:EA = 100:1) to give 4,4-dimethyl-6-(vinyl-1,2-d<sub>2</sub>)thiochromane (**2n**) as a yellow oil (77% yield).

**<sup>1</sup>H NMR** (400 MHz, Chloroform-*d*)  $\delta$  7.37 (s, 1H), 7.15 (d, *J* = 8.2 Hz, 1H), 7.05 (d, *J* = 8.1 Hz, 1H), 6.66 (d, *J* = 17.5 Hz, 0.06H), 5.64 (s, 0.88H), 5.16 (d, *J* = 6.4 Hz, 0.12H), 3.04-3.01 (m, 2H), 1.97-1.94 (m, 2H), 1.34 (s, 6H). **<sup>13</sup>C NMR** (101 MHz, Chloroform-*d*)  $\delta$  142.06, 136.41, 133.64, 131.65, 126.83, 124.90, 123.57, 111.95, 37.77, 33.11, 30.26, 23.26. **HRMS** (ESI): Calcd for C<sub>13</sub>H<sub>14</sub>D<sub>2</sub>SNa [M+Na]<sup>+</sup> 229.0998, found: 229.1001.

#### 4-(vinyl-1,2-d<sub>2</sub>)dibenzo[b,d]furan (2o)

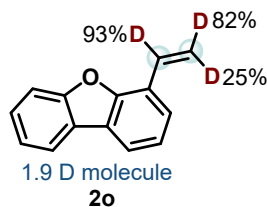

Synthesized from 4-ethynyldibenzo[b,d]furan (19.2 mg, 0.10 mmol) following the general procedure for semi-deuteration, the reaction was carried out in 5 mL stainless-steel jars with stainless-steel balls (diameter 10 mm) and then milled at a frequency of 30 Hz for 60 minutes. The product was obtained and purified by flash column chromatography on silica (PE:EA = 200:1) to give 4-(vinyl-1,2-d<sub>2</sub>)dibenzo[b,d]furan (**2o**) as a yellow oil (86% yield).

**<sup>1</sup>H NMR** (400 MHz, Chloroform-*d*)  $\delta$  7.97 (d, *J* = 7.7 Hz, 1H), 7.87 (d, *J* = 7.7 Hz, 1H), 7.63 (d, *J* = 8.3 Hz, 1H), 7.48 (q, *J* = 7.9 Hz, 2H), 7.38 (dt, *J* = 14.7, 7.5 Hz, 2H), 7.13 (d, *J* = 17.8 Hz, 0.07H), 6.27 (s, 0.75H), 5.57 (d, *J* = 4.4 Hz, 0.18H). **<sup>13</sup>C NMR** (101 MHz, Chloroform-*d*)  $\delta$  156.24, 153.83, 131.26, 127.30, 125.45, 124.72, 124.14, 122.93, 122.62, 120.80, 119.88, 117.16, 111.89. **HRMS** (ESI): Calcd for C<sub>14</sub>H<sub>9</sub>D<sub>2</sub>O [M+H]<sup>+</sup> 197.0930, found: 197.0921.

#### 4-(vinyl-1,2-d<sub>2</sub>)dibenzo[b,d]thiophene (**2p**)

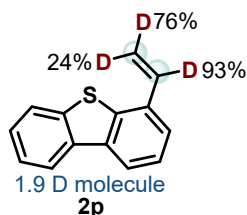

Synthesized from 4-ethynyldibenzo[b,d]thiophene (20.8 mg, 0.10 mmol) following the general procedure for semi-deuteration, the reaction was carried out in 5 mL stainless-steel jars with stainless-steel balls (diameter 10 mm) and then milled at a frequency of 30 Hz for 60 minutes. The product was obtained and purified by flash column chromatography on silica (PE:EA = 200:1) to give 4-(vinyl-1,2-d<sub>2</sub>)dibenzo[b,d]thiophene (**2p**) as a yellow oil (81% yield).

**<sup>1</sup>H NMR** (400 MHz, Chloroform-*d*)  $\delta$  8.17 (dd,  $J = 6.2, 3.0$  Hz, 1H), 8.10 (d,  $J = 7.8$  Hz, 1H), 7.90 (dd,  $J = 6.0, 3.0$  Hz, 1H), 7.59 (d,  $J = 7.5$  Hz, 1H), 7.47 (dd,  $J = 8.5, 6.1$  Hz, 3H), 7.04 (d,  $J = 15.6$  Hz, 0.07H), 6.00 (s, 0.76H), 5.54 (s, 0.24H). **<sup>13</sup>C NMR** (101 MHz, Chloroform-*d*)  $\delta$  139.27, 137.83, 136.35, 135.64, 132.54, 126.95, 124.89, 124.60, 122.85, 121.79, 120.97, 116.63. **HRMS** (ESI): Calcd for C<sub>14</sub>H<sub>9</sub>D<sub>2</sub>S [M+H]<sup>+</sup> 213.0702, found: 213.0705.

#### N,N-diphenyl-4-(vinyl-1,2-d<sub>2</sub>)aniline (**2q**)

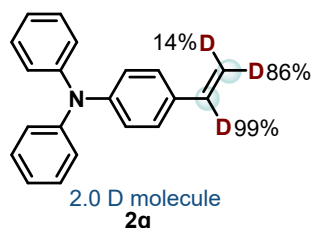

Synthesized from 4-ethynyl-N,N-diphenylaniline (27.0 mg, 0.10 mmol) following the general procedure for semi-deuteration, the reaction was carried out in 5 mL stainless-steel jars with stainless-steel balls (diameter 10 mm) and then milled at a frequency of 30 Hz for 60 minutes. The product was obtained and purified by flash column chromatography on silica (PE:EA = 100:1) to give N,N-diphenyl-4-(vinyl-1,2-d<sub>2</sub>)aniline (**2q**) as a brown solid (42% yield).

**<sup>1</sup>H NMR** (400 MHz, Chloroform-*d*)  $\delta$  7.30-7.24 (m, 6H), 7.15-7.02 (dd,  $J = 27.2, 7.7$  Hz, 8H), 5.62 (s, 0.86H), 5.16 (d,  $J = 6.0$  Hz, 0.14H). **<sup>13</sup>C NMR** (101 MHz, Chloroform-*d*)  $\delta$  147.71, 147.58, 136.22, 131.89, 129.37, 127.15, 124.48, 123.74, 123.03, 112.12. **HRMS** (ESI): Calcd for C<sub>20</sub>H<sub>16</sub>D<sub>2</sub>N [M+H]<sup>+</sup> 274.1559, found: 273.1552.

## Tert-butyl (3-(vinyl-1,2-d<sub>2</sub>)phenyl)carbamate (**2r**)

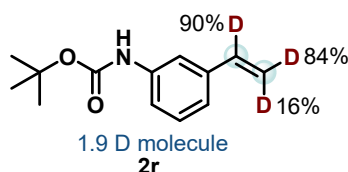

Synthesized from tert-butyl (3-ethynylphenyl) carbamate (21.8 mg, 0.10 mmol) following the general procedure for semi-deuteration, the reaction was carried out in 5 mL stainless-steel jars with stainless-steel balls (diameter 10 mm) and then milled at a frequency of 30 Hz for 60 minutes. The product was obtained and purified by flash column chromatography on silica (PE:EA = 30:1) to give tert-butyl (3-(vinyl-1,2-d<sub>2</sub>) phenyl) carbamate (**2r**) as a colorless oil (43% yield).

**<sup>1</sup>H NMR** (400 MHz, Chloroform-*d*)  $\delta$  7.46 (s, 1H), 7.24 (d, *J* = 7.2 Hz, 2H), 7.10 (d, *J* = 6.2 Hz, 1H), 6.69 (d, *J* = 17.5 Hz, 0.1H), 6.48 (s, 1H), 5.73 (s, 0.84H), 5.24 (d, *J* = 5.8 Hz, 0.16H), 1.52 (s, 9H). **<sup>13</sup>C NMR** (101 MHz, Chloroform-*d*)  $\delta$  152.84, 138.72, 138.52, 136.63, 129.22, 121.09, 118.02, 116.31, 114.29, 80.70, 28.48. **HRMS** (ESI): Calcd for C<sub>13</sub>H<sub>16</sub>D<sub>2</sub>NO<sub>2</sub> [M+H]<sup>+</sup> 222.1458, found: 222.1455.

## 1,2-diphenylethene-1,2-d<sub>2</sub> (**2s**)

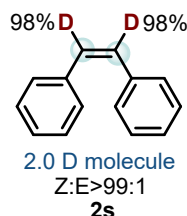

Synthesized from 1,2-diphenylethyne (17.8 mg, 0.10 mmol) following the general procedure for semi-deuteration, the reaction was carried out in 5 mL stainless-steel jars with stainless-steel balls (diameter 10 mm) and then milled at a frequency of 30 Hz for 60 minutes. The product was obtained and purified by flash column chromatography on silica (PE) to give 1,2-diphenylethene-1,2-d<sub>2</sub> (**2s**) as a white solid (79% yield).<sup>[11]</sup>

**<sup>1</sup>H NMR** (400 MHz, Chloroform-*d*)  $\delta$  7.28-7.17 (m, 10H), 6.61 (s, 0.04H). **<sup>13</sup>C NMR** (101 MHz, Chloroform-*d*)  $\delta$  137.28, 130.13, 128.99, 128.34, 127.23. **HRMS** (ESI): Calcd for C<sub>14</sub>H<sub>11</sub>D<sub>2</sub> [M+H]<sup>+</sup> 183.1137, found: 182.1133.

## 2-(2-phenylethyl-1,2-d<sub>2</sub>)aniline (**2t**)

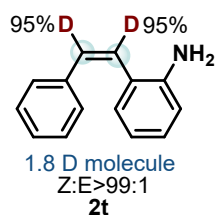

Synthesized from 2-(phenylethynyl) aniline (19.4 mg, 0.10 mmol) following the general procedure for semi-deuteration, the reaction was carried out in 5 mL stainless-steel jars with stainless-steel balls (diameter 10 mm) and then milled at a frequency of 30 Hz for 60 minutes. The product was obtained and purified by flash column chromatography on silica (PE:EA = 10:1) to give 2-(2-phenylethyl-1,2-d<sub>2</sub>) aniline (**2t**) as a colorless oil (81% yield).

**<sup>1</sup>H NMR** (400 MHz, Chloroform-*d*) δ 7.23-7.19 (m, 5H), 7.11 (t, *J* = 7.0 Hz, 2H), 6.73-6.68 (m, 2H), 6.54 (t, *J* = 6.6 Hz, 0.22H), 3.71 (s, 2H). **<sup>13</sup>C NMR** (101 MHz, Chloroform-*d*) δ 143.77, 136.70, 131.74, 131.60, 129.66, 128.82, 128.52, 128.30, 127.55, 126.57, 126.32, 123.17, 118.50, 115.61. **HRMS** (ESI): Calcd for C<sub>14</sub>H<sub>12</sub>D<sub>2</sub>N [M+H]<sup>+</sup> 198.1246, found: 198.1243.

## 5-(2-phenylvinyl-1,2-d<sub>2</sub>)benzo[d][1,3]dioxole (**2u**)

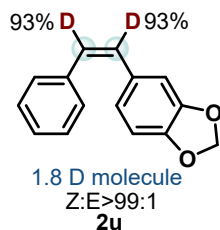

Synthesized from 5-(phenylethynyl) benzo[d][1,3] dioxole (22.2 mg, 0.10 mmol) following the general procedure for semi-deuteration, the reaction was carried out in 5 mL stainless-steel jars with stainless-steel balls (diameter 10 mm) and then milled at a frequency of 30 Hz for 60 minutes. The product was obtained and purified by flash column chromatography on silica (PE:EA = 100:1) to give 5-(2-phenylvinyl-1,2-d<sub>2</sub>)benzo[d][1,3]dioxole (**2u**) as a white solid (76% yield).

**<sup>1</sup>H NMR** (400 MHz, Chloroform-*d*) δ 7.27 (s, 2H), 7.25-7.19 (m, 3H), 6.72 (dt, *J* = 15.9, 7.9 Hz, 3H), 6.49 (d, *J* = 9.5 Hz, 0.14H), 5.92 (s, 2H). **<sup>13</sup>C NMR** (101 MHz, Chloroform-*d*) δ 147.48, 146.77, 137.36, 131.23, 129.23, 128.94, 128.41, 127.19, 123.10, 109.04, 108.32, 101.04. **HRMS** (ESI): Calcd for C<sub>15</sub>H<sub>11</sub>D<sub>2</sub>O<sub>2</sub> [M+H]<sup>+</sup> 277.1036, found: 277.1034.

### Ethenyl 3-phenylacrylate-d<sub>2</sub> (2v)

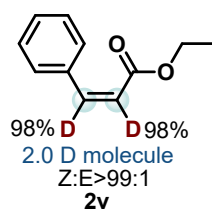

Synthesized from ethyl 3-phenylpropiolate (17.4 mg, 0.10 mmol) following the general procedure for semi-deuteration, the reaction was carried out in 5 mL stainless-steel jars with stainless-steel balls (diameter 10 mm) and then milled at a frequency of 30 Hz for 60 minutes. The product was obtained and purified by flash column chromatography on silica (PE:EA = 100:1) to give ethyl 3-phenylacrylate-d<sub>2</sub> (**2v**) as a colorless oil (61% yield).

**<sup>1</sup>H NMR** (400 MHz, Chloroform-*d*) δ 7.53-7.51 (m, 2H), 7.39-7.37 (m, 3H), 6.42 (m, 0.04H), 4.29-4.24 (q, *J* = 7.1 Hz, 2H), 1.34 (t, *J* = 7.1 Hz, 3H). **<sup>13</sup>C NMR** (101 MHz, Chloroform-*d*) δ 167.15, 144.63, 134.47, 130.35, 129.00, 128.16, 118.24, 60.63, 14.46. **HRMS** (ESI): Calcd for C<sub>11</sub>H<sub>11</sub>D<sub>2</sub>O<sub>2</sub> [M+H]<sup>+</sup> 179.1036, found: 179.1040.

### 3,5-dichloro-N-(2-methylbut-3-en-2-yl-3,4-d<sub>2</sub>)benzamide (2w)

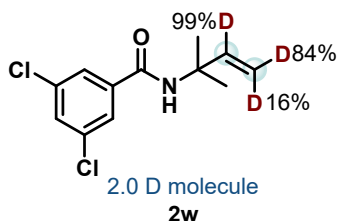

Synthesized from 3,5-dichloro-N-(2-methylbut-3-yn-2-yl)benzamide (25.6 mg, 0.10 mmol) following the general procedure for semi-deuteration, the reaction was carried out in 5 mL stainless-steel jars with stainless-steel balls (diameter 10 mm) and then milled at a frequency of 30 Hz for 120 minutes. The product was obtained and purified by flash column chromatography on silica (PE:EA = 30:1) to give 3,5-dichloro-N-(2-methylbut-3-en-2-yl-3,4-d<sub>2</sub>)benzamide (**2w**) as a white solid (37% yield).

**<sup>1</sup>H NMR** (400 MHz, Chloroform-*d*) δ 7.57 (d, *J* = 1.9 Hz, 2H), 7.44 (s, 1H), 6.04 (s, 1H), 5.19-5.14 (m, 0.84H), 5.10 (d, *J* = 4.4 Hz, 0.16H), 1.54 (s, 6H). **<sup>13</sup>C NMR** (101 MHz, Chloroform-*d*) δ 164.19, 143.23, 142.88, 138.58, 135.48, 131.18, 125.63, 112.16, 111.92, 55.21, 27.09. **HRMS** (ESI): Calcd for C<sub>12</sub>H<sub>12</sub>D<sub>2</sub>Cl<sub>2</sub>NO [M+H]<sup>+</sup> 298.0131, found: 298.0126.

### Allyl-2,3,3-d<sub>3</sub> 2-(4-((5-chloro-3-fluoropyridin-2-yl)oxy)phenoxy)propanoate(2x)

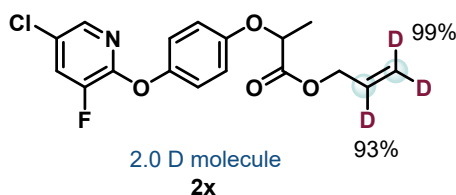

Synthesized from prop-2-yn-1-yl 2-(4-((5-chloro-3-fluoropyridin-2-yl)oxy)phenoxy)propanoate (34.9 mg, 0.10 mmol) following the general procedure for semi-deuteration, the reaction was carried out in 5 mL stainless-steel jars with stainless-steel balls (diameter 10 mm) and then milled at a frequency of 30 Hz for 120 minutes. The product was obtained and purified by flash column chromatography on silica (PE:EA = 5:1) to give allyl-2,3,3-d<sub>3</sub> 2-(4-((5-chloro-3-fluoropyridin-2-yl)oxy)phenoxy)propanoate (**2x**) as a white solid (29% yield).

**<sup>1</sup>H NMR** (400 MHz, Chloroform-*d*) δ 7.86 (s, 1H) , 7.50 (d, *J* = 12 Hz, 1H), 7.08 (d, *J* = 8Hz, 2H), 6.92 (d, *J* = 8 Hz, 2H), 5.88 (s, 0.16H), 5.31-5.24 (m, 0.99H) , 4.78-4.73 (m, 2H), 4.66 (s, 2H), 1.65-1.63 (m, 3H). **<sup>13</sup>C NMR** (101 MHz, Chloroform-*d*) δ 171.80, 154.94, 151.41, 151.30, 148.31, 147.02, 145.67, 140.20, 140.13, 131.35-130.80, 125.05, 124.98, 124.87, 122.32, 118.86-116.13, 73.16, 65.74, 18.67. **HRMS** (ESI): Calcd for C<sub>17</sub>H<sub>12</sub>D<sub>3</sub>ClNaNO<sub>4</sub> [M+Na]<sup>+</sup> 377.0752, found: 377.0754.

#### Allyl-2,3,3-d<sub>3</sub> 5-(3,5-dimethylphenoxy)-2,2-dimethylpentanoate (**2y**)

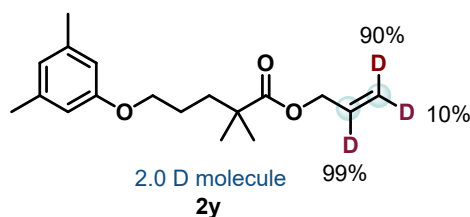

Synthesized from prop-2-yn-1-yl 5-(3,5-dimethylphenoxy)-2,2-dimethylpentanoate (28.8 mg, 0.10 mmol) following the general procedure for semi-deuteration, the reaction was carried out in 5 mL stainless-steel jars with stainless-steel balls (diameter 10 mm) and then milled at a frequency of 30 Hz for 120 minutes. The product was obtained and purified by flash column chromatography on silica (PE:EA = 30:1) to give allyl-2,3,3-d<sub>3</sub> 5-(3,5-dimethylphenoxy) -2,2-dimethylpentanoate (**2y**) as a colorless oily (68% yield).

**<sup>1</sup>H NMR** (400 MHz, Chloroform-*d*) δ 7.03 (d, *J* = 8 Hz, 1H), 6.68 (d, *J* = 4 Hz, 2H), 6.62 (s, 1H), 5.31 (s, 0.9H) 5.31 (s, 0.06H), 4.60-4.59 (m, 2H), 3.94-3.92 (m, 2H), 2.32 (s, 3H), 2.19 (s, 3H), 1.77-1.75 (m, 3H), 1.26 (m, 6H). **<sup>13</sup>C NMR** (101 MHz, Chloroform-*d*) δ 177.49, 156.97, 136.47, 132.31-131.77, 130.32, 130.03, 123.60, 120.70, 119.04, 117.71-117.20, 111.93, 67.90, 65.01, 64.94, 64.92, 42.16, 37.16, 25.22, 25.20, 21.44, 15.82. **HRMS** (ESI): Calcd for C<sub>18</sub>H<sub>24</sub>D<sub>2</sub>O<sub>3</sub>K [M+K]<sup>+</sup> 331.1639, found: 331.1634.

#### 4-(4-((allyl-2,3,3-d<sub>3</sub>)oxy)-3-methoxyphenyl)butan-2-one(2z)

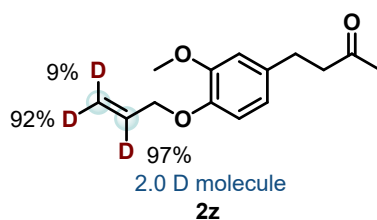

Synthesized from 4-(3-methoxy-4-(prop-2-yn-1-yloxy)phenyl)butan-2-one (23.2 mg, 0.10 mmol) following the general procedure for semi-deuteration, the reaction was carried out in 5 mL stainless-steel jars with stainless-steel balls (diameter 10 mm) and then milled at a frequency of 30 Hz for 120 minutes. The product was obtained and purified by flash column chromatography on silica (PE:EA = 50:1) to give 4-(4-((allyl-2,3,3-d<sub>3</sub>)oxy)-3-methoxyphenyl)butan-2-one (**2z**) as light yellow solid (87% yield).

**<sup>1</sup>H NMR** (400 MHz, Chloroform-*d*) δ 7.28 (d, *J* = 8 Hz, 1H), 6.72-6.67 (m, 2H), 6.05, 5.37-5.27 (m, 0.91H), 5.26 (m, 0.08H), 4.57 (s, 2H), 3.86 (s, 3H), 2.86-2.82 (m, 2H), 2.76- 2.72 (m, 2H), 2.14 (s, 3H). **<sup>13</sup>C NMR** (101 MHz, Chloroform-*d*) δ 208.18, 149.34, 146.31, 134.05, 133.50-132.83, 120.01, 117.85-117.24, 113.59, 112.07, 69.96- 69.87, 55.88, 45.38, 30.14, 29.70, 29.38. **HRMS** (ESI): Calcd for C<sub>14</sub>H<sub>17</sub>D<sub>2</sub>O<sub>3</sub> [M+H]<sup>+</sup> 273.1454, found: 273.1450.

#### 7-((allyl-2,3,3-d<sub>3</sub>)oxy)-3-(4-methoxyphenyl)-1λ<sup>3</sup>,4λ<sup>5</sup>-chromen-4-one (2aa)

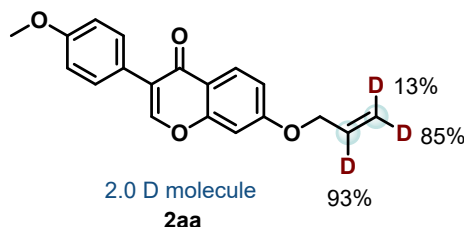

Synthesized from 3-(4-methoxyphenyl)-7-(prop-2-yn-1-yloxy)-1λ<sup>3</sup>,4λ<sup>5</sup>-chromen-4-one (30.6 mg, 0.10 mmol) following the general procedure for semi-deuteration, the reaction was carried out in 5 mL stainless-steel jars with stainless-steel balls (diameter 10 mm) and then milled at a frequency of 30 Hz for 120 minutes. The product was obtained and purified by flash column chromatography on silica (PE:EA = 3:1) to give 7-((allyl-2,3,3-d<sub>3</sub>)oxy)-3-(4-methoxyphenyl)-1λ<sup>3</sup>,4λ<sup>5</sup>-chromen-4-one (**2aa**) as light yellow solid (75% yield).

**<sup>1</sup>H NMR** (400 MHz, Chloroform-*d*) δ 8.22 (d, *J* = 12 Hz, 1H), 7.91 (s, 1H), 7.50-7.48 (m, 2H), 7.02-6.95 (m, 3H), 6.86 (d, *J* = 4 Hz, 1H), 6.06 (m, 0.07H), 5.45 (m, 0.87H), 5.36 (m, 0.15H), 4.63 (s, 2H), 3.84 (s, 3H). **<sup>13</sup>C NMR** (101 MHz, Chloroform-*d*) δ 175.88, 162.88, 159.57, 157.86, 152.10, 131.99-131.44, 130.15, 127.83, 124.87, 124.23, 118.50-117.95, 114.93, 113.97, 101.03, 69.21, 55.36. **HRMS** (ESI): Calcd for C<sub>19</sub>H<sub>15</sub>D<sub>2</sub>O<sub>4</sub> [M+H]<sup>+</sup> 311.1247, found: 311.1244.

#### 1-(((1S,2R,5S)-2-isopropyl-5-methylcyclohexyl)oxy)methyl)-4-((Z)-2-phenylvinyl-1,2-d<sub>2</sub>)benzene(2ab)

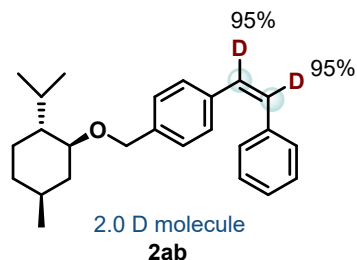

Synthesized from 1-(((1S,2R,5S)-2-isopropyl-5-methylcyclohexyl)oxy)methyl)-4-(phenylethynyl)benzene (35.0 mg, 0.10 mmol) following the general procedure for semi-deuteration, the reaction was carried out in 5 mL stainless-steel jars with stainless-steel balls (diameter 10 mm) and then milled at a frequency of 30 Hz for 120 minutes. The product was obtained and purified by flash column chromatography on silica (PE:EA = 30:1) to give 1-(((1S,2R,5S)-2-isopropyl-5-methyl cyclohexyl)oxy) methyl)-4-((Z)-2-phenylvinyl-1,2-d<sub>2</sub>) benzene (**2ab**) as light yellow oily (78% yield).

**<sup>1</sup>H NMR** (400 MHz, Chloroform-*d*) δ 7.38-7.32 (m, 2H), 7.30-7.29 (m, 2H), 7.26-7.24 (m, 7H), 6.62 (s, 0.10H), 4.72 (q, 1H), 4.41 (q, 1H), 3.24, 3.22-3.19 (m, 1H), 2.33 (m, 1H), 2.21-2.20 (m, 1H), 1.72-1.65 (m, 2H), 1.44-1.30 (m, 2H), 1.29-0.89 (m, 9H), 0.77-0.67 (m, 3H). **<sup>13</sup>C NMR** (101 MHz, Chloroform-*d*) δ 139.49, 137.98, 137.21, 136.32, 131.63, 130.00, 129.94, 128.85, 128.24, 127.84, 127.74, 127.10, 123.35, 122.25, 89.47, 78.93, 78.69, 70.22, 48.36, 48.33, 40.32, 34.60, 34.58, 31.60, 25.58, 25.51, 23.27, 23.25, 22.43, 21.08, 16.13, 16.08. **HRMS** (ESI): Calcd for C<sub>25</sub>H<sub>30</sub>D<sub>2</sub>ONa [M+Na]<sup>+</sup> 373.2471, found: 373.2469.

#### 4-(ethyl-1,1,2,2-d<sub>4</sub>)-1,1'-biphenyl (**3a**)

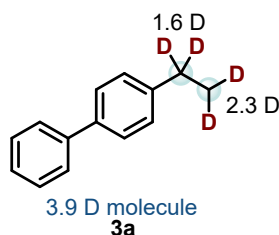

Synthesized from 4-ethynyl-1,1'-biphenyl (17.8 mg, 0.10 mmol) following the general procedure for tetra-deuteration, the reaction was carried out in 5 mL stainless-steel jars with stainless-steel balls (diameter 10 mm) and then milled at a frequency of 30 Hz for 60 minutes. The product was obtained and purified by flash column chromatography on silica (PE) to give 4-(ethyl-1,1,2,2-d<sub>4</sub>)-1,1'-biphenyl (**3a**) as a white solid (97% yield).<sup>[1a]</sup>

**<sup>1</sup>H NMR** (400 MHz, Chloroform-*d*) δ 7.65 (d, *J* = 7.2 Hz, 2H), 7.59 (d, *J* = 8.1 Hz, 2H), 7.49 (t, *J* = 7.7 Hz, 2H), 7.37 (dd, *J* = 21.7, 7.6 Hz, 3H), 2.72 (d, *J* = 7.0 Hz, 0.39H), 1.31 (t, *J* = 7.3 Hz, 0.70H). **<sup>13</sup>C NMR** (101 MHz, Chloroform-*d*) δ 143.45, 141.31, 138.72, 128.84, 128.42, 127.21, 127.14, 127.09, 28.39, 15.37.

### 4-(ethyl-d<sub>5</sub>)-1,1'-biphenyl (**3b**)

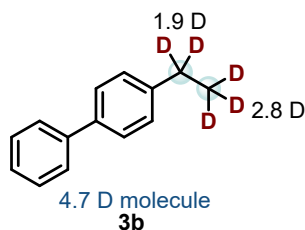

Synthesized from 4-(ethynyl-d)-1,1'-biphenyl (18.7 mg, 0.10 mmol) following the general procedure for tetra-deuteration, the reaction was carried out in 5 mL stainless-steel jars with stainless-steel balls (diameter 10 mm) and then milled at a frequency of 30 Hz for 60 minutes. The product was obtained and purified by flash column chromatography on silica (PE) to give 4-(ethyl-d<sub>5</sub>)-1,1'-biphenyl (**3b**) as a white solid (94% yield).<sup>[1a]</sup>

**<sup>1</sup>H NMR** (400 MHz, Chloroform-*d*)  $\delta$  7.63 (dd,  $J = 8.1, 1.7$  Hz, 2H), 7.57 (dd,  $J = 8.3, 2.0$  Hz, 2H), 7.47 (td,  $J = 7.7, 1.9$  Hz, 2H), 7.35 (ddd,  $J = 22.4, 7.8, 1.8$  Hz, 3H). 2.71 (m, 0.15H), 1.28 (m, 0.19H). **<sup>13</sup>C NMR** (101 MHz, Chloroform-*d*)  $\delta$  143.45, 141.32, 138.72, 128.84, 128.42, 127.21, 127.15, 127.09, 27.88, 15.0.

### 4-ethyl-4'-(ethyl-1,1,2,2-d<sub>4</sub>)-1,1'-biphenyl (**3c**)

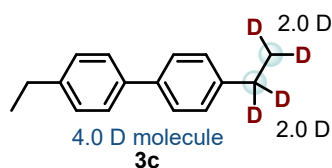

Synthesized from 4-ethyl-4'-ethynyl-1,1'-biphenyl (20.6 mg, 0.10 mmol) following the general procedure for tetra-deuteration, the reaction was carried out in 5 mL stainless-steel jars with stainless-steel balls (diameter 10 mm) and then milled at a frequency of 30 Hz for 60 minutes. The product was obtained and purified by flash column chromatography on silica (PE) to give 4-ethyl-4'-(ethyl-1,1,2,2-d<sub>4</sub>)-1,1'-biphenyl (**3c**) as a white solid (99% yield).

**<sup>1</sup>H NMR** (400 MHz, Chloroform-*d*)  $\delta$  7.53 (d,  $J = 8.1$  Hz, 4H), 7.28 (d,  $J = 7.9$  Hz, 4H), 2.71 (q,  $J = 7.6$  Hz, 2H), 1.31-1.28 (m, 4H). **<sup>13</sup>C NMR** (101 MHz, Chloroform-*d*)  $\delta$  143.18, 143.12, 138.70, 128.37, 127.06, 28.64, 28.04, 15.74, 15.08. **MS** (EI): C<sub>16</sub>H<sub>14</sub>D<sub>4</sub>, Exact mass: 214.10.

## 2-(ethyl-1,1,2,2-d<sub>4</sub>)naphthalene (3d)

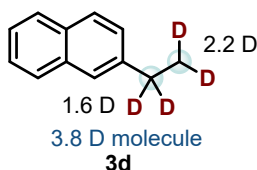

Synthesized from 2-ethynyl naphthalene (15.2 mg, 0.10 mmol) following the general procedure for tetra-deuteration, the reaction was carried out in 5 mL stainless-steel jars with stainless-steel balls (diameter 10 mm) and then milled at a frequency of 30 Hz for 60 minutes. The product was obtained and purified by flash column chromatography on silica (PE) to give 2-(ethyl-1,1,2,2-d<sub>4</sub>) naphthalene (**3d**) as a colorless oil (89% yield).<sup>[1a]</sup>

<sup>1</sup>H NMR (400 MHz, Chloroform-*d*) δ 7.90-7.78 (m, 3H), 7.67 (s, 1H), 7.48 (p, *J* = 7.1 Hz, 2H), 7.40 (d, *J* = 8.4 Hz, 1H), 2.83 (d, *J* = 7.0 Hz, 0.40H), 1.34 (d, *J* = 7.0 Hz, 0.80H). <sup>13</sup>C NMR (101 MHz, Chloroform-*d*) δ 141.84, 133.81, 132.04, 127.92, 127.73, 127.54, 127.21, 125.95, 125.66, 125.13, 28.86, 15.32.

## 9-(ethyl-1,1,2,2-d<sub>4</sub>)phenanthrene (3e)

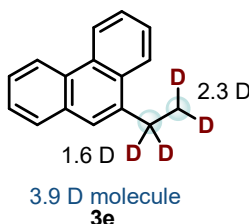

Synthesized from 9-ethynylphenanthrene (20.2 mg, 0.10 mmol) following the general procedure for tetra-deuteration, the reaction was carried out in 5 mL stainless-steel jars with stainless-steel balls (diameter 10 mm) and then milled at a frequency of 30 Hz for 60 minutes. The product was obtained and purified by flash column chromatography on silica (PE:EA = 200:1) to give 9-(ethyl-1,1,2,2-d<sub>4</sub>)phenanthrene (**3e**) as a white solid (86% yield).

<sup>1</sup>H NMR (400 MHz, Chloroform-*d*) δ 8.78-8.76 (m, 1H), 8.69 (d, *J* = 6.6 Hz, 1H), 8.18-8.10 (m, 1H), 7.90-7.85 (m, 1H), 7.71-7.59 (m, 5H), 3.16 (d, *J* = 7.2 Hz, 0.39H), 1.45 (d, *J* = 6.8 Hz, 0.76H). <sup>13</sup>C NMR (101 MHz, Chloroform-*d*) δ 138.30, 132.17, 131.39, 130.73, 129.69, 128.17, 126.68, 126.60, 126.21, 125.97, 125.04, 124.42, 123.32, 122.56, 25.87, 14.16. MS (EI): C<sub>16</sub>H<sub>10</sub>D<sub>4</sub>, Exact mass: 210.05.

### 1-(ethyl-1,1,2,2-d<sub>4</sub>)pyrene (3f)

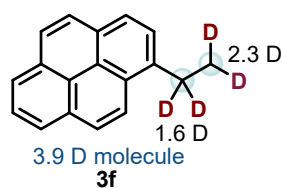

Synthesized from 6-ethynyl-1,5-dihydropyrene (22.8 mg, 0.10 mmol) following the general procedure for tetra-deuteration, the reaction was carried out in 5 mL stainless-steel jars with stainless-steel balls (diameter 10 mm) and then milled at a frequency of 30 Hz for 60 minutes. The product was obtained and purified by flash column chromatography on silica (PE:EA = 200:1) to give 1-(ethyl-1,1,2,2-d<sub>4</sub>)pyrene (**3f**) as a yellow solid (83% yield).

**<sup>1</sup>H NMR** (400 MHz, Chloroform-*d*) δ 8.31 (d, *J* = 9.2 Hz, 1H), 8.21-7.97 (m, 7H), 7.90 (d, *J* = 7.8 Hz, 1H), 3.37 (d, *J* = 7.6 Hz, 0.34H), 1.46 (d, *J* = 6.8 Hz, 0.73H). **<sup>13</sup>C NMR** (101 MHz, Chloroform-*d*) δ 138.62, 131.54, 131.04, 129.77, 128.48, 127.64, 127.23, 126.57, 126.46, 125.85, 125.16, 125.13, 125.05, 124.87, 124.73, 123.44, 26.30, 15.86. **MS** (EI): C<sub>18</sub>H<sub>10</sub>D<sub>4</sub>, Exact mass: 234.10.

### 3-(ethyl-1,1,2,2-d<sub>4</sub>)aniline (3g)

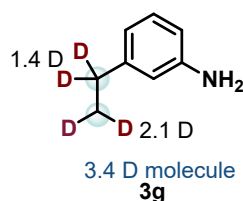

Synthesized from 3-ethynylaniline (11.7 mg, 0.10 mmol) following the general procedure for tetra-deuteration, the reaction was carried out in 5 mL stainless-steel jars with stainless-steel balls (diameter 10 mm) and then milled at a frequency of 30 Hz for 60 minutes. The product was obtained and purified by flash column chromatography on silica (PE:EA = 10:1) to give 3-(ethyl-1,1,2,2-d<sub>4</sub>)aniline (**3g**) as a colorless oil (94% yield).

**<sup>1</sup>H NMR** (400 MHz, Chloroform-*d*) δ 7.08 (t, *J* = 7.7 Hz, 1H), 6.62 (d, *J* = 7.5 Hz, 1H), 6.56-6.50 (m, 2H), 3.60 (s, 2H), 2.53 (d, *J* = 6.6 Hz, 0.68H), 1.19 (d, *J* = 7.4 Hz, 0.90H). **<sup>13</sup>C NMR** (101 MHz, Chloroform-*d*) δ 146.44, 145.65, 129.34, 118.42, 114.88, 112.66, 28.88, 15.15. **HRMS** (ESI): Calcd for C<sub>8</sub>H<sub>7</sub>ND<sub>4</sub> [M+H]<sup>+</sup> 126.1215, found: 126.1211.

### 4-(ethyl-1,1,2,2-d<sub>4</sub>)aniline (**3h**)

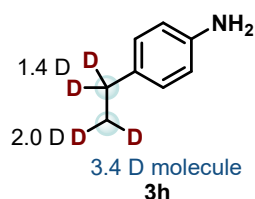

Synthesized from 4-ethynylaniline (12.5 mg, 0.10 mmol) following the general procedure for tetra-deuteration, the reaction was carried out in 5 mL stainless-steel jars with stainless-steel balls (diameter 10 mm) and then milled at a frequency of 30 Hz for 60 minutes. The product was obtained and purified by flash column chromatography on silica (PE:EA = 10:1) to give 4-(ethyl-1,1,2,2-d<sub>4</sub>)aniline (**3h**) as a colorless oil (81% yield).

**<sup>1</sup>H NMR** (400 MHz, Chloroform-*d*)  $\delta$  7.03-6.99 (m, 2H), 6.66-6.63 (m, 2H), 3.40 (s, 2H), 2.54 (m, 0.64H), 1.18 (q, *J* = 7.3 Hz, 1.03H). **<sup>13</sup>C NMR** (101 MHz, Chloroform-*d*)  $\delta$  144.14, 134.53, 128.69, 115.40, 28.00, 15.86. **HRMS** (ESI): Calcd for C<sub>8</sub>H<sub>8</sub>ND<sub>4</sub> [M+H]<sup>+</sup> 126.1215, found: 126.1211.

### methyl 4-(ethyl-1,1,2,2-d<sub>4</sub>)benzoate (**3i**)

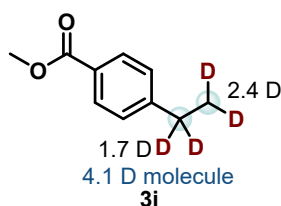

Synthesized from methyl 4-ethynylbenzoate (12.5 mg, 0.10 mmol) following the general procedure for tetra-deuteration, the reaction was carried out in 5 mL stainless-steel jars with stainless-steel balls (diameter 10 mm) and then milled at a frequency of 30 Hz for 60 minutes. The product was obtained and purified by flash column chromatography on silica (PE:EA = 10:1) to give methyl 4-(ethyl-1,1,2,2-d<sub>4</sub>)benzoate (**3i**) as a white solid (93% yield).<sup>[12]</sup>

**<sup>1</sup>H NMR** (400 MHz, Chloroform-*d*)  $\delta$  7.97-7.94 (m, 2H), 7.26-7.24 (m, 2H), 3.90 (s, 3H), 2.67(t, *J* = 7.2Hz, 0.30H), 1.21 (dd, *J* = 15.6, 8.3 Hz, 0.59H). **<sup>13</sup>C NMR** (101 MHz, Chloroform-*d*)  $\delta$  167.30, 149.79, 129.80, 127.98, 127.74, 52.03, 28.65, 14.85.

### 1-butyl-4-(ethyl-1,1,2,2-d<sub>4</sub>)benzene (3j)

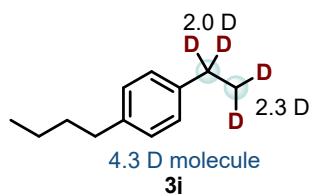

Synthesized from 1-butyl-4-ethynylbenzene (15.8 mg, 0.10 mmol) following the general procedure for tetra-deuteration, the reaction was carried out in 5 mL stainless-steel jars with stainless-steel balls (diameter 10 mm) and then milled at a frequency of 30 Hz for 60 minutes. The product was obtained and purified by flash column chromatography on silica (PE) to give 1-butyl-4-(ethyl-1,1,2,2-d<sub>4</sub>)benzene (**3j**) as a colorless oil (74% yield).<sup>[1a]</sup>

**<sup>1</sup>H NMR** (400 MHz, Chloroform-*d*)  $\delta$  7.15 (s, 4H), 2.63 (t,  $J = 7.8$  Hz, 2H), 1.64 (p,  $J = 7.5$  Hz, 2H), 1.40 (dt,  $J = 14.6, 7.4$  Hz, 2H), 1.23 (d,  $J = 5.3$  Hz, 0.7H), 0.97 (t,  $J = 7.3$  Hz, 3H). **<sup>13</sup>C NMR** (101 MHz, Chloroform-*d*)  $\delta$  141.45, 140.22, 128.47, 127.83, 35.39, 33.94, 28.33, 22.56, 15.55, 14.13.

### 1-(ethyl-1,1,2,2-d<sub>4</sub>)-4-methoxybenzene (3k)

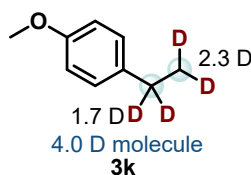

Synthesized from 1-ethynyl-4-methoxybenzene (13.2 mg, 0.10 mmol) following the general procedure for tetra-deuteration, the reaction was carried out in 5 mL stainless-steel jars with stainless-steel balls (diameter 10 mm) and then milled at a frequency of 30 Hz for 60 minutes. The product was obtained and purified by flash column chromatography on silica (PE:EA = 100:1) to give 1-(ethyl-1,1,2,2-d<sub>4</sub>)-4-methoxybenzene (**3k**) as a colorless oil (79% yield).

**<sup>1</sup>H NMR** (400 MHz, Chloroform-*d*)  $\delta$  7.13 (d,  $J = 8.5$  Hz, 2H), 6.84 (d,  $J = 8.5$  Hz, 2H), 3.80 (s, 3H), 2.57 (d,  $J = 7.2$  Hz, 0.34H), 1.17 (d,  $J = 7.0$  Hz, 0.68H). **<sup>13</sup>C NMR** (101 MHz, Chloroform-*d*)  $\delta$  157.71, 136.46, 128.84, 113.83, 55.40, 27.97, 15.49. **HRMS** (ESI): Calcd for C<sub>9</sub>H<sub>8</sub>D<sub>4</sub>OK [M+K]<sup>+</sup> 179.0771, found: 179.0772.

#### 4-(ethyl-1,1,2,2-d<sub>4</sub>)-N,N-dimethylaniline(**3l**)

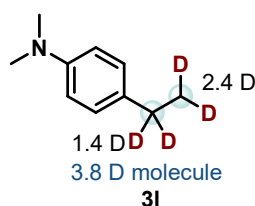

Synthesized from 4-ethynyl-N,N-dimethylaniline (14.5 mg, 0.10 mmol) following the general procedure for tetra-deuteration, the reaction was carried out in 5 mL stainless-steel jars with stainless-steel balls (diameter 10 mm) and then milled at a frequency of 30 Hz for 60 minutes. The product was obtained and purified by flash column chromatography on silica (PE:EA = 100:1) to give 4-(ethyl-1,1,2,2-d<sub>4</sub>)-N,N-dimethylaniline(**3l**) as a colorless oil (82% yield).

**<sup>1</sup>H NMR** (400 MHz, Chloroform-*d*)  $\delta$  7.12-7.10 (m, 2H), 6.75-6.73 (m, 2H), 2.94 (s, 6H), 2.57 (d,  $J$  = 7.2 Hz, 0.37H), 1.19 (d,  $J$  = 7.0 Hz, 0.63H). **<sup>13</sup>C NMR** (101 MHz, Chloroform-*d*)  $\delta$  149.11, 132.77, 128.53, 113.32, 41.16, 27.60, 15.68. **HRMS** (ESI): Calcd for C<sub>10</sub>H<sub>12</sub>D<sub>4</sub>N [M+H]<sup>+</sup> 154.1228, found: 154.1522.

#### 1-(ethyl-1,1,2,2-d<sub>4</sub>)-3,5-dimethoxybenzene (**3m**)

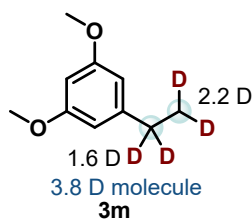

Synthesized from 1-ethynyl-3,5-dimethoxybenzene (16.2 mg, 0.10 mmol) following the general procedure for tetra-deuteration, the reaction was carried out in 5 mL stainless-steel jars with stainless-steel balls (diameter 10 mm) and then milled at a frequency of 30 Hz for 60 minutes. The product was obtained and purified by flash column chromatography on silica (PE:EA = 50:1) to give 1-(ethyl-1,1,2,2-d<sub>4</sub>)-3,5-dimethoxybenzene (**3m**) as a colorless oil (78% yield).

**<sup>1</sup>H NMR** (400 MHz, Chloroform-*d*)  $\delta$  6.38 (d,  $J$  = 2.3 Hz, 2H), 6.31 (t,  $J$  = 2.3 Hz, 1H), 3.79 (s, 6H), 2.58 (d,  $J$  = 7.1 Hz, 0.4H), 1.19 (d,  $J$  = 7.1 Hz, 0.8H). **<sup>13</sup>C NMR** (101 MHz, Chloroform-*d*)  $\delta$  160.86, 146.80, 106.01, 97.63, 55.34, 28.91, 15.20. **HRMS** (ESI): Calcd for C<sub>10</sub>H<sub>11</sub>D<sub>4</sub>O<sub>2</sub> [M+H]<sup>+</sup> 171.1318, found: 171.1314.

### N,N-diethyl-4-(ethyl-1,1,2,2-d<sub>4</sub>) benzamide (3n)

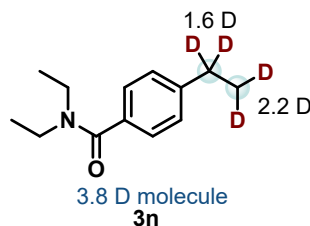

Synthesized from N,N-diethyl-4-ethynylbenzamide (20.2 mg, 0.10 mmol) following the general procedure for tetra-deuteration, the reaction was carried out in 5 mL stainless-steel jars with stainless-steel balls (diameter 10 mm) and then milled at a frequency of 30 Hz for 60 minutes. The product was obtained and purified by flash column chromatography on silica (PE:EA = 50:1) to give N,N-diethyl-4-(ethyl-1,1,2,2-d<sub>4</sub>)benzamide (**3n**) as a colorless oil (91% yield).

**<sup>1</sup>H NMR** (400 MHz, Chloroform-*d*)  $\delta$  7.29 (d,  $J$  = 7.8 Hz, 2H), 7.20 (d,  $J$  = 7.8 Hz, 2H), 3.40 (d,  $J$  = 104.9 Hz, 4H), 2.63 (d,  $J$  = 7Hz, 0.35H), 1.26 (d,  $J$  = 10Hz, 0.85H), 1.24-1.08 (m, 6H). **<sup>13</sup>C NMR** (101 MHz, Chloroform-*d*)  $\delta$  171.53, 145.32, 145.31, 134.56, 127.83, 126.39, 77.31, 43.30, 39.20, 28., 15.09, 14.25, 12.92. **HRMS** (ESI): Calcd for C<sub>13</sub>H<sub>16</sub>D<sub>4</sub>ON [M+H]<sup>+</sup> 210.1790, found: 210.1789.

### N,N-diethyl-4-(ethyl-1,1,2,2-d<sub>4</sub>)benzenesulfonamide (3o)

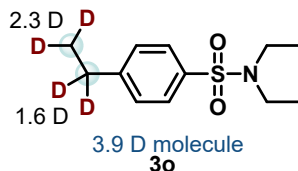

Synthesized from N,N-diethyl-4-ethynylbenzenesulfonamide (23.7 mg, 0.10 mmol) following the general procedure for tetra-deuteration, the reaction was carried out in 5 mL stainless-steel jars with stainless-steel balls (diameter 10 mm) and then milled at a frequency of 30 Hz for 60 minutes. The product was obtained and purified by flash column chromatography on silica (PE:EA = 100 : 1) to give N,N-diethyl-4-(ethyl-1,1,2,2-d<sub>4</sub>)benzenesulfonamide (**3o**) as a white solid (90% yield).

**<sup>1</sup>H NMR** (400 MHz, Chloroform-*d*)  $\delta$  7.70 (d,  $J$  = 8.3 Hz, 2H), 7.29 (d,  $J$  = 8.3 Hz, 2H), 3.22 (q,  $J$  = 7.1 Hz, 4H), 2.67 (d,  $J$  = 6.9 Hz, 0.39H), 1.20 (d,  $J$  = 6.9 Hz, 0.67H), 1.12 (t,  $J$  = 7.1 Hz, 6H). **<sup>13</sup>C NMR** (101 MHz, Chloroform-*d*)  $\delta$  149.12, 137.58, 128.54, 127.21, 42.15, 28.35, 14.30. **HRMS** (ESI): Calcd for C<sub>12</sub>H<sub>16</sub>D<sub>4</sub>O<sub>2</sub>NS [M+H]<sup>+</sup> 246.1460, found: 246.1457.

### 6-(ethyl-1,1,2,2-d<sub>4</sub>)-4,4-dimethylthiochromane (3p)

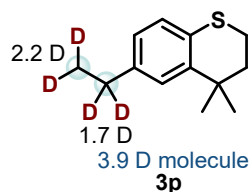

Synthesized from 6-ethynyl-4,4-dimethylthiochromane (20.2 mg, 0.10 mmol) following the general procedure for tetra-deuteration, the reaction was carried out in 5 mL stainless-steel jars with stainless-steel balls (diameter 10 mm) and then milled at a frequency of 30 Hz for 60 minutes. The product was obtained and purified by flash column chromatography on silica (PE:EA = 100:1) to give 6-(ethyl-1,1,2,2-d<sub>4</sub>)-4,4-dimethylthiochromane (**3p**) as a yellow oil (81% yield).

**<sup>1</sup>H NMR** (400 MHz, Chloroform-*d*)  $\delta$  7.18 (s, 1H), 7.01 (d,  $J = 8.4$  Hz, 1H), 6.89 (d,  $J = 8.1$  Hz, 1H), 3.02 (s, 2H), 2.55 (d,  $J = 6.8$  Hz, 0.28H), 1.96 (t,  $J = 6.1$  Hz, 2H), 1.33 (s, 6H), 1.16 (d,  $J = 6.3$  Hz, 0.82H). **<sup>13</sup>C NMR** (101 MHz, Chloroform-*d*)  $\delta$  141.91, 140.07, 128.39, 126.59, 126.22, 125.81, 38.08, 33.12, 30.45, 28.26, 23.18, 15.41. **HRMS** (ESI): Calcd for C<sub>13</sub>H<sub>15</sub>D<sub>4</sub>S [M+H]<sup>+</sup> 207.1171, found: 207.1170.

### 4-(ethyl-1,1,2,2-d<sub>4</sub>) dibenzo[b,d]furan (3q)

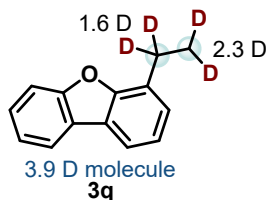

Synthesized from 4-ethynyldibenzo[b,d]furan (19.2 mg, 0.10 mmol) following the general procedure for tetra-deuteration, the reaction was carried out in 5 mL stainless-steel jars with stainless-steel balls (diameter 10 mm) and then milled at a frequency of 30 Hz for 60 minutes. The product was obtained and purified by flash column chromatography on silica (PE:EA = 200:1) to give 4-(ethyl-1,1,2,2-d<sub>4</sub>)dibenzo[b,d]furan (**3q**) as a yellow oil (87% yield).

**<sup>1</sup>H NMR** (400 MHz, Chloroform-*d*)  $\delta$  7.98 (d,  $J = 7.7$  Hz, 1H), 7.82 (dd,  $J = 6.2, 2.8$  Hz, 1H), 7.63 (d,  $J = 8.2$  Hz, 1H), 7.48 (t,  $J = 7.8$  Hz, 1H), 7.39-7.28 (m, 3H), 3.03 (d,  $J = 7.6$  Hz, 0.41H), 1.39 (d,  $J = 6.9$  Hz, 0.72H). **<sup>13</sup>C NMR** (101 MHz, Chloroform-*d*)  $\delta$  156.13, 154.74, 128.22, 127.00, 126.58, 124.74, 123.86, 122.89, 122.63, 120.78, 118.18, 111.76, 22.89, 14.14. **HRMS** (ESI): Calcd for C<sub>14</sub>H<sub>8</sub>D<sub>4</sub>ONa [M+Na]<sup>+</sup> 219.0749, found: 219.0749.

#### 4-(ethyl-1,1,2,2-d<sub>4</sub>) dibenzo[b,d]thiophene (3r)

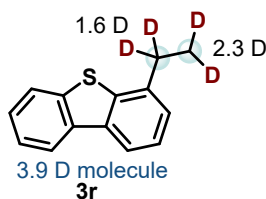

Synthesized from 4-ethynyldibenzo[b,d]thiophene (20.8 mg, 0.10 mmol) following the general procedure for tetra-deuteration, the reaction was carried out in 5 mL stainless-steel jars with stainless-steel balls (diameter 10 mm) and then milled at a frequency of 30 Hz for 60 minutes. The product was obtained and purified by flash column chromatography on silica (PE:EA = 200:1) to give 4-(ethyl-1,1,2,2-d<sub>4</sub>)dibenzo[b,d]thiophene (**3r**) as a yellow oil (84% yield).

**<sup>1</sup>H NMR** (400 MHz, Chloroform-*d*) δ 8.15 (dd, *J* = 5.9, 3.3 Hz, 1H), 8.02 (d, *J* = 7.8 Hz, 1H), 7.88 (dd, *J* = 5.9, 3.2 Hz, 1H), 7.50-7.41 (m, 3H), 7.31 (d, *J* = 7.3 Hz, 1H), 2.91 (d, *J* = 7.1 Hz, 0.42H), 1.38 (d, *J* = 6.7 Hz, 0.66H). **<sup>13</sup>C NMR** (101 MHz, Chloroform-*d*) δ 139.26, 139.02, 138.36, 136.33, 135.68, 126.68, 125.35, 125.01, 124.43, 122.94, 121.84, 119.30, 27.50, 13.16. **HRMS** (ESI): Calcd for C<sub>14</sub>H<sub>9</sub>D<sub>4</sub>S [M+H]<sup>+</sup> 217.0984, found: 217.0975.

#### 4-(ethyl-1,1,2,2-d<sub>4</sub>)-N,N-diphenylaniline (3s)

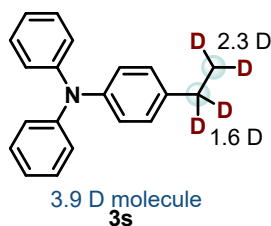

Synthesized from 4-ethynyl-N,N-diphenylaniline (27.0 mg, 0.10 mmol) following the general procedure for tetra-deuteration, the reaction was carried out in 5 mL stainless-steel jars with stainless-steel balls (diameter 10 mm) and then milled at a frequency of 30 Hz for 60 minutes. The product was obtained and purified by flash column chromatography on silica (PE:EA = 100:1) to give 4-(ethyl-1,1,2,2-d<sub>4</sub>)-N,N-diphenylaniline (**3s**) as a brown solid (63% yield).

**<sup>1</sup>H NMR** (400 MHz, Chloroform-*d*) δ 7.26-7.19 (m, 4H), 7.12-6.95 (m, 10H), 2.60 (d, *J* = 7.3 Hz, 0.36H), 1.21 (d, *J* = 7.0 Hz, 0.65H). **<sup>13</sup>C NMR** (101 MHz, Chloroform-*d*) δ 148.15, 145.49, 139.12, 129.23, 128.78, 124.94, 123.78, 122.35, 28.03, 15.04. **HRMS** (ESI): Calcd for C<sub>20</sub>H<sub>15</sub>D<sub>4</sub>NK [M+K]<sup>+</sup> 316.2769, found: 316.2764.

### tert-butyl (3-(ethyl-1,1,2,2-d<sub>4</sub>)phenyl)carbamate (**3t**)

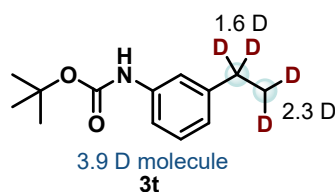

Synthesized from tert-butyl (3-ethynylphenyl)carbamate (21.8 mg, 0.10 mmol) following the general procedure for tetra-deuteration, the reaction was carried out in 5 mL stainless-steel jars with stainless-steel balls (diameter 10 mm) and then milled at a frequency of 30 Hz for 60 minutes. The product was obtained and purified by flash column chromatography on silica (PE:EA = 30:1) to give tert-butyl (3-(ethyl-1,1,2,2-d<sub>4</sub>)phenyl)carbamate (**3t**) as a colorless oil (44% yield).

**<sup>1</sup>H NMR** (400 MHz, Chloroform-*d*)  $\delta$  7.21 (s, 1H), 7.17 (t,  $J = 7.8$  Hz, 1H), 7.11 (d,  $J = 8.2$  Hz, 1H), 6.88 (d,  $J = 7.5$  Hz, 1H), 6.51 (s, 1H), 2.59 (d,  $J = 7.1$  Hz, 0.42H), 1.52 (s, 9H), 1.18 (d,  $J = 6.9$  Hz, 0.70H). **<sup>13</sup>C NMR** (101 MHz, Chloroform-*d*)  $\delta$  152.93, 145.35, 138.41, 128.95, 122.72, 118.13, 115.95, 80.48, 28.56, 28.46, 15.11. **HRMS** (ESI): Calcd for C<sub>13</sub>H<sub>15</sub>D<sub>4</sub>NO<sub>2</sub>K [M+K]<sup>+</sup> 264.1298, found: 264.1295.

### 1,2-diphenylethane-1,1,2,2-d<sub>4</sub> (**3u**)

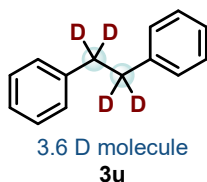

Synthesized from 1,2-diphenylethyne (17.8 mg, 0.10 mmol) following the general procedure for tetra-deuteration, the reaction was carried out in 5 mL stainless-steel jars with stainless-steel balls (diameter 10 mm) and then milled at a frequency of 30 Hz for 60 minutes. The product was obtained and purified by flash column chromatography on silica (PE) to give 1,2-diphenylethane-1,1,2,2-d<sub>4</sub> (**3u**) as a white solid (91% yield).<sup>[12]</sup>

**<sup>1</sup>H NMR** (400 MHz, Chloroform-*d*)  $\delta$  7.35 (t,  $J = 7.6$  Hz, 4H), 7.30-7.22 (m, 6H), 2.97 (d,  $J = 5.8$  Hz, 0.45H). **<sup>13</sup>C NMR** (101 MHz, Chloroform-*d*)  $\delta$  141.84, 128.57, 128.47, 126.04, 37.59.

### 2-(2-phenylethyl-1,1,2,2-d<sub>4</sub>)aniline (**3v**)

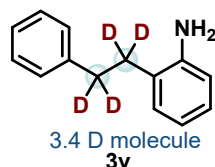

Synthesized from 2-(phenylethynyl)aniline (19.4 mg, 0.10 mmol) following the general procedure for tetra-deuteration, the reaction was carried out in 5 mL stainless-steel jars with stainless-steel balls (diameter 10 mm) and then milled at a frequency of 30 Hz for 60 minutes. The product was obtained and purified by flash column chromatography on silica (PE:EA = 10:1) to give 2-(2-phenylethyl-1,1,2,2-d<sub>4</sub>)aniline (**3v**) as a brown oil (89% yield).

**<sup>1</sup>H NMR** (400 MHz, Chloroform-*d*)  $\delta$  7.34 (t,  $J$  = 7.4 Hz, 2H), 7.28-7.24 (m, 3H), 7.13-7.07 (m, 2H), 6.79 (t,  $J$  = 7.4 Hz, 1H), 6.71 (d,  $J$  = 8.0 Hz, 1H), 3.54 (s, 2H), 2.96 (d,  $J$  = 7.0 Hz, 0.28H), 2.81 (d,  $J$  = 6.8 Hz, 0.30H). **<sup>13</sup>C NMR** (101 MHz, Chloroform-*d*)  $\delta$  144.28, 141.88, 129.50, 128.56, 128.51, 127.25, 126.15, 126.02, 118.98, 115.77, 35.06, 33.16. **HRMS** (ESI): Calcd for C<sub>14</sub>H<sub>12</sub>D<sub>4</sub>N [M+H]<sup>+</sup> 202.1528, found: 202.1532.

### 5-(2-phenylethyl-1,1,2,2-d<sub>4</sub>) benzo[d][1,3]dioxole (**3w**)

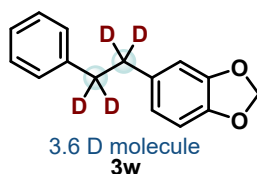

Synthesized from 5-(phenylethynyl)benzo[d][1,3]dioxole (22.2 mg, 0.10 mmol) following the general procedure for tetra-deuteration, the reaction was carried out in 5 mL stainless-steel jars with stainless-steel balls (diameter 10 mm) and then milled at a frequency of 30 Hz for 60 minutes. The product was obtained and purified by flash column chromatography on silica (PE:EA = 100:1) to give 5-(2-phenylethyl-1,1,2,2-d<sub>4</sub>)benzo[d][1,3]dioxole (**3w**) as a white solid (76% yield).

**<sup>1</sup>H NMR** (400 MHz, Chloroform-*d*)  $\delta$  7.30 (q,  $J$  = 8.4, 7.9 Hz, 2H), 7.22 (dd,  $J$  = 13.4, 6.9 Hz, 3H), 6.79-6.71 (m, 2H), 6.65 (d,  $J$  = 6.1 Hz, 1H), 5.95 (s, 2H), 2.86 (d,  $J$  = 14 Hz, 0.36H). **<sup>13</sup>C NMR** (101 MHz, Chloroform-*d*)  $\delta$  147.64, 145.78, 141.68, 135.69, 128.57, 128.46, 126.06, 121.30, 109.04, 108.24, 100.88, 37.46. **HRMS** (ESI): Calcd for C<sub>15</sub>H<sub>10</sub>D<sub>4</sub>O<sub>2</sub>Na [M+Na]<sup>+</sup> 253.1137, found: 253.1140.

### ethyl 3-phenylpropanoate-2,2,3,3-d<sub>4</sub> (3x)

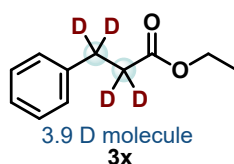

Synthesized from ethyl 3-phenylpropiolate (17.4 mg, 0.10 mmol) following the general procedure for tetra-deuteration, the reaction was carried out in 5 mL stainless-steel jars with stainless-steel balls (diameter 10 mm) and then milled at a frequency of 30 Hz for 60 minutes. The product was obtained and purified by flash column chromatography on silica (PE:EA = 100:1) to give ethyl 3-phenylpropanoate-2,2,3,3-d<sub>4</sub> (**3x**) as a colorless oil (84% yield).<sup>[13]</sup>

**<sup>1</sup>H NMR** (400 MHz, Chloroform-*d*)  $\delta$  7.34 (q,  $J = 6.3, 4.7$  Hz, 2H), 7.29-7.21 (m, 3H), 4.18 (q,  $J = 7.2$  Hz, 2H), 2.98 (s, 0.07H), 2.64 (s, 0.08H), 1.29 (t,  $J = 7.2$  Hz, 3H). **<sup>13</sup>C NMR** (101 MHz, Chloroform-*d*)  $\delta$  173.04, 140.57, 128.56, 128.39, 126.32, 60.47, 35.61, 30.61, 14.30.

### 3-phenylpropan-2,2,3,3-d<sub>4</sub>-1-ol (3y)

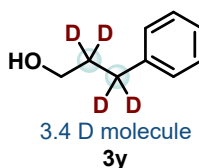

Synthesized from 3-phenylprop-2-yn-1-ol (13.2 mg, 0.10 mmol) following the general procedure for tetra-deuteration, the reaction was carried out in 5 mL stainless-steel jars with stainless-steel balls (diameter 10 mm) and then milled at a frequency of 30 Hz for 60 minutes. The product was obtained and purified by flash column chromatography on silica (PE:EA = 10:1) to give 3-phenylpropan-2,2,3,3-d<sub>4</sub>-1-ol (**3y**) as a colorless oil (69% yield).

**<sup>1</sup>H NMR** (400 MHz, Chloroform-*d*)  $\delta$  7.30 (t,  $J = 7.5$  Hz, 2H), 7.21 (t,  $J = 7.3$  Hz, 3H), 3.67 (s, 2H), 2.70 (d,  $J = 7.4$  Hz, 0.35H), 1.88 (d,  $J = 7.3$  Hz, 0.30H), 1.72 (s, 1H). **<sup>13</sup>C NMR** (101 MHz, Chloroform-*d*)  $\delta$  141.86, 128.52, 128.49, 125.95, 62.17, 33.95, 31.82. **HRMS** (ESI): Calcd for C<sub>9</sub>H<sub>9</sub>D<sub>4</sub>O [M+H]<sup>+</sup> 137.0930, found: 137.0936.

### N,N-dimethyl-3-phenylpropanamide-2,2,3,3-d<sub>4</sub> (**3z**)

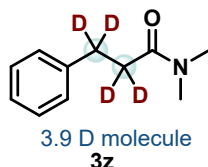

Synthesized from N,N-dimethyl-3-phenylpropiolamide (17.3 mg, 0.10 mmol) following the general procedure for tetra-deuteration, the reaction was carried out in 5 mL stainless-steel jars with stainless-steel balls (diameter 10 mm) and then milled at a frequency of 30 Hz for 60 minutes. The product was obtained and purified by flash column chromatography on silica (PE:EA = 100:1) to give N,N-dimethyl-3-phenylpropanamide-2,2,3,3-d<sub>4</sub> (**3z**) as a colorless oil (90% yield).

**<sup>1</sup>H NMR** (400 MHz, Chloroform-*d*)  $\delta$  7.28 (t,  $J = 7.4$  Hz, 2H), 7.25-7.16 (m, 3H), 2.93 (d,  $J = 9.4$  Hz, 6H), 2.58 (d,  $J = 7.8$  Hz, 0.16H). **<sup>13</sup>C NMR** (101 MHz, Chloroform-*d*)  $\delta$  172.31, 141.46, 128.54, 128.49, 126.17, 37.24, 35.48, 34.61, 30.79. **HRMS** (ESI): Calcd for C<sub>11</sub>H<sub>11</sub>D<sub>4</sub>NOK [M+K]<sup>+</sup> 220.1036, found: 220.1038.

### 4-(2-cyclopropylethyl-1,1,2,2-d<sub>4</sub>)-1,1'-biphenyl (**3aa**)

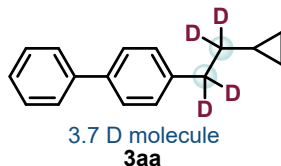

Synthesized from 4-(cyclopropylethynyl)-1,1'-biphenyl (21.8 mg, 0.10 mmol) following the general procedure for tetra-deuteration, the reaction was carried out in 5 mL stainless-steel jars with stainless-steel balls (diameter 10 mm) and then milled at a frequency of 30 Hz for 60 minutes. The product was obtained and purified by flash column chromatography on silica (PE) to give 4-(2-cyclopropylethyl-1,1,2,2-d<sub>4</sub>)-1,1'-biphenyl (**3aa**) as a white solid (79% yield).

**<sup>1</sup>H NMR** (400 MHz, Chloroform-*d*)  $\delta$  7.59 (d,  $J = 7.1$  Hz, 2H), 7.51 (d,  $J = 8.2$  Hz, 2H), 7.43 (t,  $J = 7.7$  Hz, 2H), 7.32 (t,  $J = 7.4$  Hz, 1H), 7.26 (d,  $J = 12.8$  Hz, 2H), 2.75 (d,  $J = 8.08$  Hz, 0.17H), 1.26 (s, 0.13H), 0.73 (tt,  $J = 8.5, 5.1$  Hz, 1H), 0.49-0.38 (m, 2H), 0.14-0.04 (m, 2H). **<sup>13</sup>C NMR** (101 MHz, Chloroform-*d*)  $\delta$  141.90, 141.33, 138.70, 129.00, 128.83, 127.13, 127.11, 127.09, 35.05, 10.71, 4.62.

#### 4-(ethyl-1,2-d<sub>2</sub>)-1,1'-biphenyl (3ab)

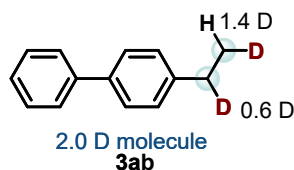

Synthesized from 4-ethynyl-1,1'-biphenyl (17.8 mg, 0.10 mmol) following the general procedure for tetra-deuteration, the reaction was carried out in 5 mL stainless-steel jars with stainless-steel balls (diameter 10 mm) and then milled at a frequency of 30 Hz for 60 minutes. The product was obtained and purified by flash column chromatography on silica (PE) to give 4-(ethyl-1,2-d<sub>2</sub>)-1,1'-biphenyl (**3ab**) as a white solid (85% yield).<sup>[14]</sup>

<sup>1</sup>H NMR data of the pure product: (400 MHz, Chloroform-d)  $\delta$  7.54 (d,  $J = 7.7$  Hz, 2H), 7.48 (d,  $J = 7.8$  Hz, 2H), 7.38 (t,  $J = 7.5$  Hz, 2H), 7.26 (dd,  $J = 21.7, 7.6$  Hz, 3H), 2.64 (q,  $J = 7.3$  Hz, 1.36H), 1.22 (t,  $J = 7.4$  Hz, 1.64H).

#### N,2-dimethyl-N-phenylpropanamide-2,3,3-d<sub>3</sub> (3ac)

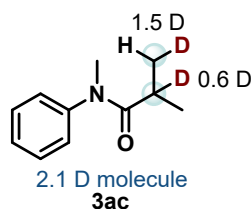

Synthesized from N-methyl-N-phenylmethacrylamide (17.5 mg, 0.10 mmol) following the general procedure for tetra-deuteration, the reaction was carried out in 5 mL stainless-steel jars with stainless-steel balls (diameter 10 mm) and then milled at a frequency of 30 Hz for 60 minutes. The product was obtained and purified by flash column chromatography on silica (PE) to give N,2-dimethyl-N-phenylpropanamide-2,3,3-d<sub>3</sub> (**3ac**) as a white solid (83% yield).

<sup>1</sup>H NMR (400 MHz, Chloroform-d)  $\delta$  7.41 (dd,  $J = 8.3, 6.7$  Hz, 2H), 7.33 (t,  $J = 7.2$  Hz, 1H), 7.20-7.15 (m, 2H), 3.23 (s, 3H), 2.49 (t,  $J = 7.0$  Hz, 0.42H), 1.93 (s, 0.45H), 0.99 (d,  $J = 7.2$  Hz, 3H). <sup>13</sup>C NMR (101 MHz, Chloroform-d)  $\delta$  177.57, 144.40, 129.84, 127.80, 127.37, 37.55, 31.09, 19.77. HRMS (ESI): Calcd for C<sub>11</sub>H<sub>13</sub>D<sub>2</sub>NO [M+H]<sup>+</sup> 181.1415, found: 181.1410.

### 3,5-dichloro-N-(2-methylbutan-2-yl-3,3,4,4-d<sub>4</sub>) benzamide (3ad)

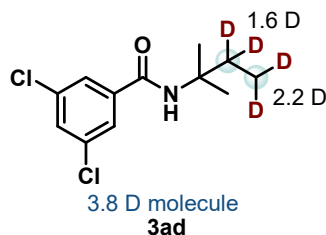

Synthesized from 3,5-dichloro-N-(2-methylbut-3-yn-2-yl)benzamide (25.6 mg, 0.10 mmol) following the general procedure for tetra-deuteration, the reaction was carried out in 5 mL stainless-steel jars with stainless-steel balls (diameter 10 mm) and then milled at a frequency of 30 Hz for 150 minutes. The product was obtained and purified by flash column chromatography on silica (PE:EA = 30:1) to give 3,5-dichloro-N-(2-methylbutan-2-yl-3,3,4,4-d<sub>4</sub>)benzamide (**3ad**) as a white solid (35% yield).

<sup>1</sup>H NMR (400 MHz, Chloroform-*d*) δ 7.55 (s, 2H), 7.43 (s, 1H), 5.80 (s, 1H), 1.78 (d, *J* = 6.7 Hz, 0.36H), 1.40 (s, 6H), 0.85 (d, *J* = 6.7 Hz, 0.84H). <sup>13</sup>C NMR (101 MHz, Chloroform-*d*) δ 164.37, 139.00, 135.44, 131.01, 125.55, 54.92, 31.94, 26.52, 8.01. HRMS (ESI): Calcd for C<sub>12</sub>H<sub>11</sub>D<sub>4</sub>Cl<sub>2</sub>NOK [M+K]<sup>+</sup> 302.0413, found: 302.0413.

### Propyl-2,2,3,3-d<sub>4</sub>-2-(4-((5-chloro-3-fluoropyridin-2-yl)oxy)phenoxy)propanoate (3ae)

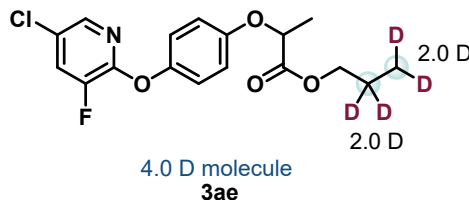

Synthesized from prop-2-yn-1-yl 2-(4-((5-chloro-3-fluoropyridin-2-yl)oxy)phenoxy)propanoate (34.9 mg, 0.10 mmol) following the general procedure for tetra-deuteration, the reaction was carried out in 5 mL stainless-steel jars with stainless-steel balls (diameter 10 mm) and then milled at a frequency of 30 Hz for 120 minutes. The product was obtained and purified by flash column chromatography on silica (PE:EA = 5:1) to give Propyl-2,2,3,3-d<sub>4</sub>-2-(4-((5-chloro-3-fluoropyridin-2-yl)oxy)phenoxy)propanoate (**3ae**) as a white solid (33% yield).

<sup>1</sup>H NMR (400 MHz, Chloroform-*d*) δ 7.86 (s, 1H), 7.50 (d, *J* = 12 Hz, 1H), 7.07 (d, *J* = 8 Hz, 2H), 6.92 (d, *J* = 8 Hz, 2H), 6.76 (m, 1H), 4.16-4.08 (m, 2H), 1.63-1.62 (m, 3H), 0.88-0.84 (m, 0.91H). <sup>13</sup>C NMR (101 MHz, Chloroform-*d*) δ 172.25, 155.02, 151.43, 151.31, 148.31, 146.96, 145.67, 140.19, 140.13, 125.04, 124.96, 124.85, 122.29, 116.04, 73.19, 66.79, 21.92-21.36, 18.69, 9.76-8.85. HRMS (ESI): Calcd for C<sub>17</sub>H<sub>14</sub>D<sub>4</sub>ClFNO<sub>4</sub>K [M+H]<sup>+</sup> 358.1154, found: 358.1155.

### Propyl-2,2,3,3-d<sub>4</sub> 5-(3,5-dimethylphenoxy)-2,2-dimethylpentanoate(3af)

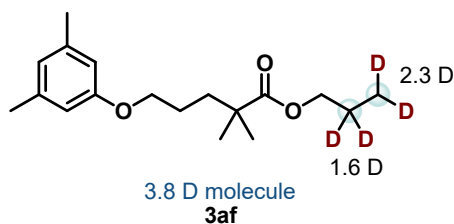

Synthesized from prop-2-yn-1-yl 5-(3,5-dimethylphenoxy)-2,2-dimethylpentanoate (28.8 mg, 0.10 mmol) following the general procedure for tetra-deuteration, the reaction was carried out in 5 mL stainless-steel jars with stainless-steel balls (diameter 10 mm) and then milled at a frequency of 30 Hz for 150 minutes. The product was obtained and purified by flash column chromatography on silica (PE:EA = 30:1) to give propyl-2,2,3,3-d<sub>4</sub> 5-(3,5-dimethylphenoxy) -2,2-dimethylpentanoate (**3af**) as a colorless oily (71% yield).

**<sup>1</sup>H NMR** (400 MHz, Chloroform-*d*) δ 7.02 (d, *J* = 8 Hz, 1H), 6.68 (d, *J* = 4 Hz, 2H), 6.62 (s, 1H), 4.04-4.03 (m, 1.6 H), 3.94-3.91 (s, 2H), 2.32 (s, 3H), 2.18 (s, 3H), 1.75-1.74 (m, 3H), 1.66 (m, 0.51H), 1.26 (m, 6H), 0.93 (m, 0.63H). **<sup>13</sup>C NMR** (101 MHz, Chloroform-*d*) δ 177.92, 177.48, 156.97, 156.96, 136.47, 130.30, 123.60, 120.68, 111.93, 67.96, 67.90, 65.93, 65.88, 64.92, 42.15, 42.13, 37.17, 37.15, 25.22, 25.19, 21.73, 21.43, 15.81, 15.79, 9.82-9.71. **HRMS** (ESI): Calcd for C<sub>18</sub>H<sub>25</sub>D<sub>4</sub>O<sub>3</sub> [M+H]<sup>+</sup> 297.2362, found: 297.2358.

### 3-(4-methoxyphenyl)-7-(propoxy-2,2,3,3-d<sub>4</sub>)-1λ<sup>3</sup>,4λ<sup>5</sup>-chromen-4-one(3ag)

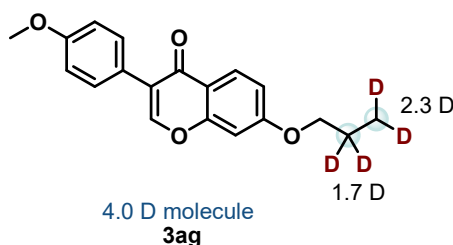

Synthesized from 3-(4-methoxyphenyl)-7-(prop-2-yn-1-yloxy)-1λ<sup>3</sup>,4λ<sup>5</sup>-chromen-4-one (30.6mg, 0.10 mmol) following the general procedure for tetra-deuteration, the reaction was carried out in 5 mL stainless-steel jars with stainless-steel balls (diameter 10 mm) and then milled at a frequency of 30 Hz for 150 minutes. The product was obtained and purified by flash column chromatography on silica (PE:EA = 3:1) to give 3-(4-methoxyphenyl)-7-(propoxy-2,2,3,3-d<sub>4</sub>)-1λ<sup>3</sup>,4λ<sup>5</sup>-chromen-4-one (**3ag**) as light yellow solid (73% yield).

**<sup>1</sup>H NMR** (400 MHz, Chloroform-*d*) δ 8.22 (d, *J* = 12 Hz, 1H), 7.90 (s, 1H), 7.51 (d, *J* = 8 Hz, 2H), 6.99-6.95 (m, 3H), 6.86 (m, 1H), 4.01 (m, 2H), 3.84 (m, 3H), 1.86-1.83 (m, 0.34H), 1.06-1.04 (m, 0.71H). **<sup>13</sup>C NMR** (101 MHz, Chloroform-*d*) δ 175.93, 163.56, 159.55, 157.98, 152.10, 152.07, 130.15, 127.83, 127.70, 124.82, 124.30, 118.23, 114.94, 114.90, 113.96, 101.03, 100.54, 70.03, 55.35, 21.76, 9.70. **HRMS** (ESI): Calcd for C<sub>19</sub>H<sub>15</sub>D<sub>4</sub>O<sub>4</sub> [M+H]<sup>+</sup> 315.1529, found: 315.1523.

### 1-(((2R,5S)-2-isopropyl-5-methylcyclohexyl)oxy)methyl)-4-(2-phenylethyl)-1,1,2,2-d<sub>4</sub>benzene(3ah)

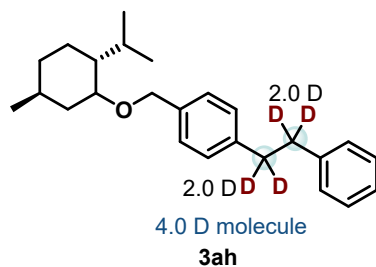

Synthesized from 1-(((1S,2R,5S)-2-isopropyl-5-methylcyclohexyl)oxy)methyl-4-(phenylethynyl)benzene (35.0 mg, 0.10 mmol) following the general procedure for tetra-deuteration, the reaction was carried out in 5 mL stainless-steel jars with stainless-steel balls (diameter 10 mm) and then milled at a frequency of 30 Hz for 180 minutes. The product was obtained and purified by flash column chromatography on silica (PE:EA = 30:1) to give 1-(((2R,5S)-2-isopropyl-5-methylcyclohexyl)oxy)methyl-4-(2-phenylethyl-1,1,2,2-d<sub>4</sub>)benzene (**3ah**) as light yellow oily (80% yield).

**<sup>1</sup>H NMR** (400 MHz, Chloroform-*d*) δ 7.38-7.34 (m, 4H), 7.29-7.22 (m, 5H), 4.73 (d, *J* = 12 Hz, 1H), 4.47 (d, *J* = 12 Hz, 1H), 3.28-3.25 (m, 1H), 2.97 (s, 0.2H), 2.41-2.37 (m, 1H), 2.27 (m, 1H), 1.77-1.69 (m, 2H), 1.42-1.36 (m, 2H), 1.04-1.00 (m, 9H), 0.83-0.79 (m, 3H). **<sup>13</sup>C NMR** (101 MHz, Chloroform-*d*) δ 141.77, 141.01, 140.97, 136.74, 128.53, 128.46, 128.40, 128.29, 128.09, 125.97, 78.97, 78.82, 78.73, 78.66, 70.36, 70.23, 48.40, 40.40, 37.55-37.02, 36.83, 36.64, 34.68, 31.67, 25.58, 25.40, 23.34, 22.51, 21.15, 16.21, 16.17. **HRMS** (ESI): Calcd for C<sub>25</sub>H<sub>30</sub>D<sub>4</sub>ONa [M+Na]<sup>+</sup> 377.2753, found: 377.2756.

## 7. Copies of NMR Spectra

$^1\text{H}$  NMR (400 MHz,  $\text{CDCl}_3$ ) spectrum of S1

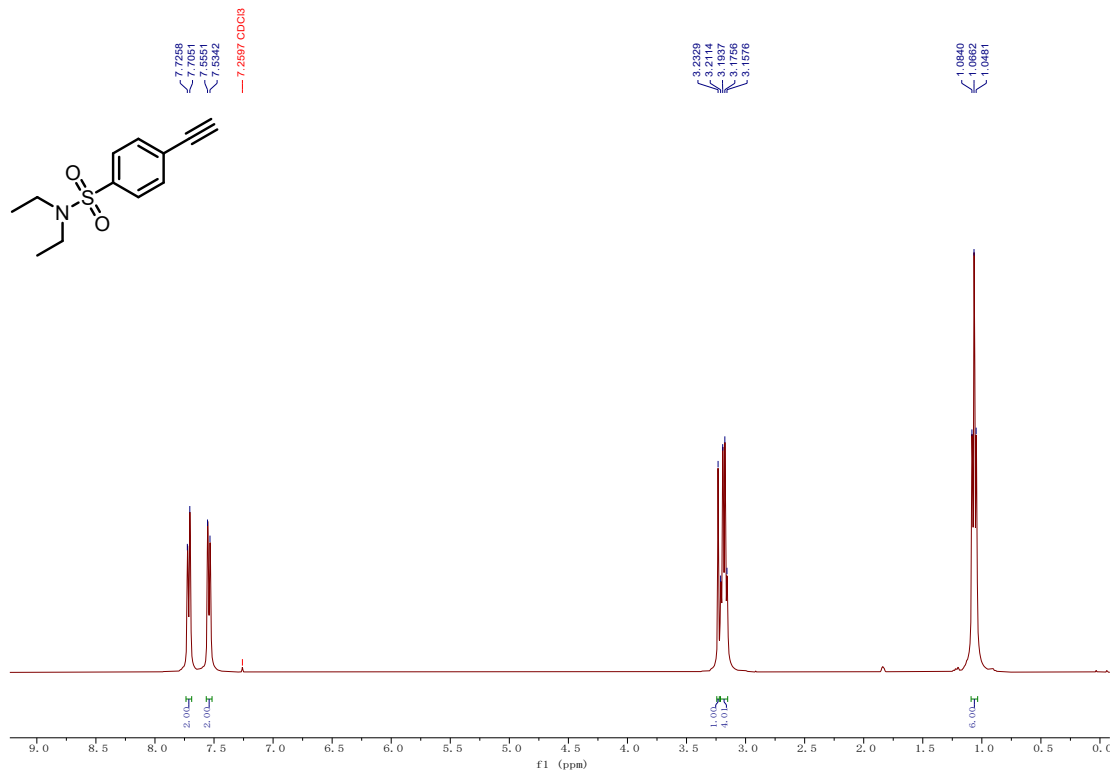

$^{13}\text{C}$  NMR (101 MHz,  $\text{CDCl}_3$ ) spectrum of S1

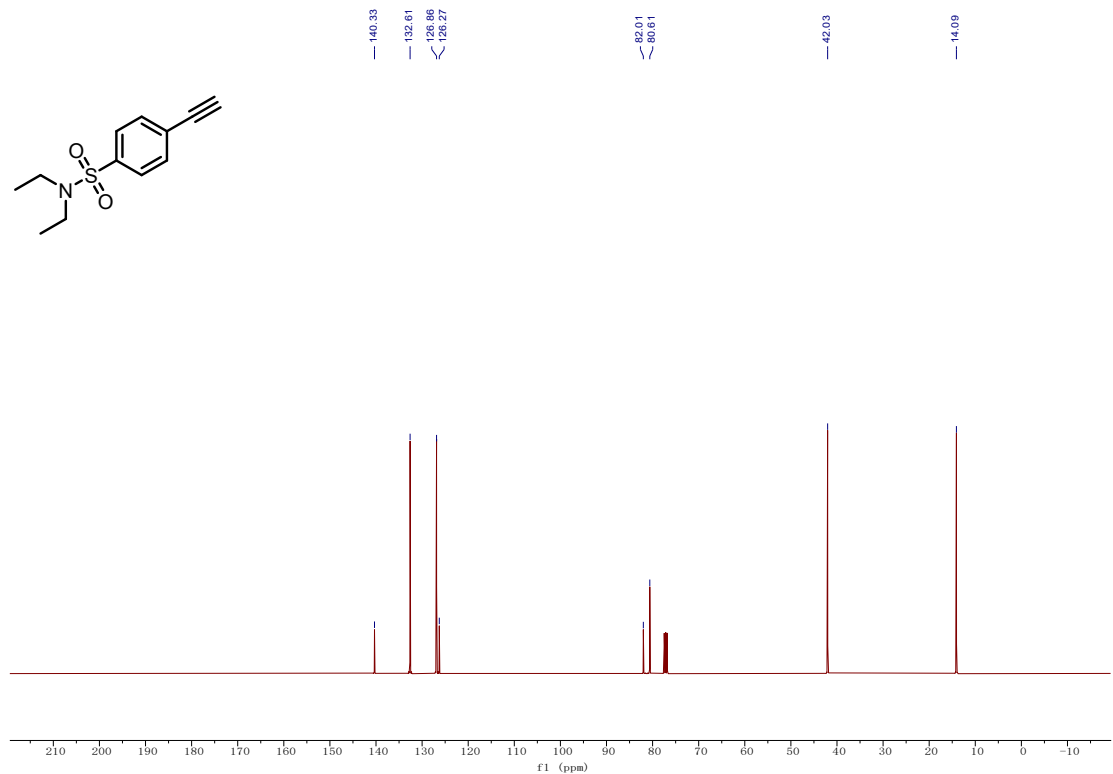

**<sup>1</sup>H NMR (400 MHz, CDCl<sub>3</sub>) spectrum of S2**

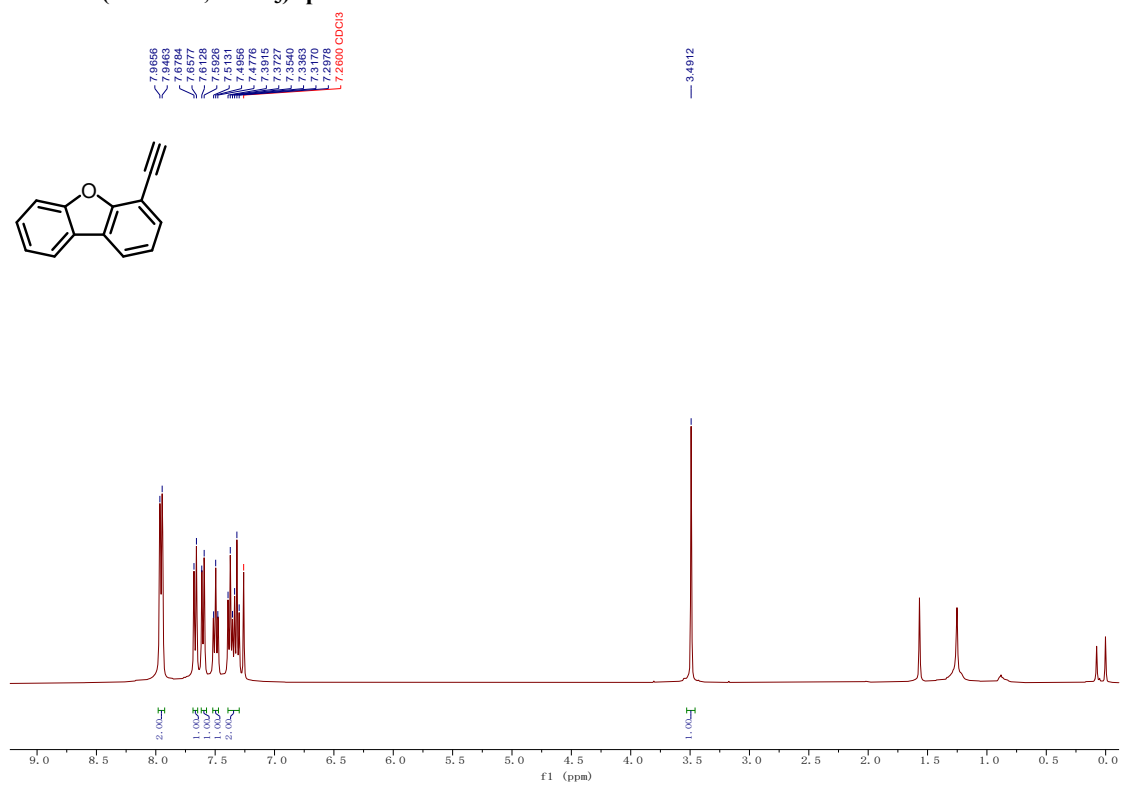

**<sup>13</sup>C NMR (101 MHz, CDCl<sub>3</sub>) spectrum of S2**

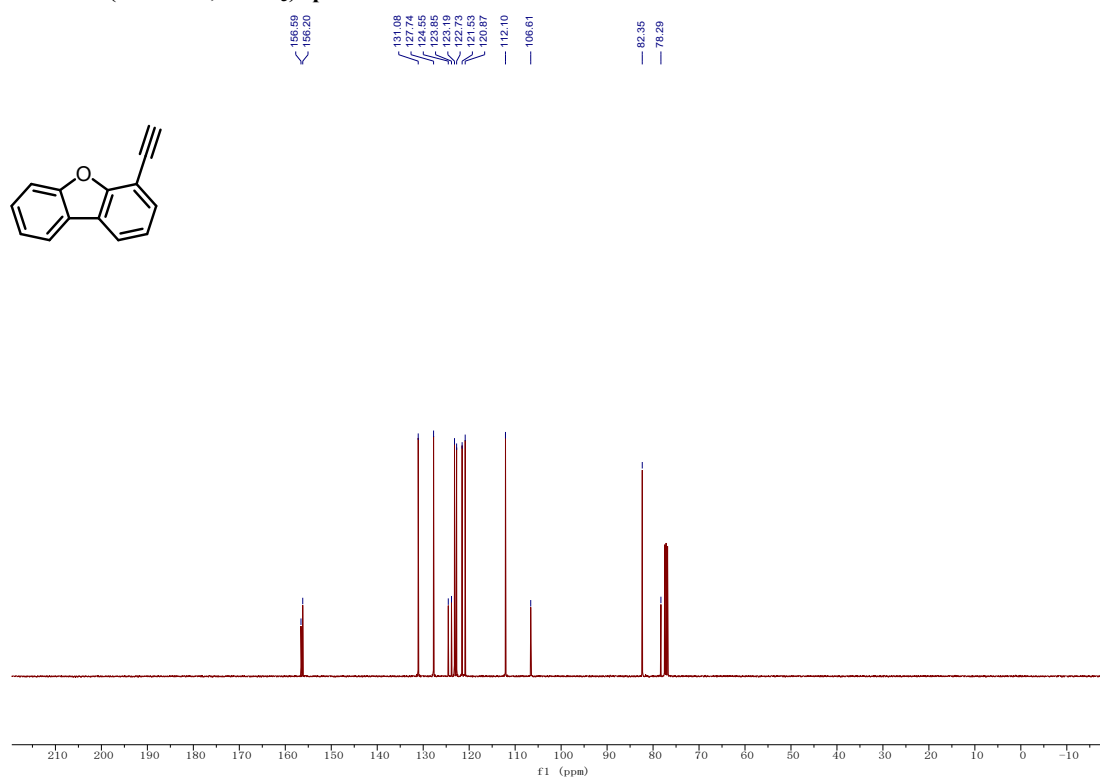

**<sup>1</sup>H NMR (400 MHz, CDCl<sub>3</sub>) spectrum of S3**

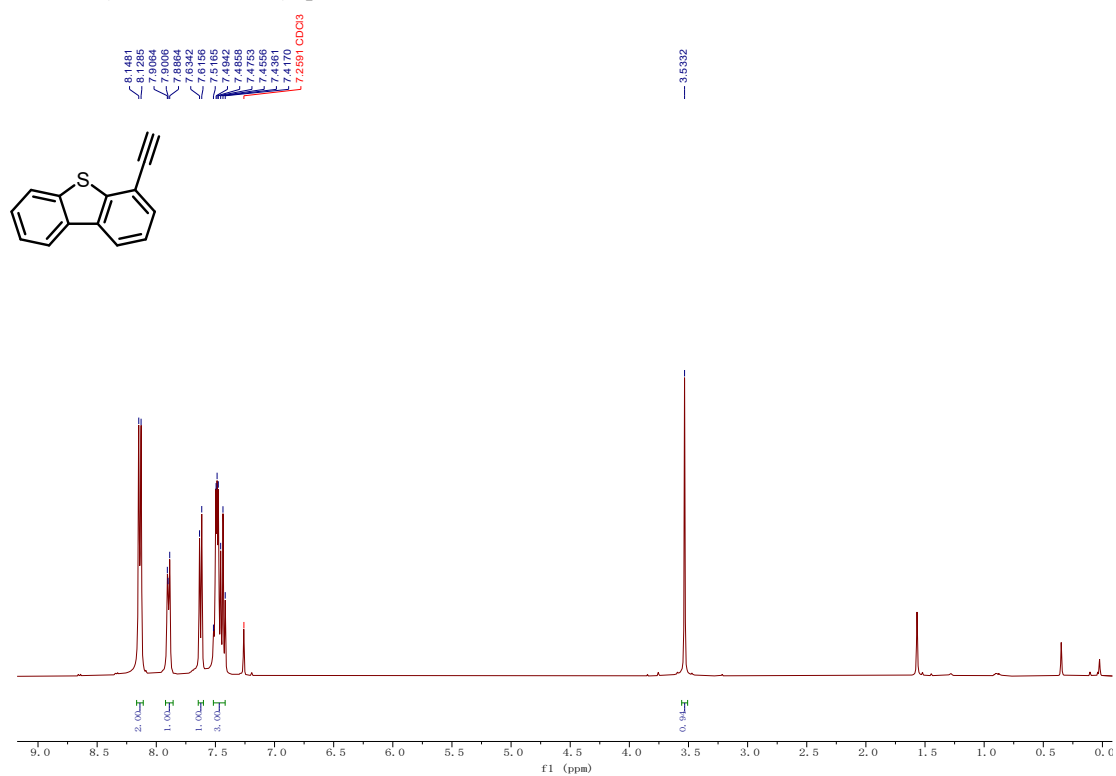

**<sup>13</sup>C NMR (101 MHz, CDCl<sub>3</sub>) spectrum of S3**

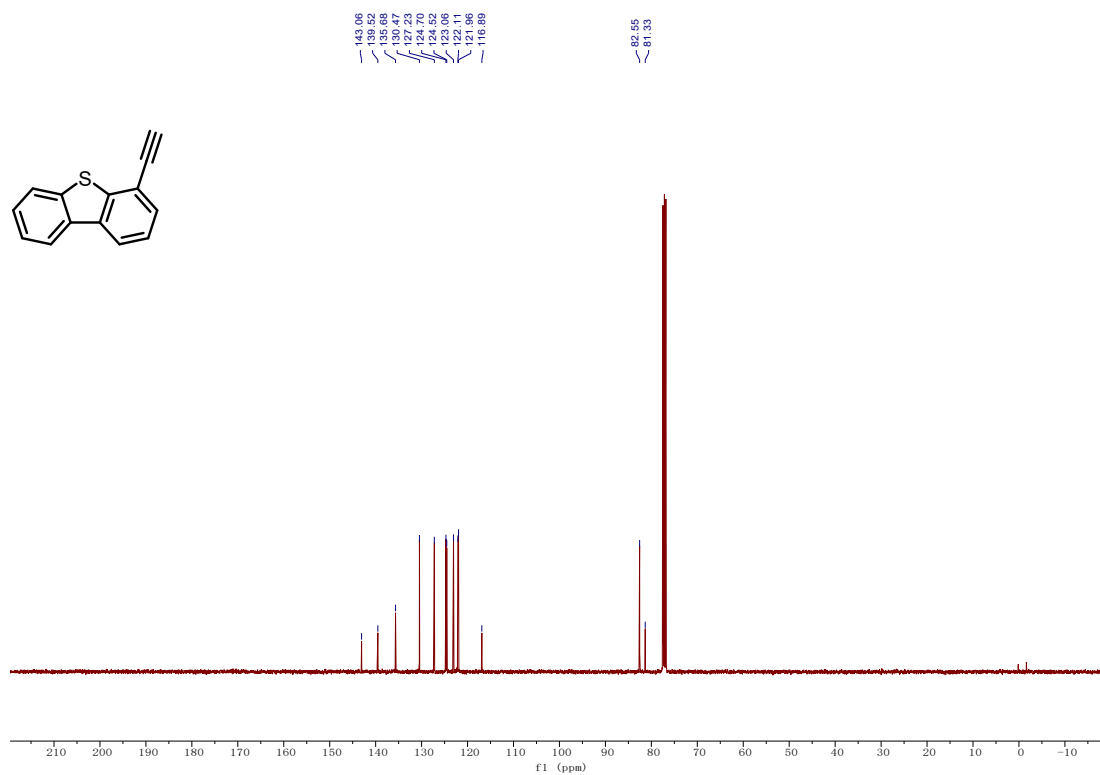

**<sup>1</sup>H NMR (400 MHz, CDCl<sub>3</sub>) spectrum of S4**

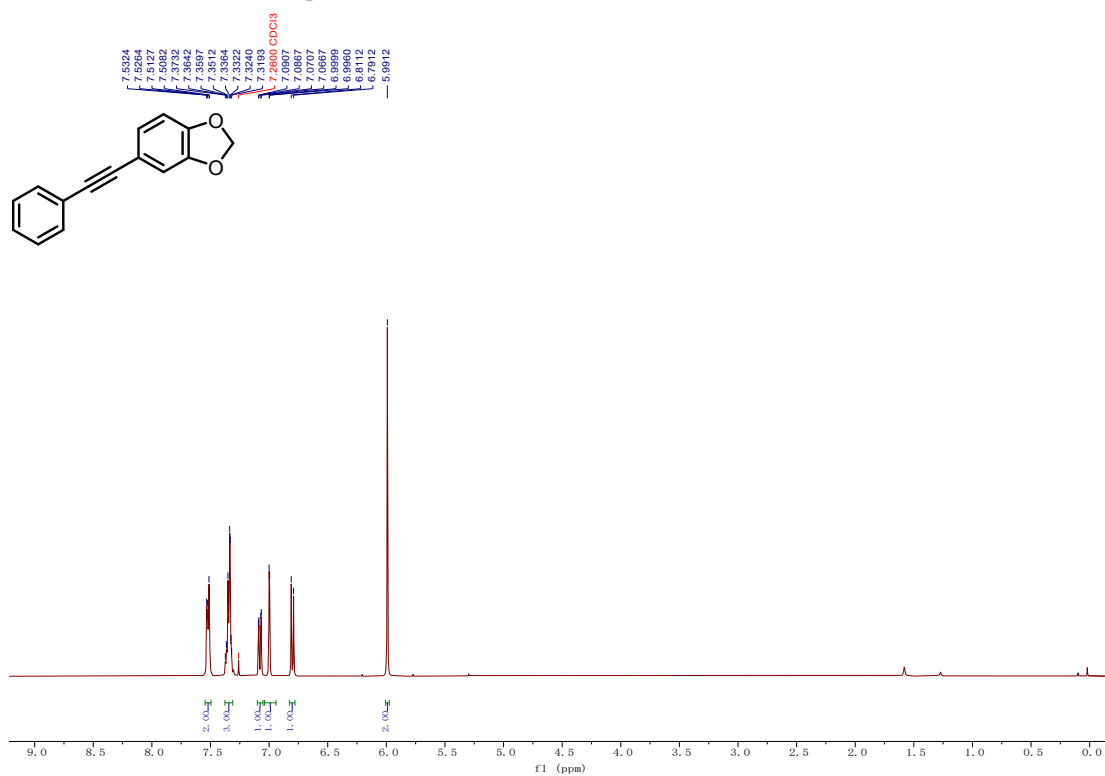

**<sup>13</sup>C NMR (101 MHz, CDCl<sub>3</sub>) spectrum of S4**

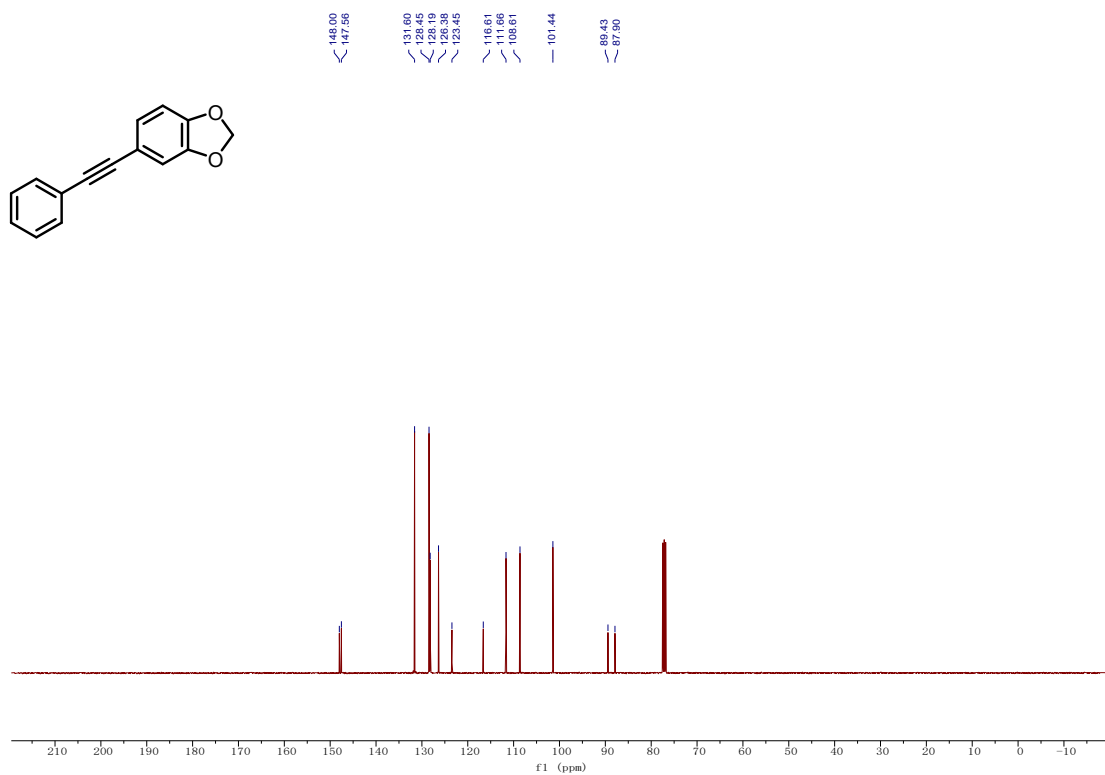

<sup>1</sup>H NMR (400 MHz, CDCl<sub>3</sub>) spectrum of S5

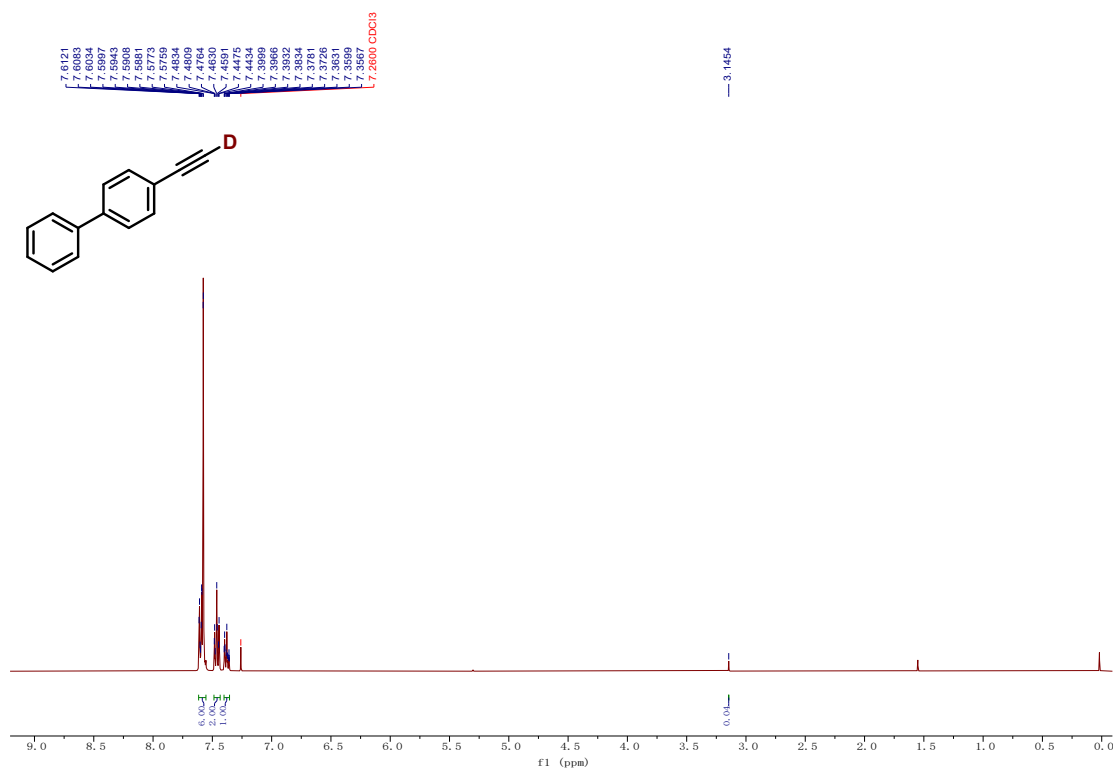

<sup>13</sup>C NMR (101 MHz, CDCl<sub>3</sub>) spectrum of S5

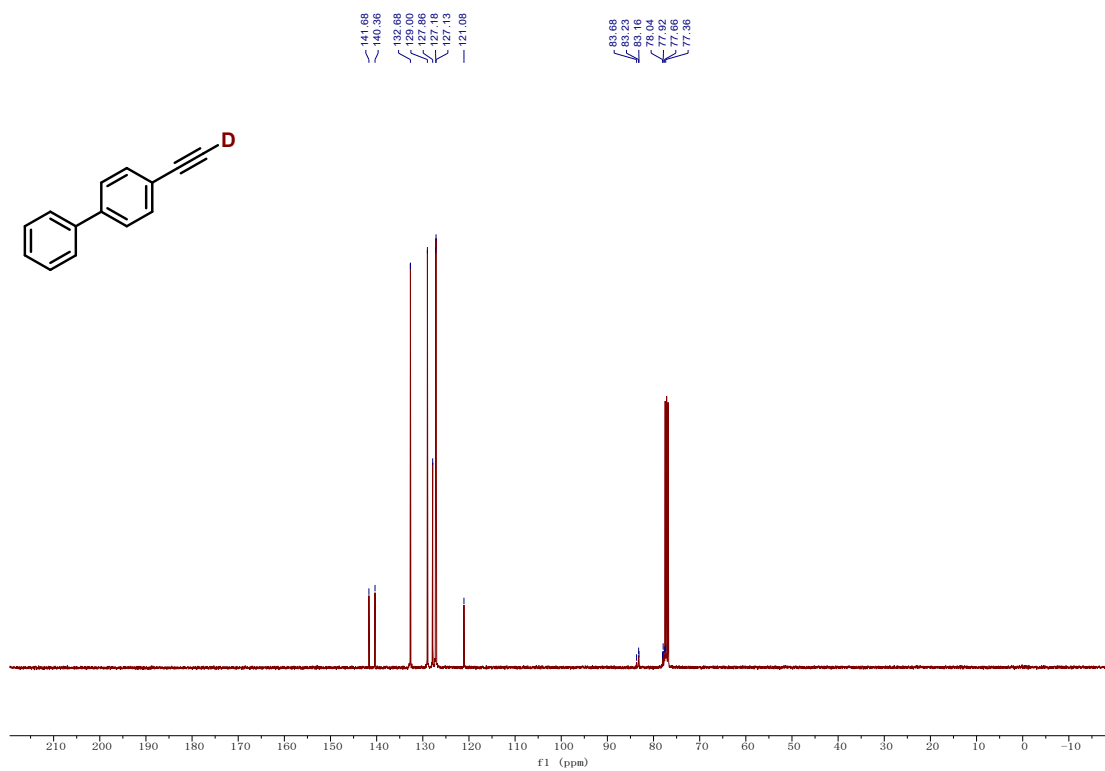

**<sup>1</sup>H NMR (400 MHz, CDCl<sub>3</sub>) spectrum of S6**

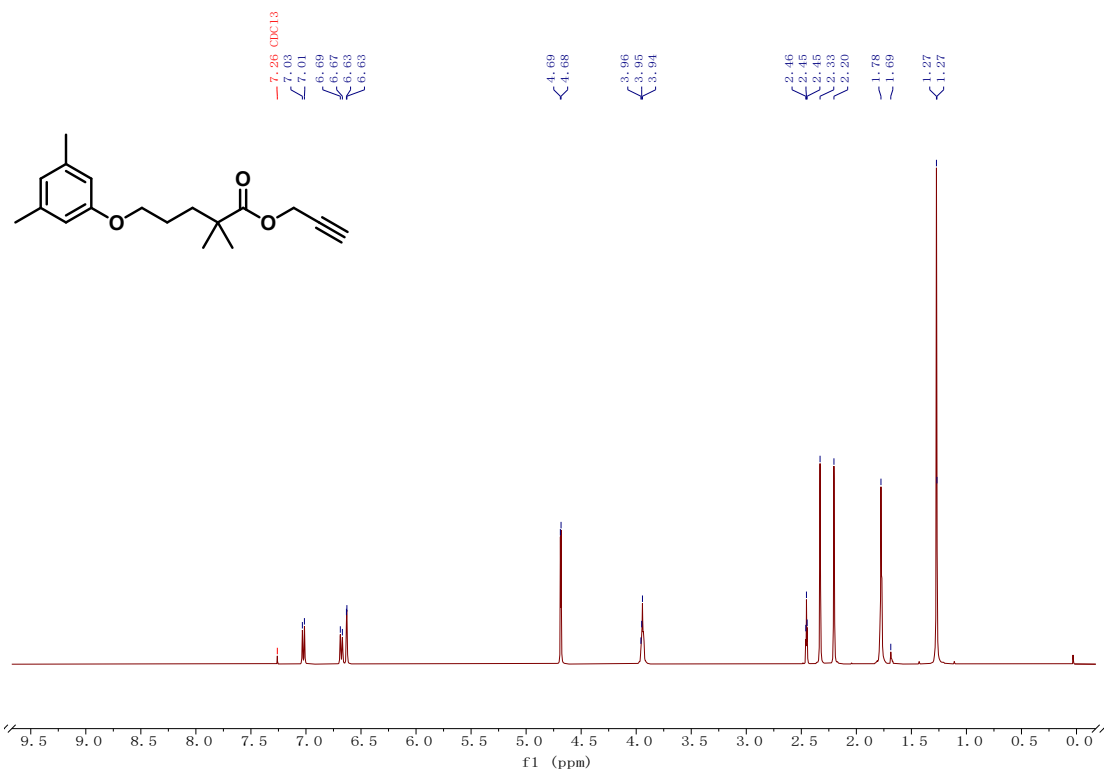

**<sup>13</sup>C NMR (101 MHz, CDCl<sub>3</sub>) spectrum of S6**

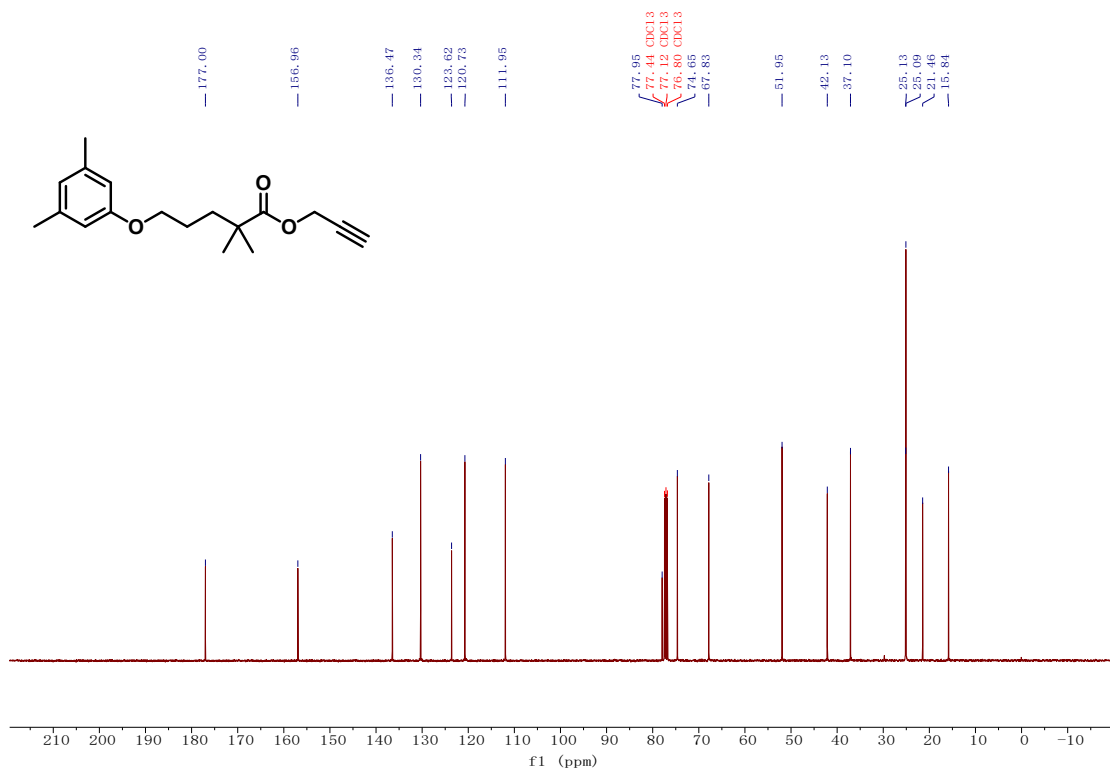

**<sup>1</sup>H NMR (400 MHz, CDCl<sub>3</sub>) spectrum of S7**

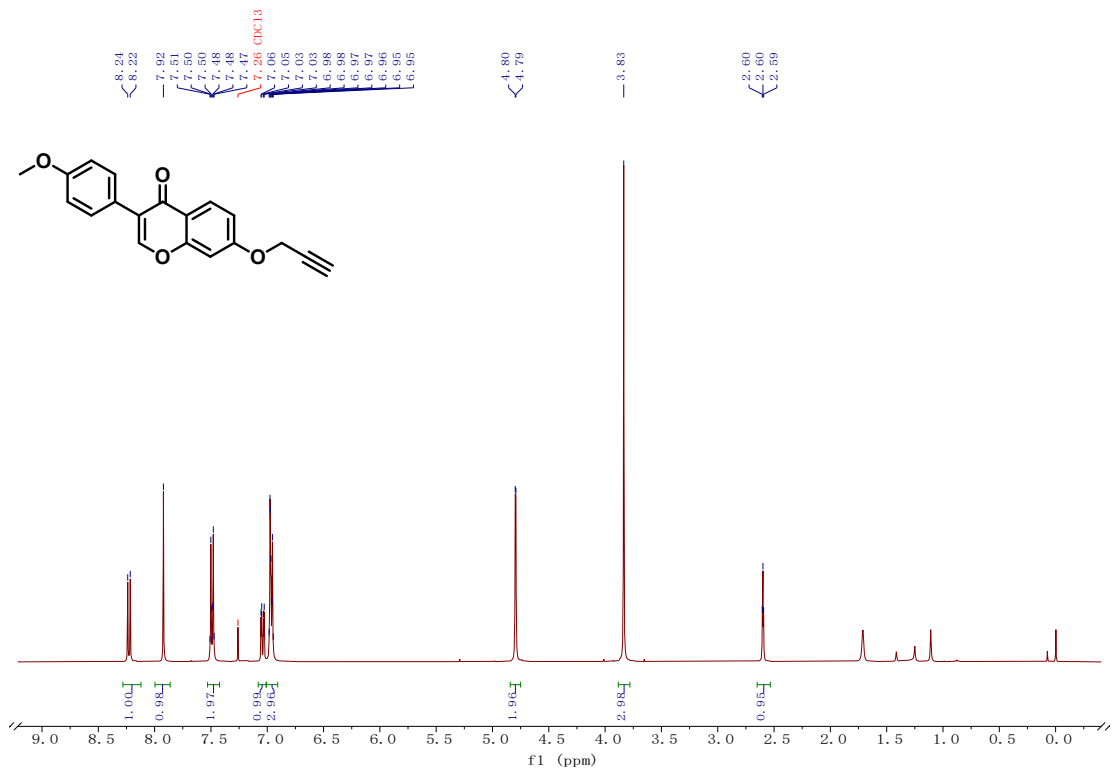

**<sup>13</sup>C NMR (101 MHz, CDCl<sub>3</sub>) spectrum of S7**

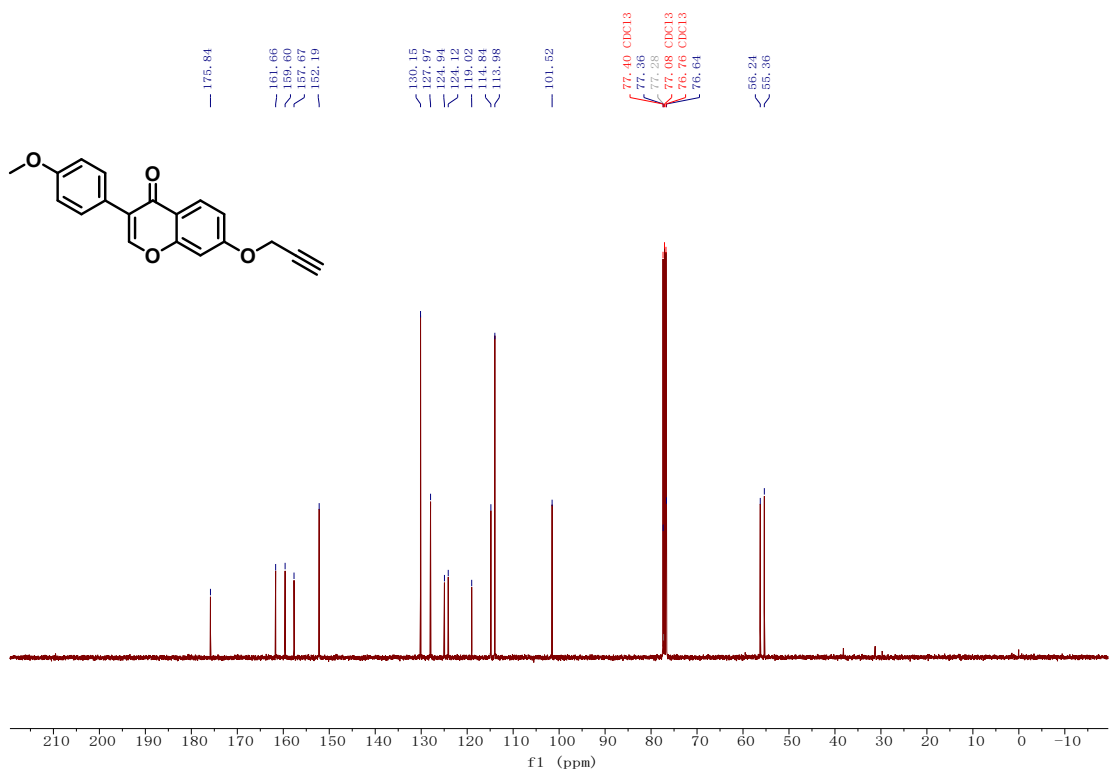

**<sup>1</sup>H NMR (400 MHz, CDCl<sub>3</sub>) spectrum of 2a**

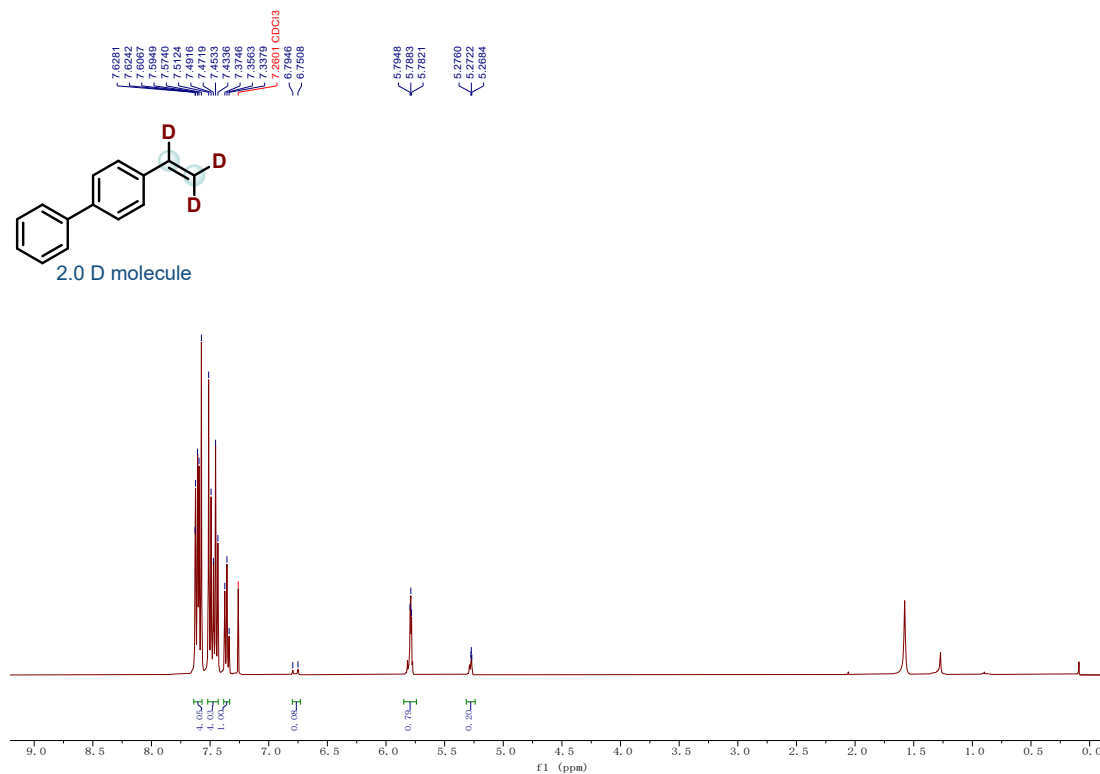

**<sup>13</sup>C NMR (101 MHz, CDCl<sub>3</sub>) spectrum of 2a**

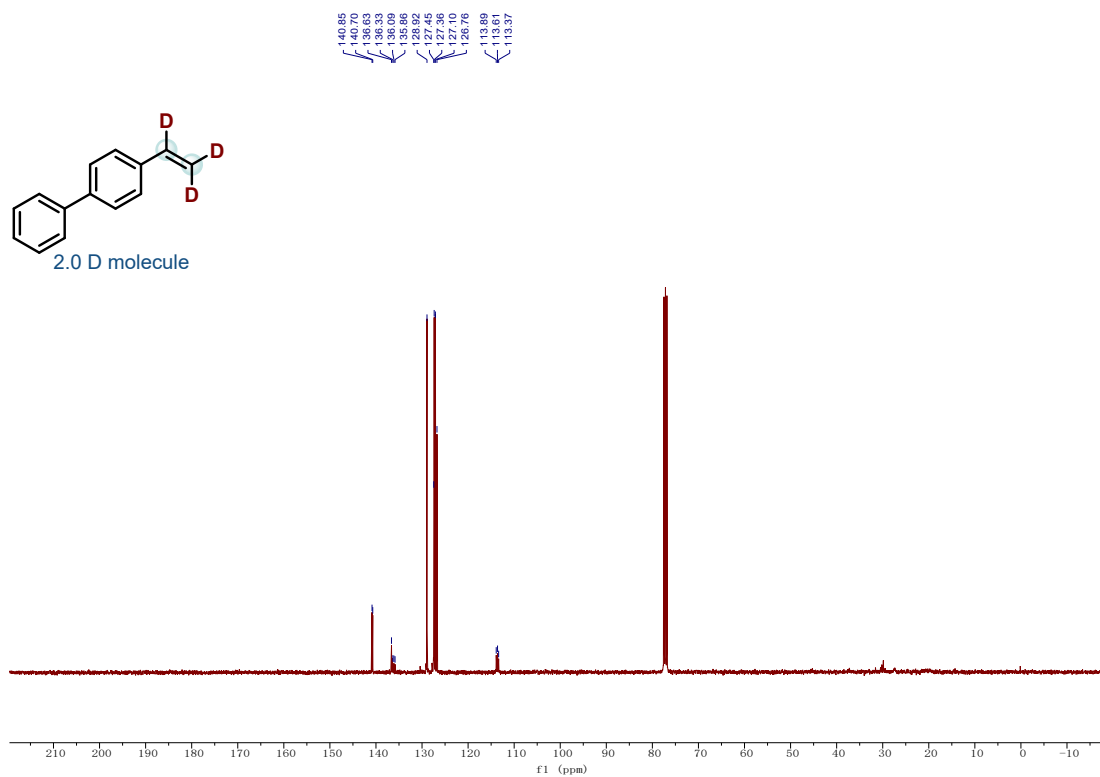

**<sup>1</sup>H NMR (400 MHz, CDCl<sub>3</sub>) spectrum of 2b**

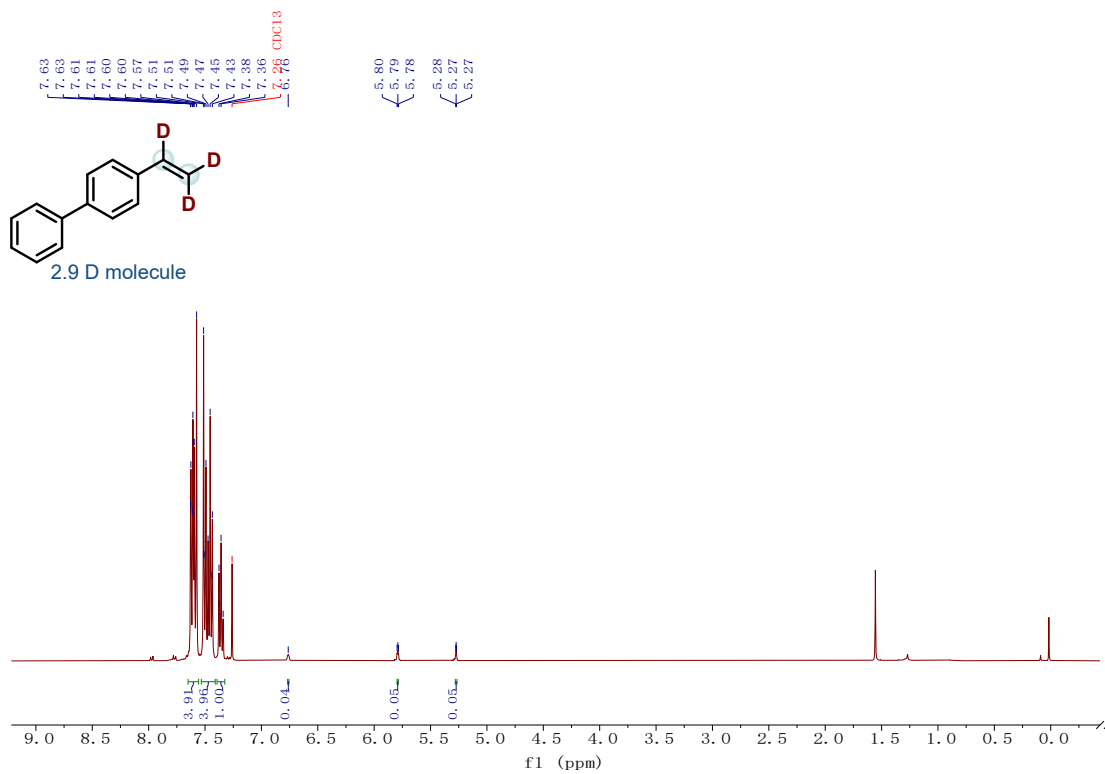

**<sup>13</sup>C NMR (101 MHz, CDCl<sub>3</sub>) spectrum of 2b**

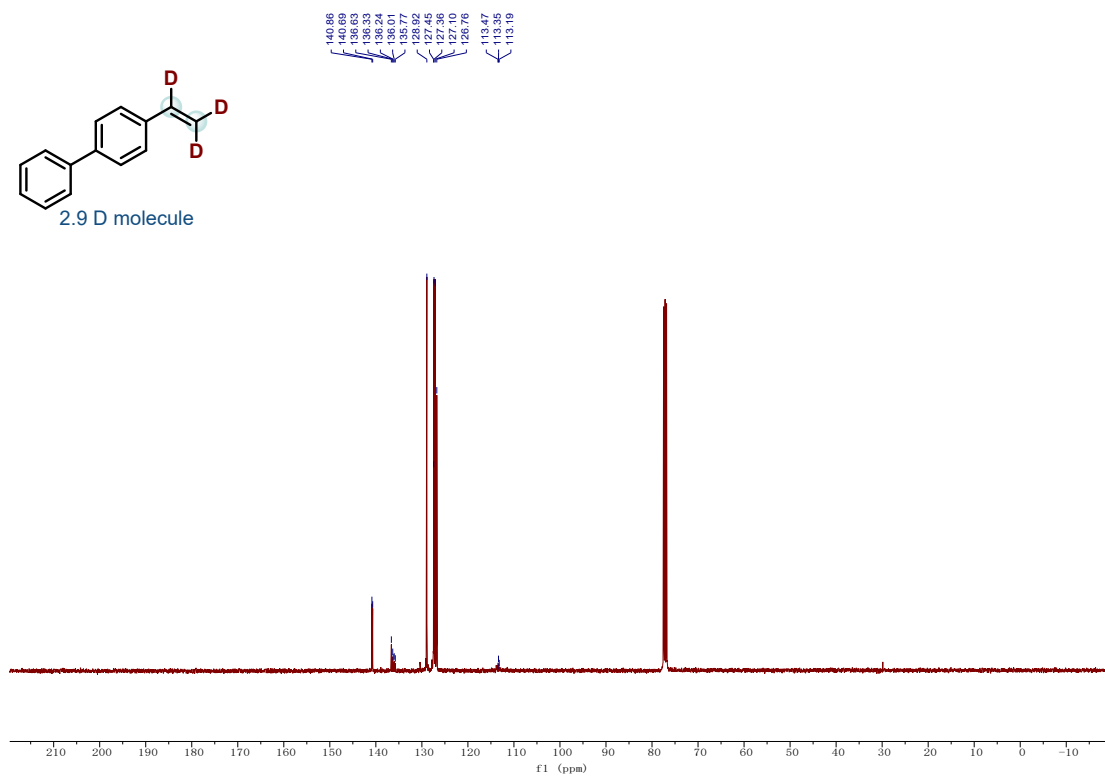

<sup>1</sup>H NMR (400 MHz, CDCl<sub>3</sub>) spectrum of 2c

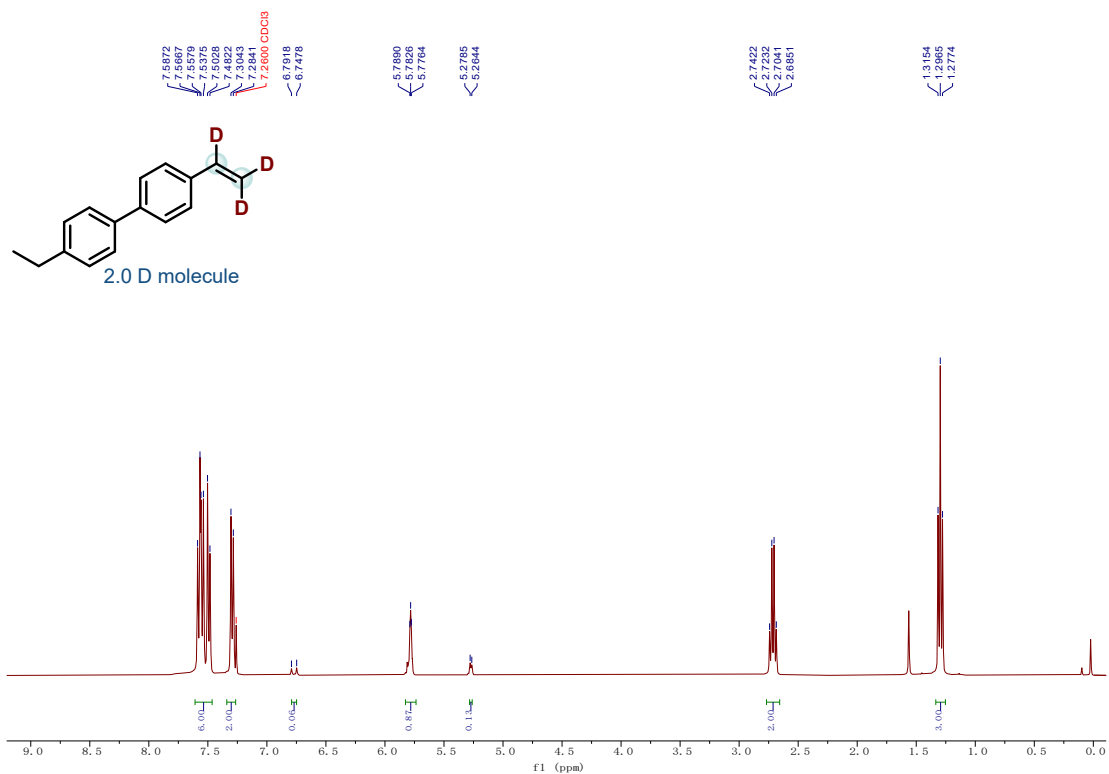

<sup>13</sup>C NMR (101 MHz, CDCl<sub>3</sub>) spectrum of 2c

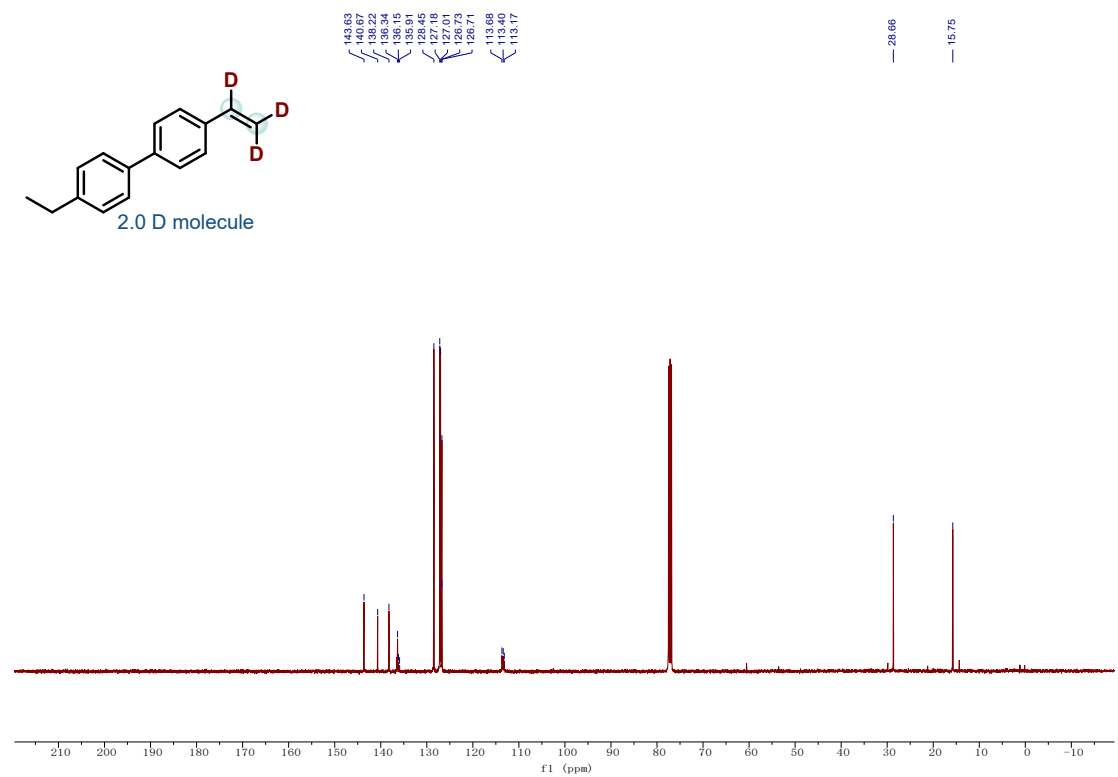

**<sup>1</sup>H NMR (400 MHz, CDCl<sub>3</sub>) spectrum of 2d**

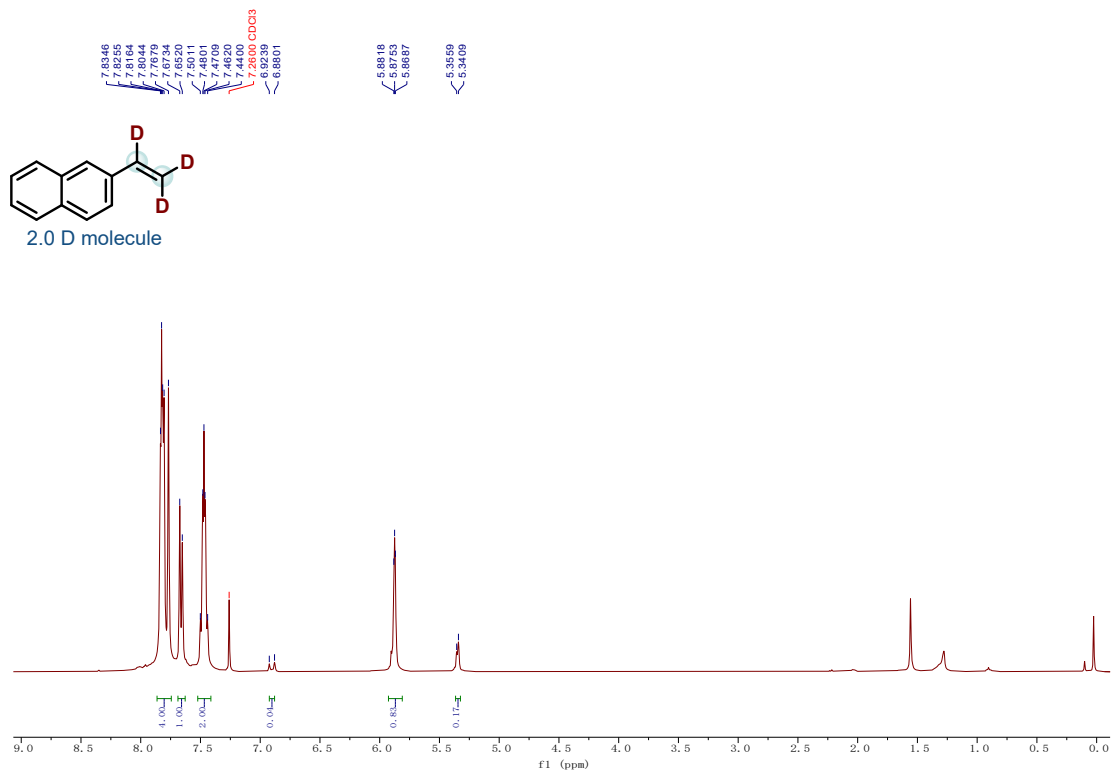

**<sup>13</sup>C NMR (101 MHz, CDCl<sub>3</sub>) spectrum of 2d**

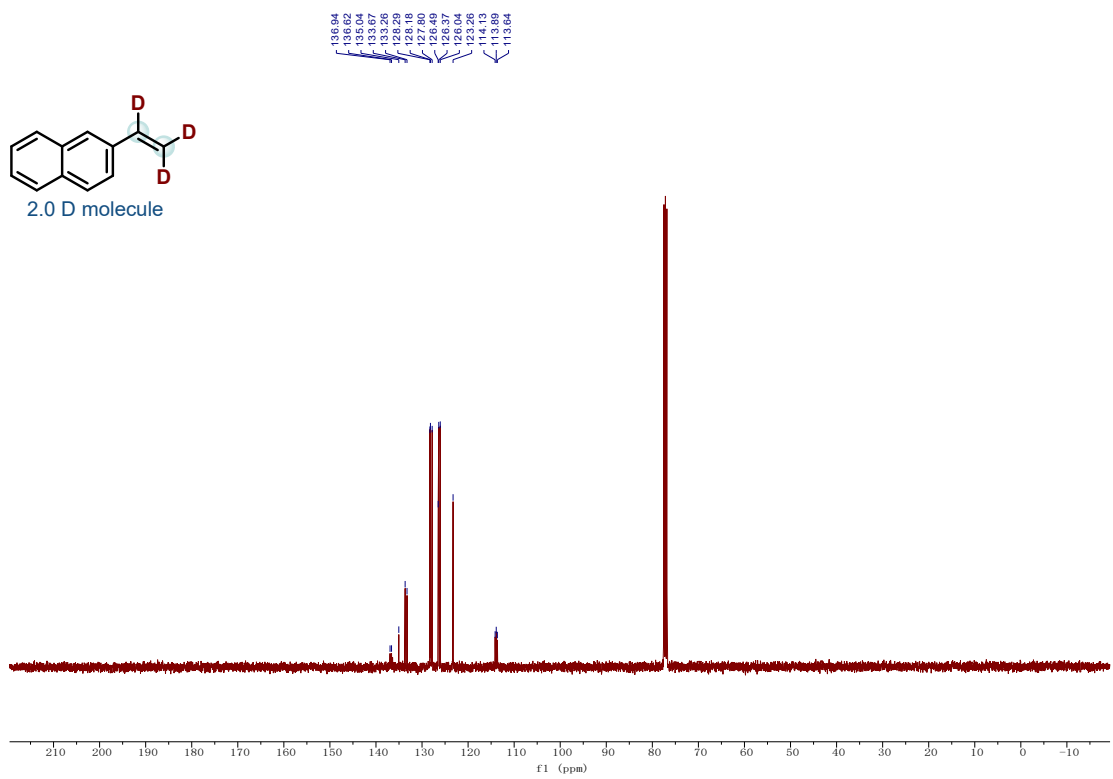

<sup>1</sup>H NMR (400 MHz, CDCl<sub>3</sub>) spectrum of 2e

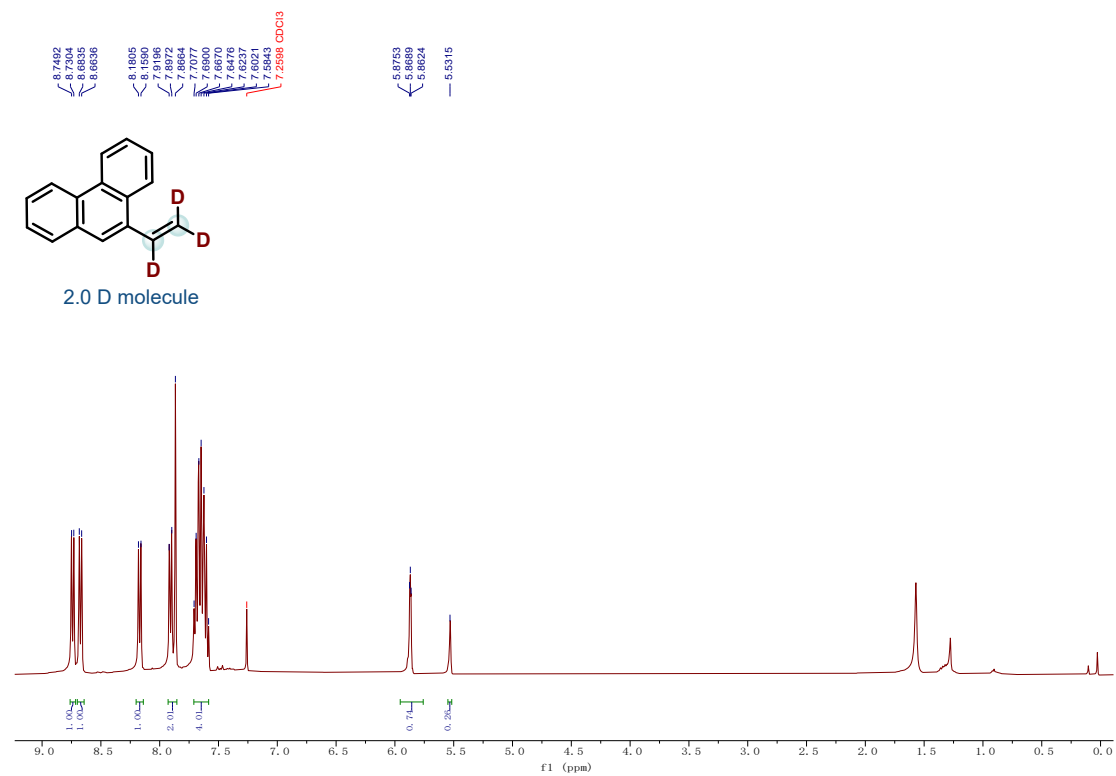

<sup>13</sup>C NMR (101 MHz, CDCl<sub>3</sub>) spectrum of 2e

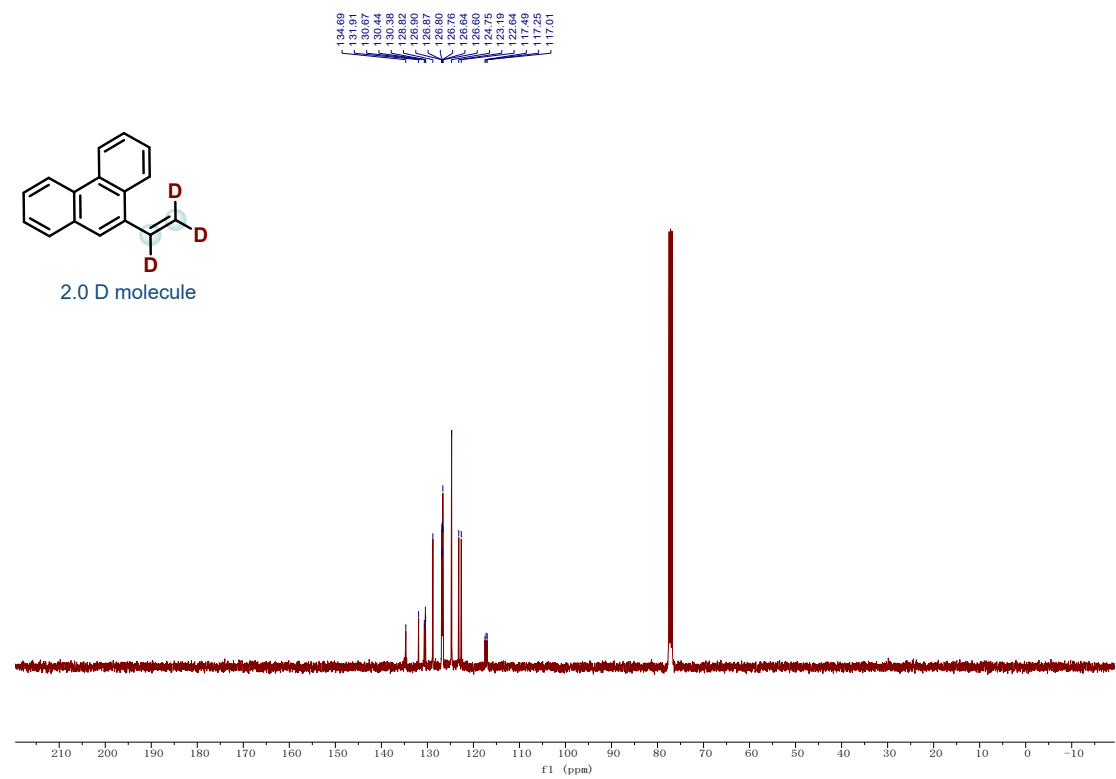

**<sup>1</sup>H NMR (400 MHz, CDCl<sub>3</sub>) spectrum of 2f**

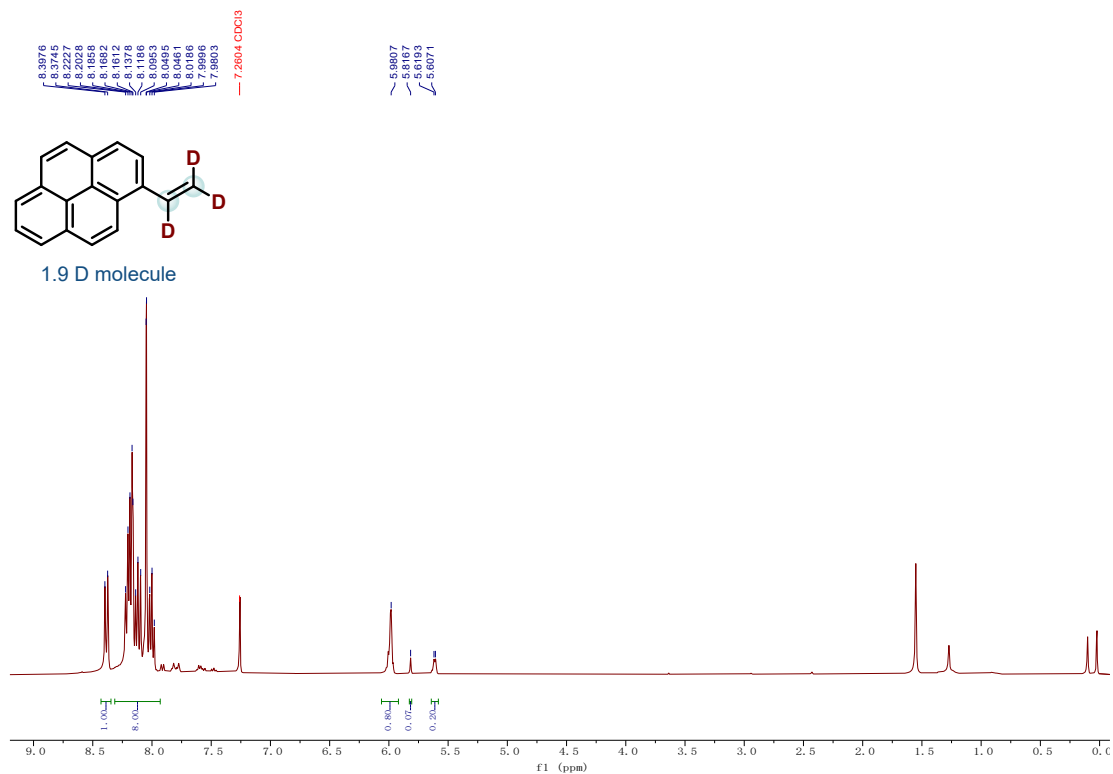

**<sup>13</sup>C NMR (101 MHz, CDCl<sub>3</sub>) spectrum of 2f**

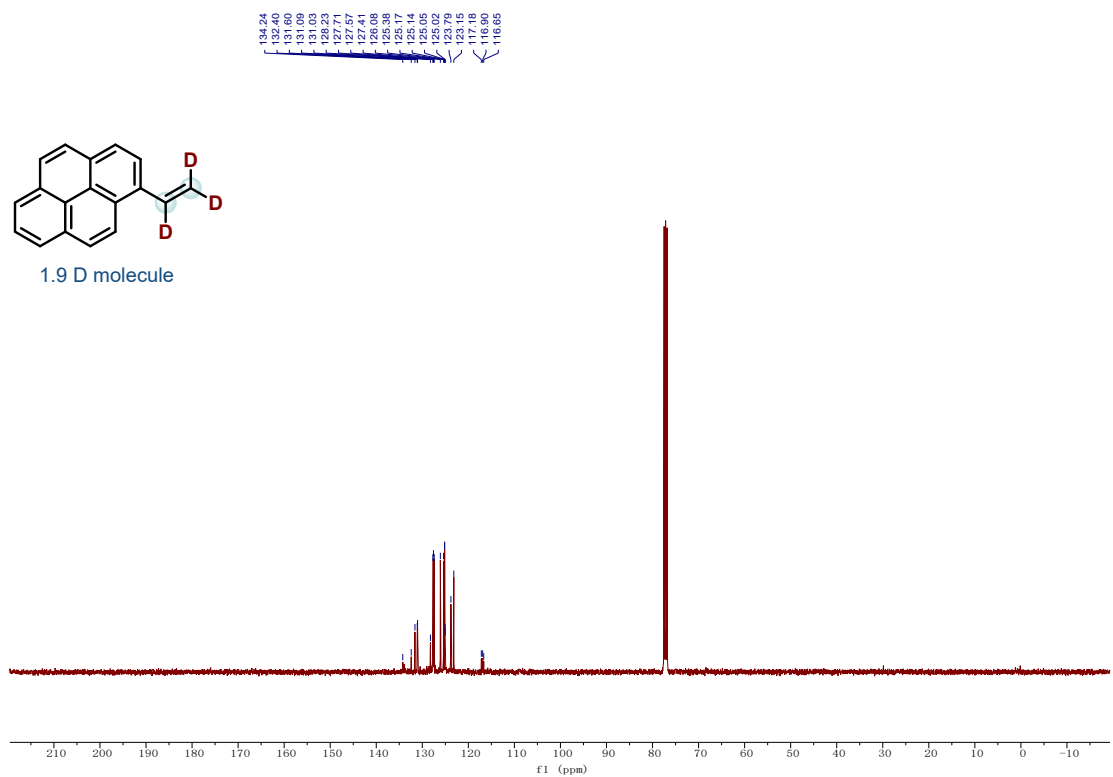

**<sup>1</sup>H NMR (400 MHz, CDCl<sub>3</sub>) spectrum of 2g**

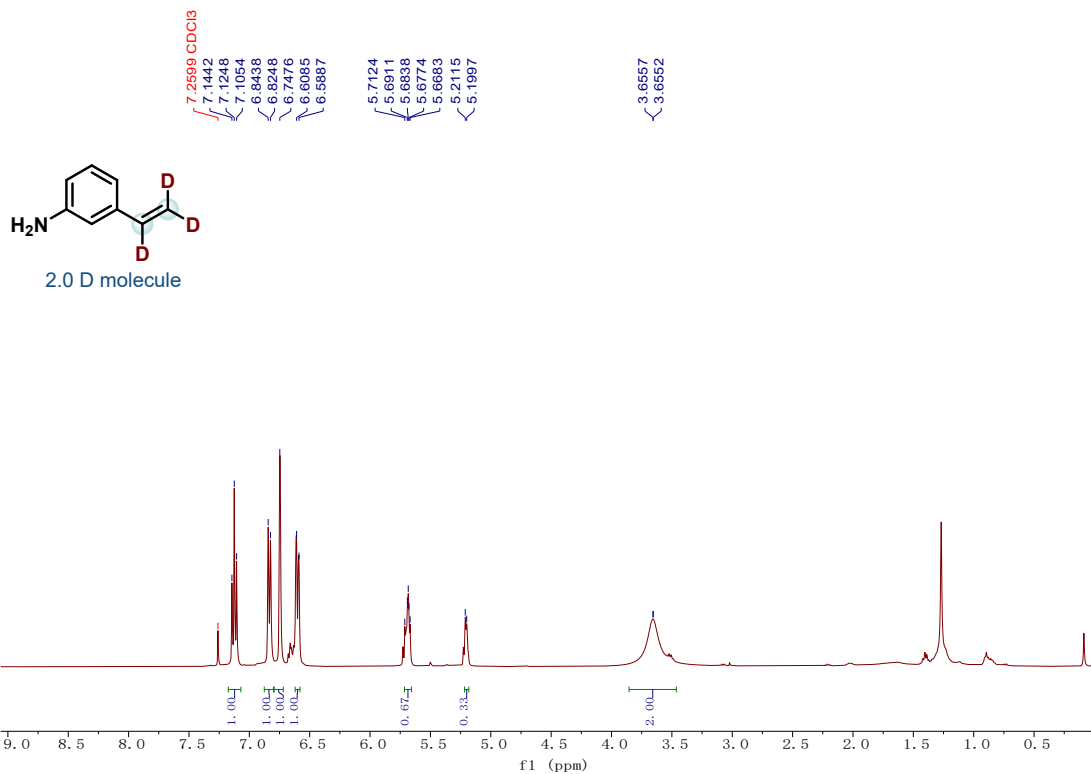

**<sup>13</sup>C NMR (101 MHz, CDCl<sub>3</sub>) spectrum of 2g**

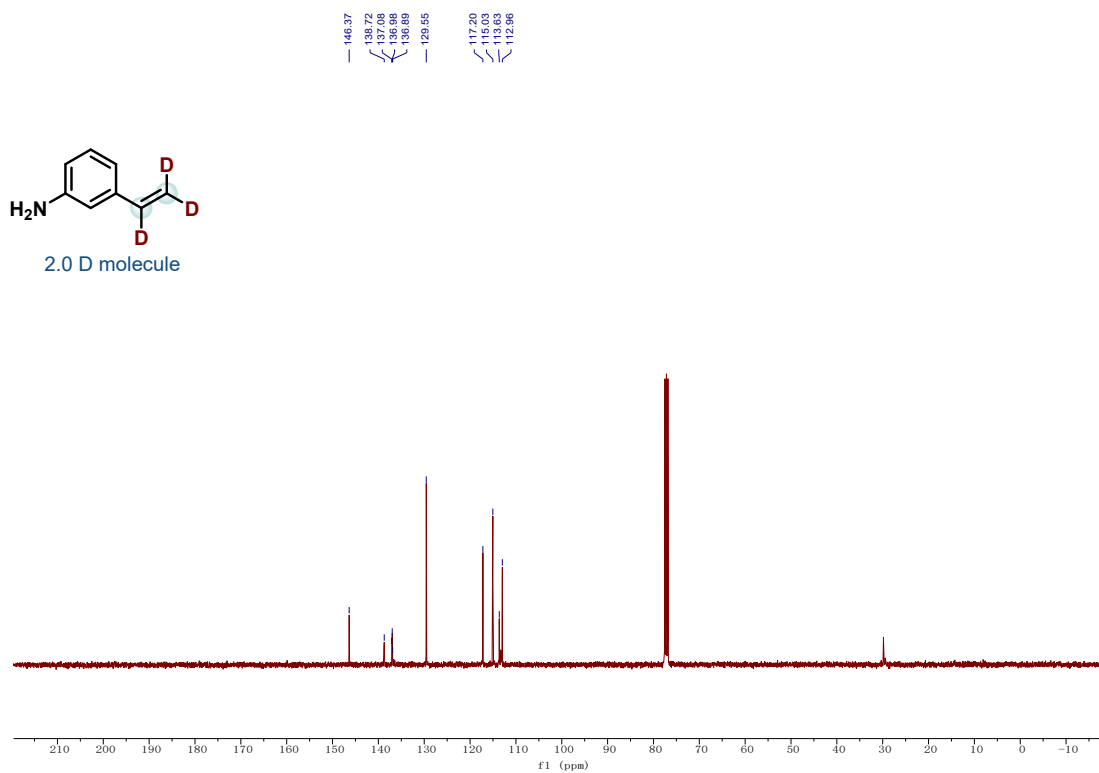

**<sup>1</sup>H NMR (400 MHz, CDCl<sub>3</sub>) spectrum of 2h**

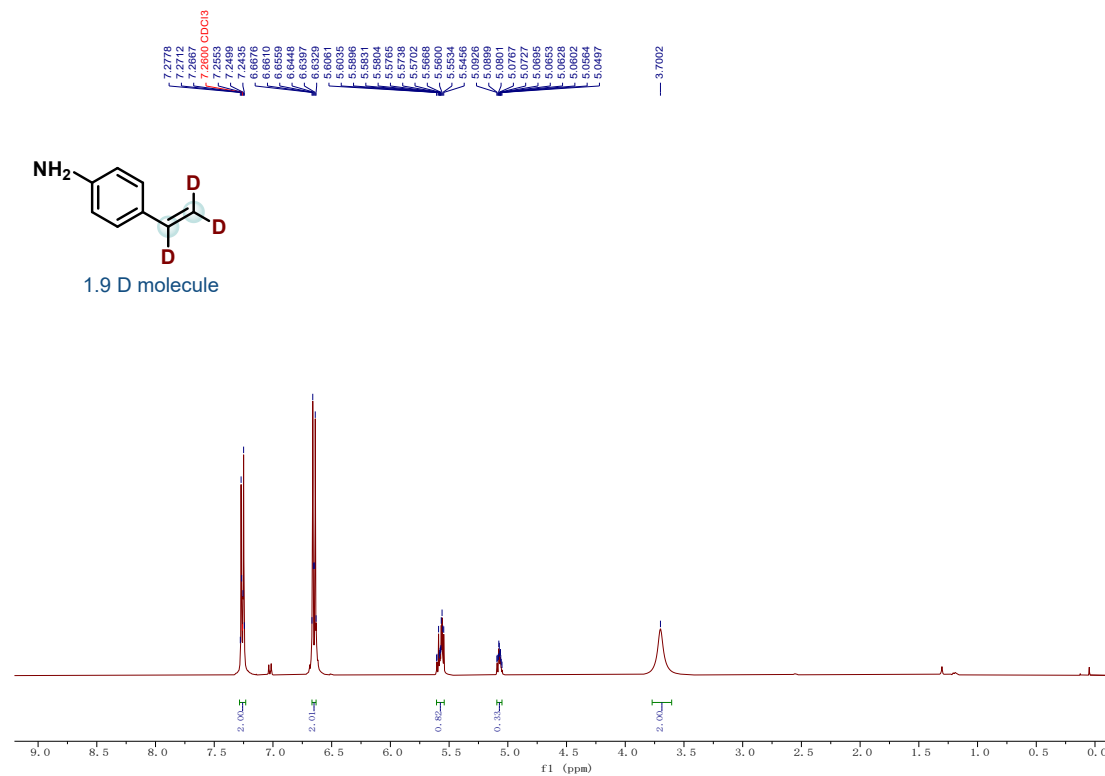

**<sup>13</sup>C NMR (101 MHz, CDCl<sub>3</sub>) spectrum of 2h**

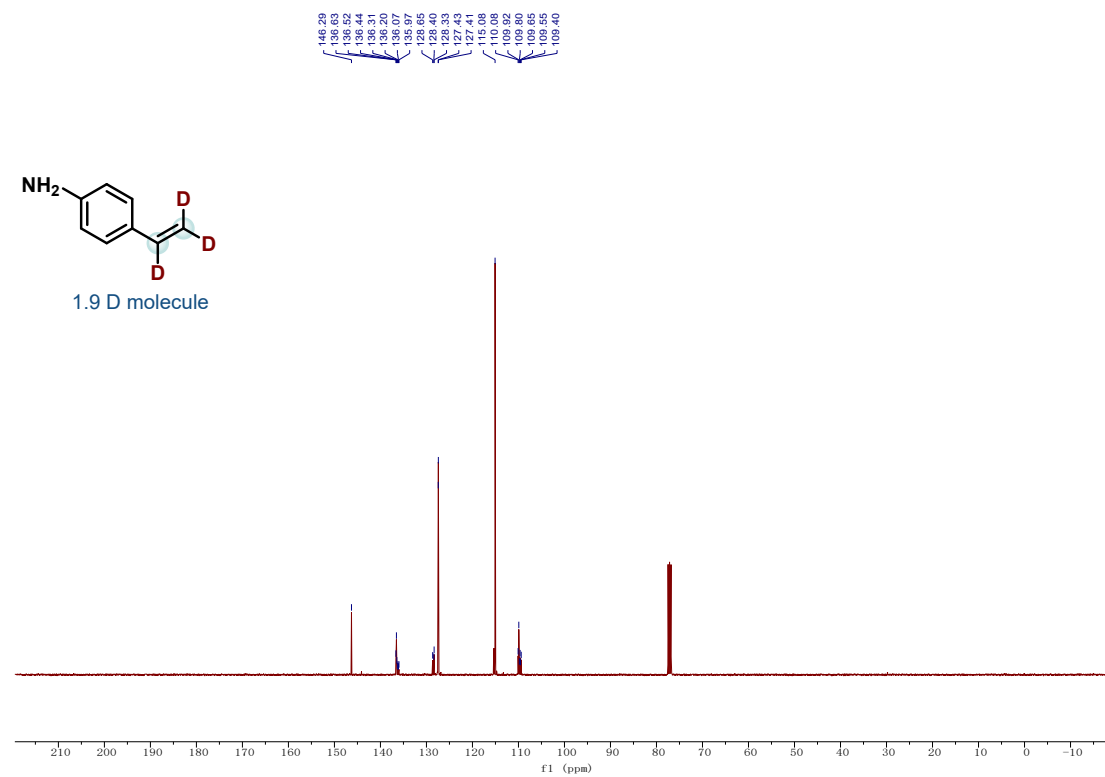

**<sup>1</sup>H NMR (400 MHz, CDCl<sub>3</sub>) spectrum of 2i**

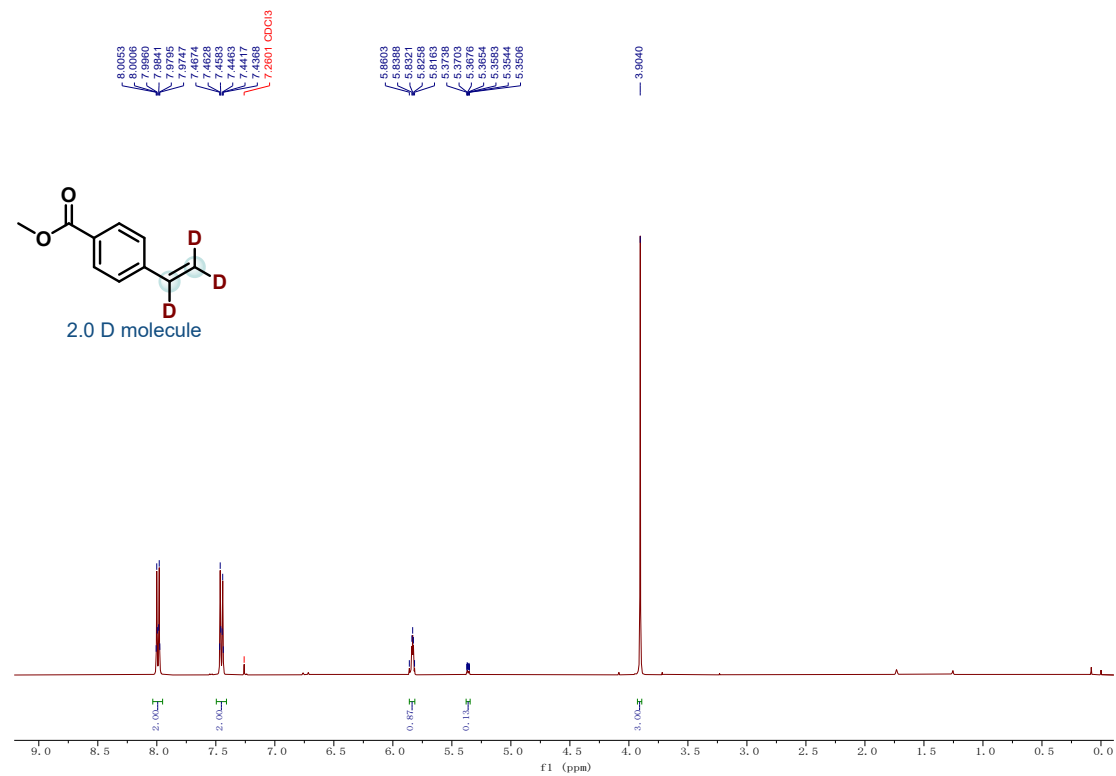

**<sup>13</sup>C NMR (101 MHz, CDCl<sub>3</sub>) spectrum of 2i**

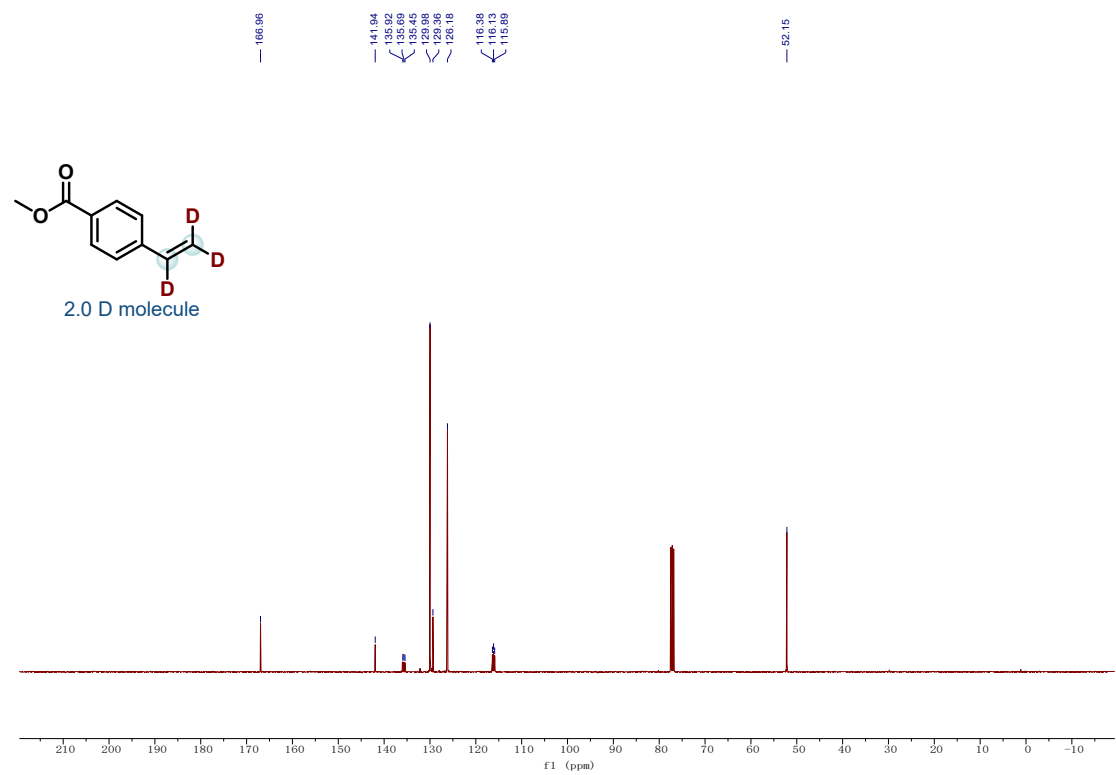

**<sup>1</sup>H NMR (400 MHz, CDCl<sub>3</sub>) spectrum of 2j**

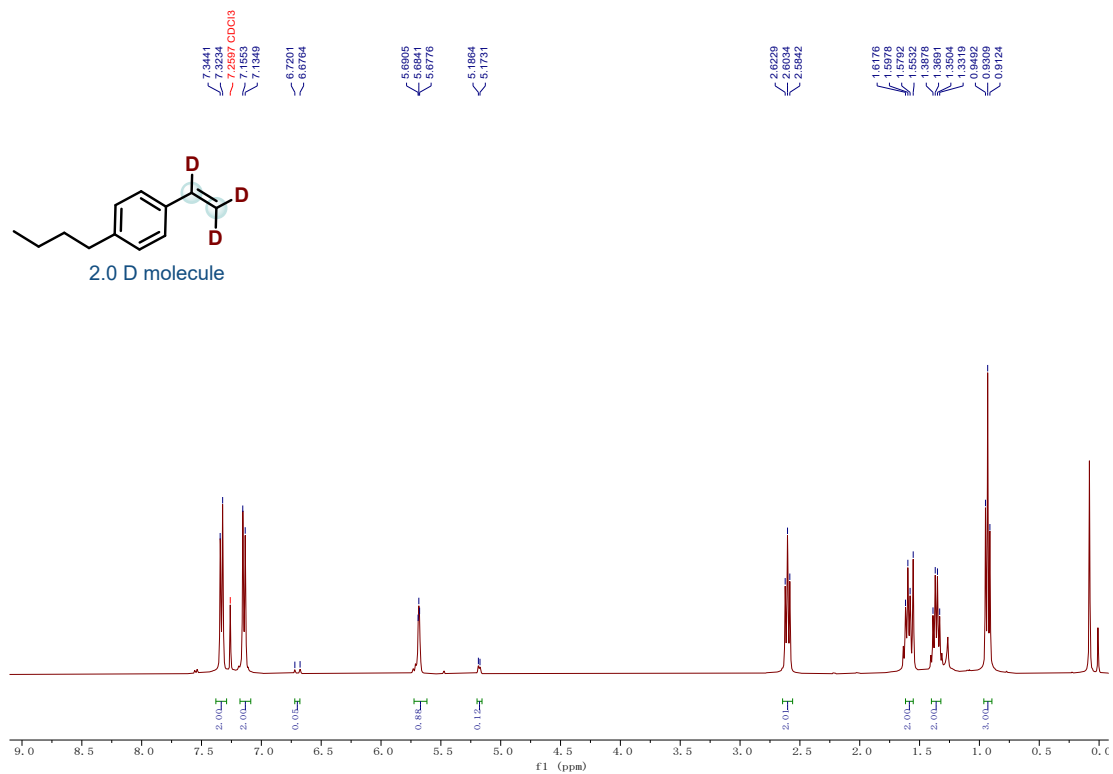

**<sup>13</sup>C NMR (101 MHz, CDCl<sub>3</sub>) spectrum of 2j**

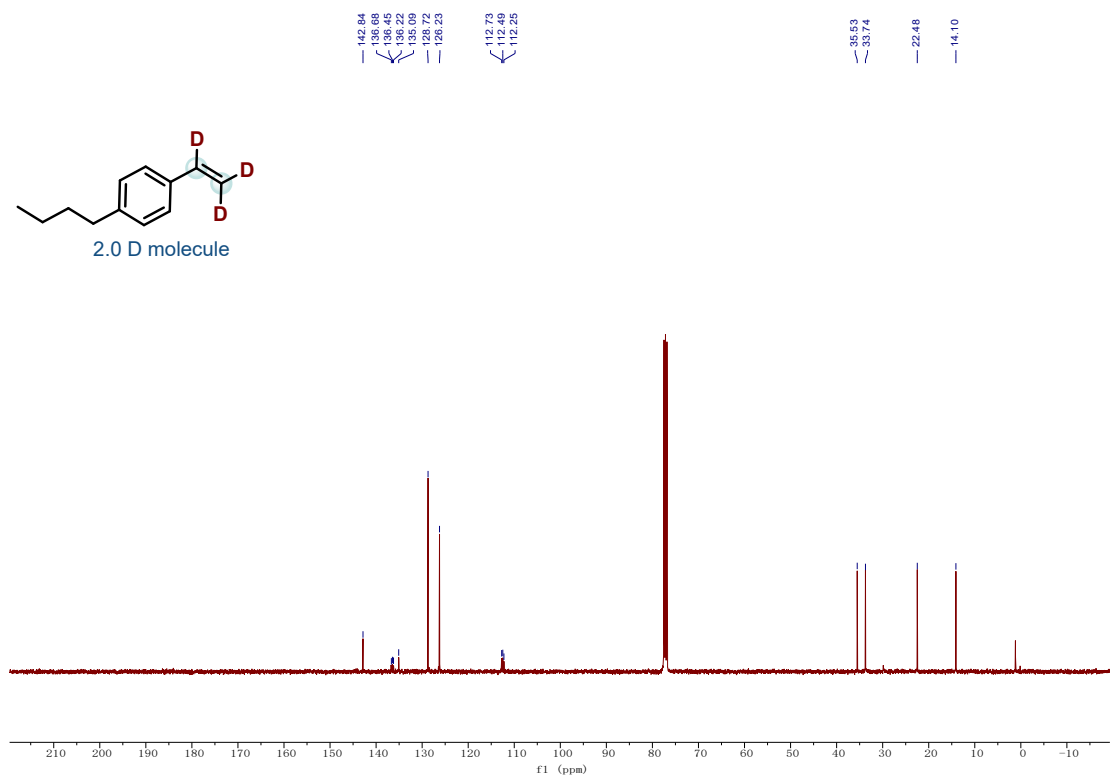

**<sup>1</sup>H NMR (400 MHz, CDCl<sub>3</sub>) spectrum of 2k**

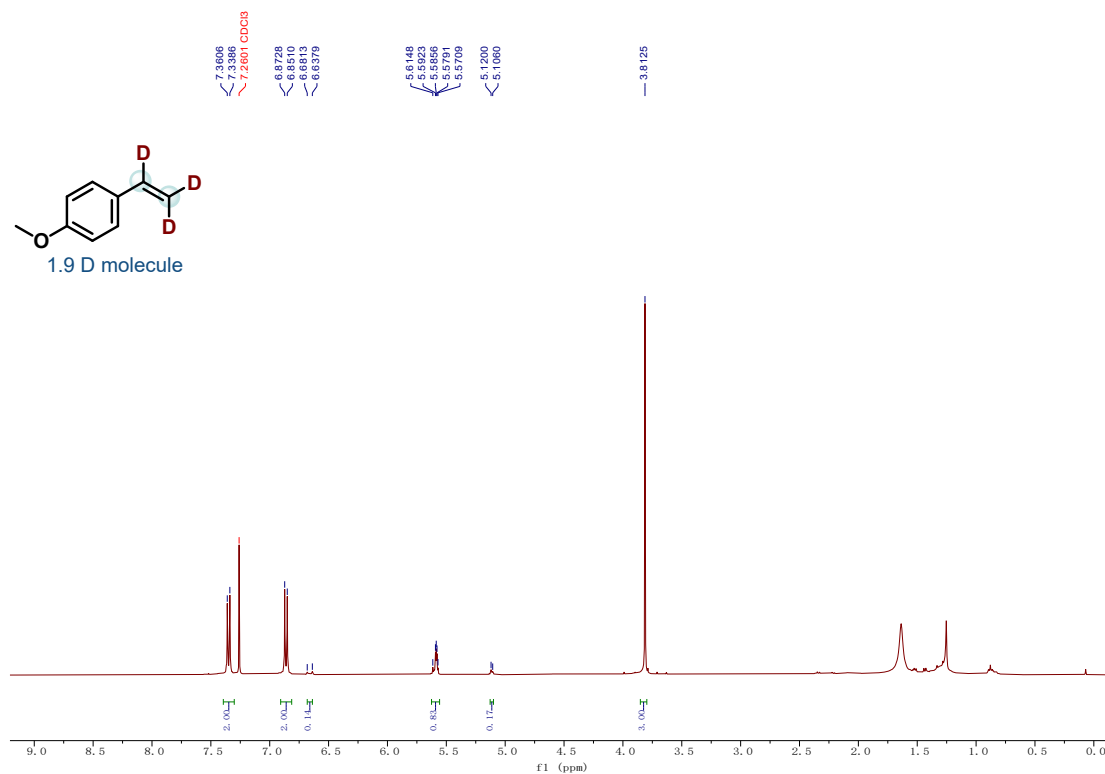

**<sup>13</sup>C NMR (101 MHz, CDCl<sub>3</sub>) spectrum of 2k**

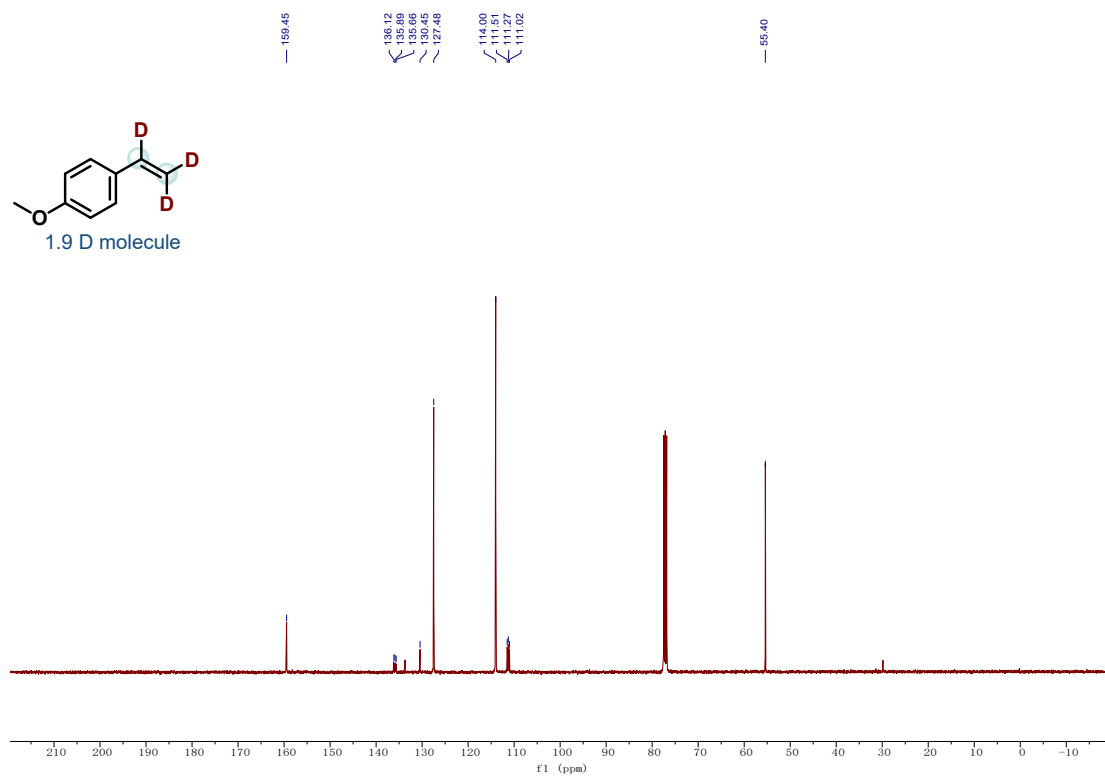

### <sup>1</sup>H NMR (400 MHz, CDCl<sub>3</sub>) spectrum of 2I

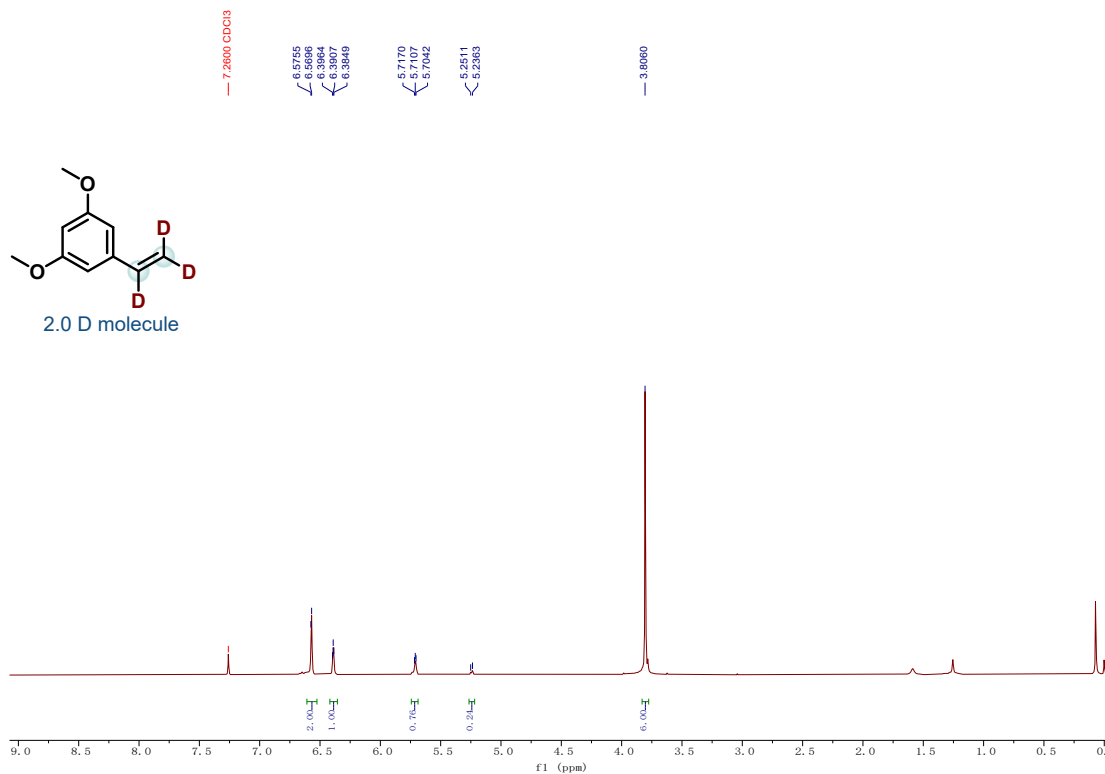

### <sup>13</sup>C NMR (101 MHz, CDCl<sub>3</sub>) spectrum of 2I

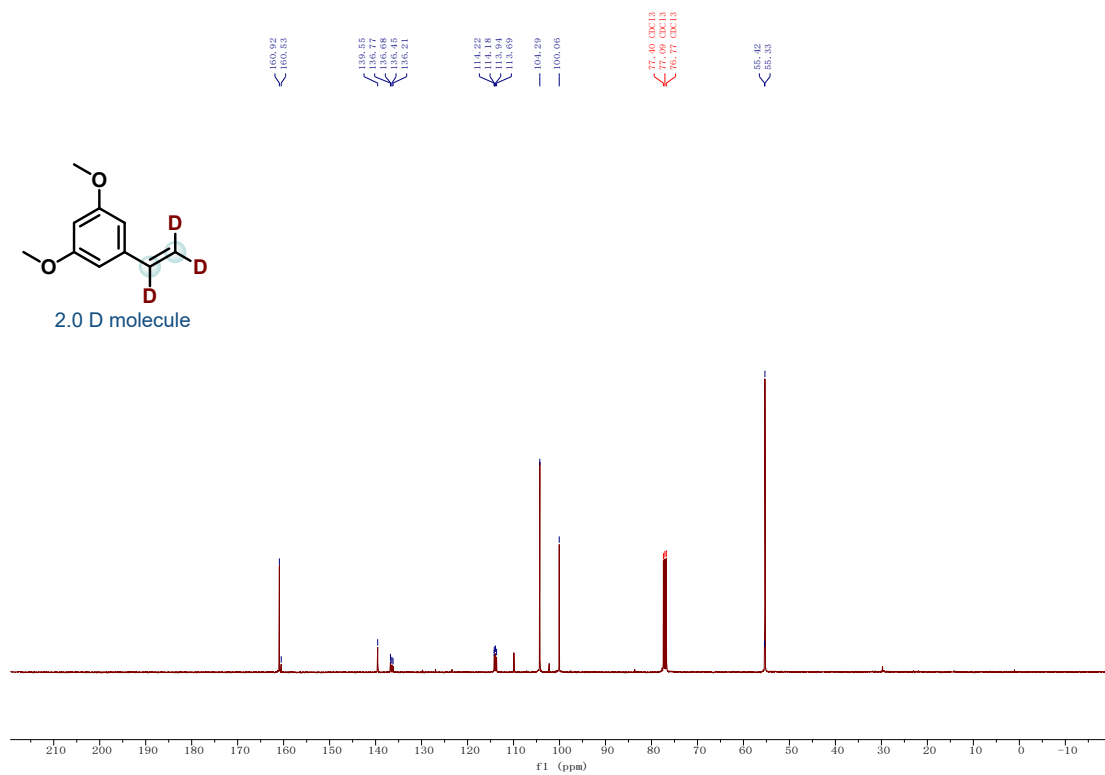

**<sup>1</sup>H NMR (400 MHz, CDCl<sub>3</sub>) spectrum of 2m**

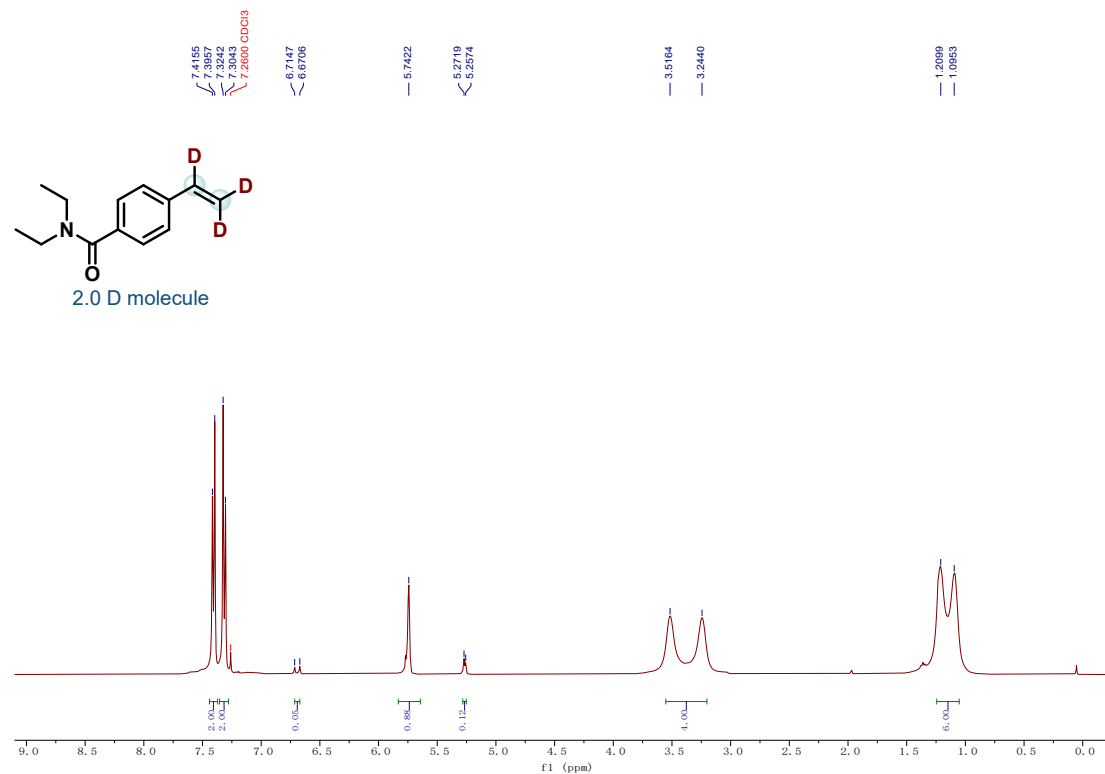

**<sup>13</sup>C NMR (101 MHz, CDCl<sub>3</sub>) spectrum of 2m**

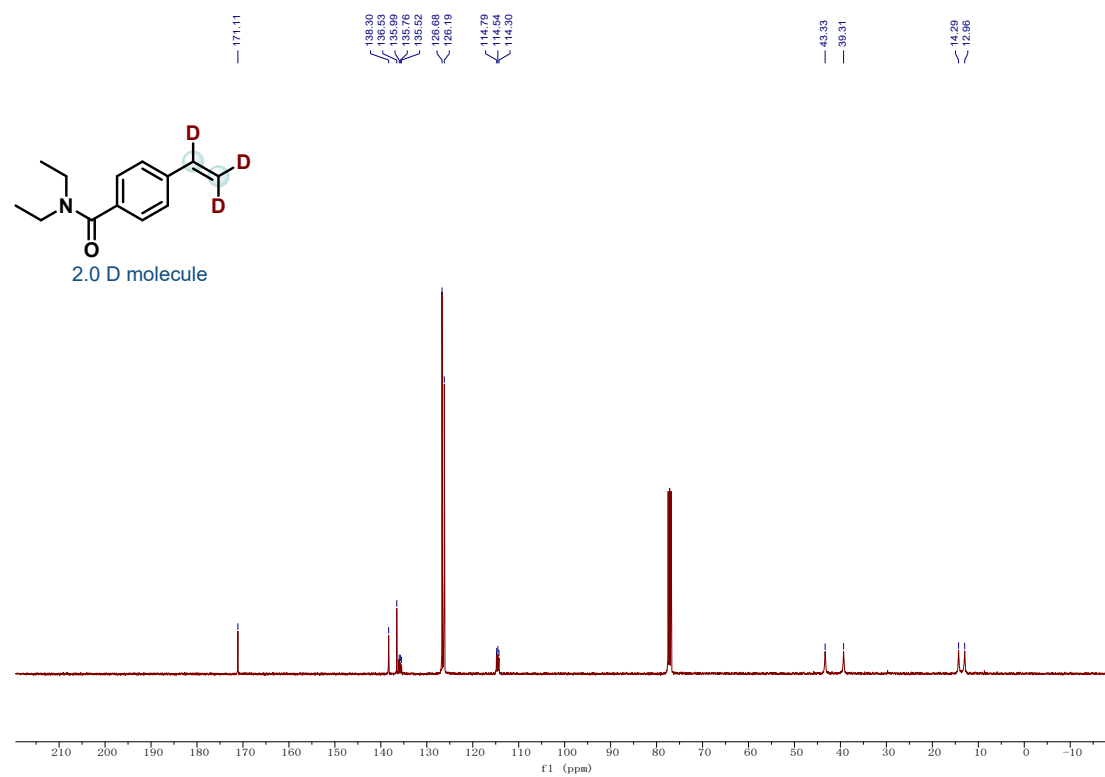

<sup>1</sup>H NMR (400 MHz, CDCl<sub>3</sub>) spectrum of 2n

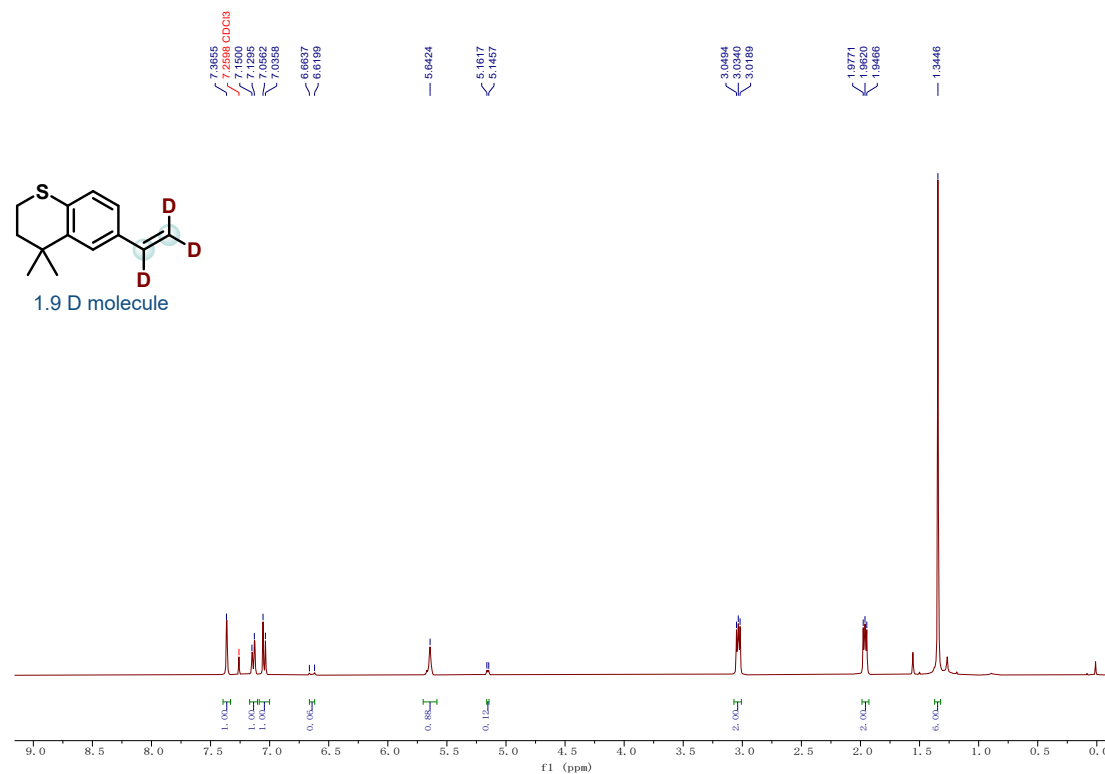

<sup>13</sup>C NMR (101 MHz, CDCl<sub>3</sub>) spectrum of 2n

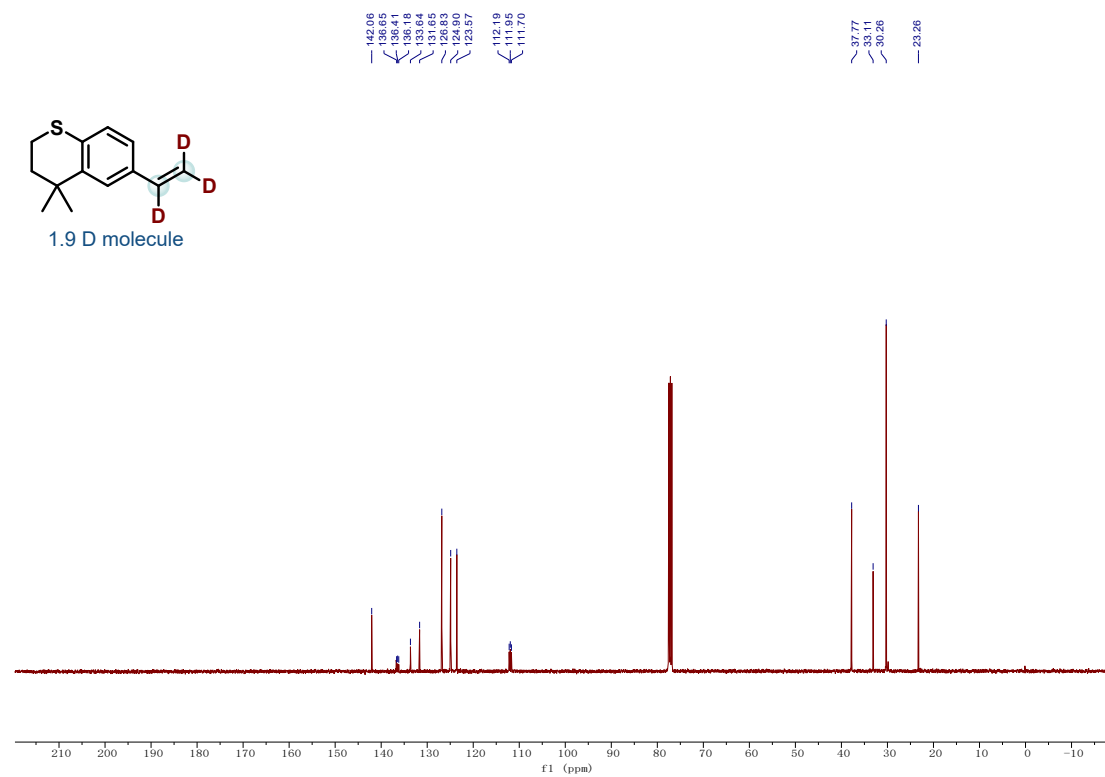

**<sup>1</sup>H NMR (400 MHz, CDCl<sub>3</sub>) spectrum of 2o**

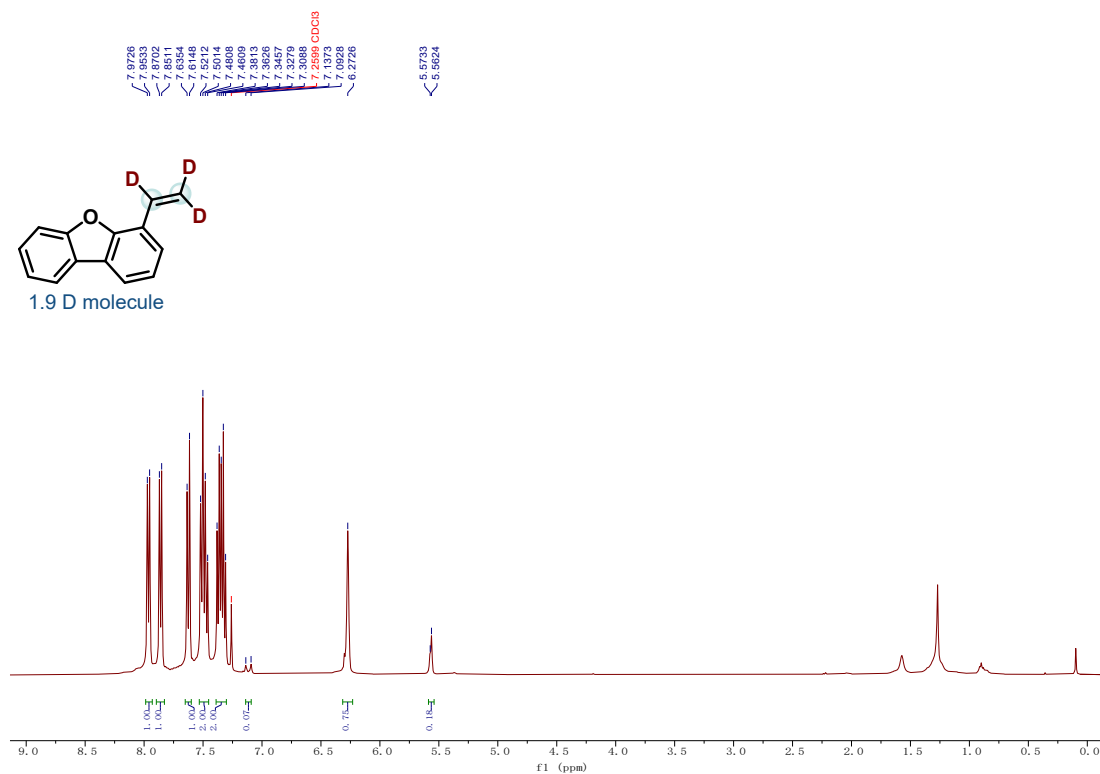

**<sup>13</sup>C NMR (101 MHz, CDCl<sub>3</sub>) spectrum of 2o**

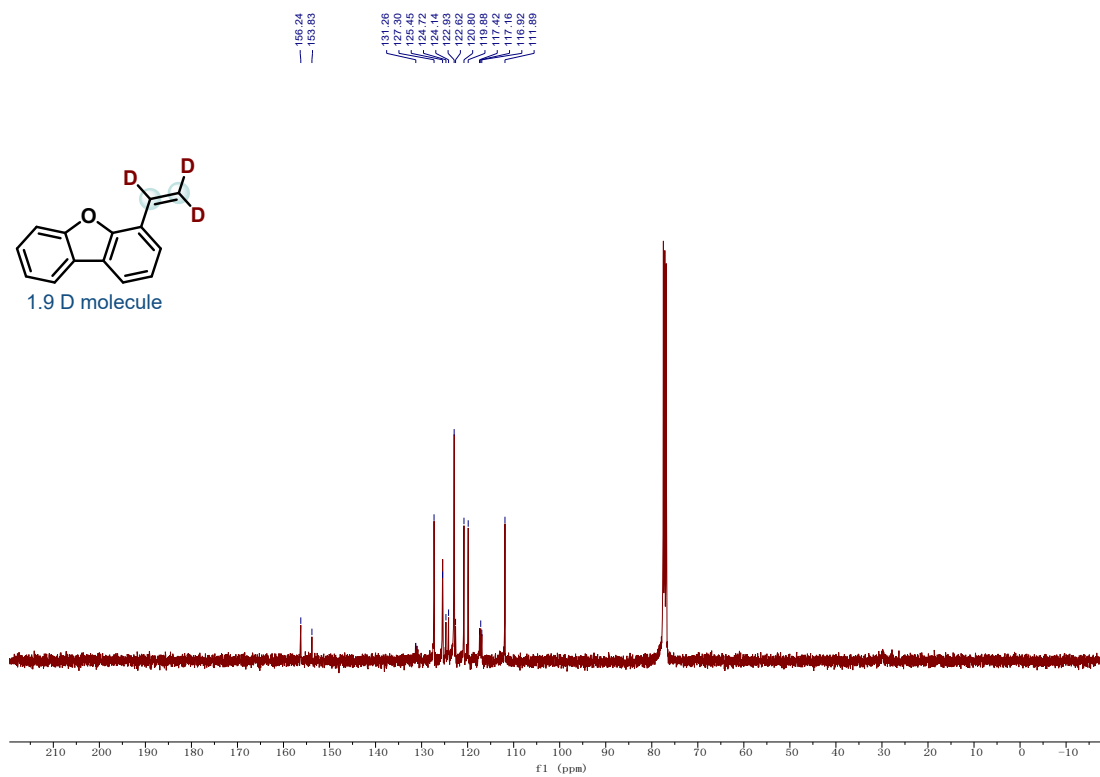

**<sup>1</sup>H NMR (400 MHz, CDCl<sub>3</sub>) spectrum of 2p**

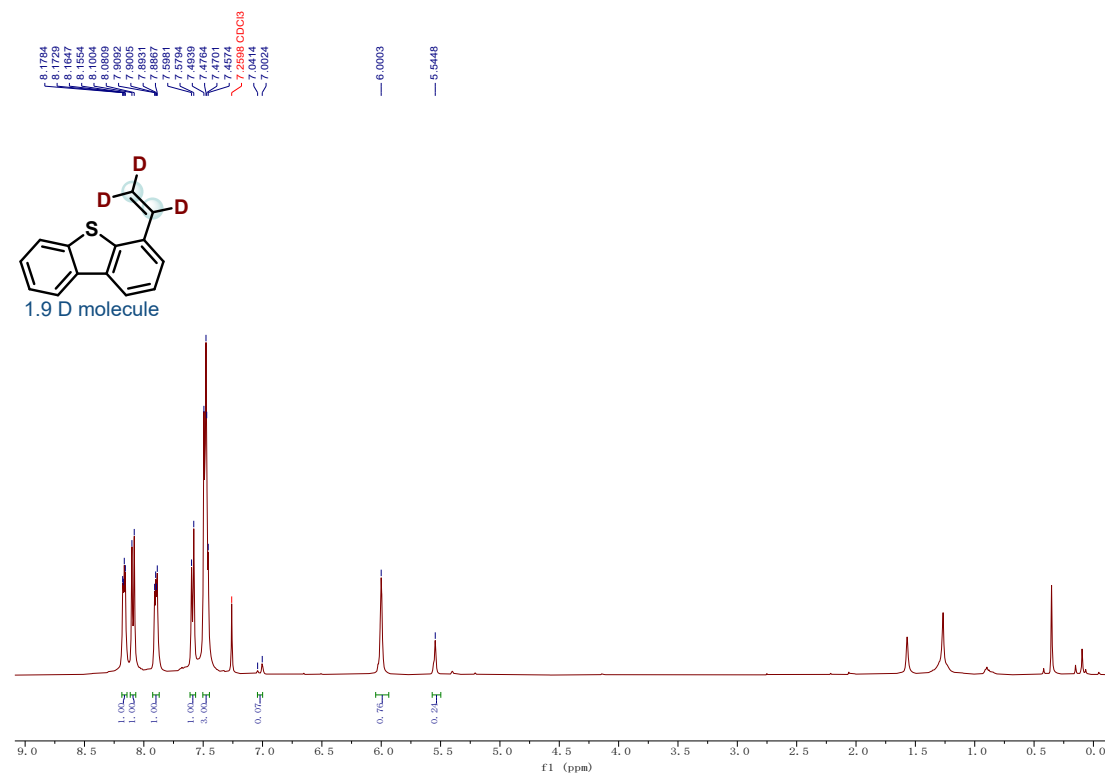

**<sup>13</sup>C NMR (101 MHz, CDCl<sub>3</sub>) spectrum of 2p**

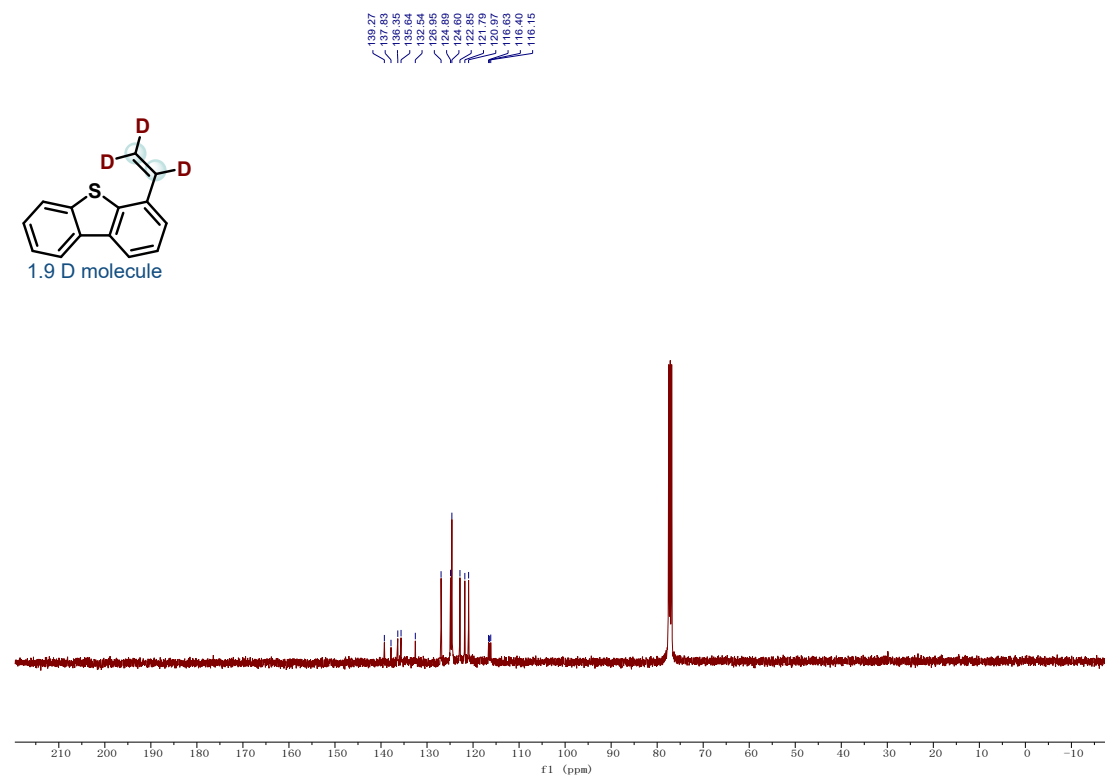

**<sup>1</sup>H NMR (400 MHz, CDCl<sub>3</sub>) spectrum of 2q**

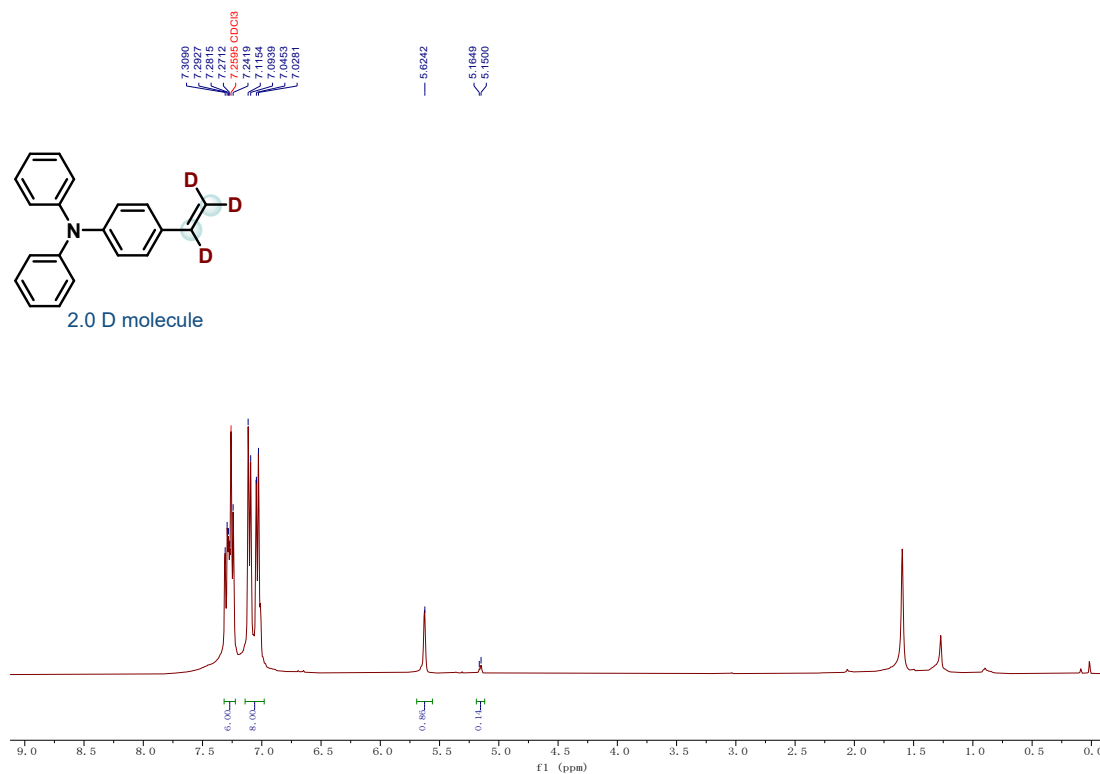

**<sup>13</sup>C NMR (101 MHz, CDCl<sub>3</sub>) spectrum of 2q**

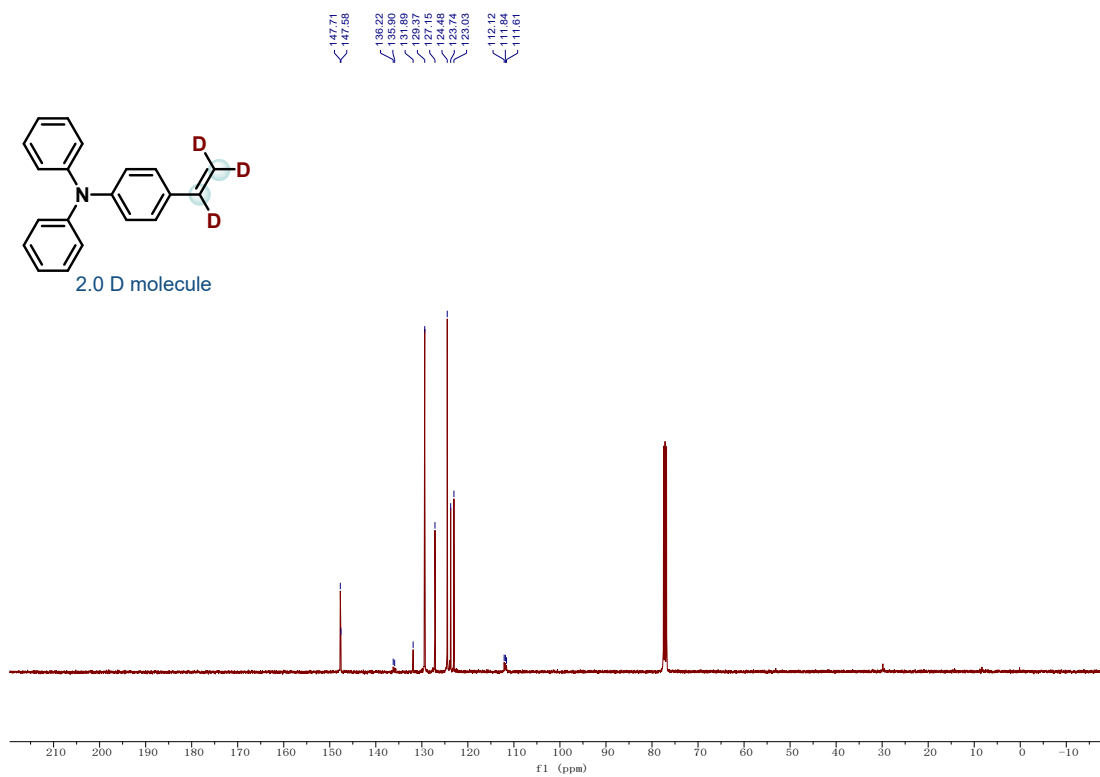

**<sup>1</sup>H NMR (400 MHz, CDCl<sub>3</sub>) spectrum of 2r**

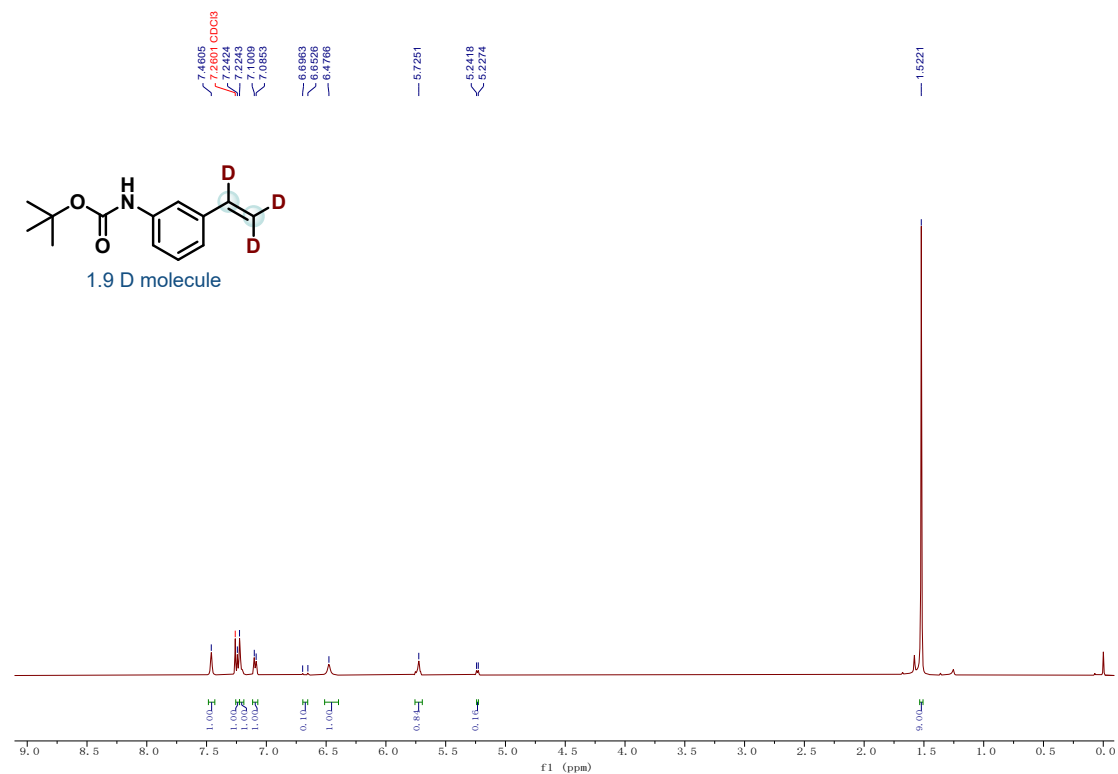

**<sup>13</sup>C NMR (101 MHz, CDCl<sub>3</sub>) spectrum of 2r**

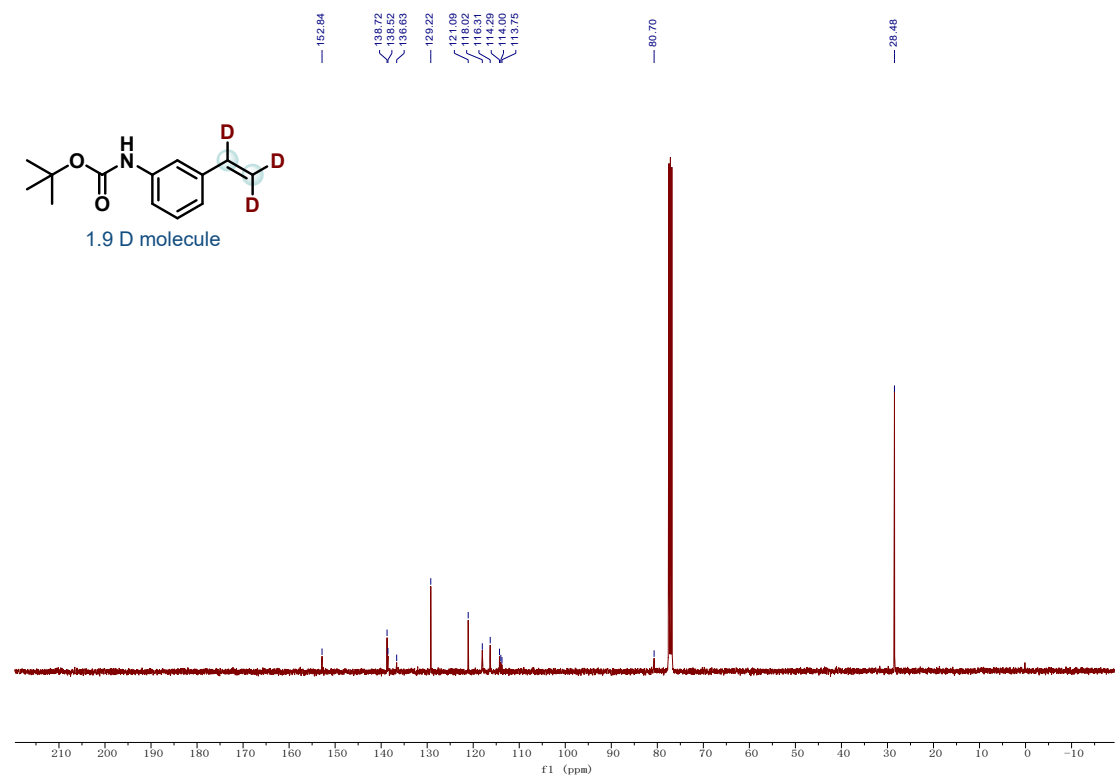

**<sup>1</sup>H NMR (400 MHz, CDCl<sub>3</sub>) spectrum of 2s**

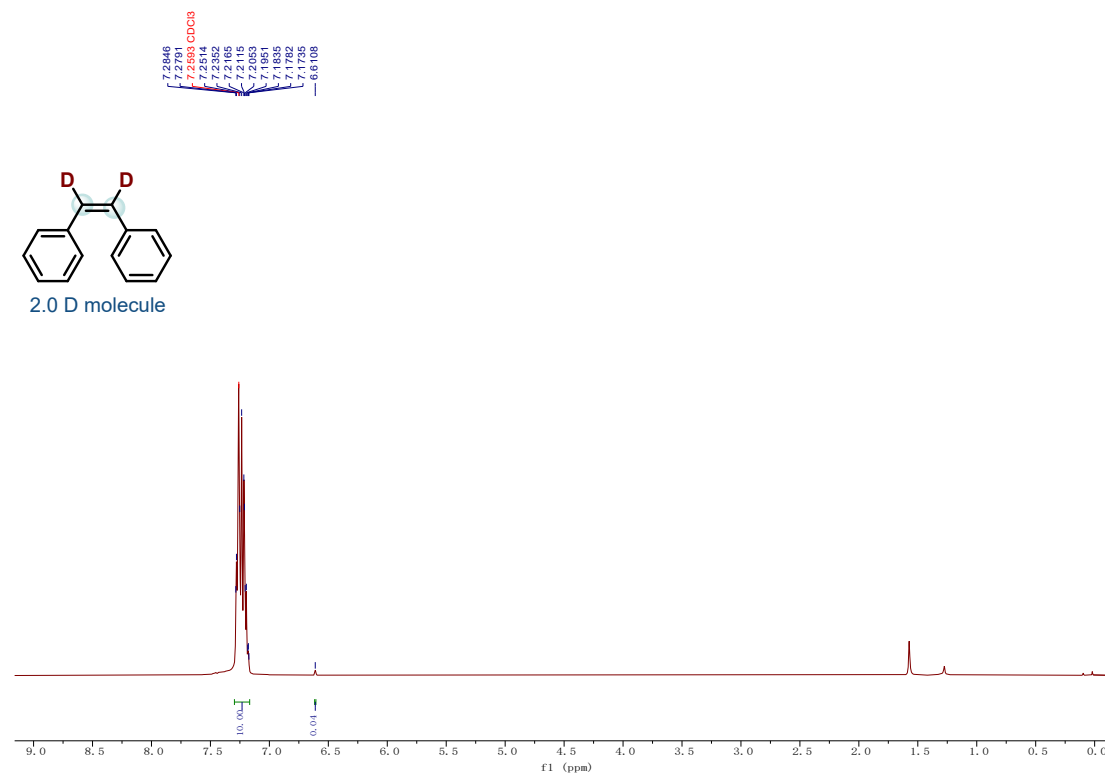

**<sup>13</sup>C NMR (101 MHz, CDCl<sub>3</sub>) spectrum of 2s**

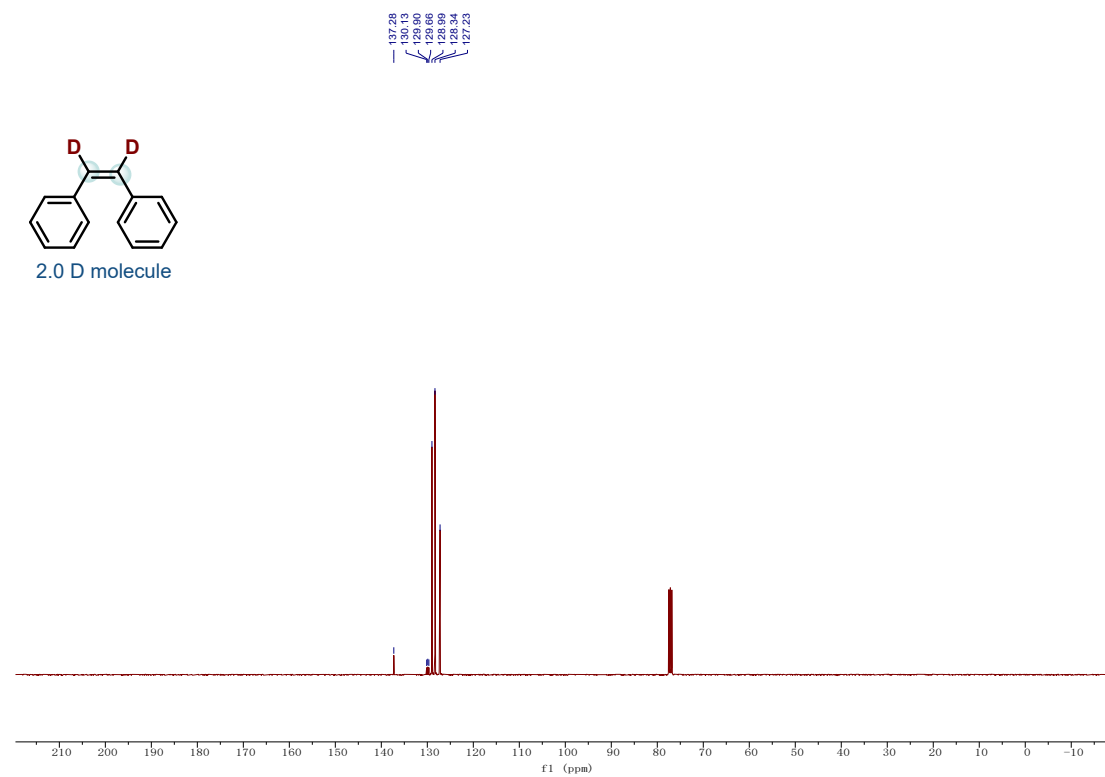

**<sup>1</sup>H NMR (400 MHz, CDCl<sub>3</sub>) spectrum of 2t**

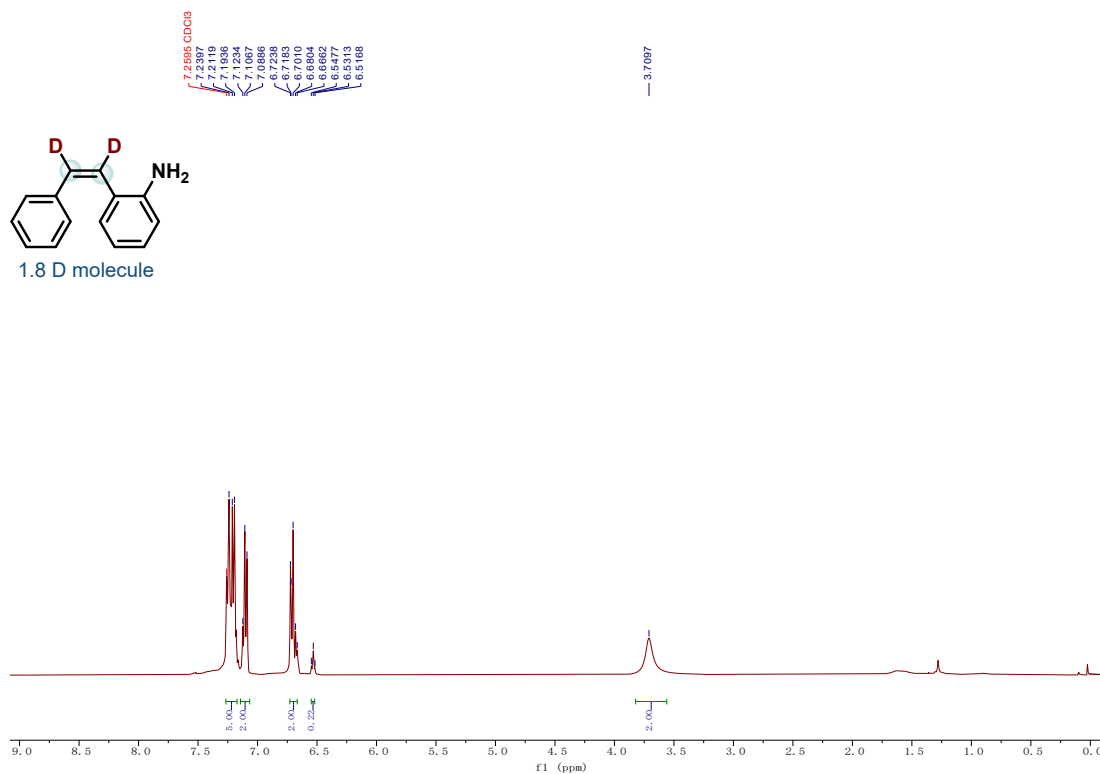

**<sup>13</sup>C NMR (101 MHz, CDCl<sub>3</sub>) spectrum of 2t**

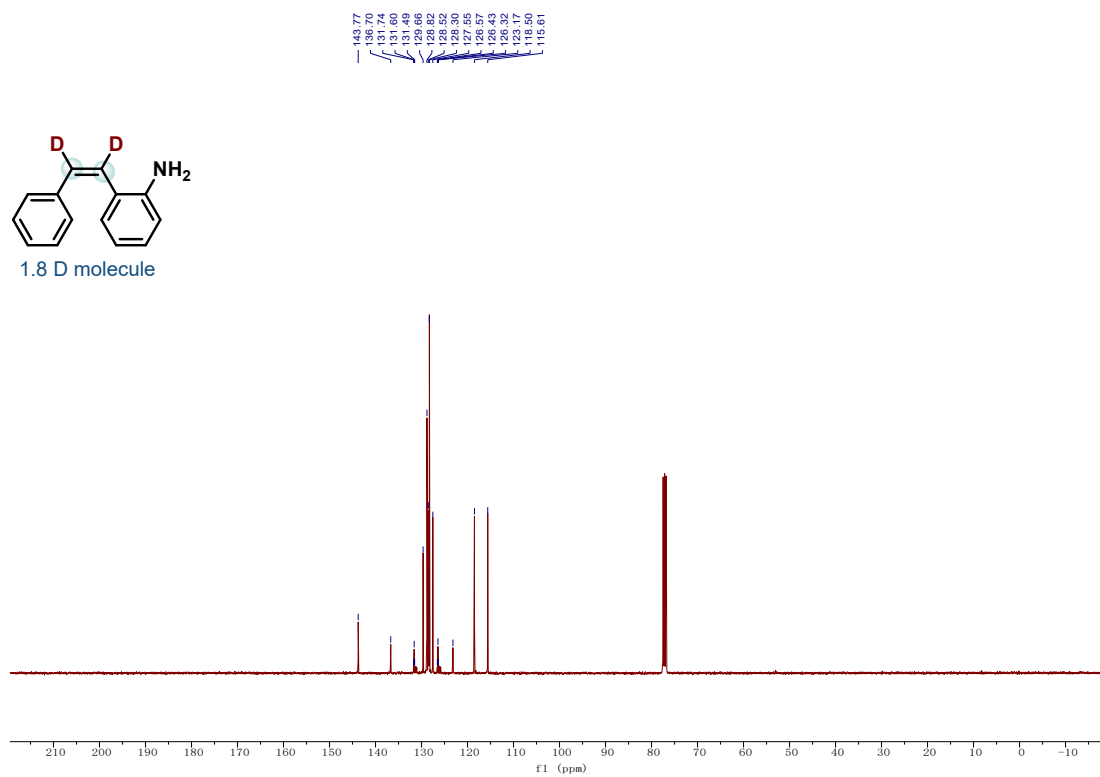

**<sup>1</sup>H NMR (400 MHz, CDCl<sub>3</sub>) spectrum of 2u**

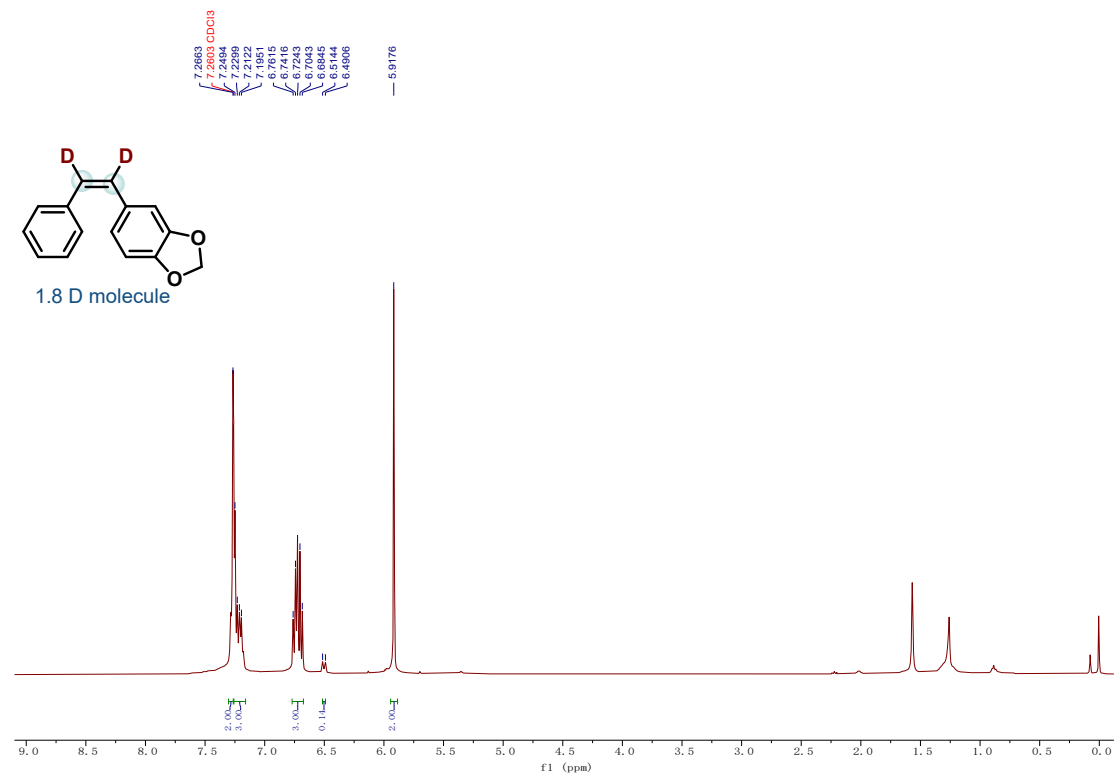

**<sup>13</sup>C NMR (101 MHz, CDCl<sub>3</sub>) spectrum of 2u**

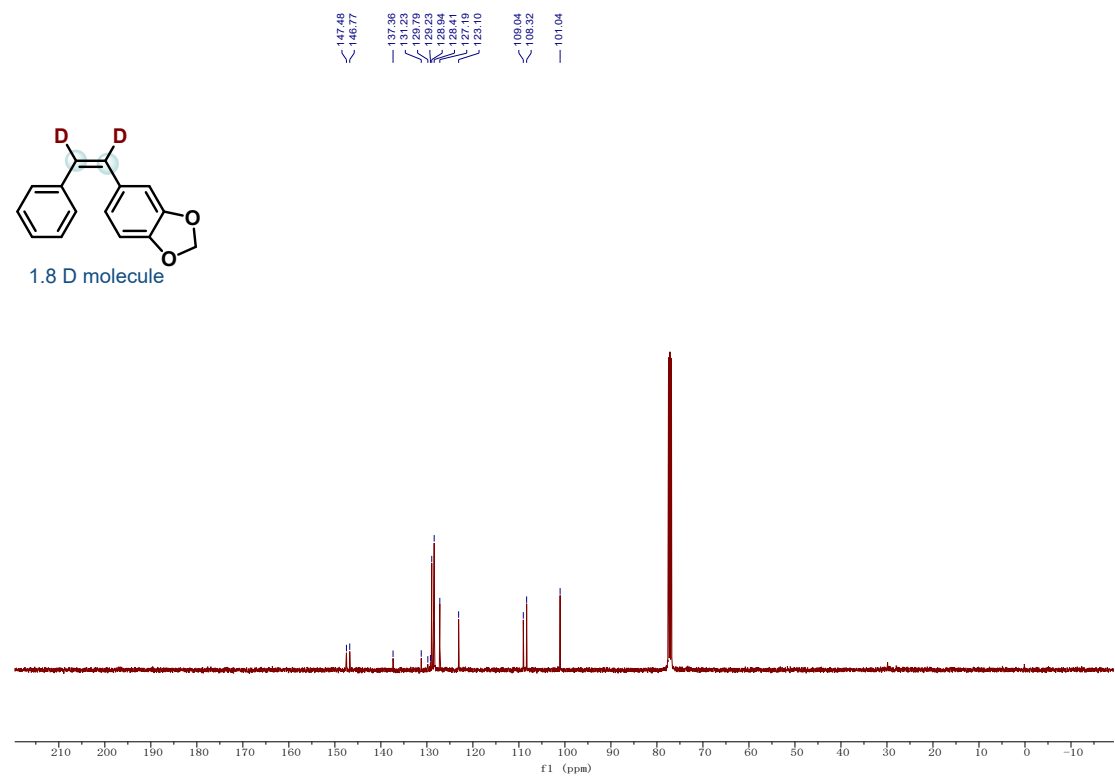

**<sup>1</sup>H NMR (400 MHz, CDCl<sub>3</sub>) spectrum of 2v**

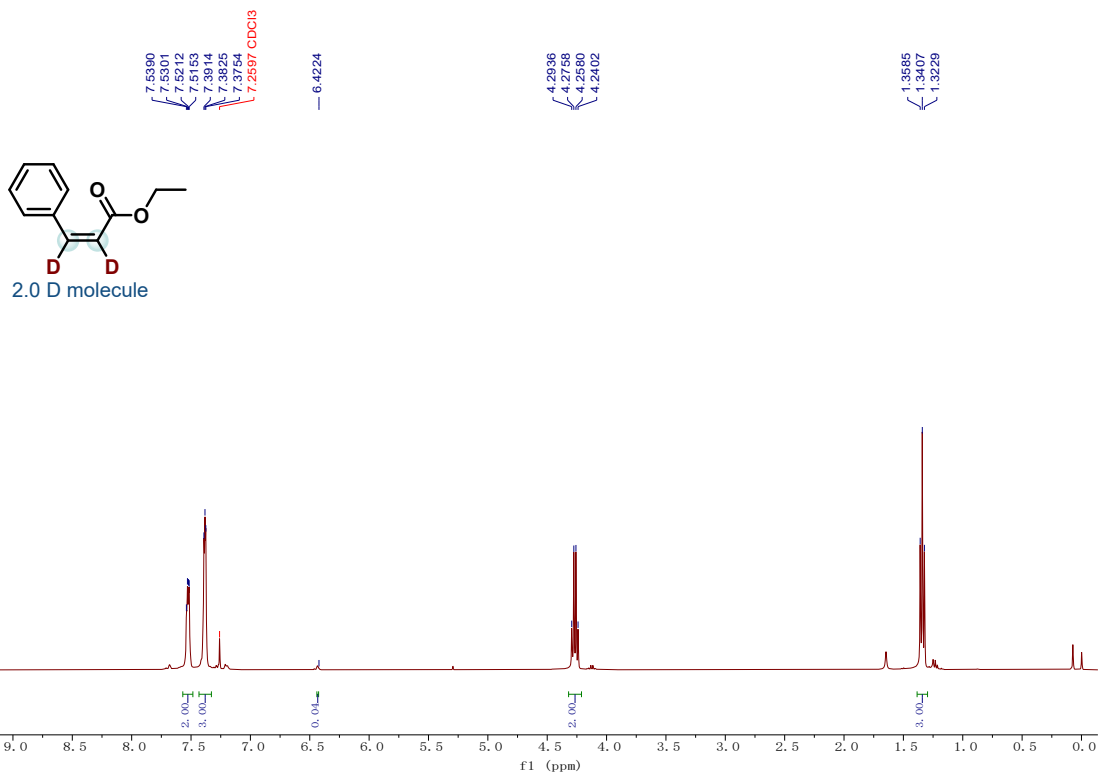

**<sup>13</sup>C NMR (101 MHz, CDCl<sub>3</sub>) spectrum of 2v**

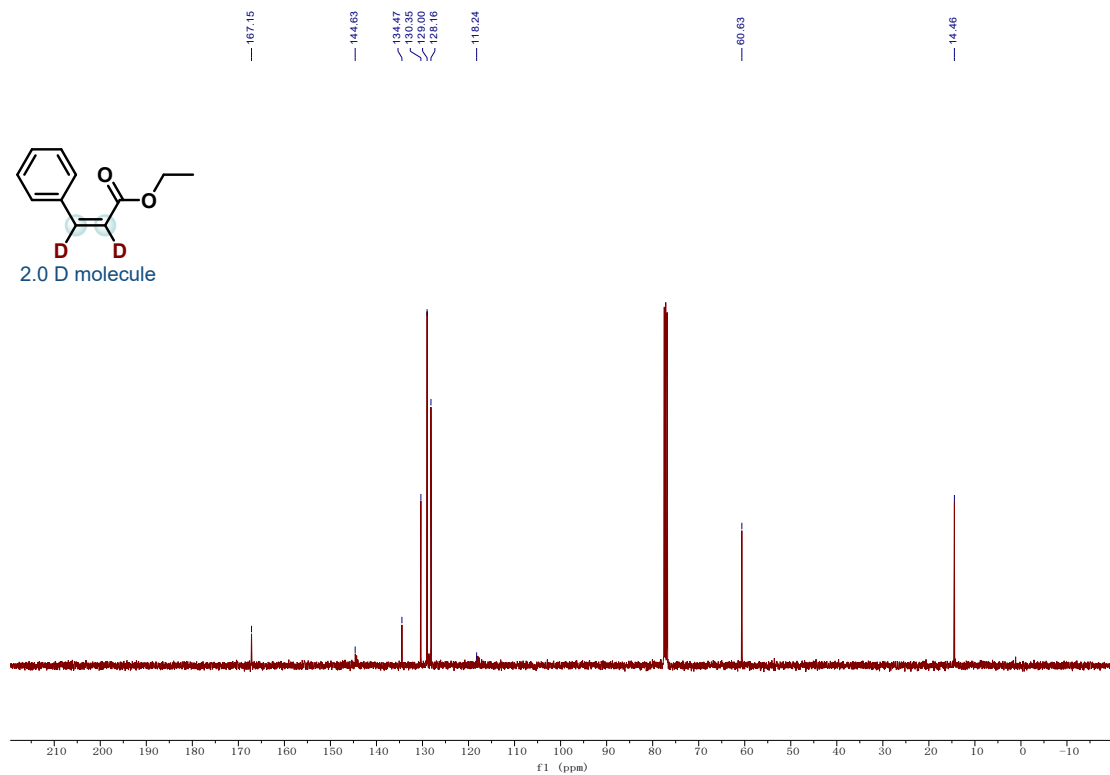

<sup>1</sup>H NMR (400 MHz, CDCl<sub>3</sub>) spectrum of 2w

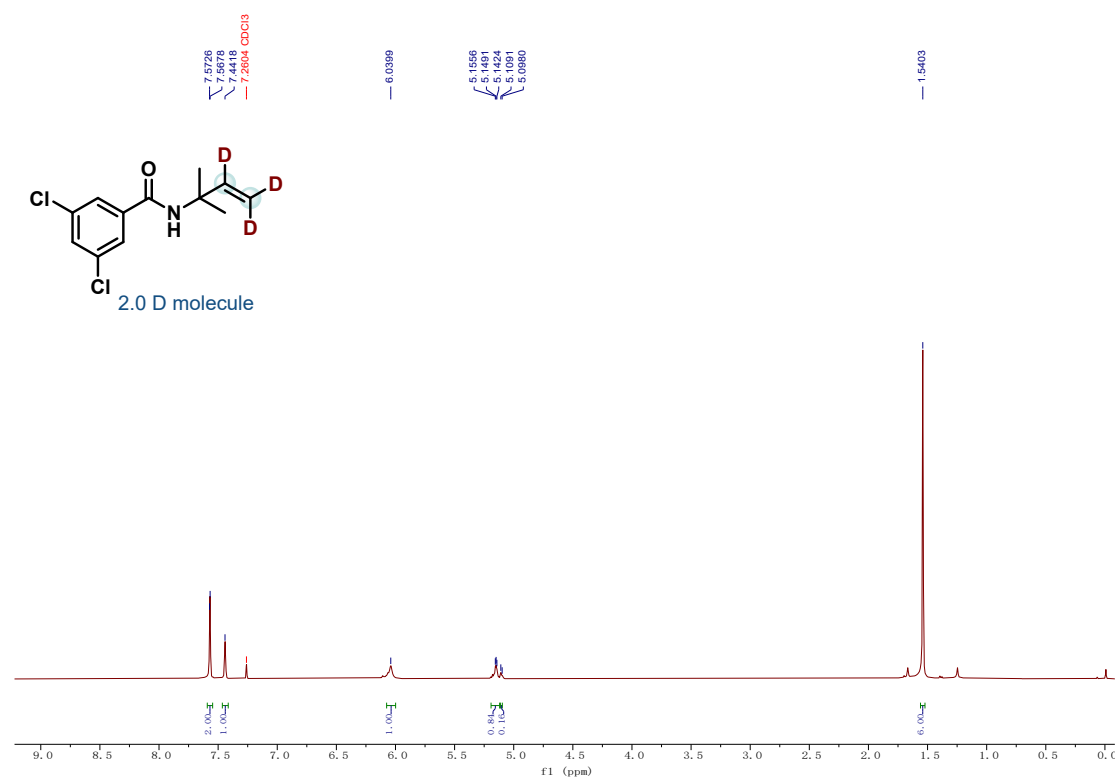

<sup>13</sup>C NMR (101 MHz, CDCl<sub>3</sub>) spectrum of 2w

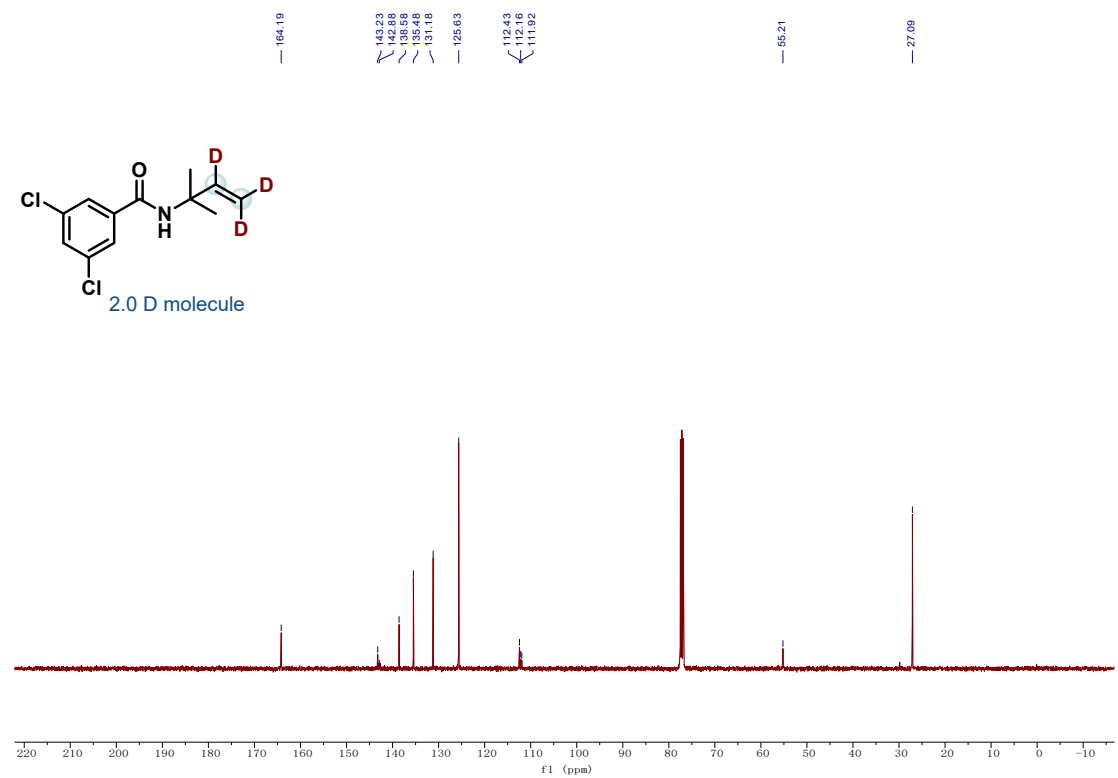

**<sup>1</sup>H NMR (400 MHz, CDCl<sub>3</sub>) spectrum of 2x**

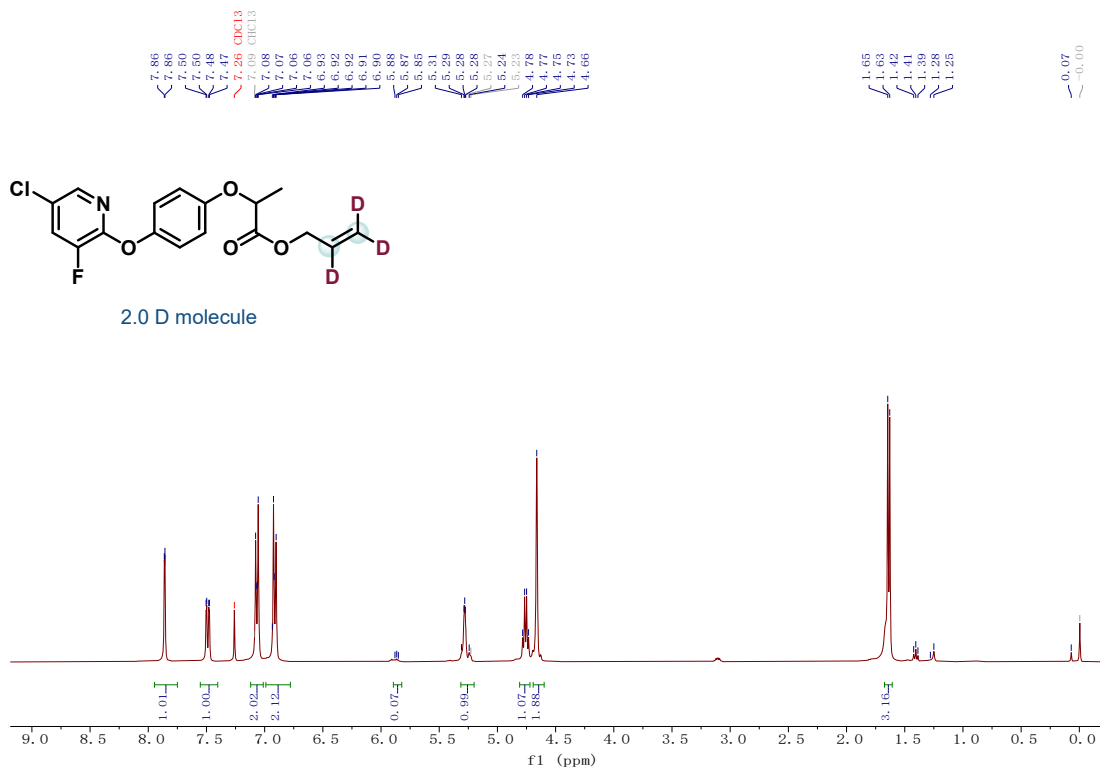

**<sup>19</sup>F NMR (376 MHz, CDCl<sub>3</sub>) spectrum of 2x**

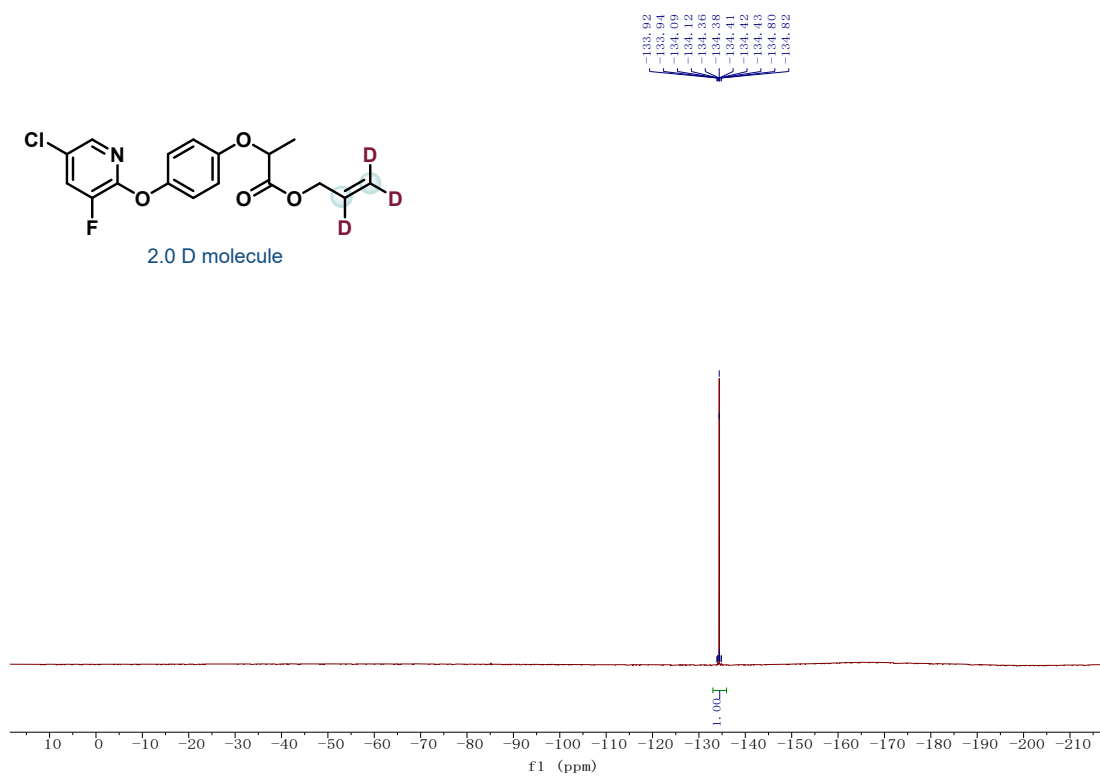

**<sup>13</sup>C NMR (101 MHz, CDCl<sub>3</sub>) spectrum of 2x**

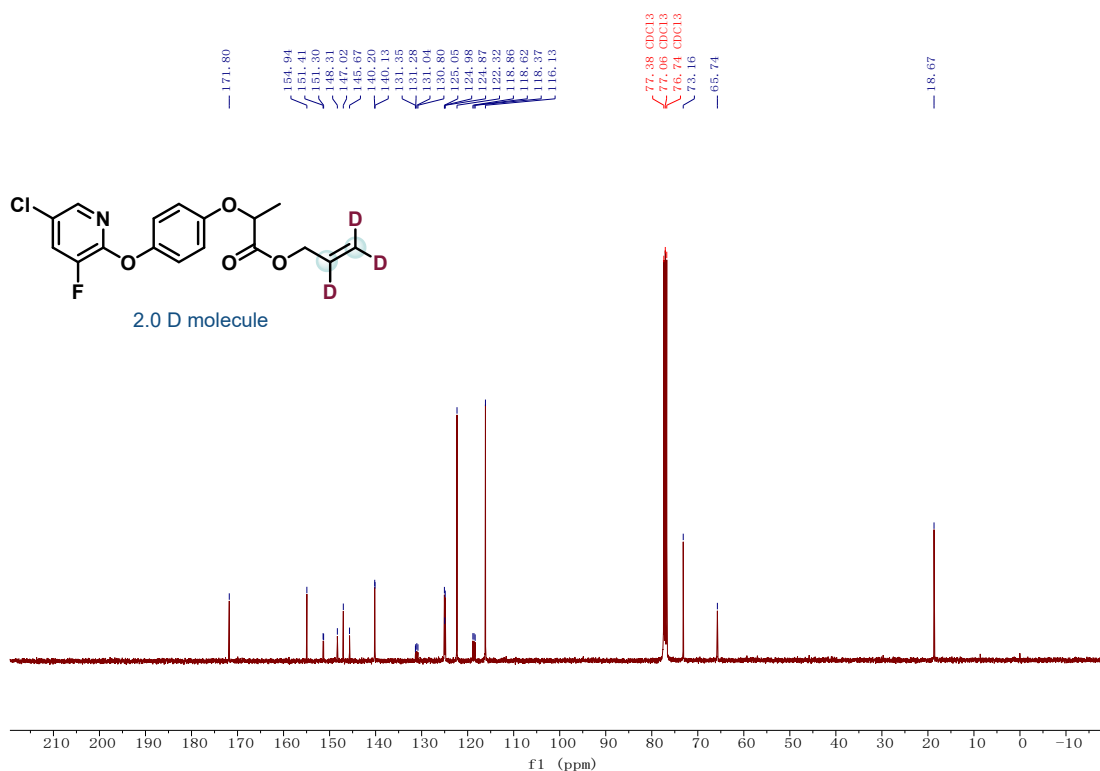

**<sup>1</sup>H NMR (400 MHz, CDCl<sub>3</sub>) spectrum of 2y**

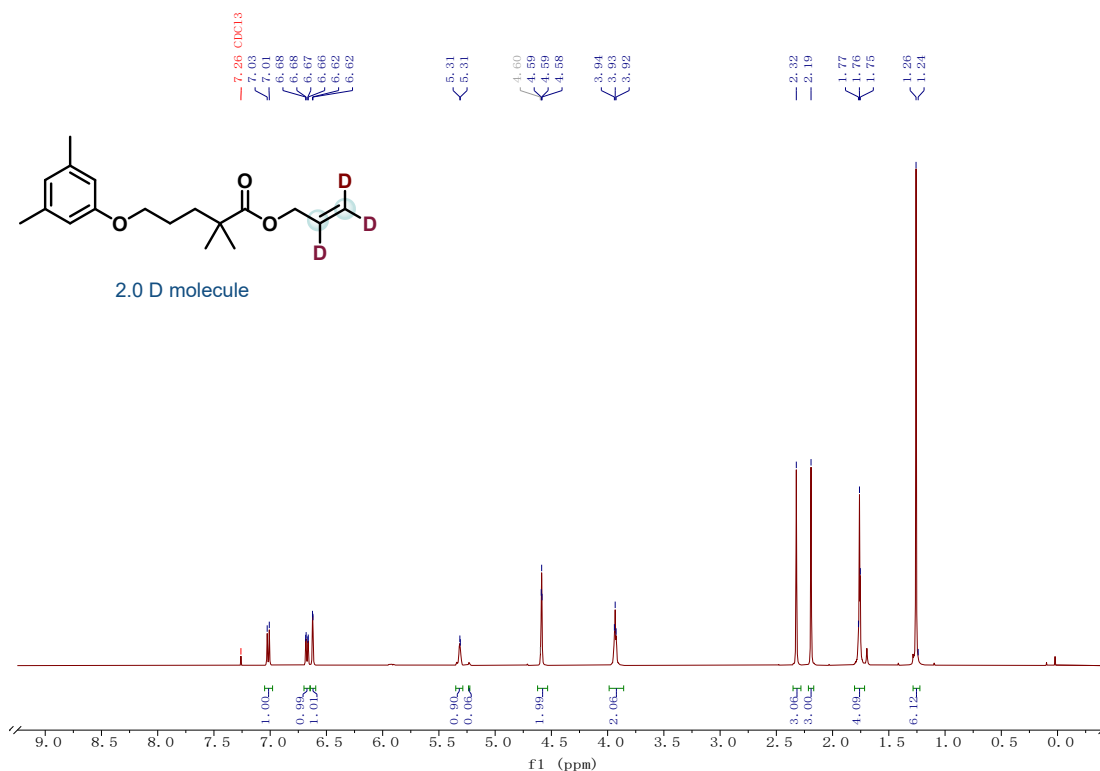

**<sup>13</sup>C NMR (101 MHz, CDCl<sub>3</sub>) spectrum of 2y**

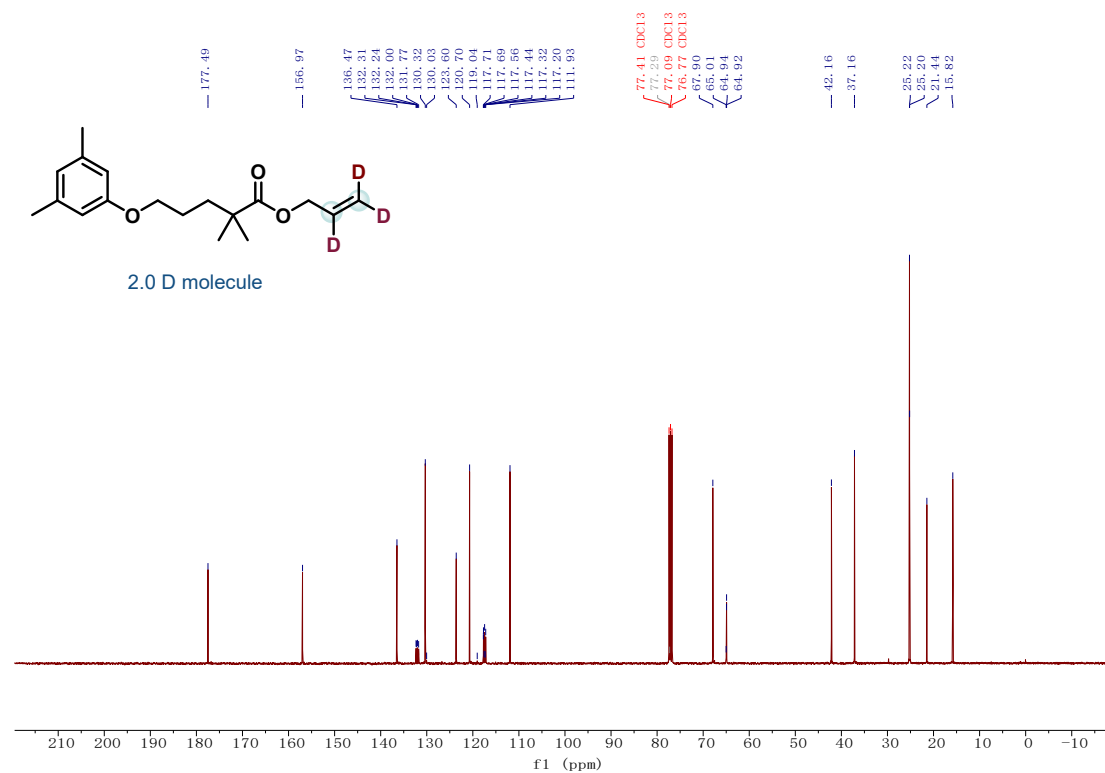

**<sup>1</sup>H NMR (400 MHz, CDCl<sub>3</sub>) spectrum of 2z**

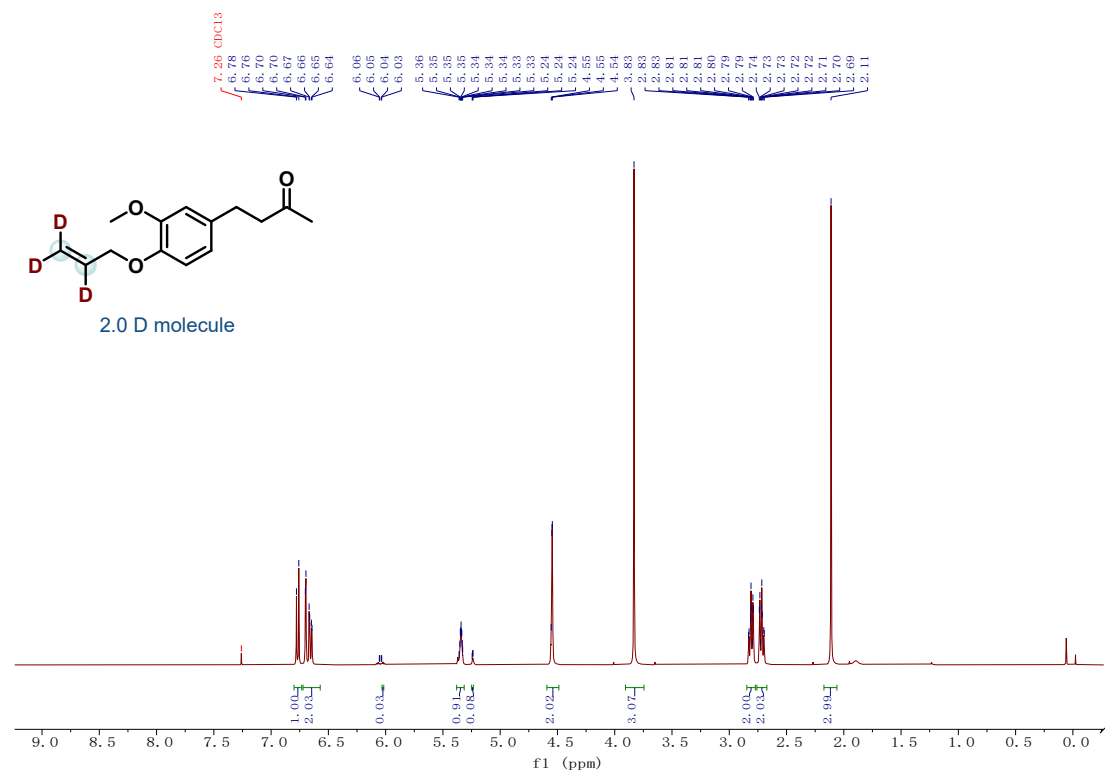

**<sup>13</sup>C NMR (101 MHz, CDCl<sub>3</sub>) spectrum of 2z**

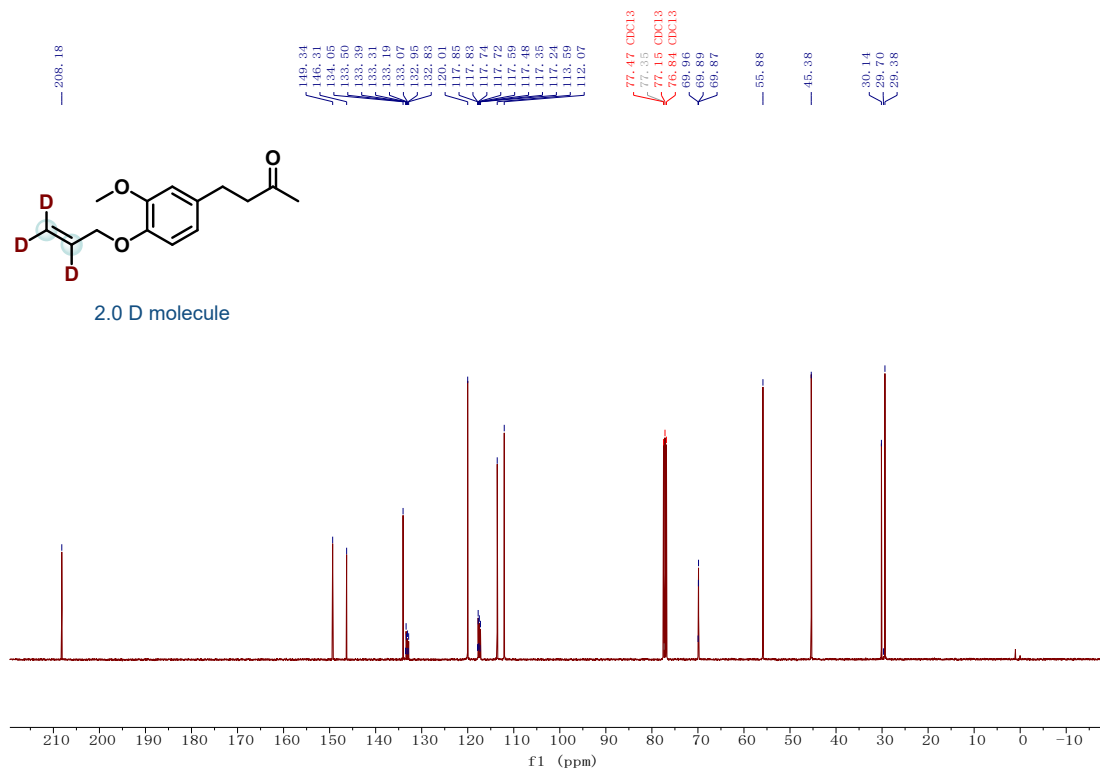

<sup>1</sup>H NMR (400 MHz, CDCl<sub>3</sub>) spectrum of 2aa

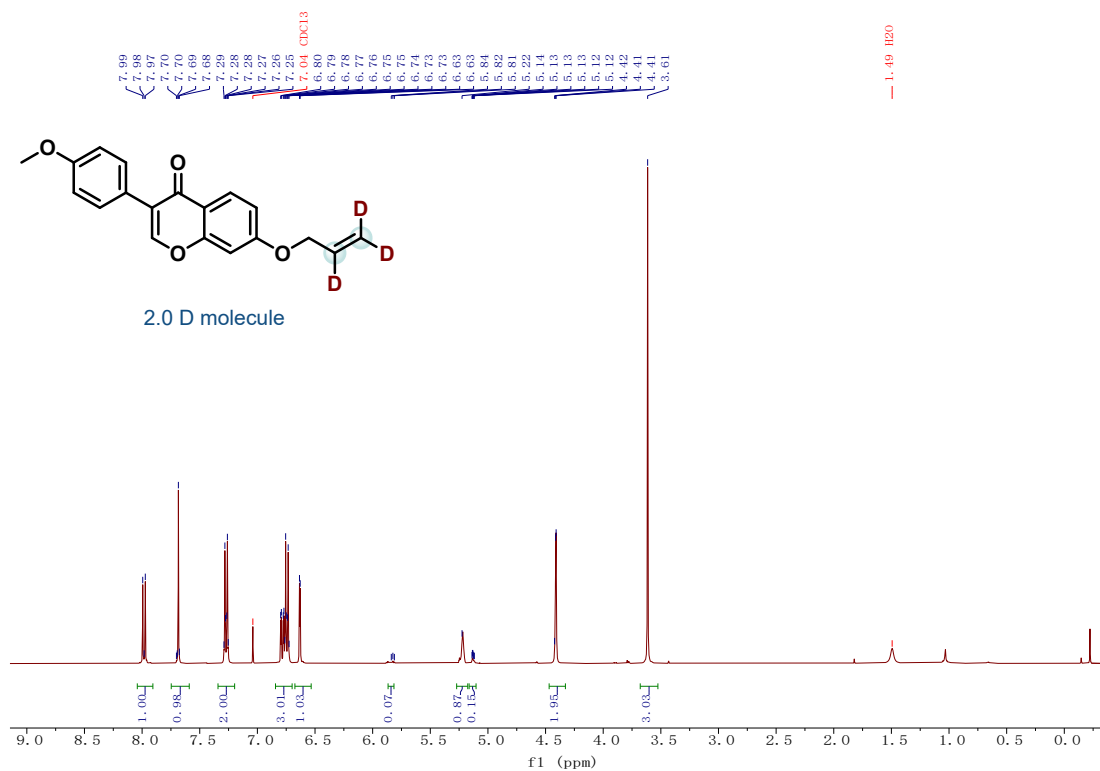

**<sup>13</sup>C NMR (101 MHz, CDCl<sub>3</sub>) spectrum of 2aa**

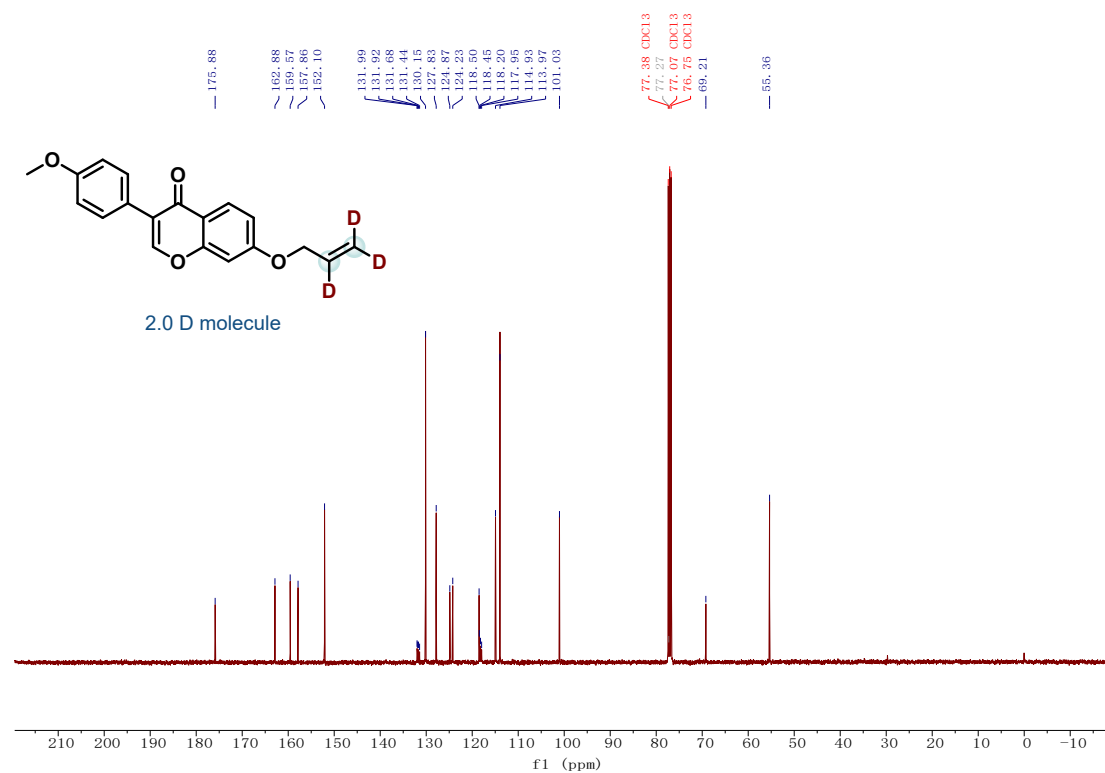

**<sup>1</sup>H NMR (400 MHz, CDCl<sub>3</sub>) spectrum of 2ab**

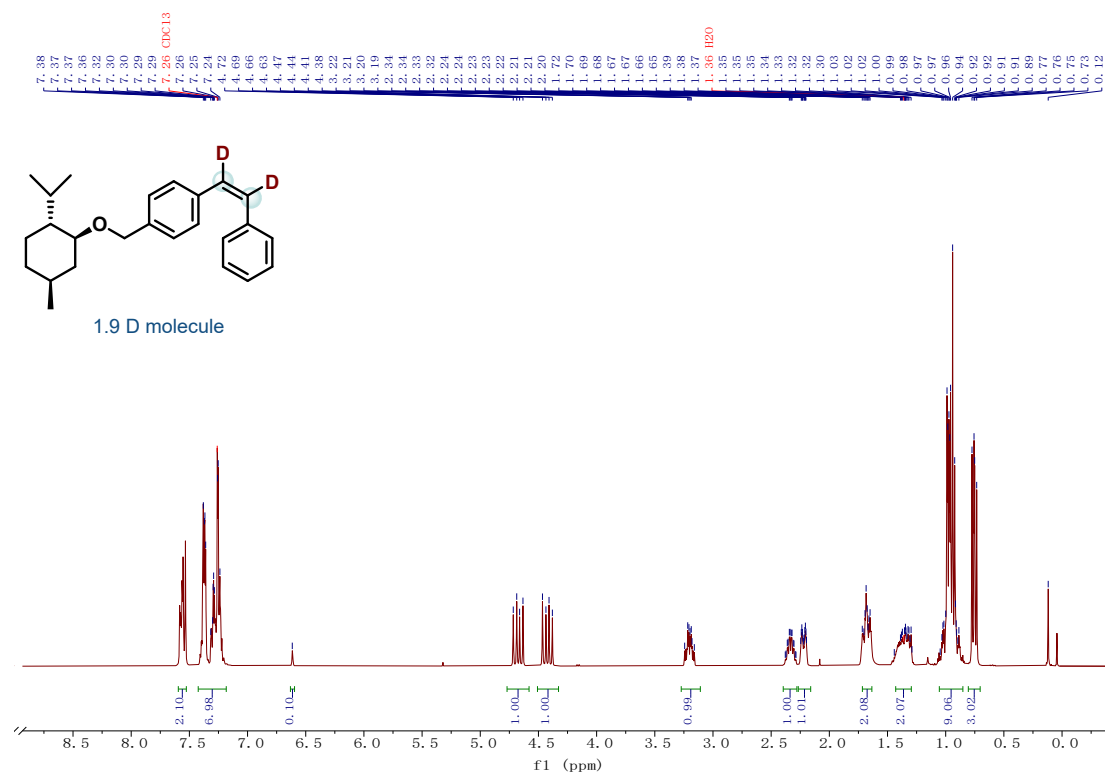



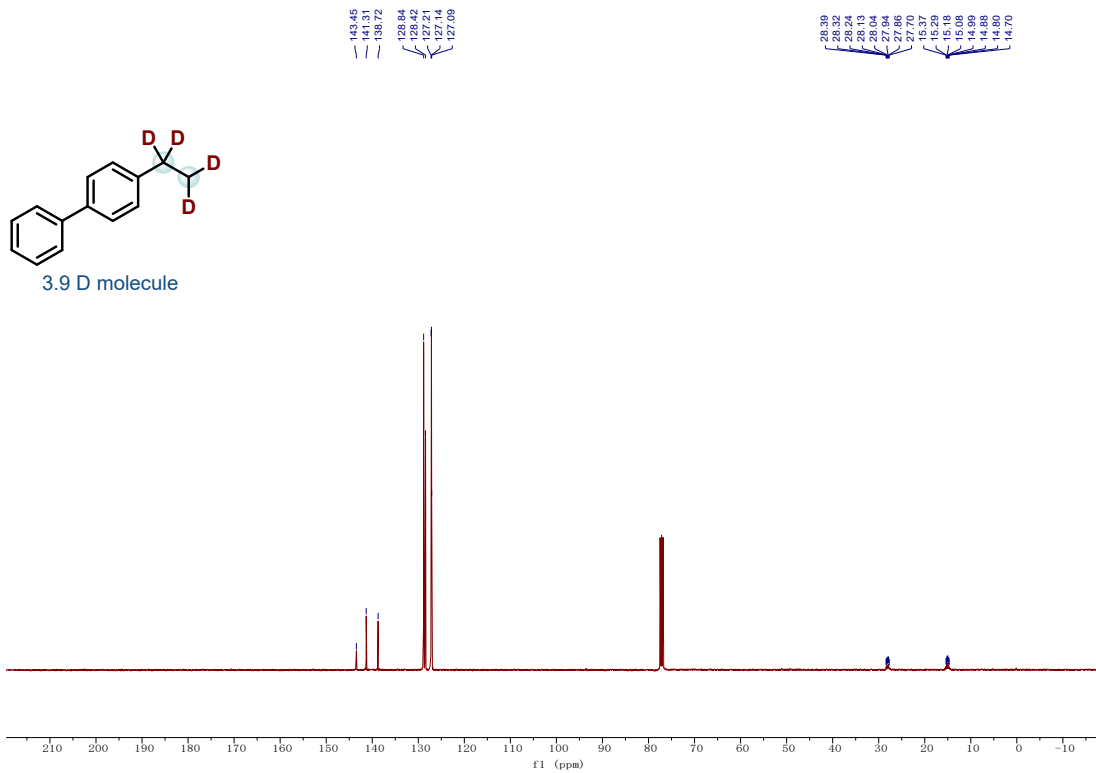

<sup>1</sup>H NMR (400 MHz, CDCl<sub>3</sub>) spectrum of 3b

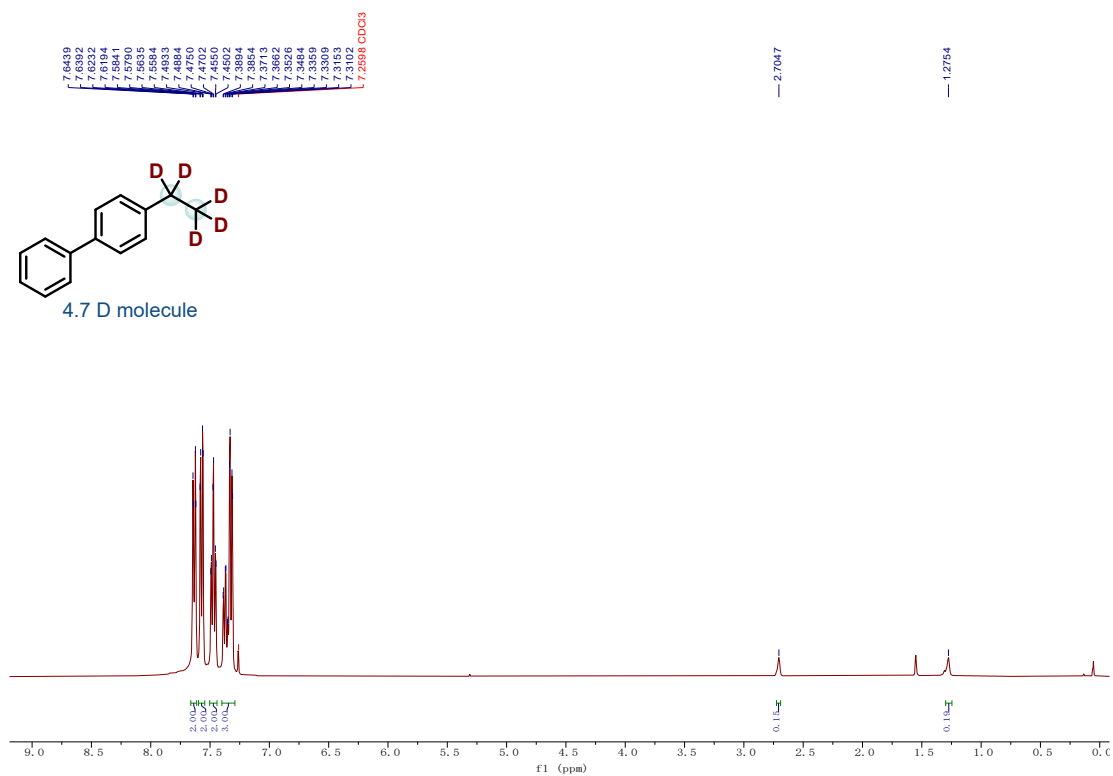



**<sup>13</sup>C NMR (101 MHz, CDCl<sub>3</sub>) spectrum of 3c**

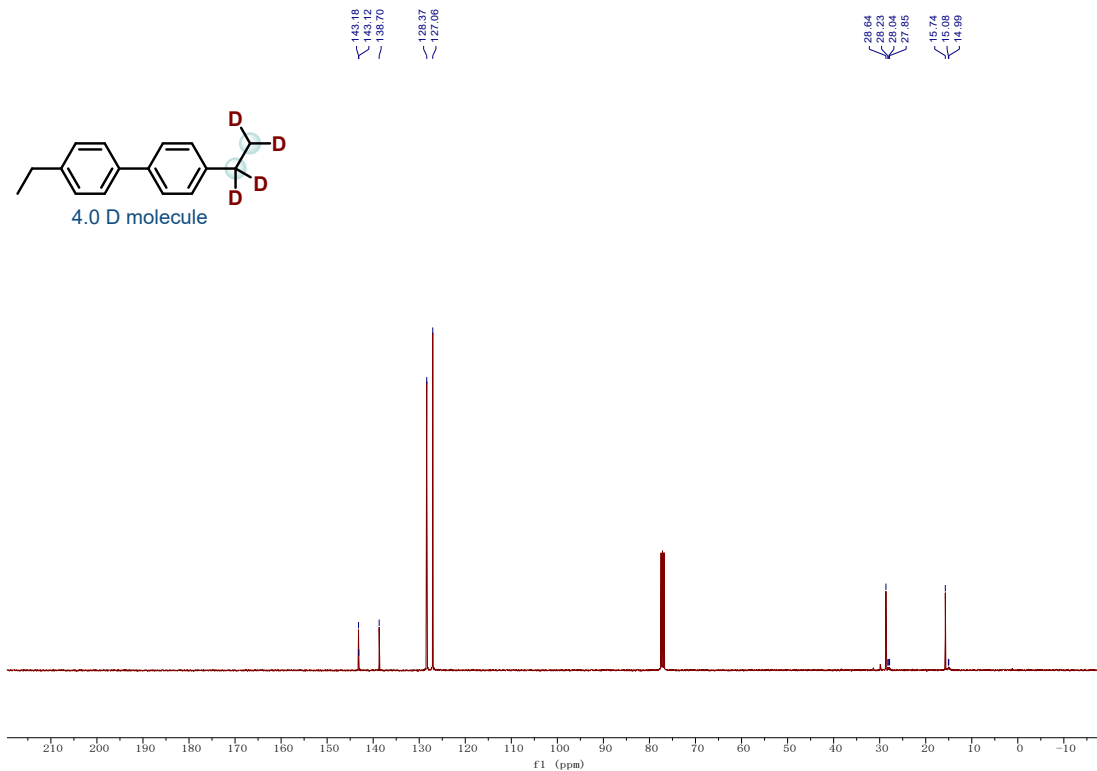

**<sup>1</sup>H NMR (400 MHz, CDCl<sub>3</sub>) spectrum of 3d**

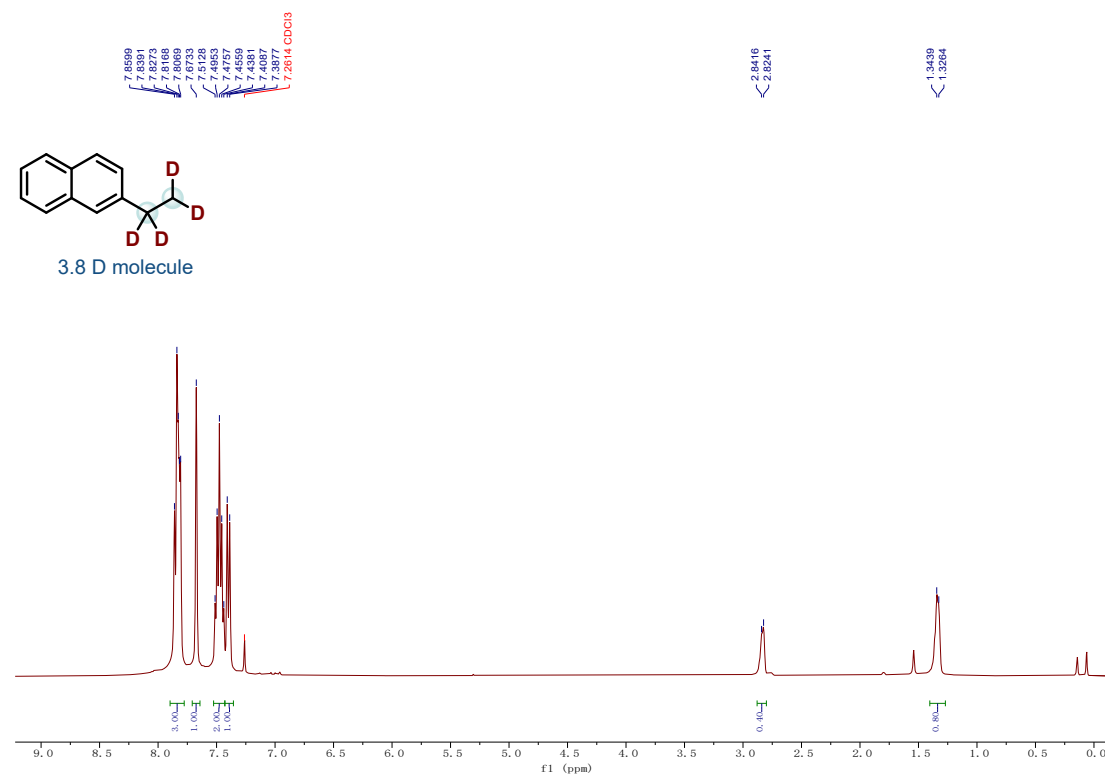

**$^{13}\text{C}$  NMR (101 MHz,  $\text{CDCl}_3$ ) spectrum of 3d**

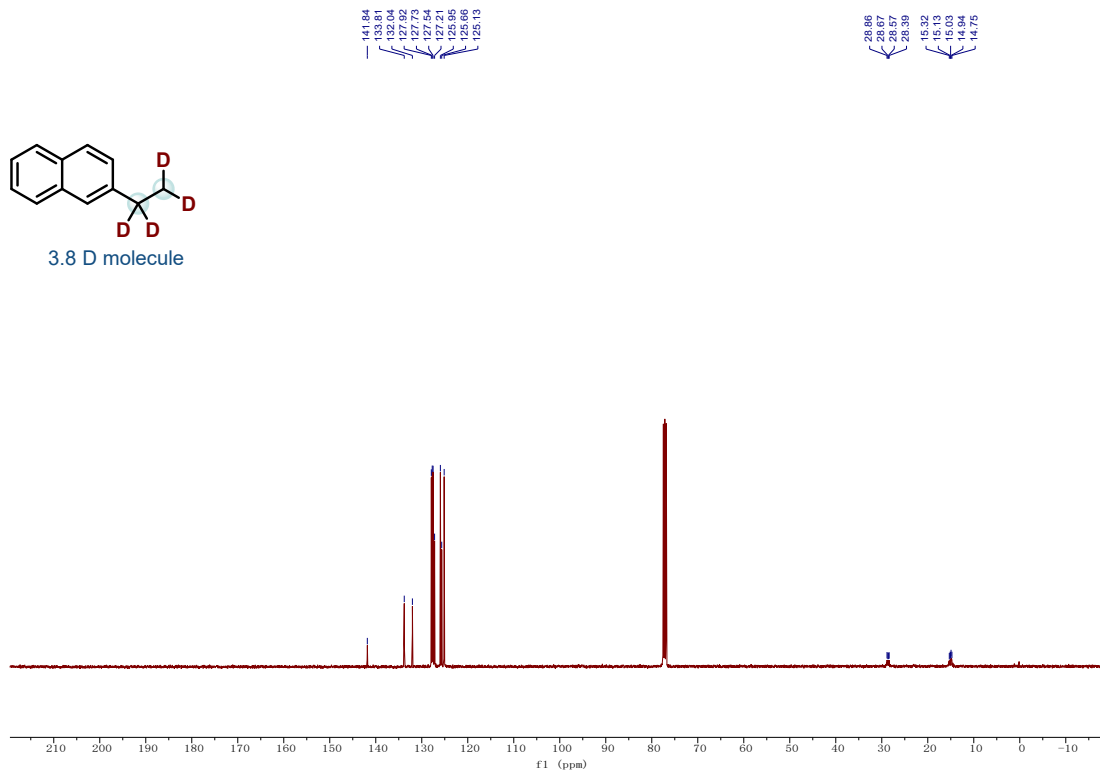

**$^1\text{H}$  NMR (400 MHz,  $\text{CDCl}_3$ ) spectrum of 3e**

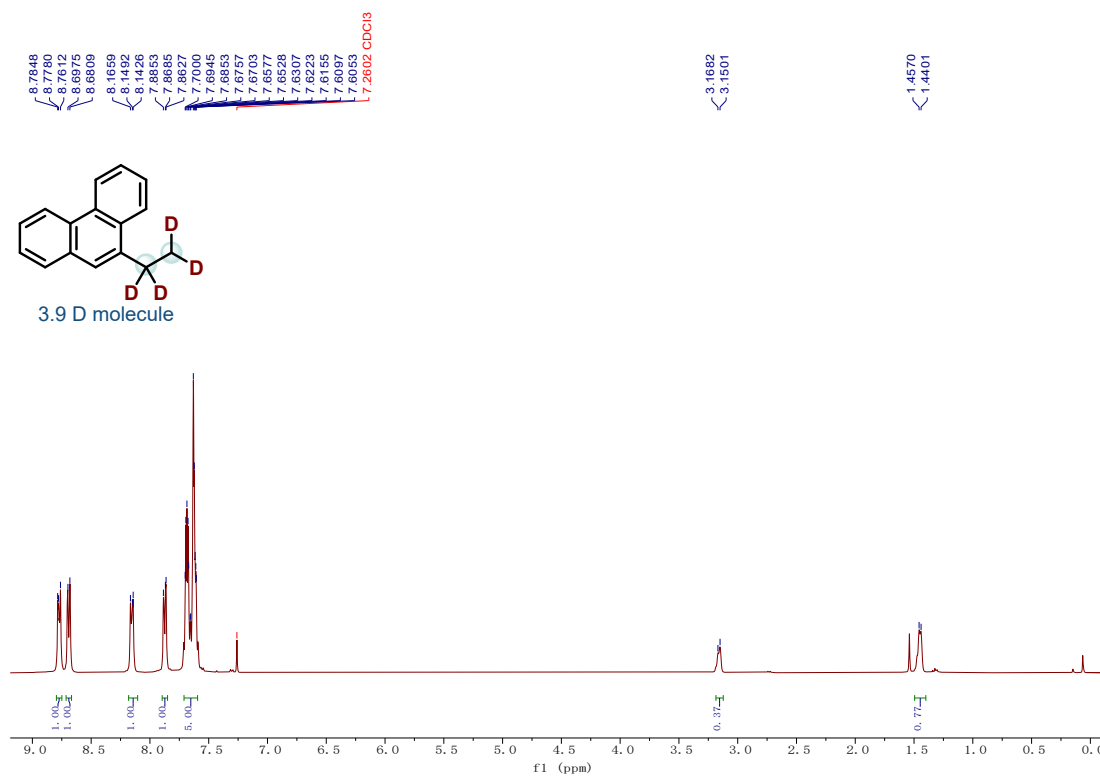

**<sup>13</sup>C NMR (101 MHz, CDCl<sub>3</sub>) spectrum of 3e**

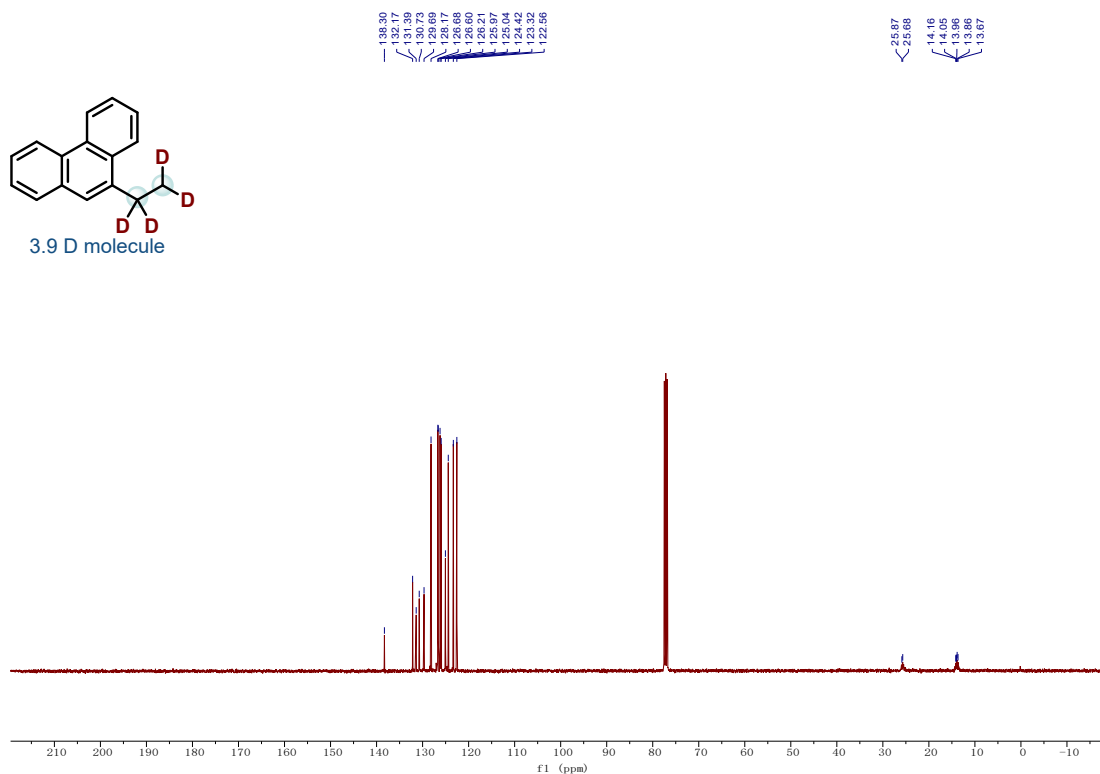

**<sup>1</sup>H NMR (400 MHz, CDCl<sub>3</sub>) spectrum of 3f**

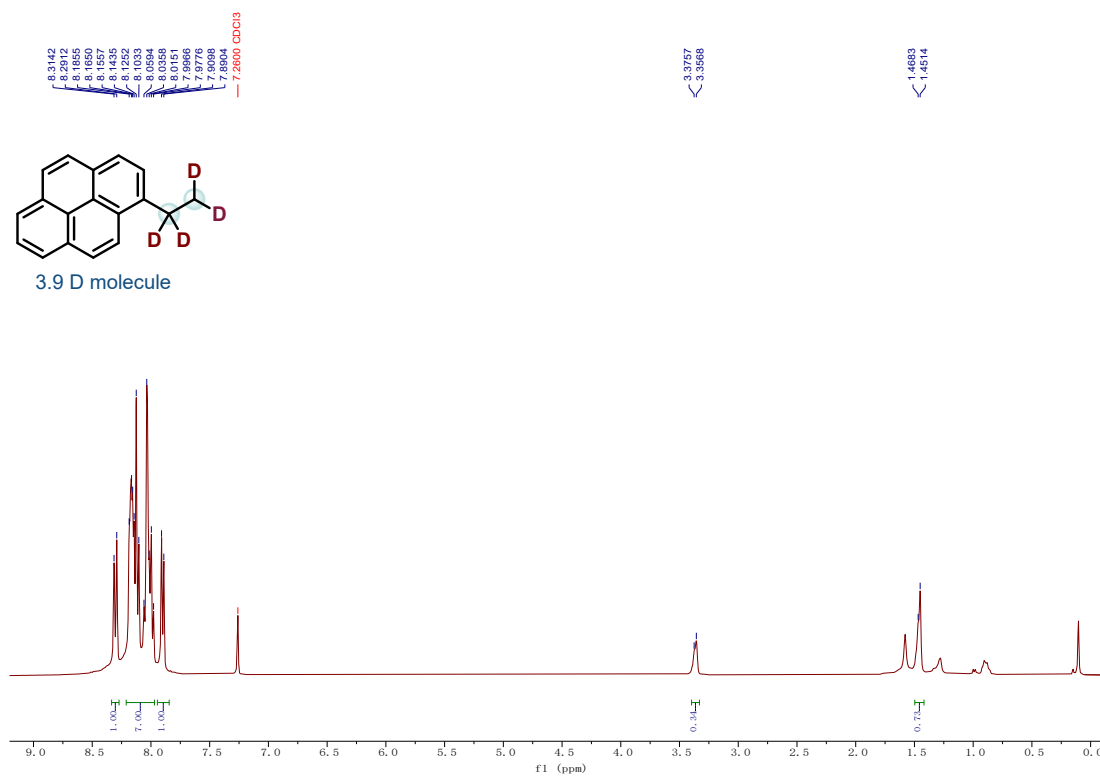

**<sup>13</sup>C NMR (101 MHz, CDCl<sub>3</sub>) spectrum of 3f**

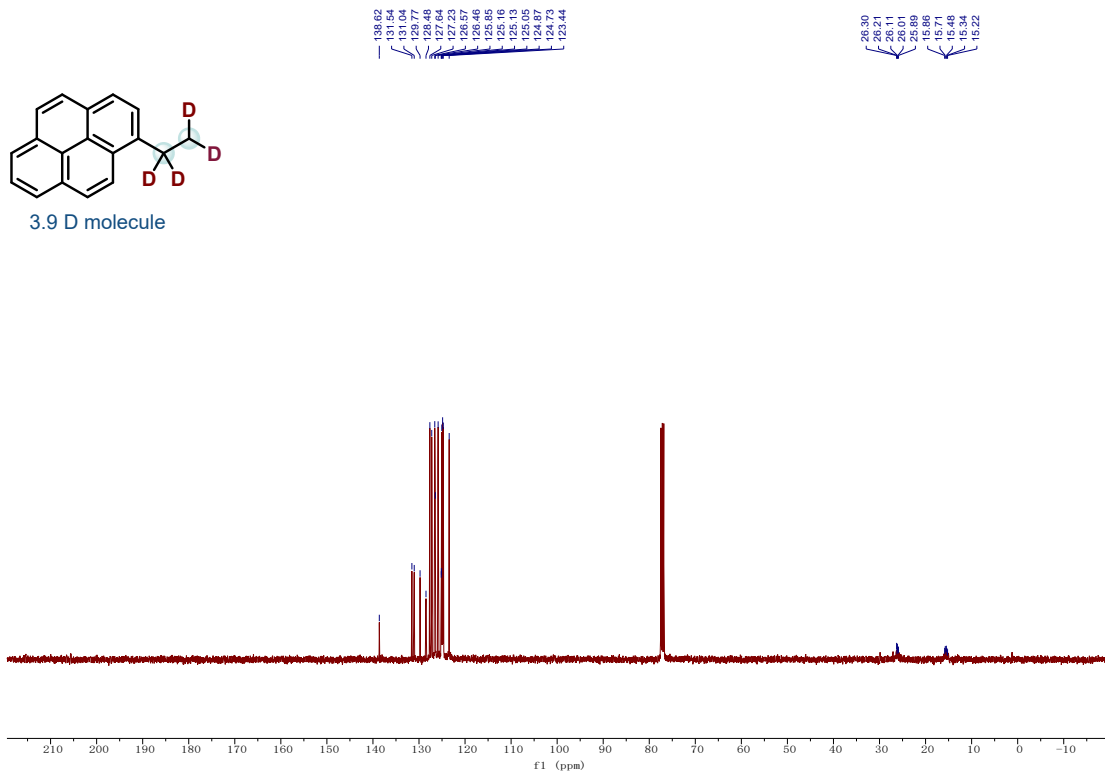

**<sup>1</sup>H NMR (400 MHz, CDCl<sub>3</sub>) spectrum of 3g**

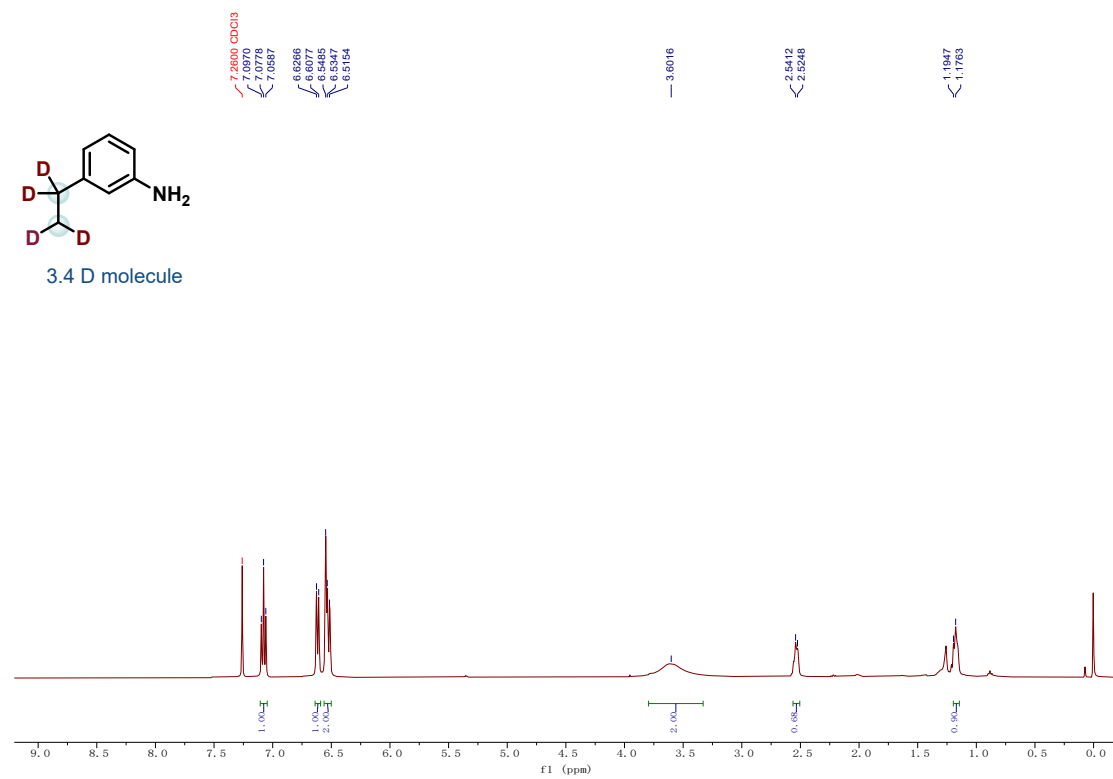

**<sup>13</sup>C NMR (101 MHz, CDCl<sub>3</sub>) spectrum of 3g**

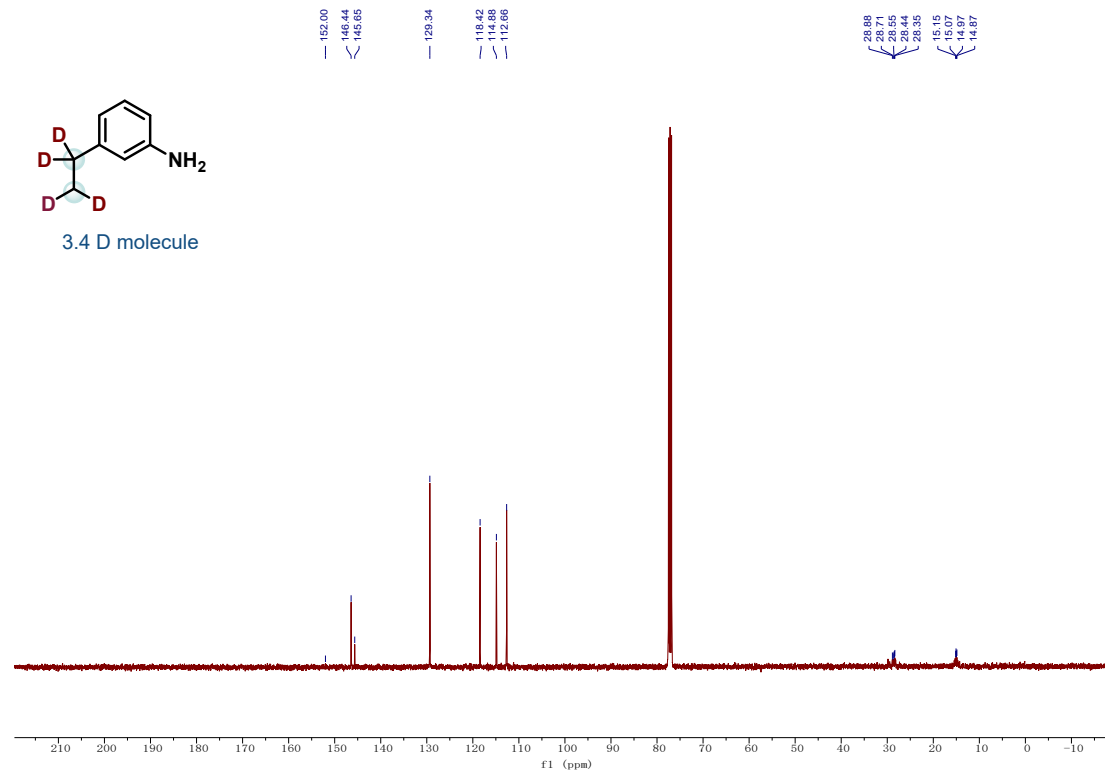

**<sup>1</sup>H NMR (400 MHz, CDCl<sub>3</sub>) spectrum of 3h**

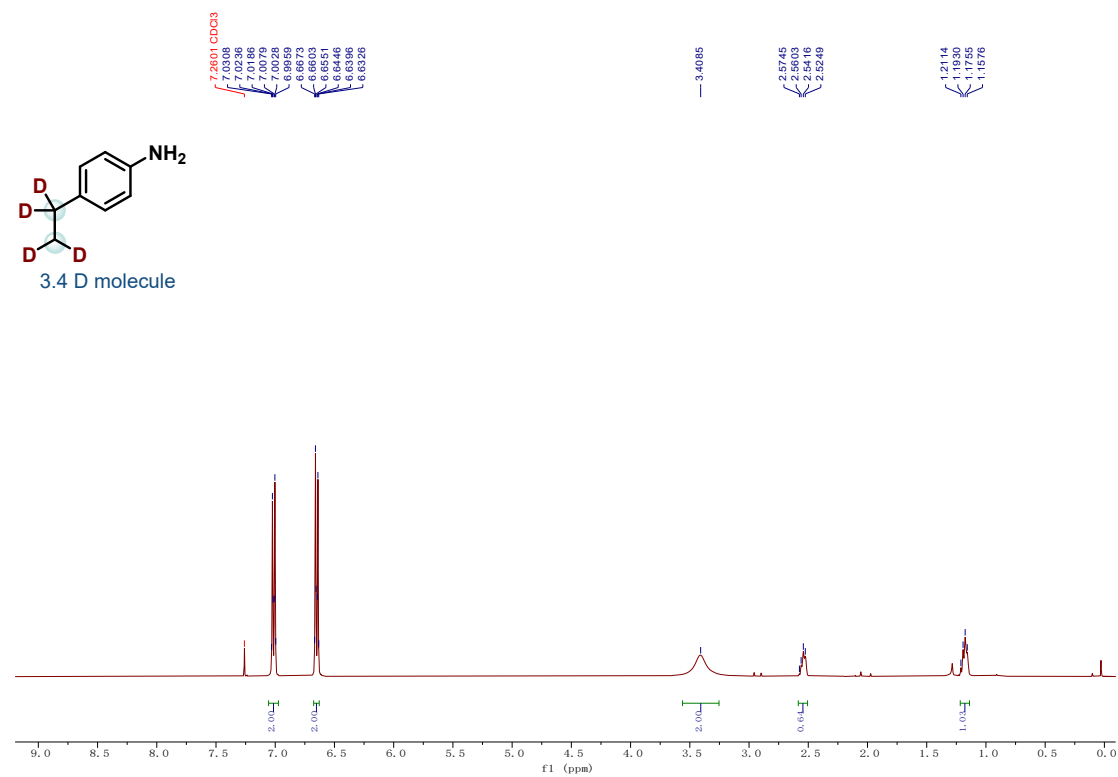

<sup>13</sup>C NMR (101 MHz, CDCl<sub>3</sub>) spectrum of 3h

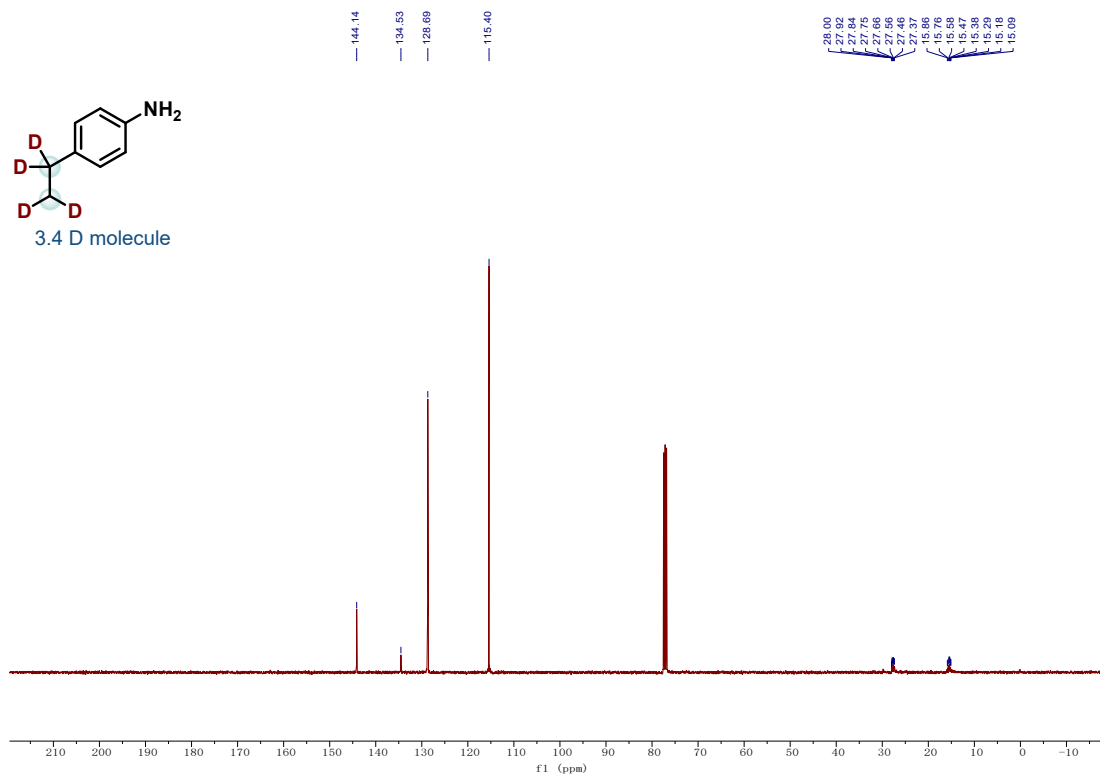

<sup>1</sup>H NMR (400 MHz, CDCl<sub>3</sub>) spectrum of 3i

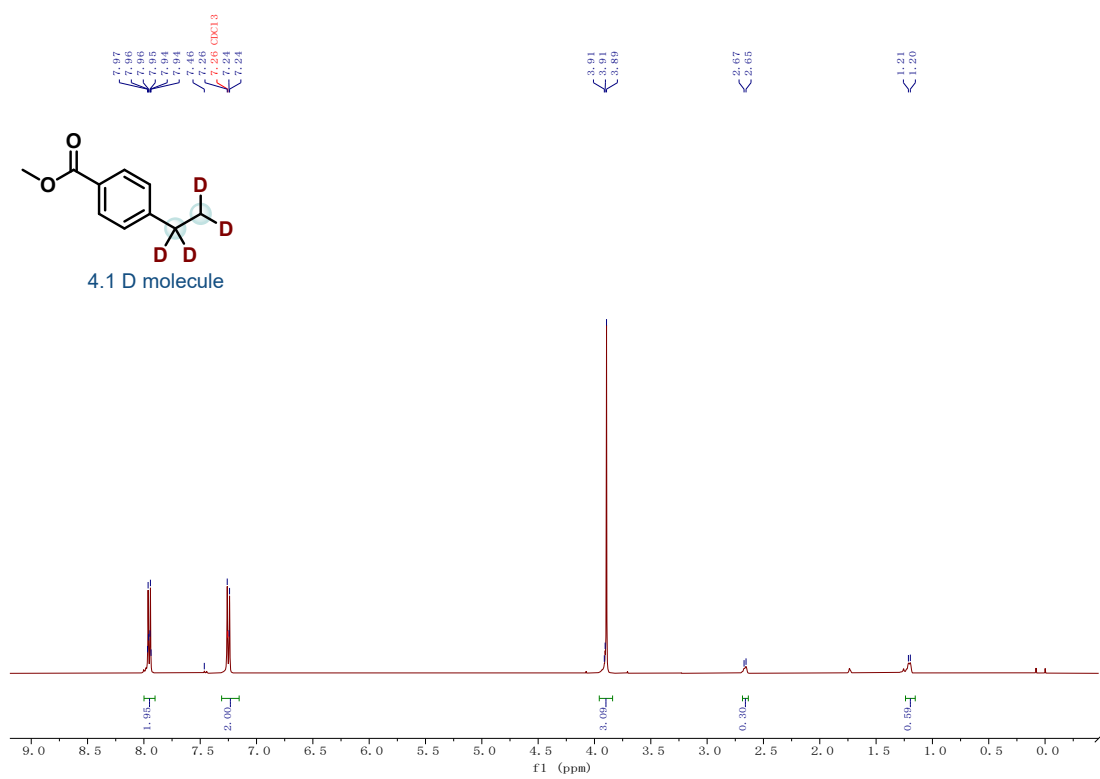

**<sup>13</sup>C NMR (101 MHz, CDCl<sub>3</sub>) spectrum of 3i**

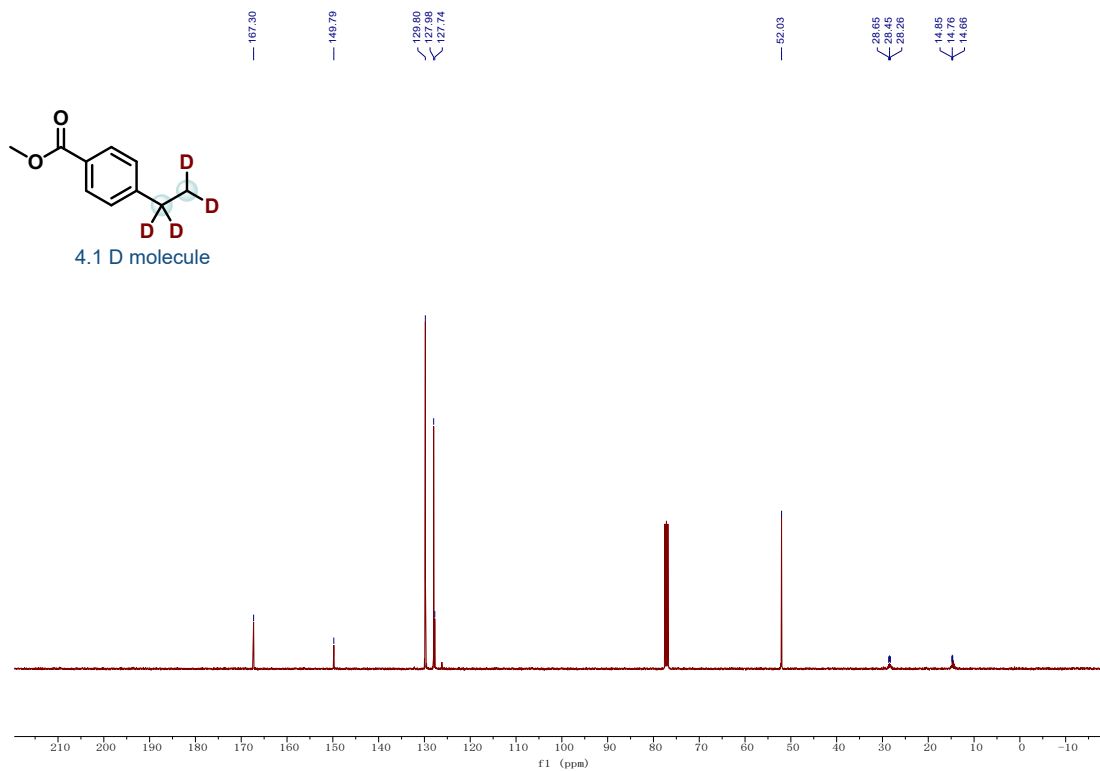

**<sup>1</sup>H NMR (400 MHz, CDCl<sub>3</sub>) spectrum of 3j**

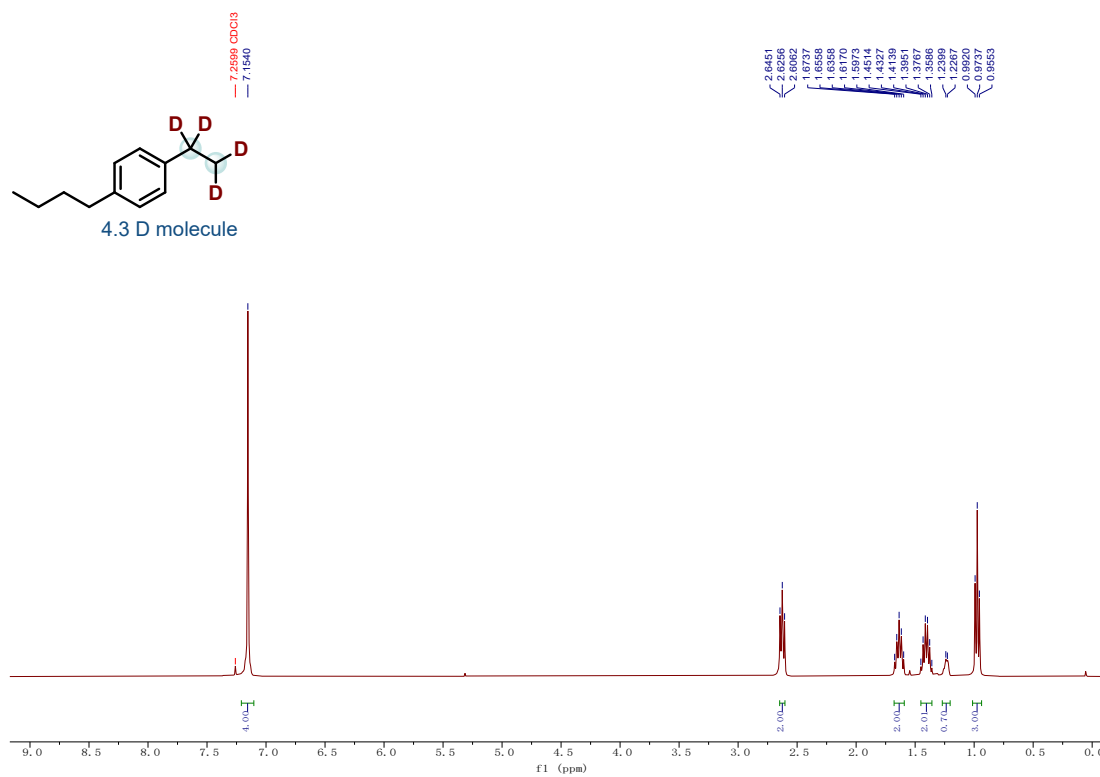



**<sup>13</sup>C NMR (101 MHz, CDCl<sub>3</sub>) spectrum of 3k**

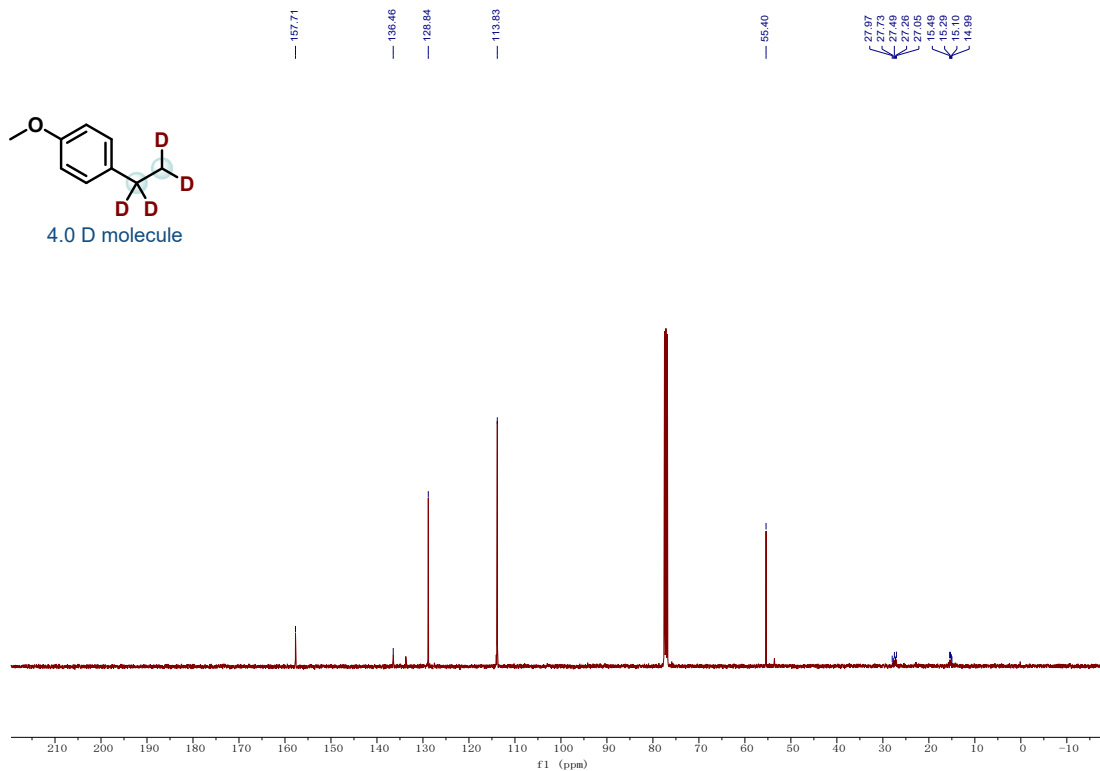

**<sup>1</sup>H NMR (400 MHz, CDCl<sub>3</sub>) spectrum of 3l**

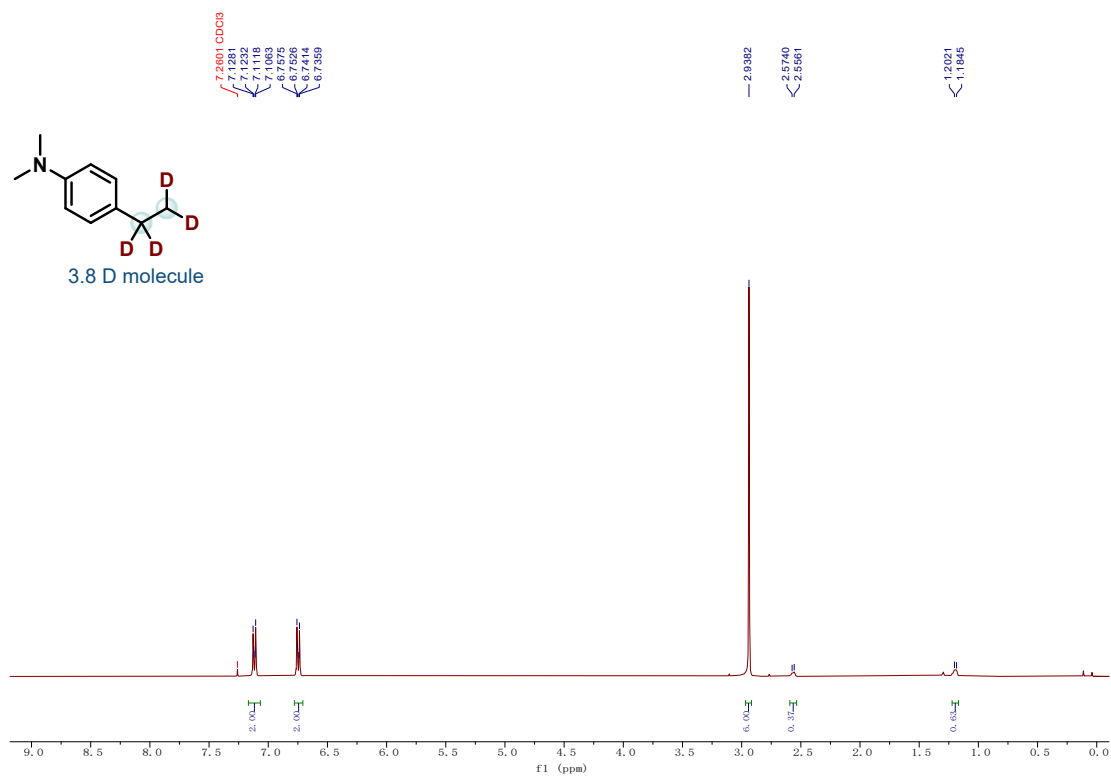

**<sup>13</sup>C NMR (101 MHz, CDCl<sub>3</sub>) spectrum of 3l**

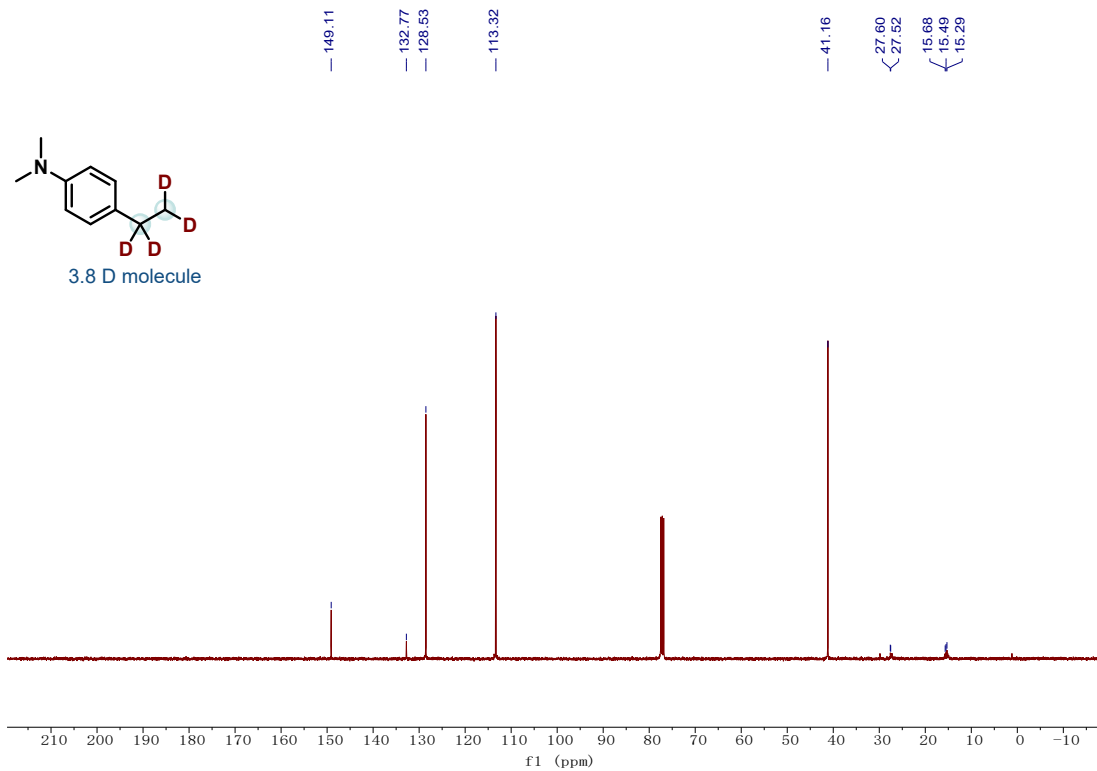

**<sup>1</sup>H NMR (400 MHz, CDCl<sub>3</sub>) spectrum of 3m**

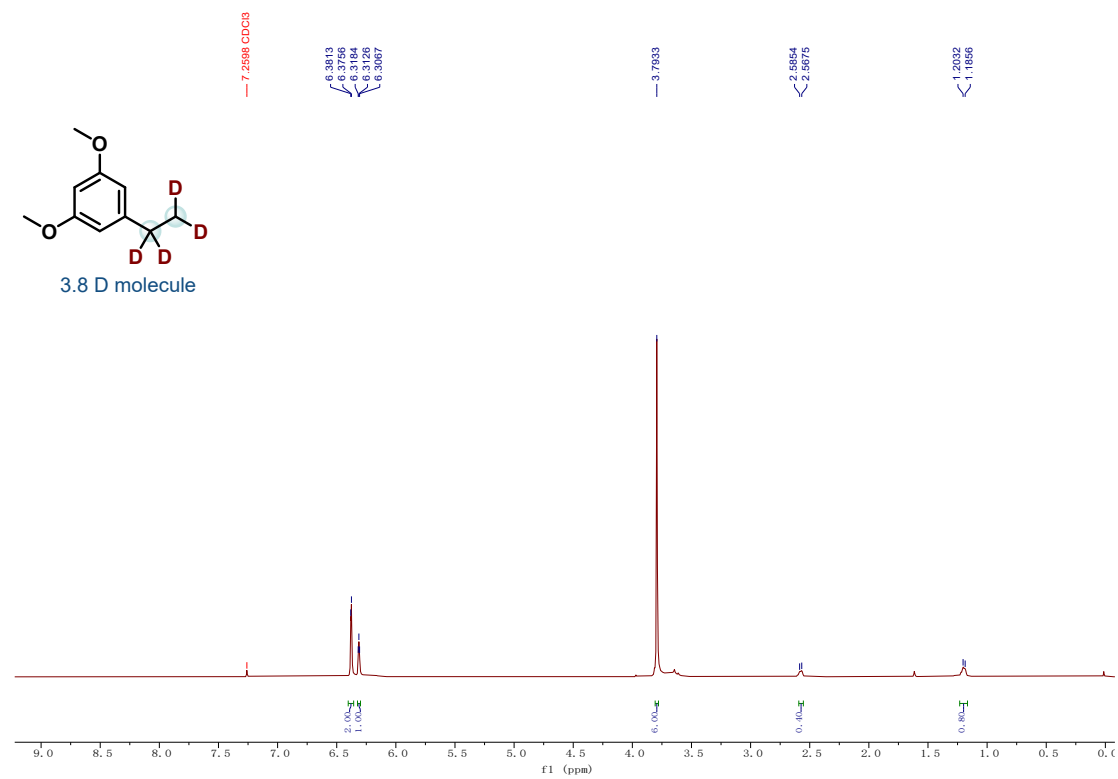

**<sup>13</sup>C NMR (101 MHz, CDCl<sub>3</sub>) spectrum of 3m**

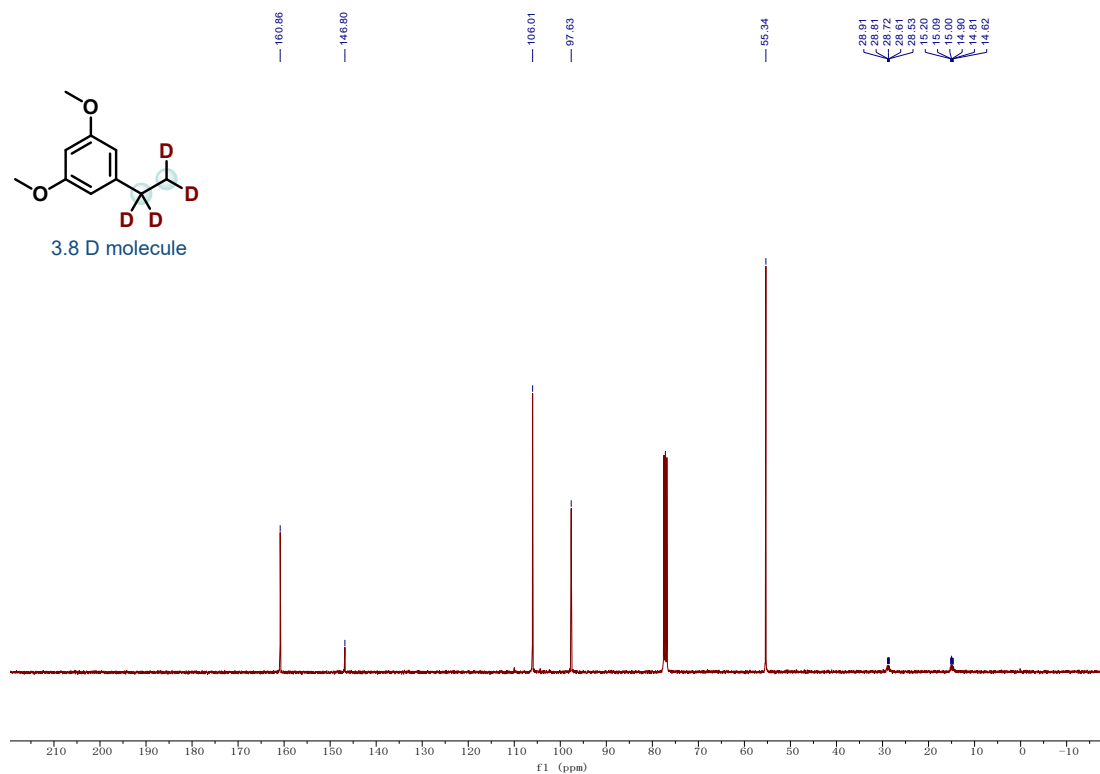

**<sup>1</sup>H NMR (400 MHz, CDCl<sub>3</sub>) spectrum of 3n**

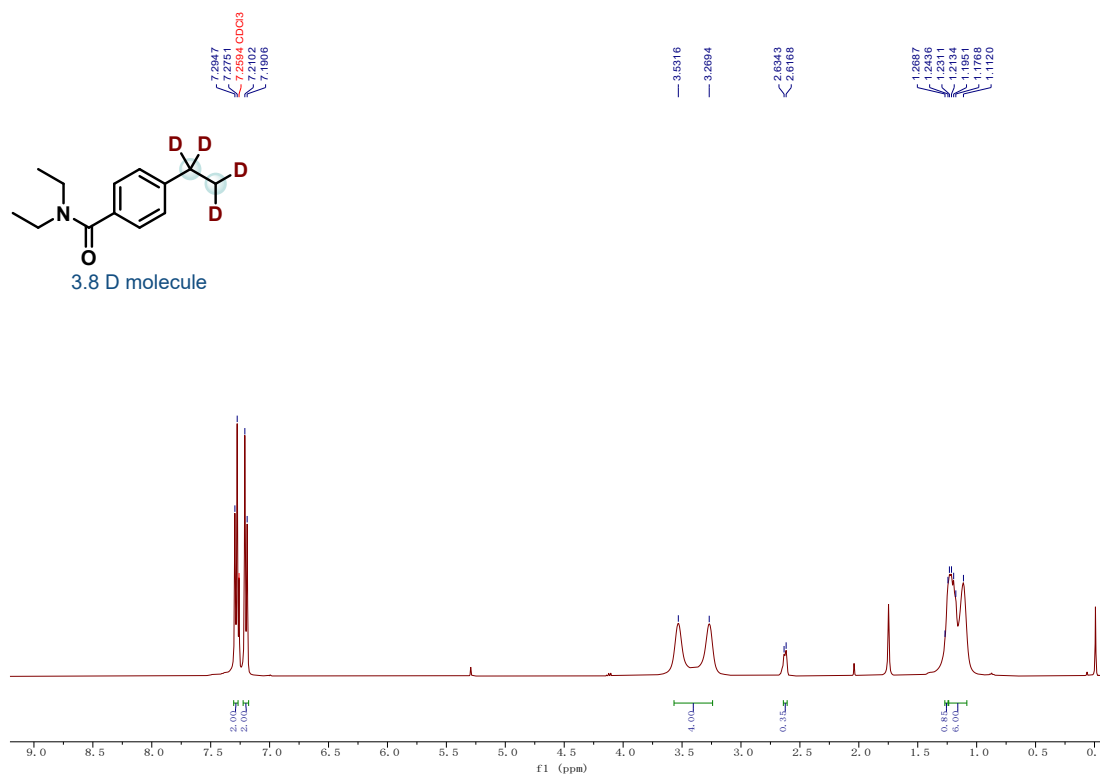

**<sup>13</sup>C NMR (101 MHz, CDCl<sub>3</sub>) spectrum of 3n**

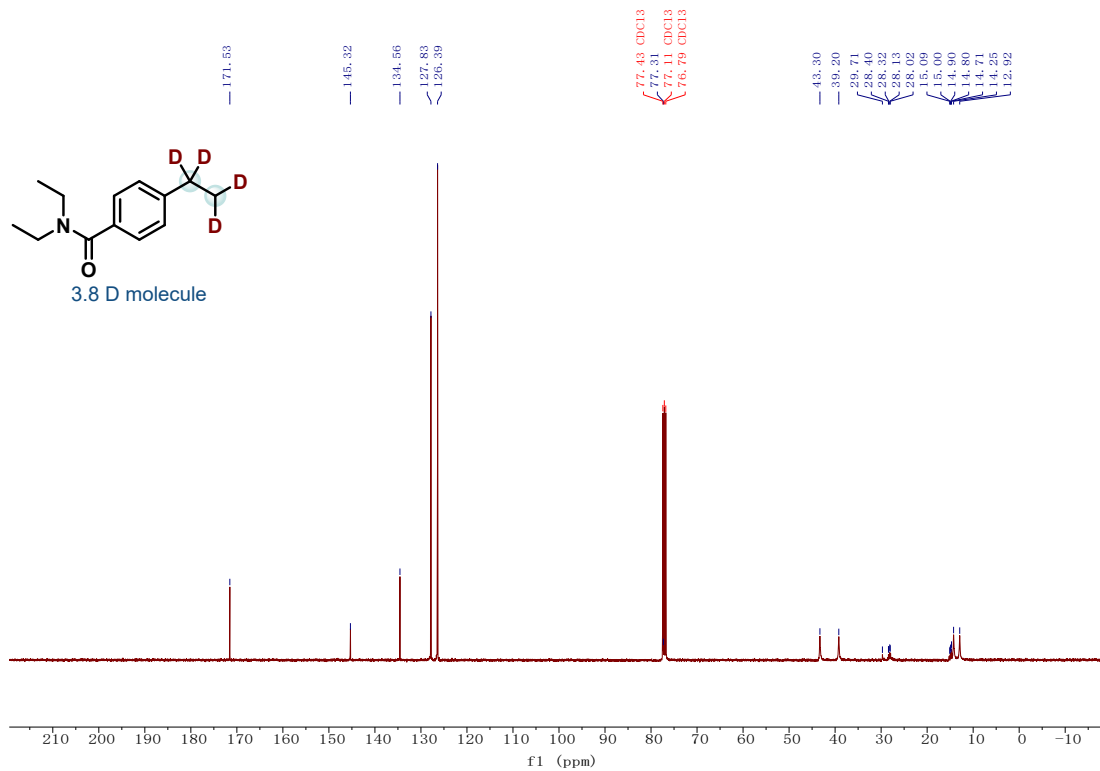

<sup>1</sup>H NMR (400 MHz, CDCl<sub>3</sub>) spectrum of 3o

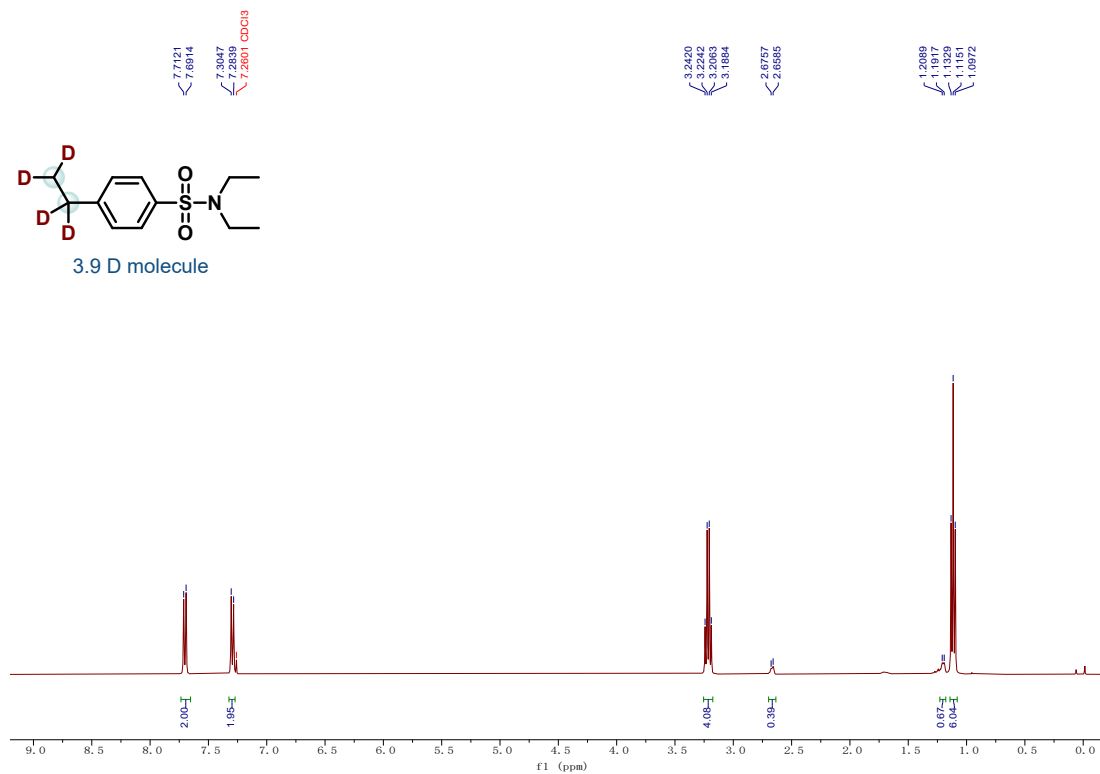

**<sup>13</sup>C NMR (101 MHz, CDCl<sub>3</sub>) spectrum of 3o**

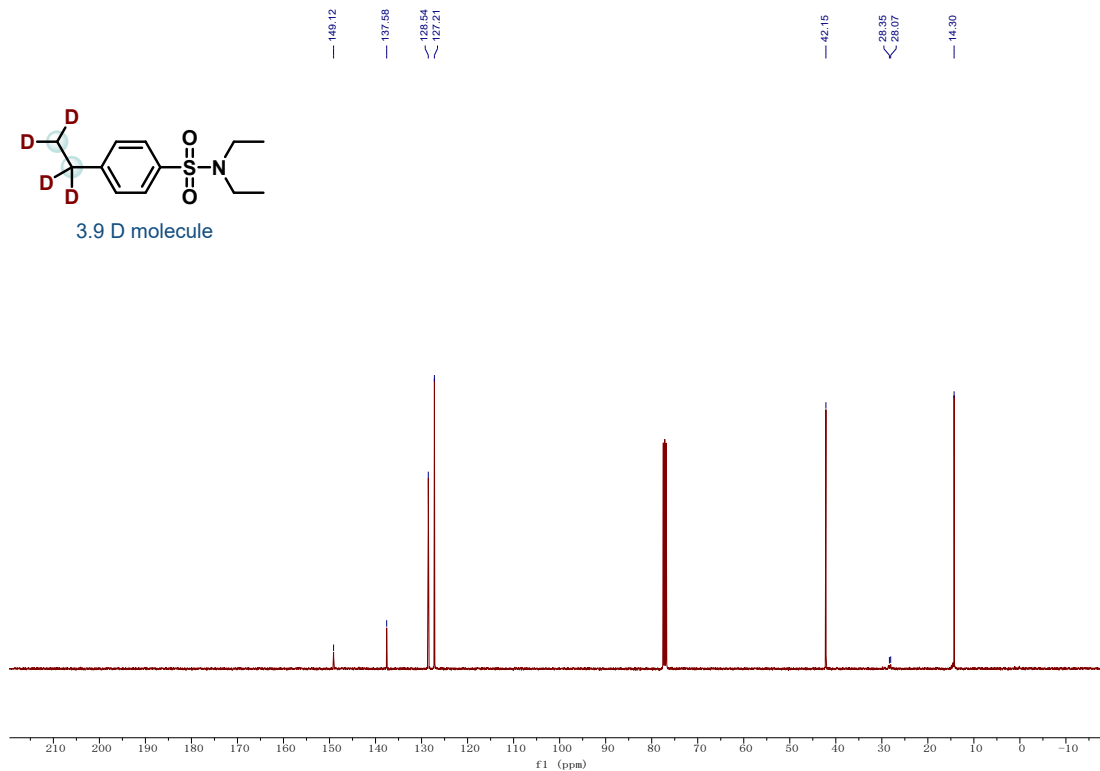

**<sup>1</sup>H NMR (400 MHz, CDCl<sub>3</sub>) spectrum of 3p**

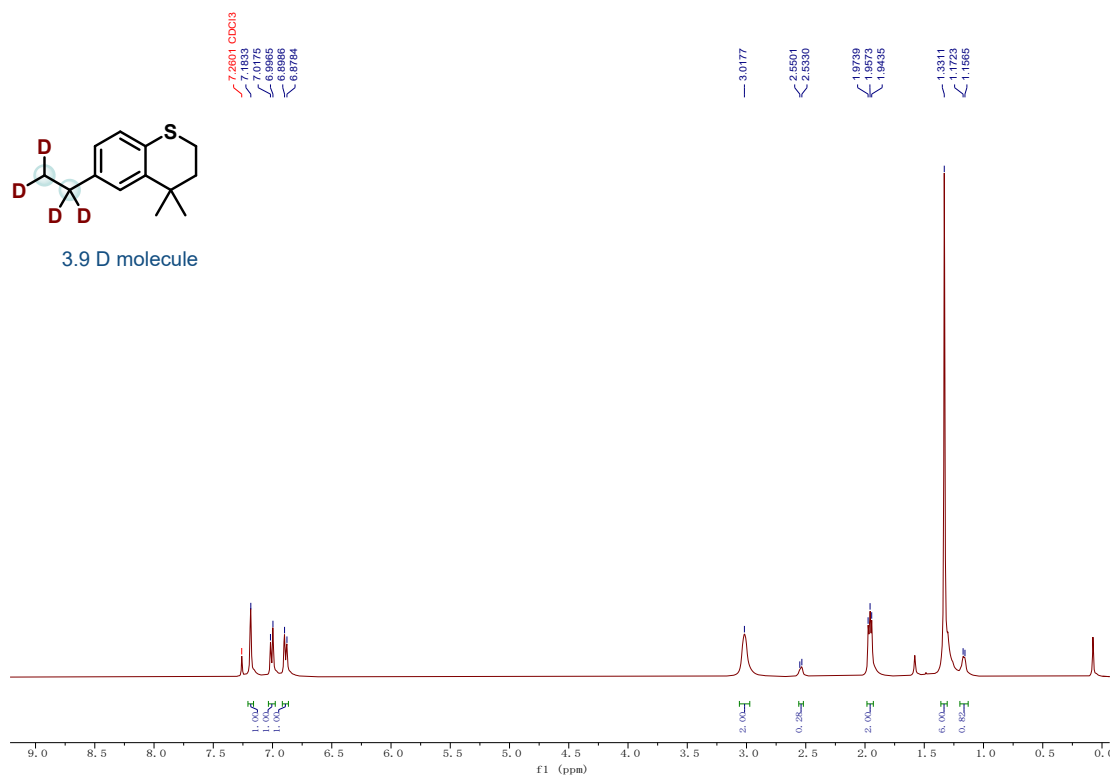

**<sup>13</sup>C NMR (101 MHz, CDCl<sub>3</sub>) spectrum of 3p**

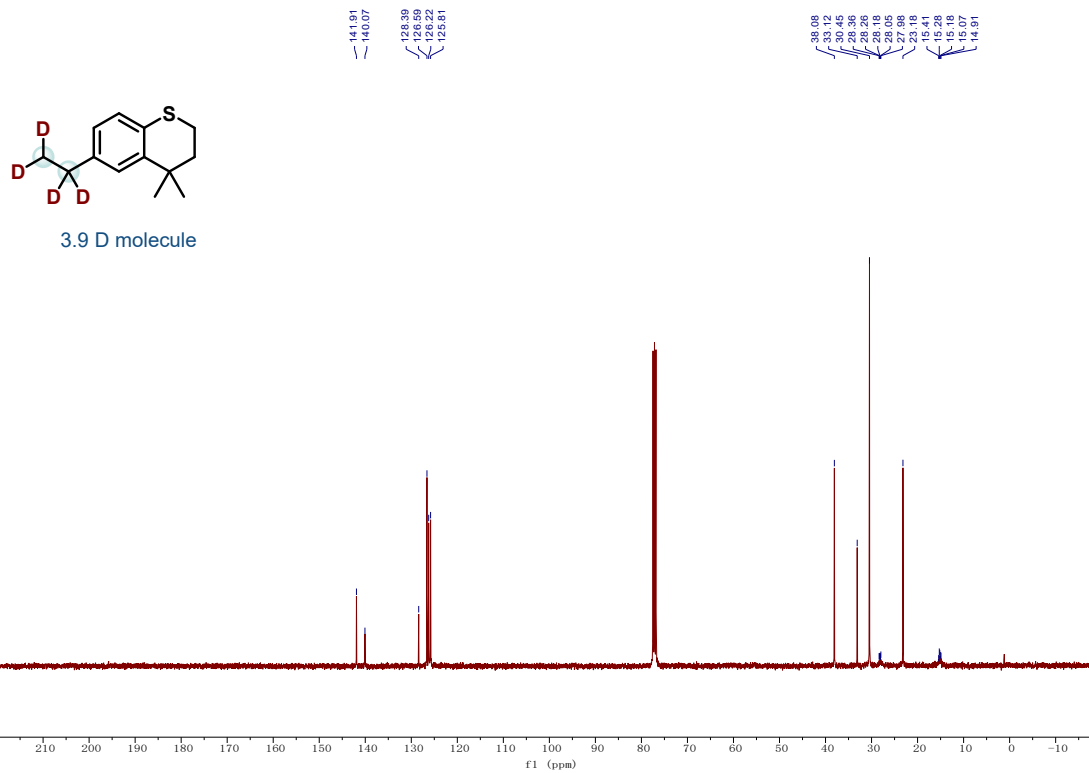

**<sup>1</sup>H NMR (400 MHz, CDCl<sub>3</sub>) spectrum of 3q**

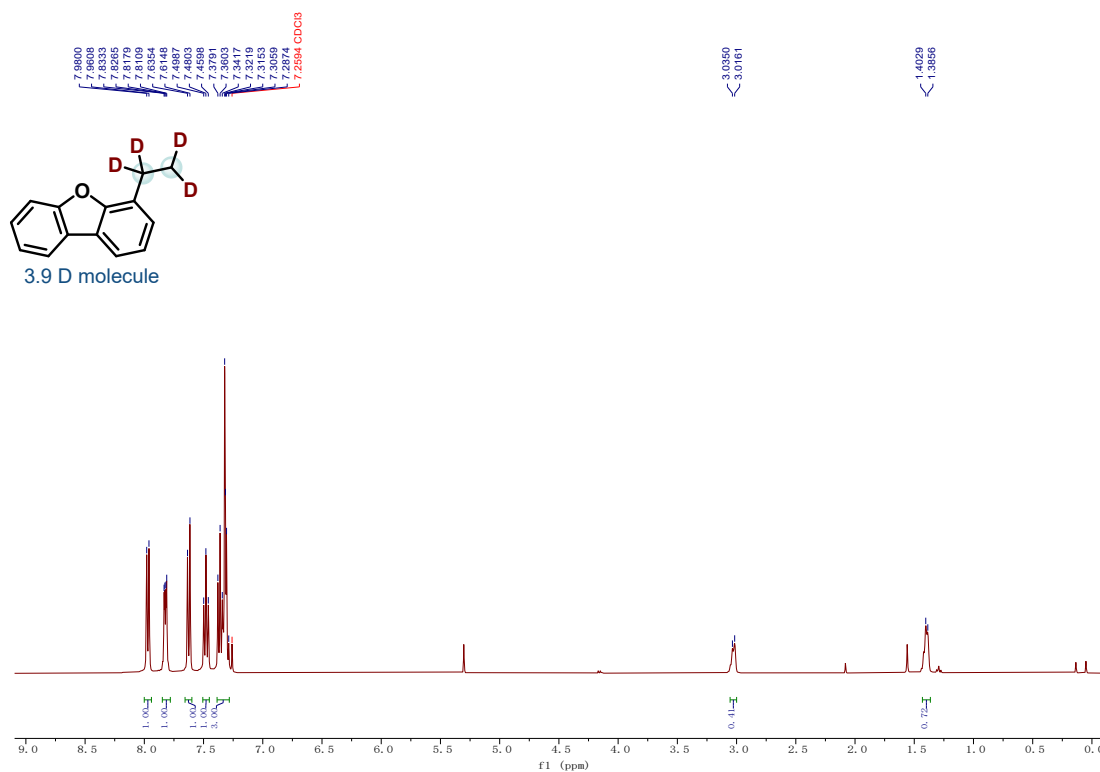

**<sup>13</sup>C NMR (101 MHz, CDCl<sub>3</sub>) spectrum of 3q**

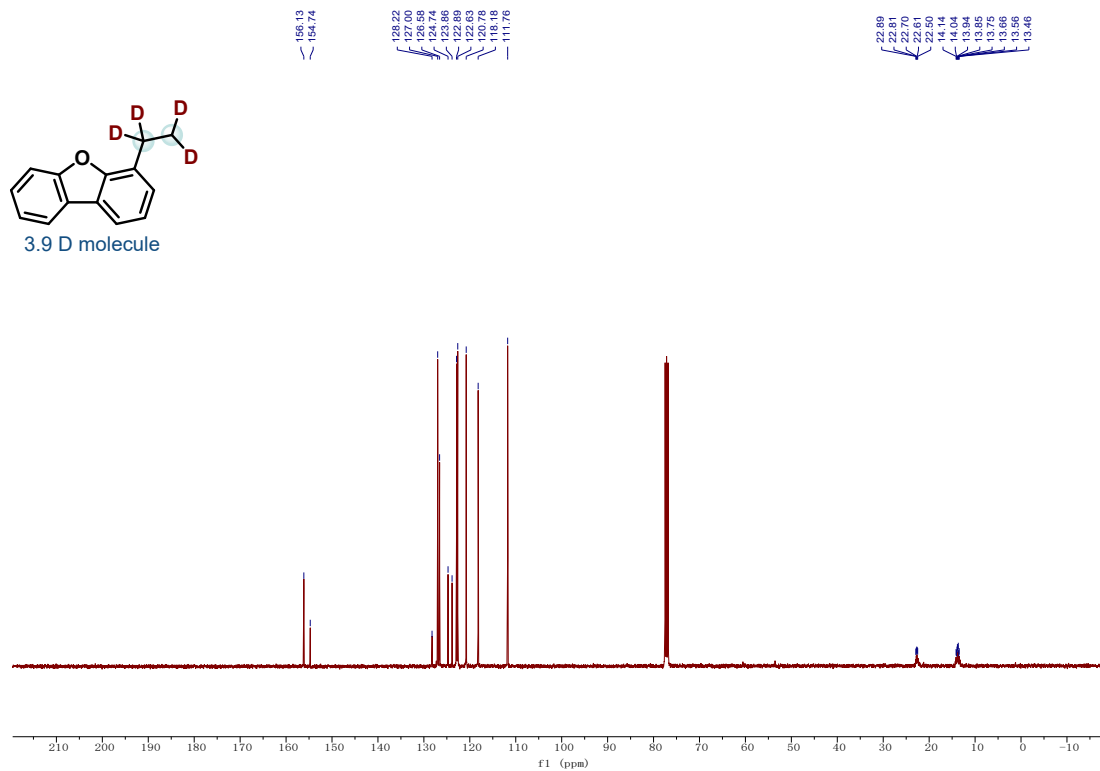

**<sup>1</sup>H NMR (400 MHz, CDCl<sub>3</sub>) spectrum of 3r**

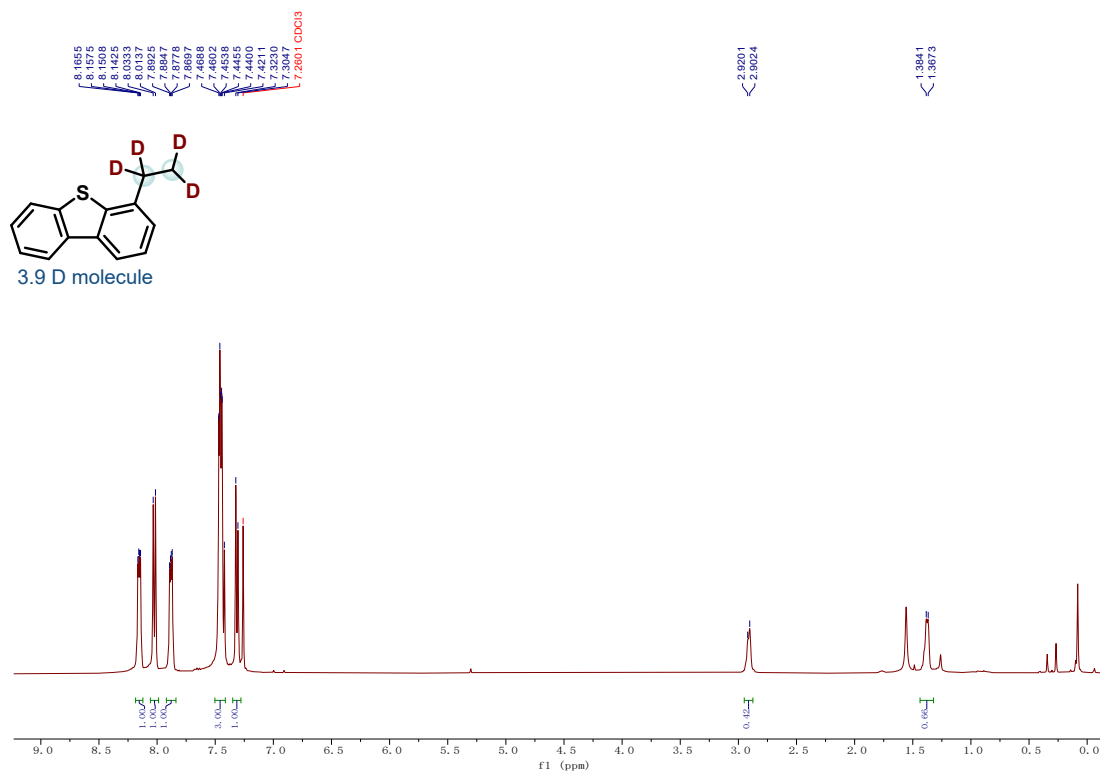

**<sup>13</sup>C NMR (101 MHz, CDCl<sub>3</sub>) spectrum of 3r**

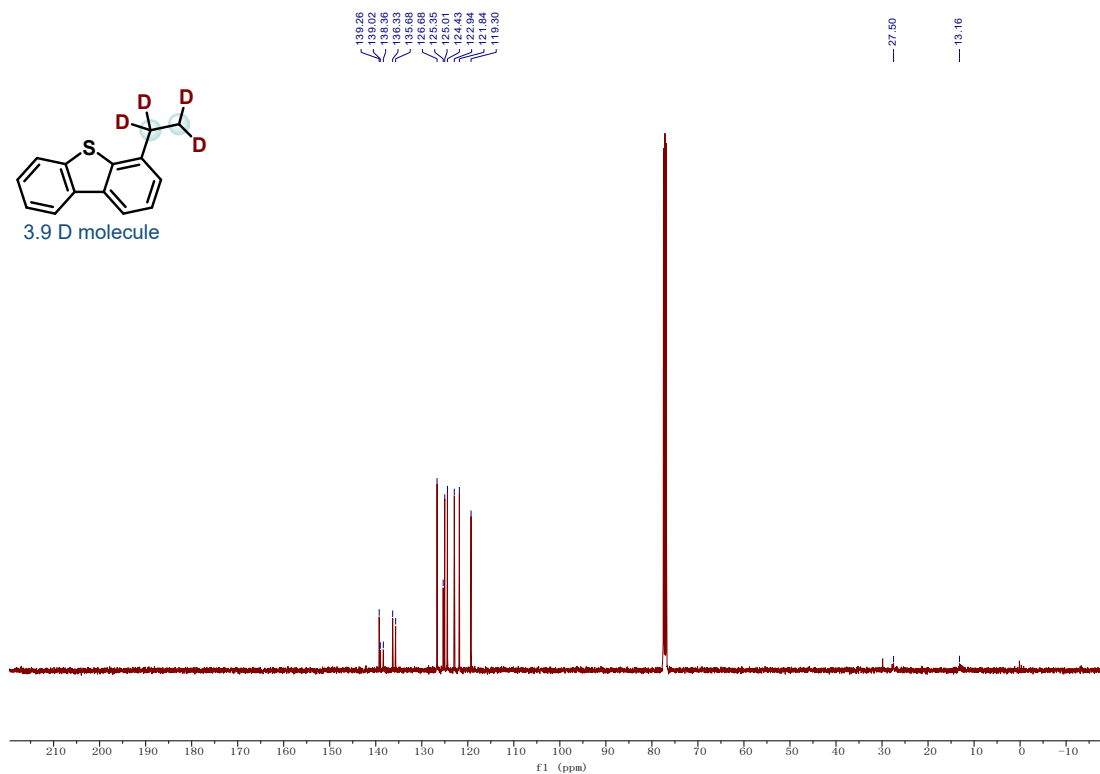

**<sup>1</sup>H NMR (400 MHz, CDCl<sub>3</sub>) spectrum of 3s**

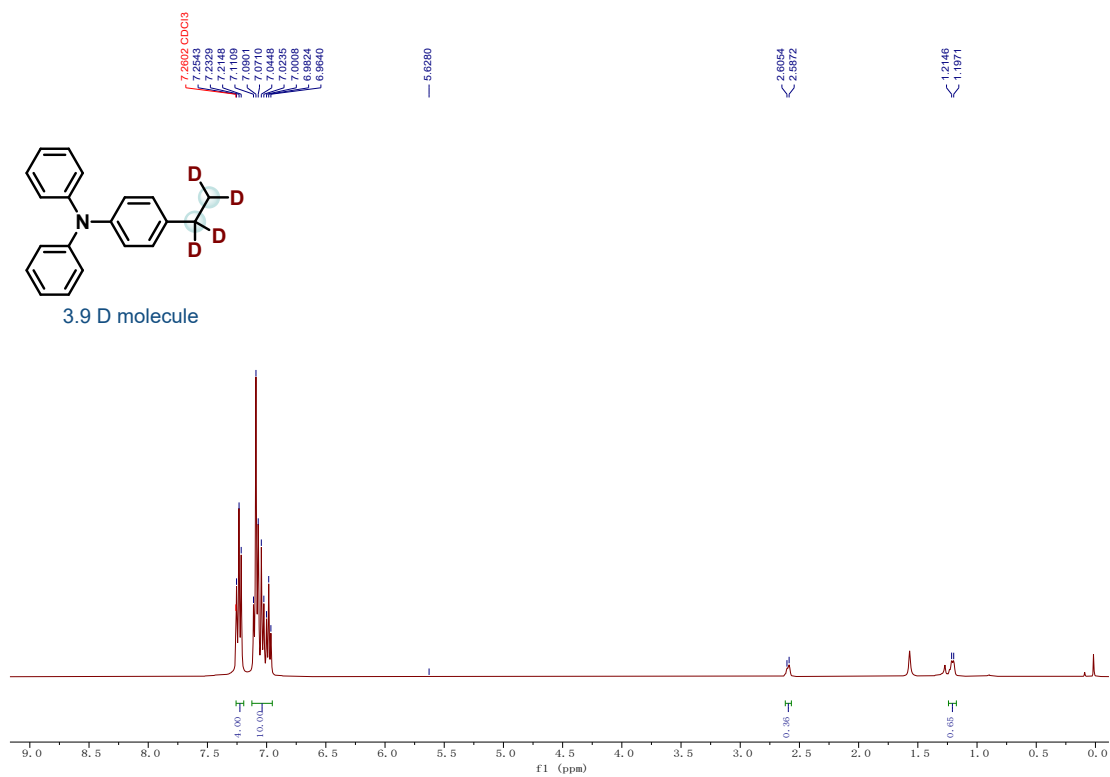

**<sup>13</sup>C NMR (101 MHz, CDCl<sub>3</sub>) spectrum of 3s**

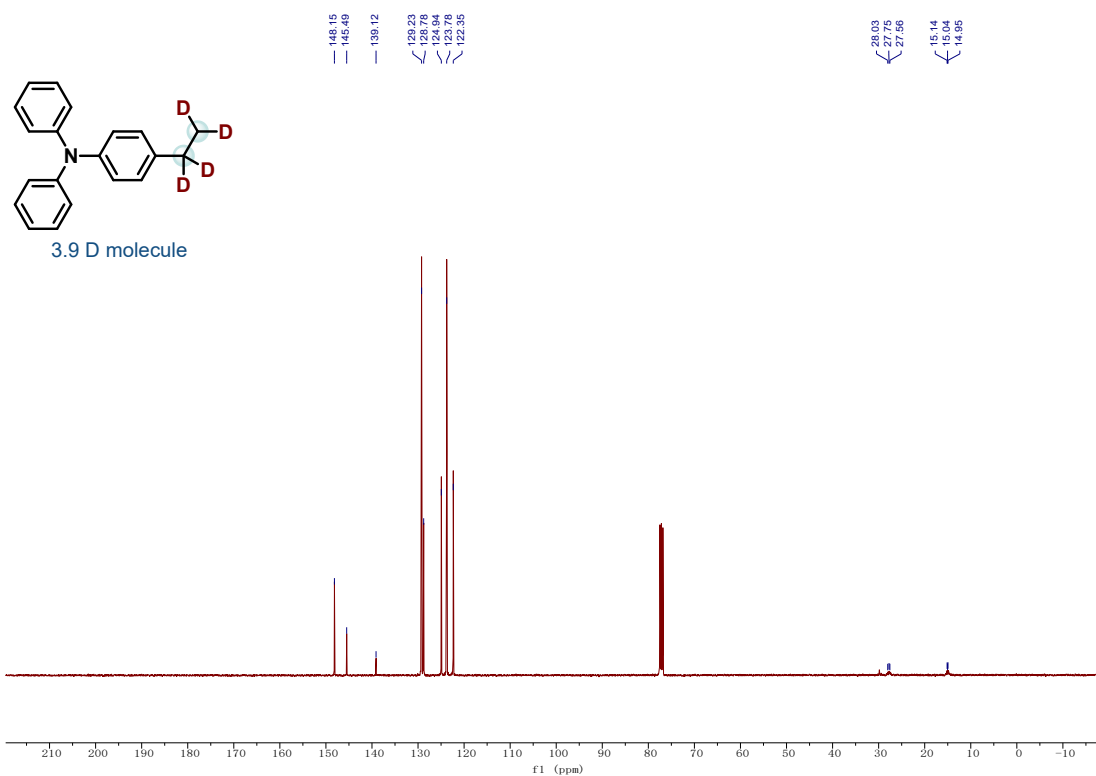

**<sup>13</sup>C NMR (101 MHz, CDCl<sub>3</sub>) spectrum of 3t**

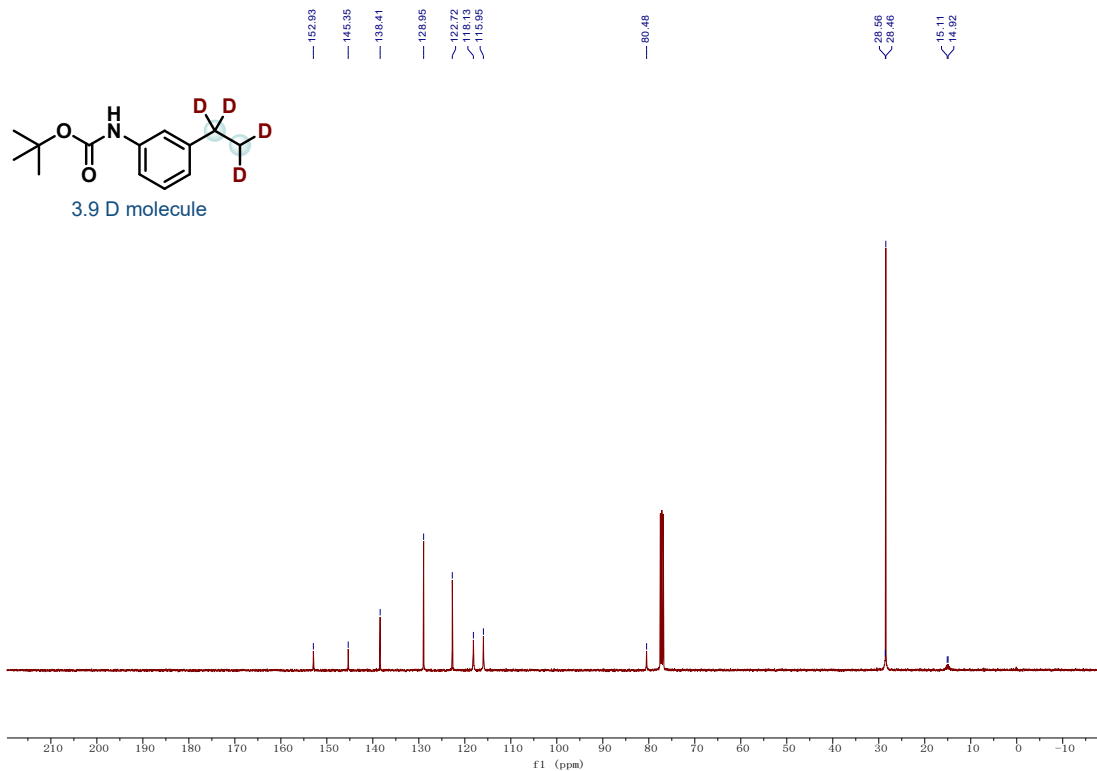

**<sup>1</sup>H NMR (400 MHz, CDCl<sub>3</sub>) spectrum of 3u**

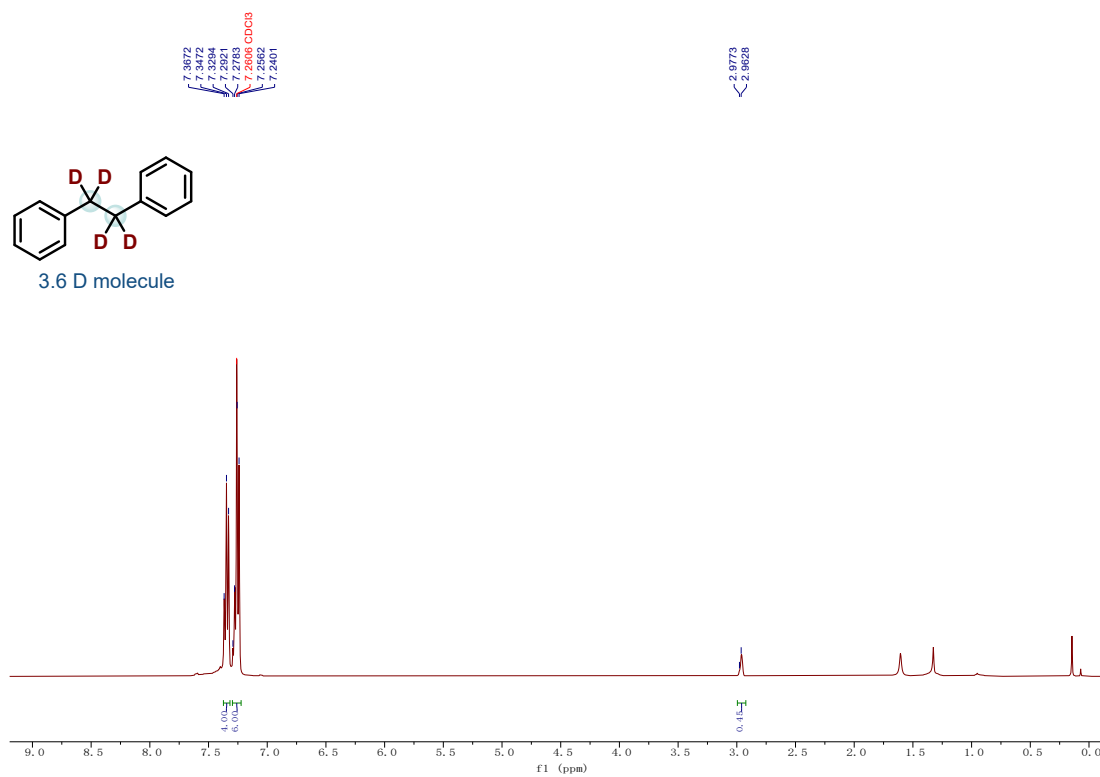

**<sup>13</sup>C NMR (101 MHz, CDCl<sub>3</sub>) spectrum of 3u**

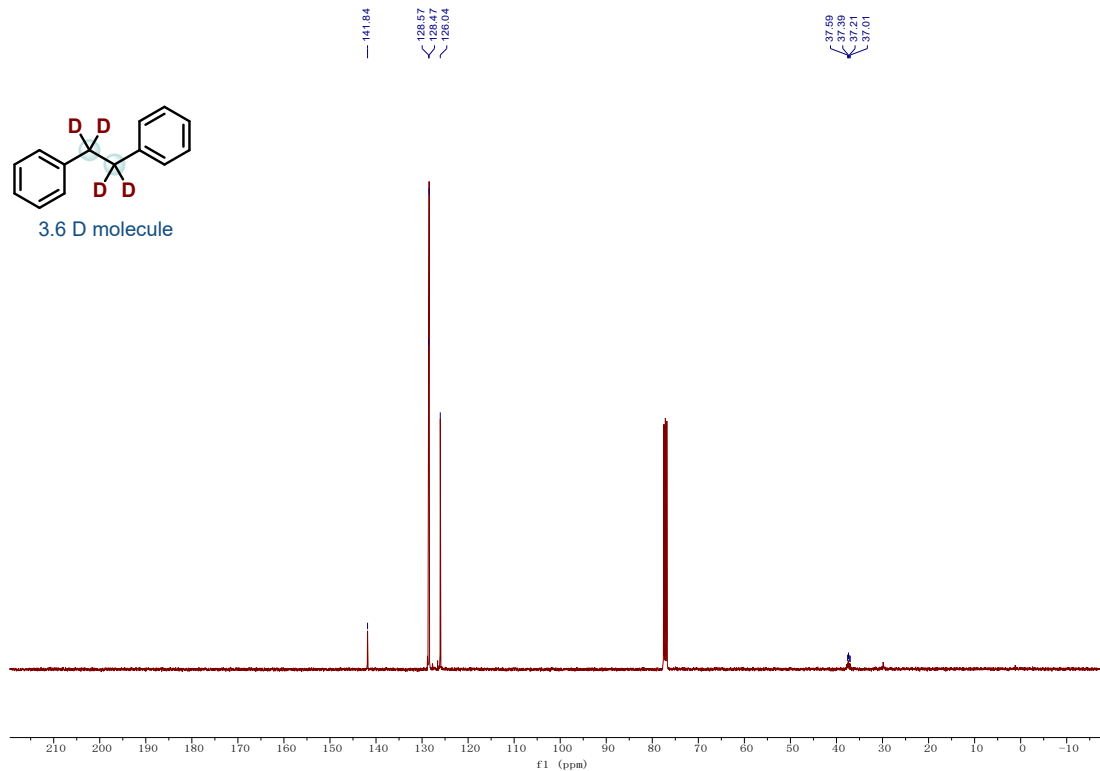

**<sup>1</sup>H NMR (400 MHz, CDCl<sub>3</sub>) spectrum of 3v**

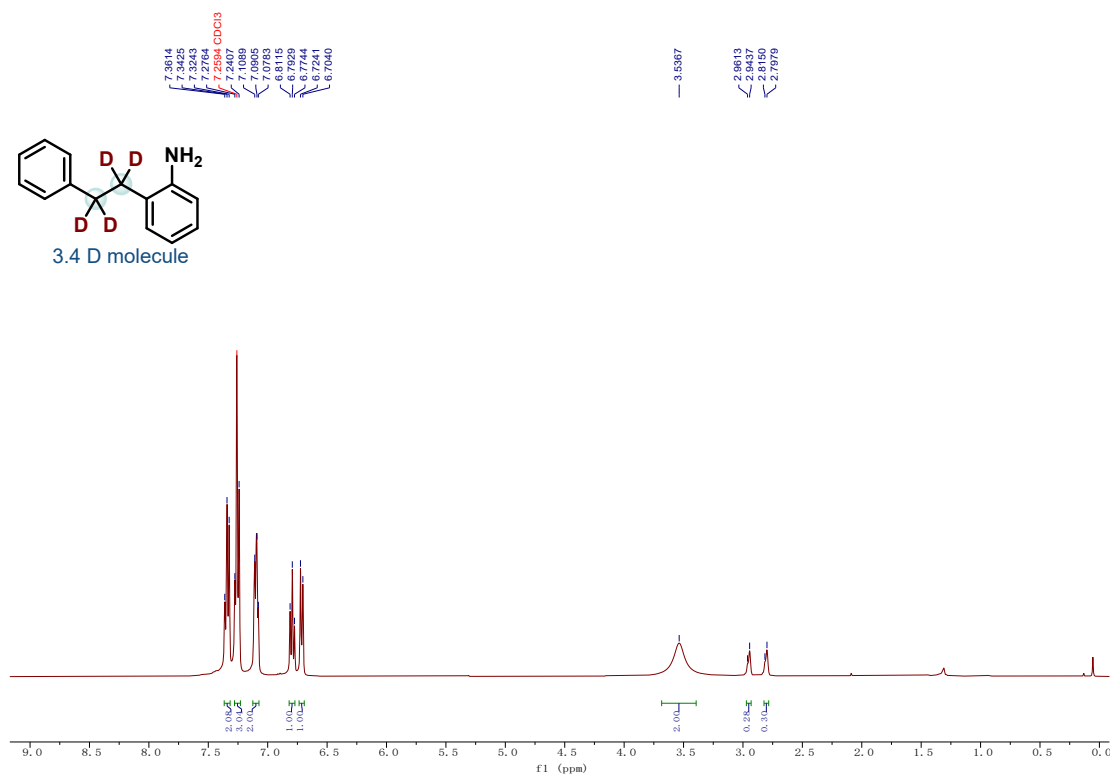

**<sup>13</sup>C NMR (101 MHz, CDCl<sub>3</sub>) spectrum of 3v**

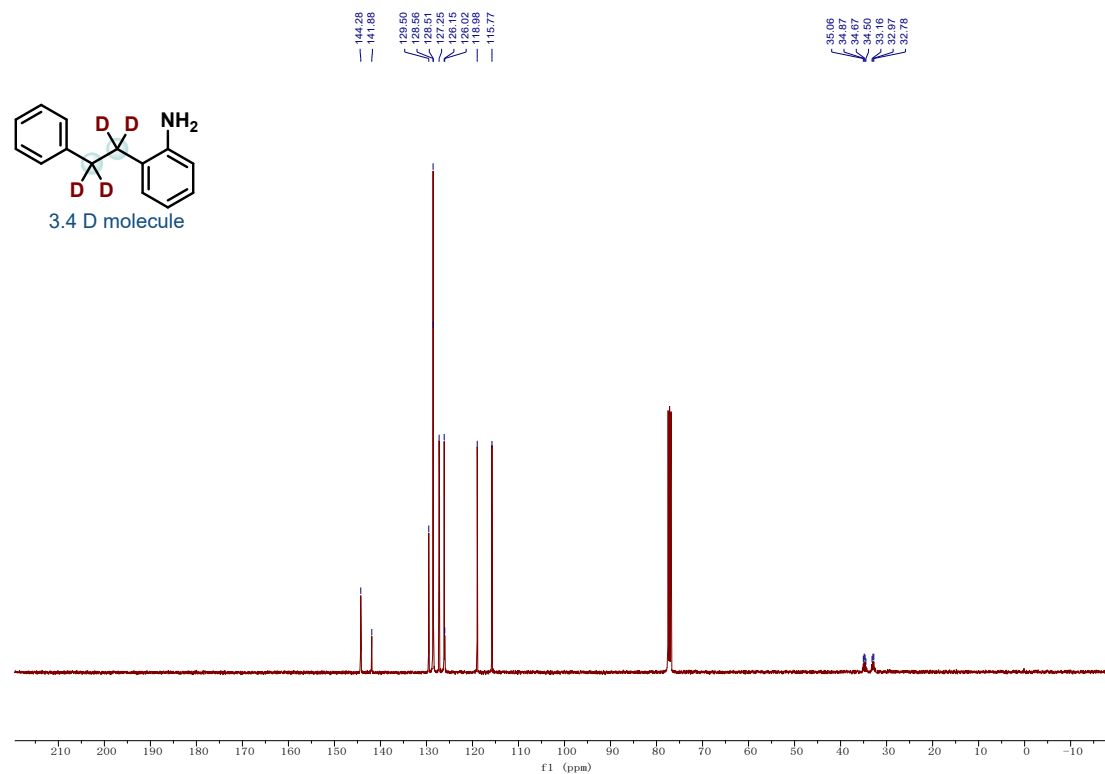

**<sup>1</sup>H NMR (400 MHz, CDCl<sub>3</sub>) spectrum of 3w**

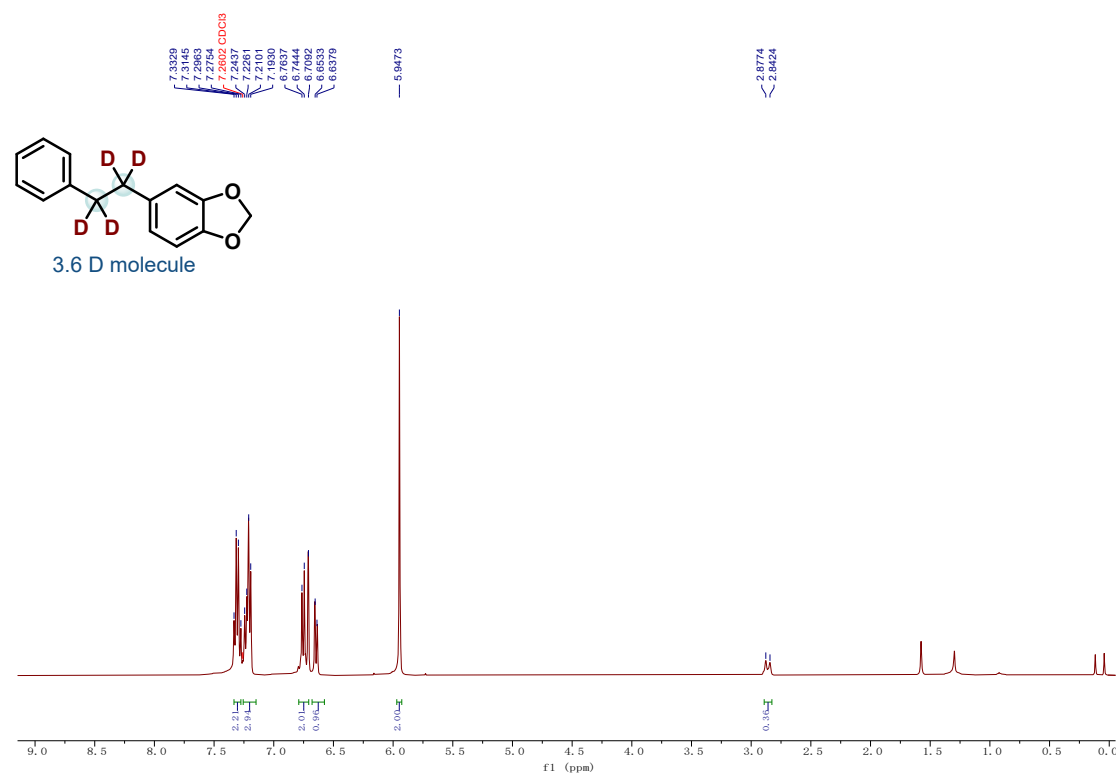

**<sup>13</sup>C NMR (101 MHz, CDCl<sub>3</sub>) spectrum of 3w**

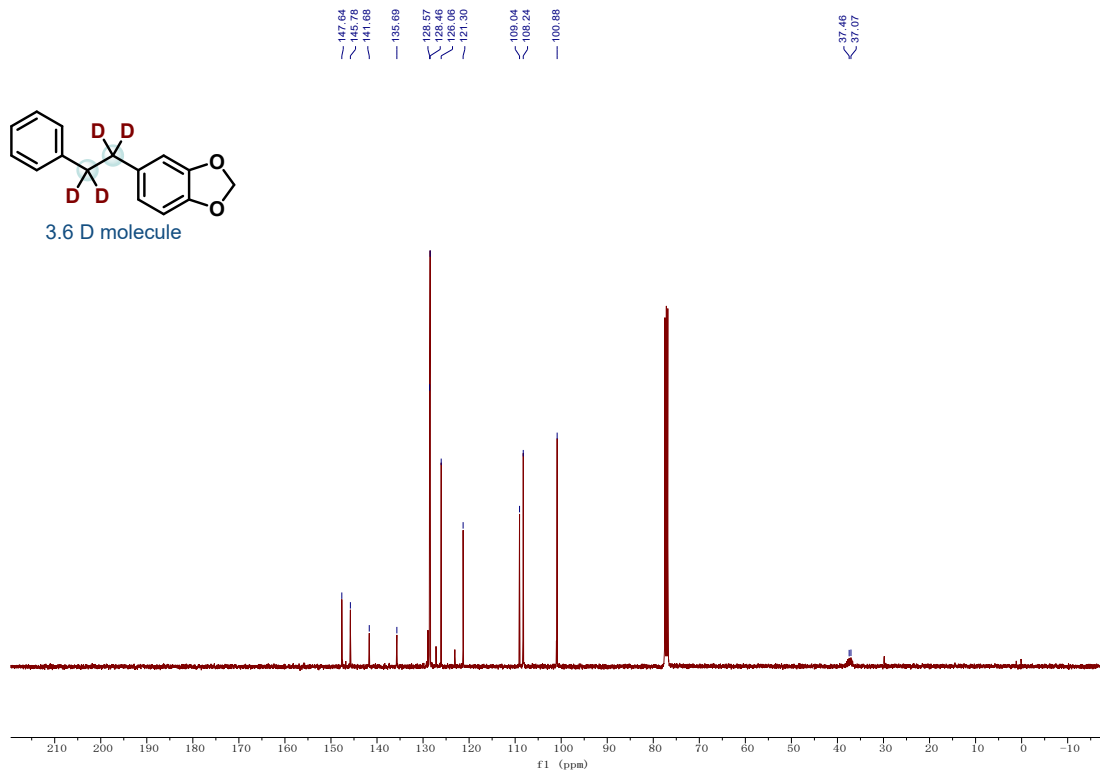

**<sup>1</sup>H NMR (400 MHz, CDCl<sub>3</sub>) spectrum of 3x**

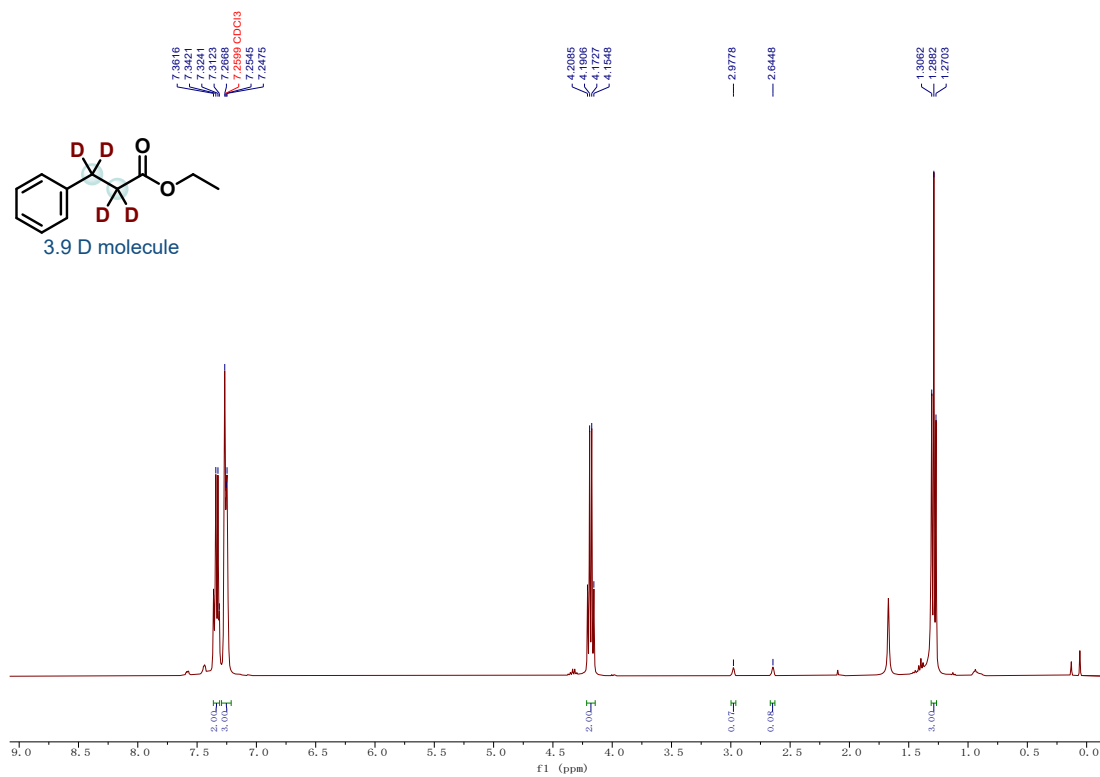

**$^{13}\text{C}$  NMR (101 MHz,  $\text{CDCl}_3$ ) spectrum of 3x**

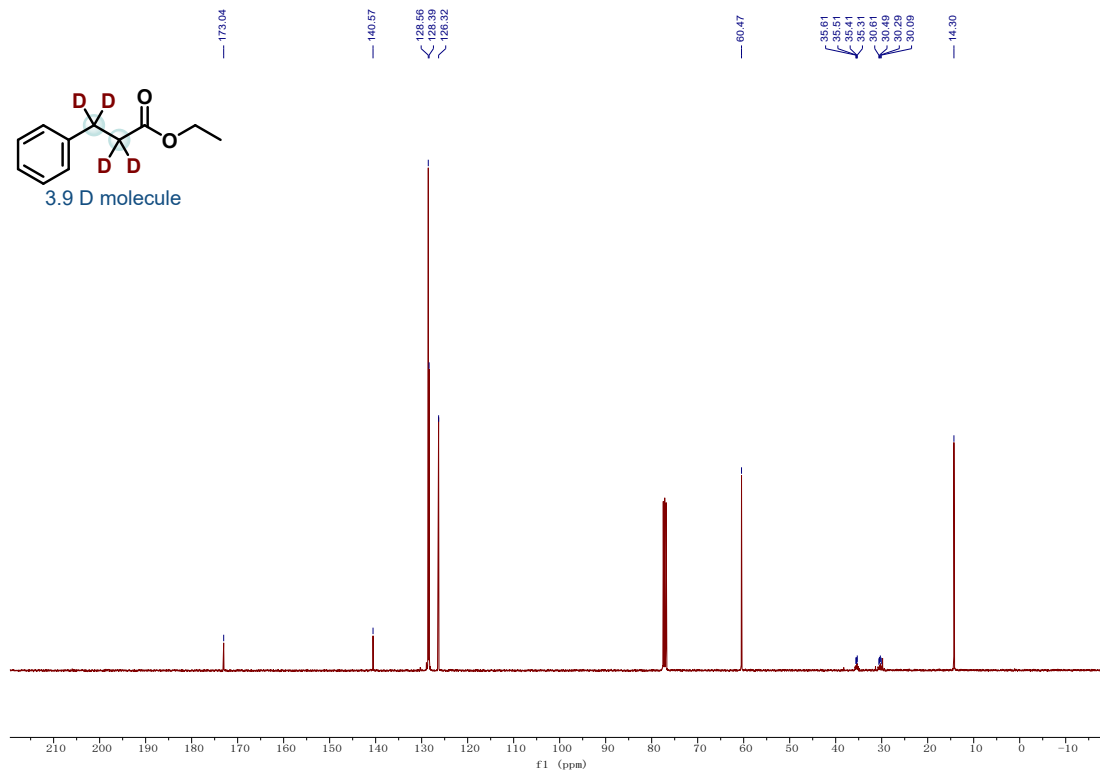

**$^1\text{H}$  NMR (400 MHz,  $\text{CDCl}_3$ ) spectrum of 3y**

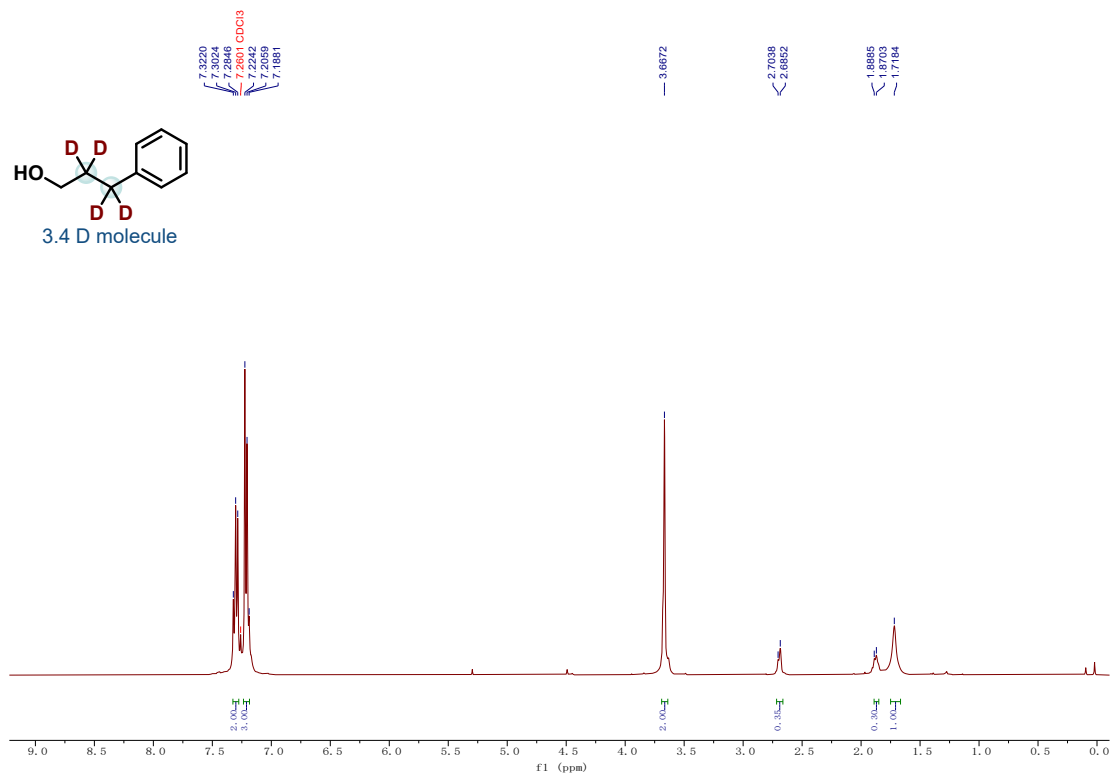

**<sup>13</sup>C NMR (101 MHz, CDCl<sub>3</sub>) spectrum of 3y**

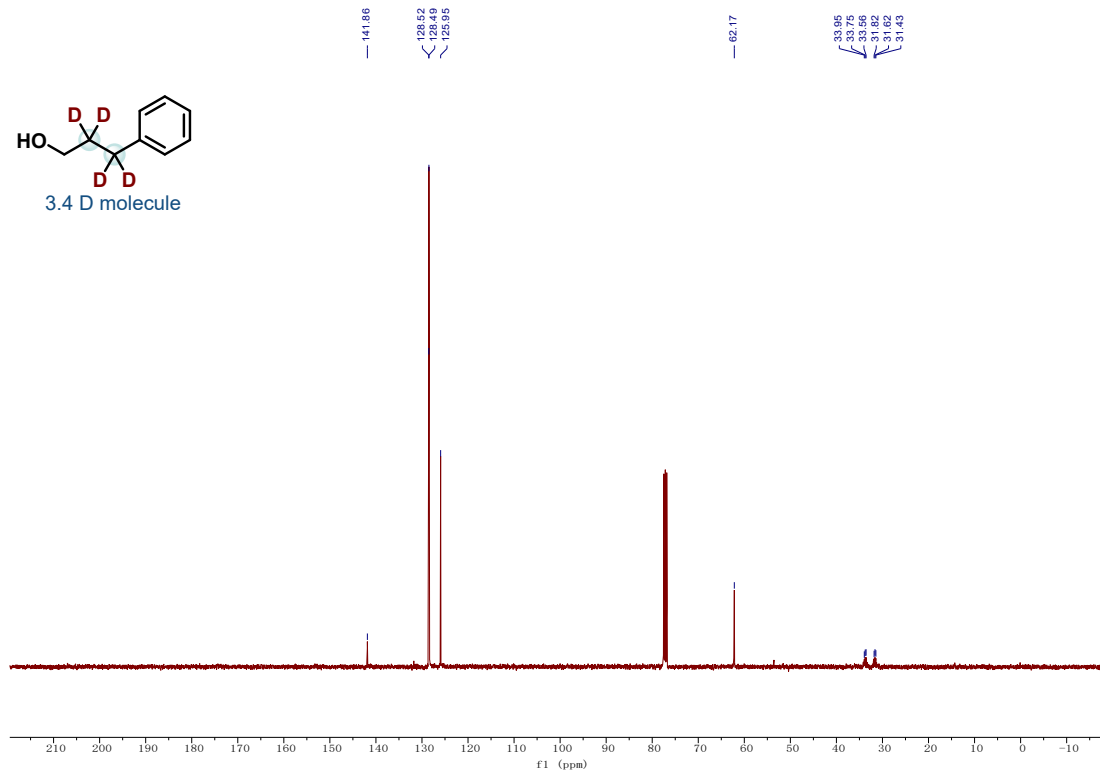

**<sup>1</sup>H NMR (400 MHz, CDCl<sub>3</sub>) spectrum of 3z**

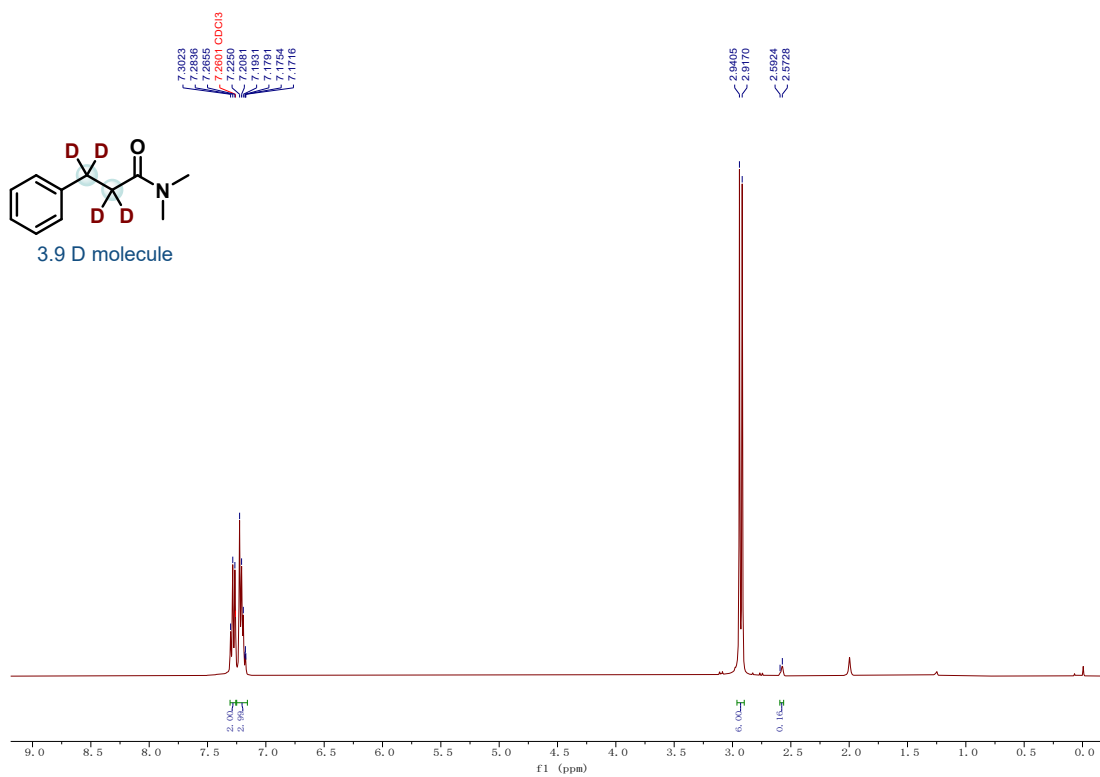

**$^{13}\text{C}$  NMR (101 MHz,  $\text{CDCl}_3$ ) spectrum of 3z**

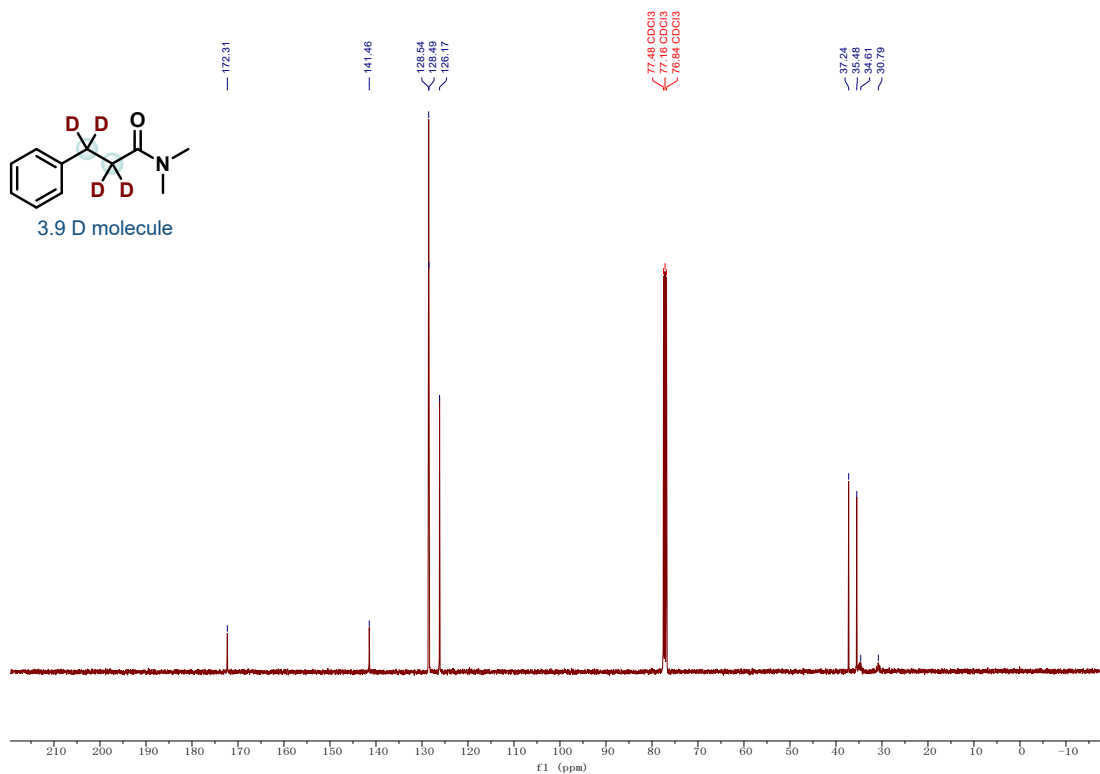

**$^1\text{H}$  NMR (400 MHz,  $\text{CDCl}_3$ ) spectrum of 3aa**

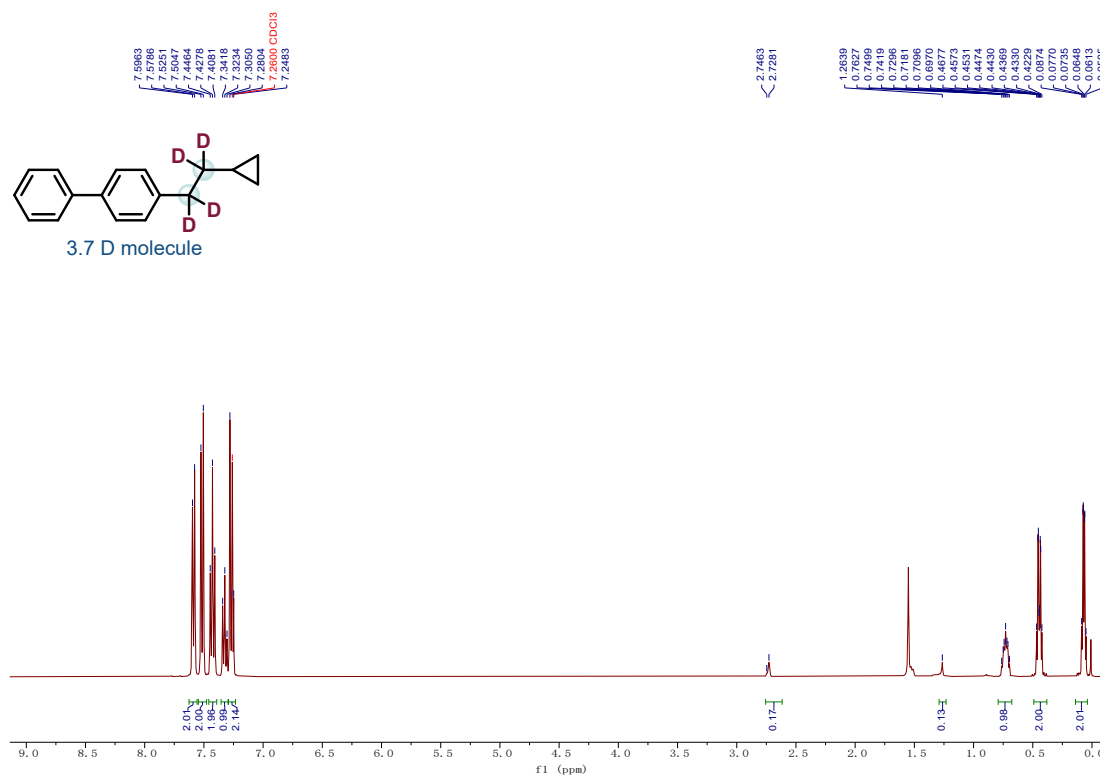

**<sup>13</sup>C NMR (101 MHz, CDCl<sub>3</sub>) spectrum of 3aa**

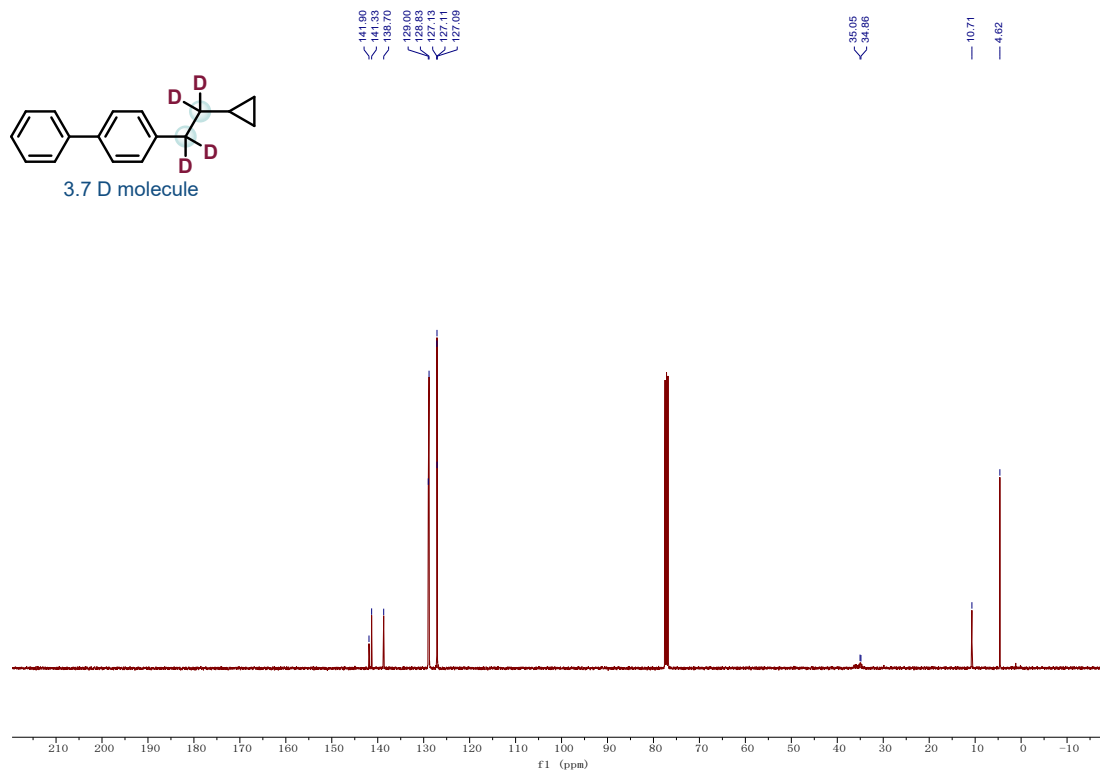

**<sup>1</sup>H NMR (400 MHz, CDCl<sub>3</sub>) spectrum of 3ac**

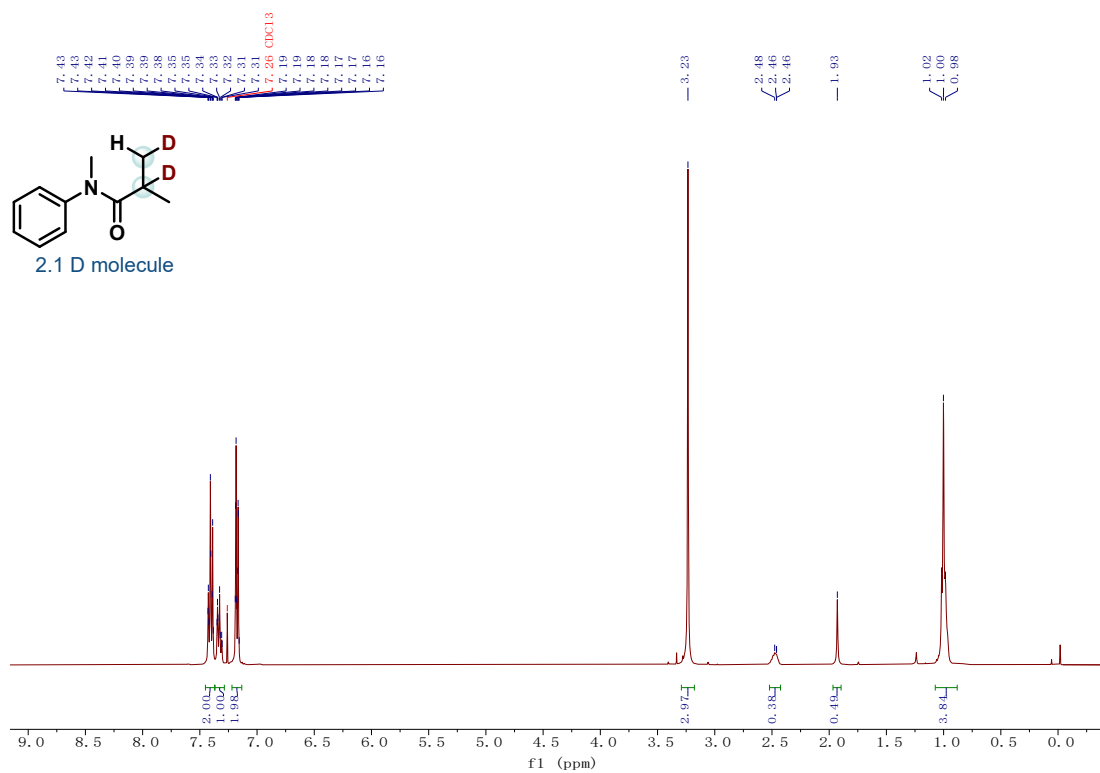

**<sup>13</sup>C NMR (101 MHz, CDCl<sub>3</sub>) spectrum of 3ac**

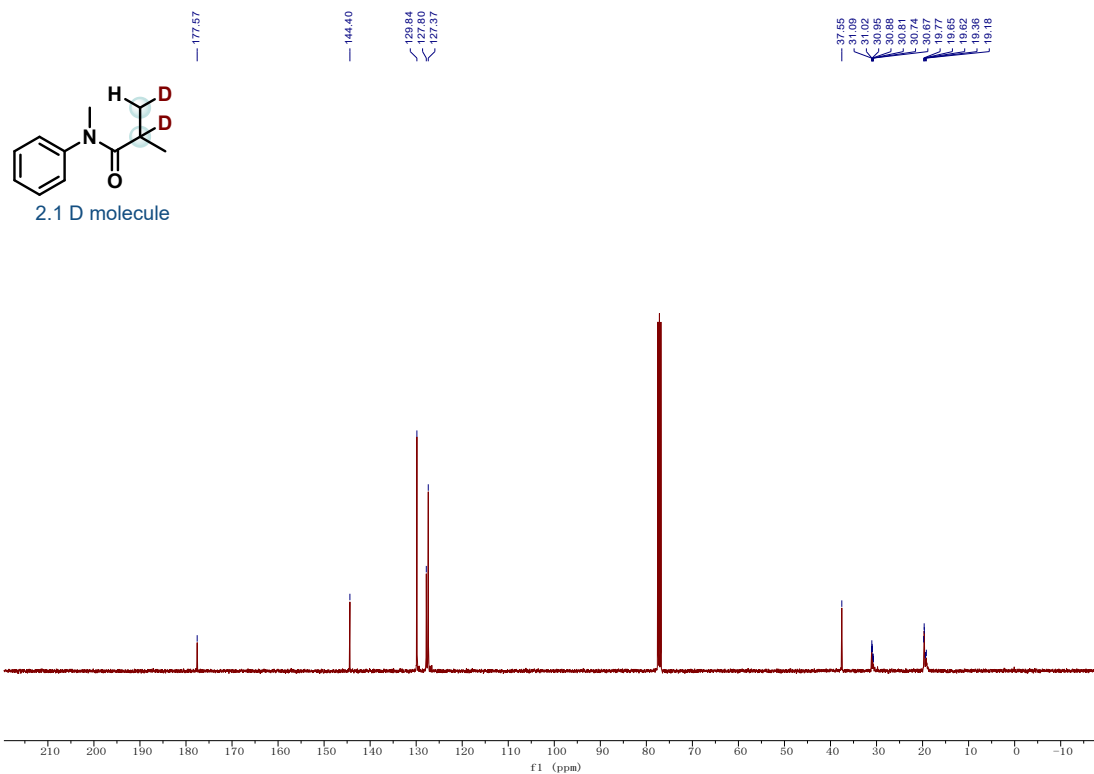

**<sup>1</sup>H NMR (400 MHz, CDCl<sub>3</sub>) spectrum of 3ad**

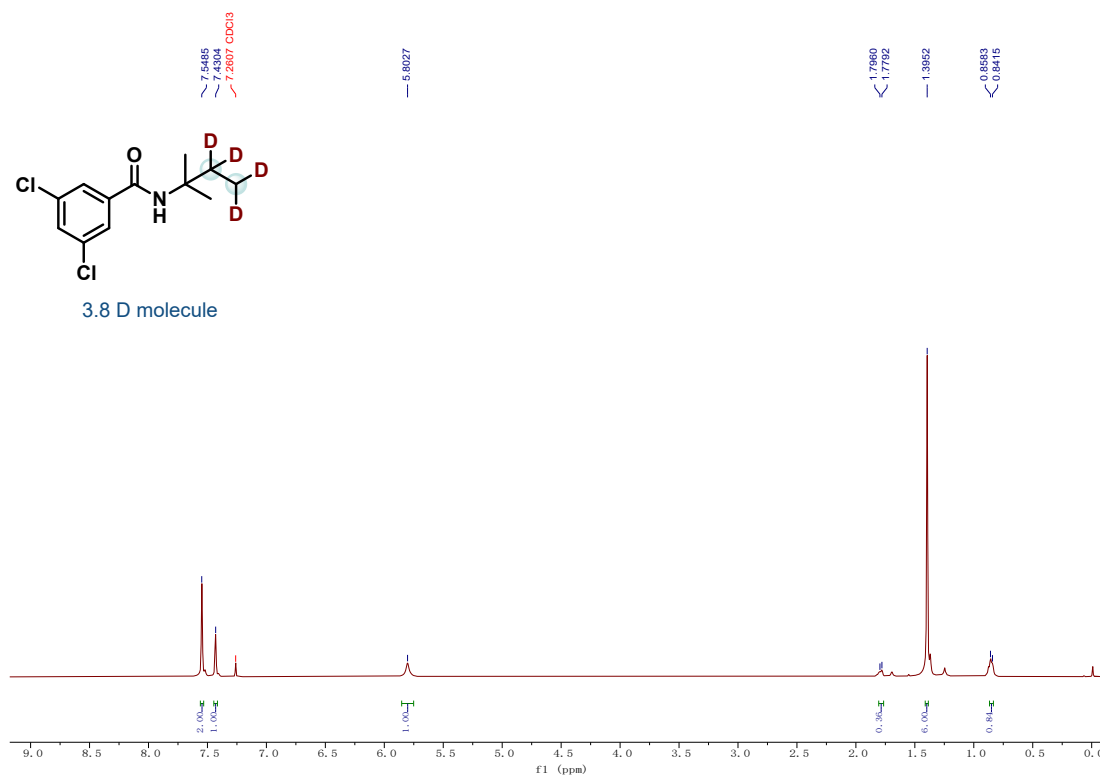

<sup>13</sup>C NMR (101 MHz, CDCl<sub>3</sub>) spectrum of 3ad

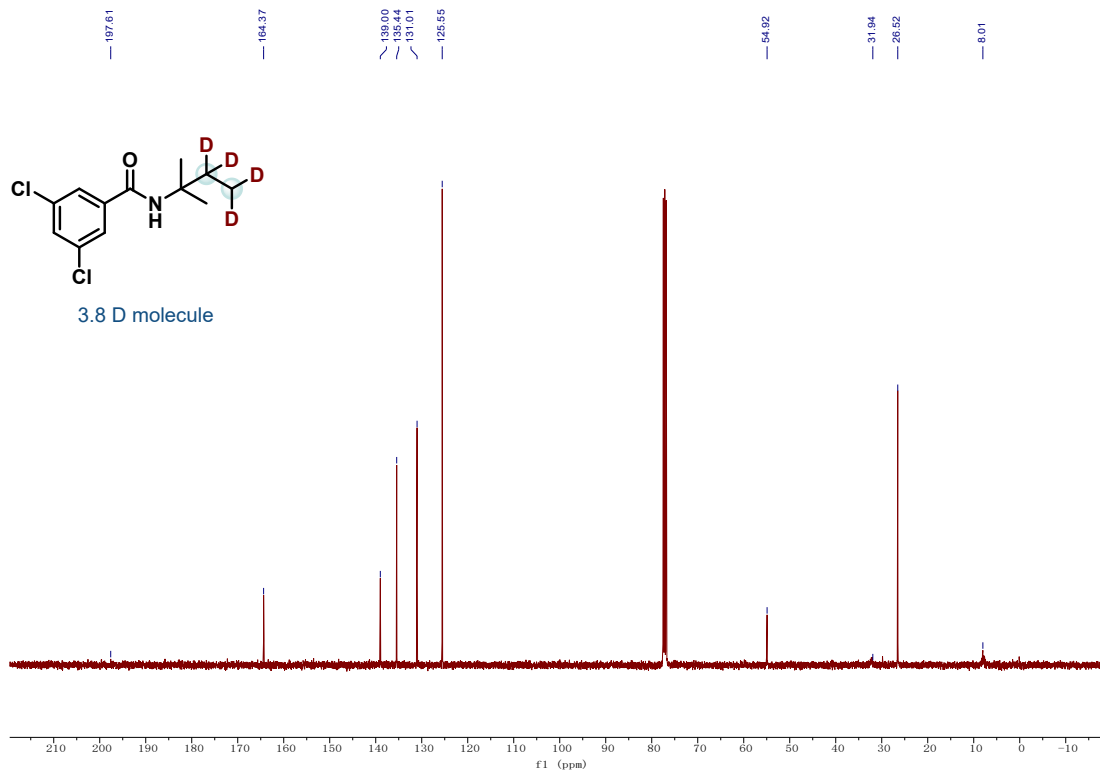

<sup>1</sup>H NMR (400 MHz, CDCl<sub>3</sub>) spectrum of 3ae

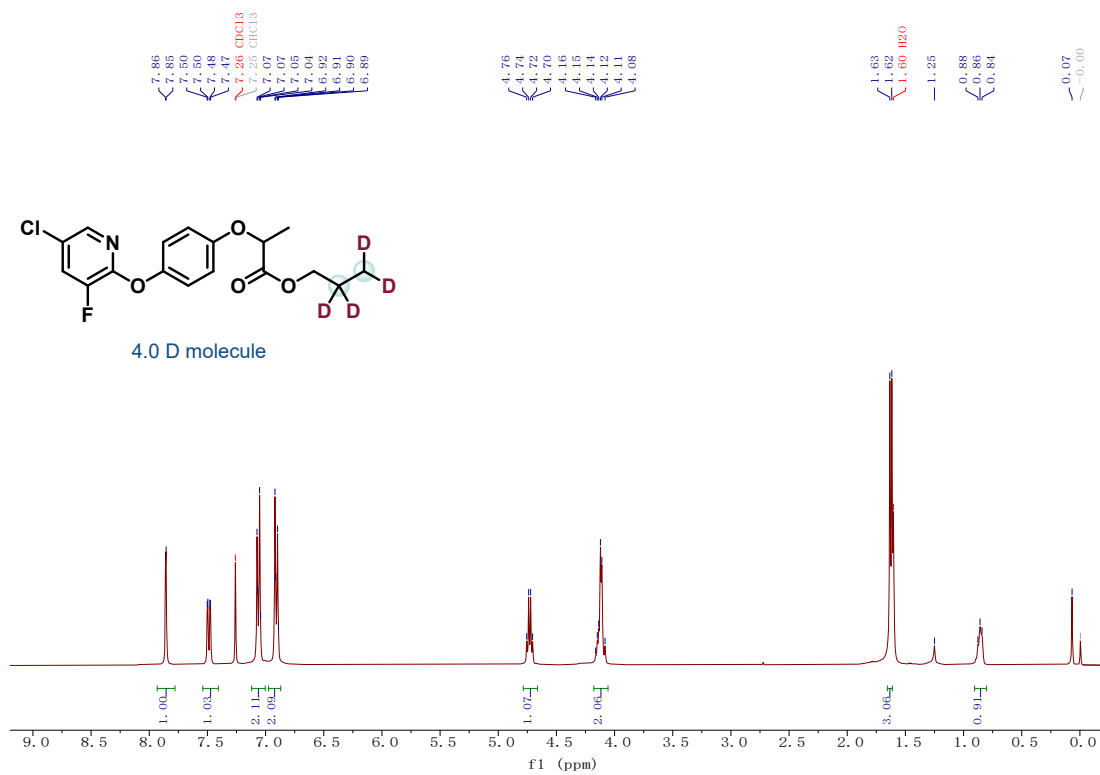

**<sup>19</sup>F NMR (376 MHz, CDCl<sub>3</sub>) spectrum of 3ae**

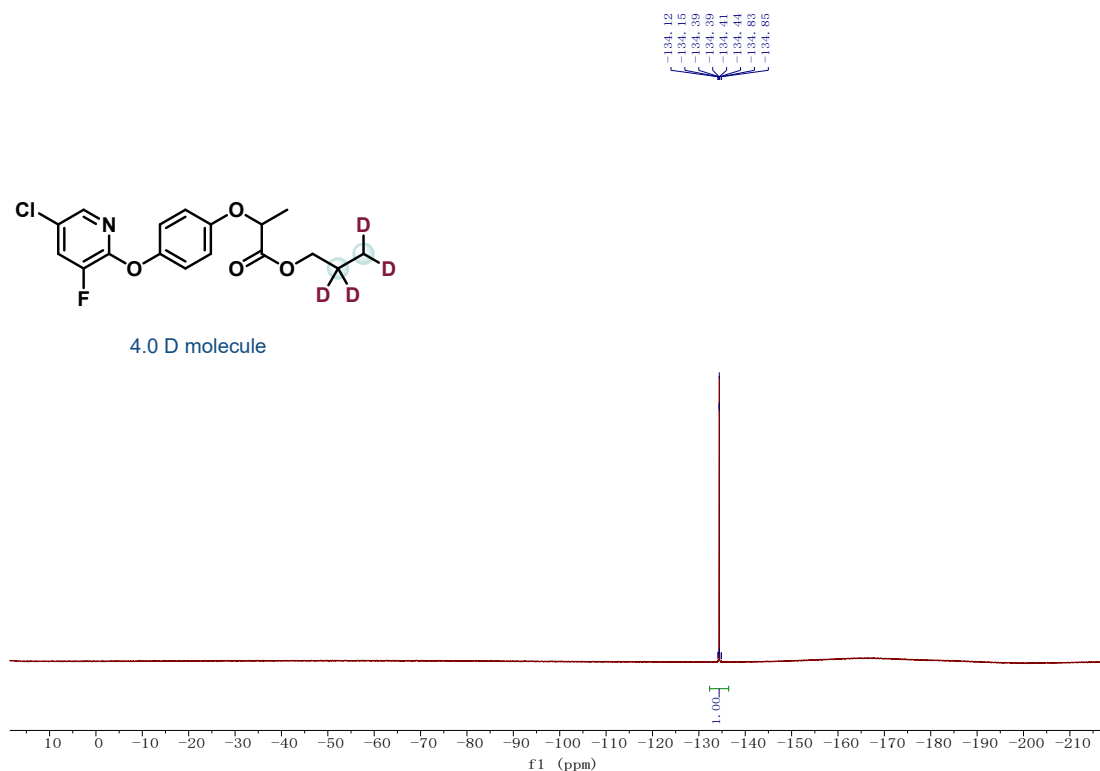

**<sup>13</sup>C NMR (101 MHz, CDCl<sub>3</sub>) spectrum of 3ae**

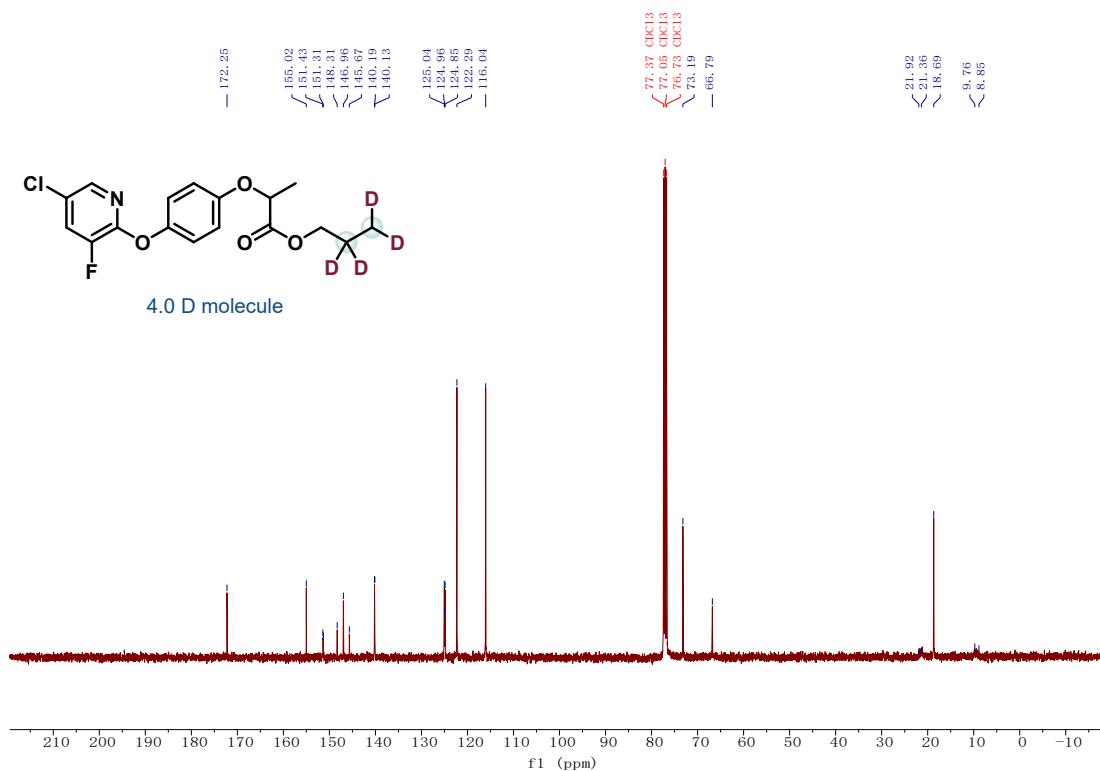

### <sup>1</sup>H NMR (400 MHz, CDCl<sub>3</sub>) spectrum of 3af

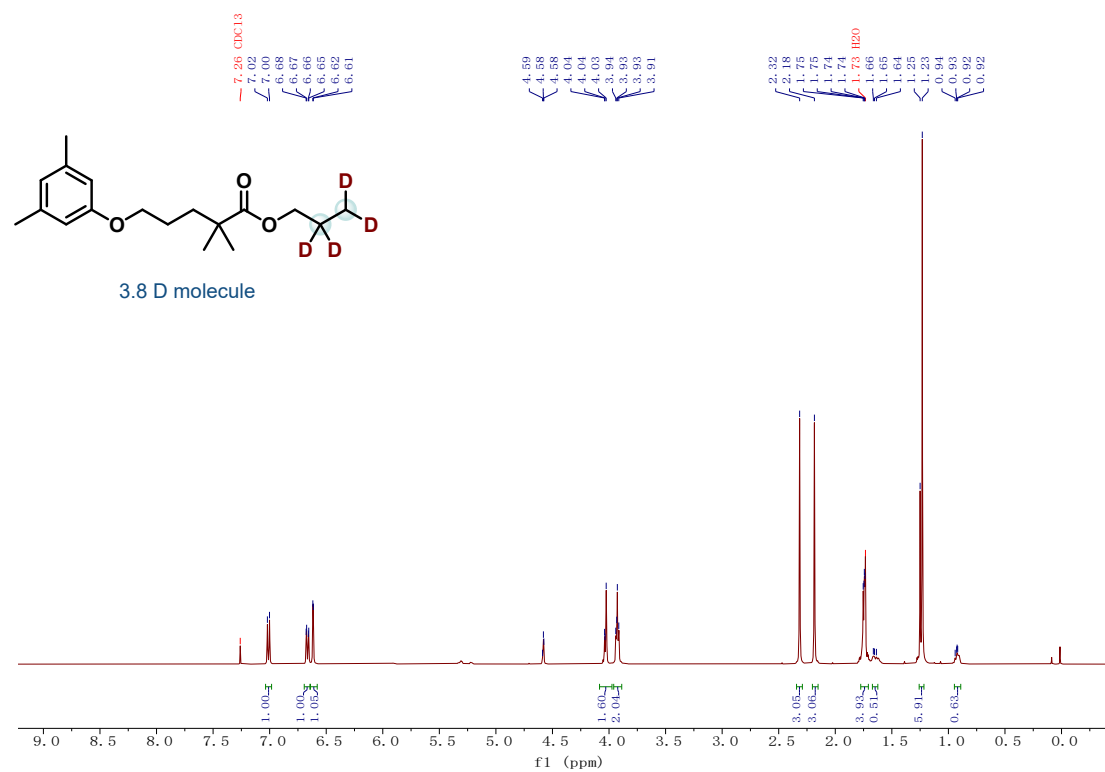

### <sup>13</sup>C NMR (101 MHz, CDCl<sub>3</sub>) spectrum of 3af

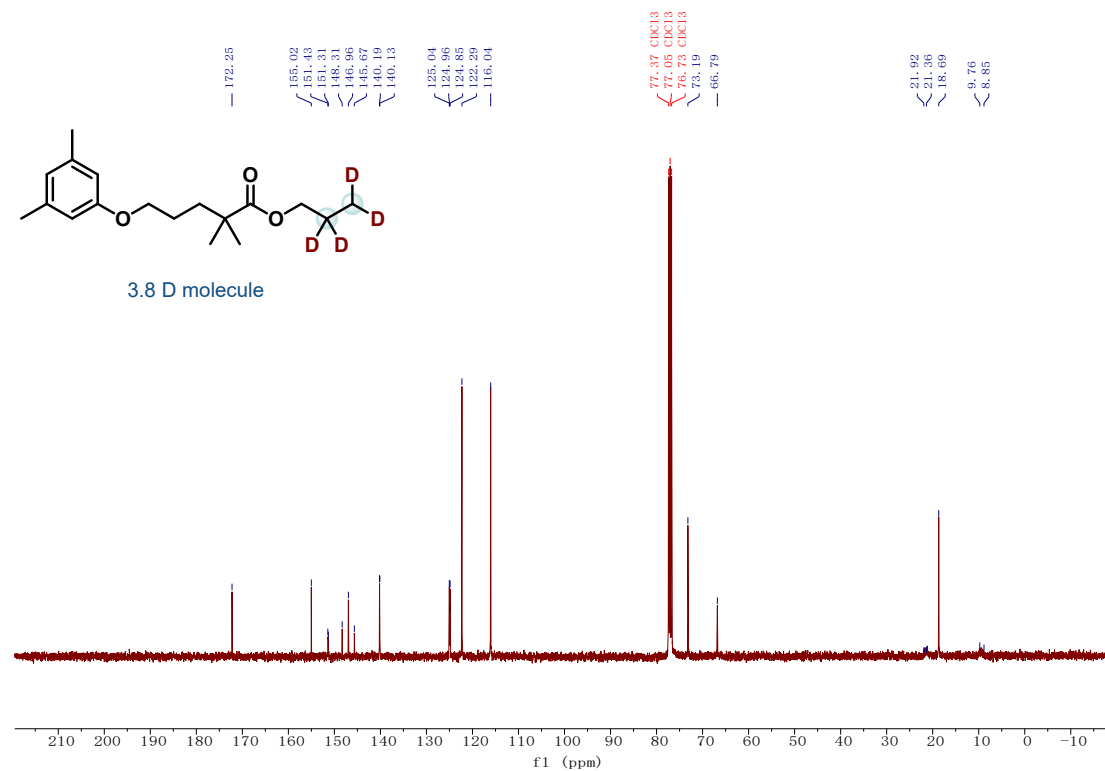

### <sup>1</sup>H NMR (400 MHz, CDCl<sub>3</sub>) spectrum of 3ah

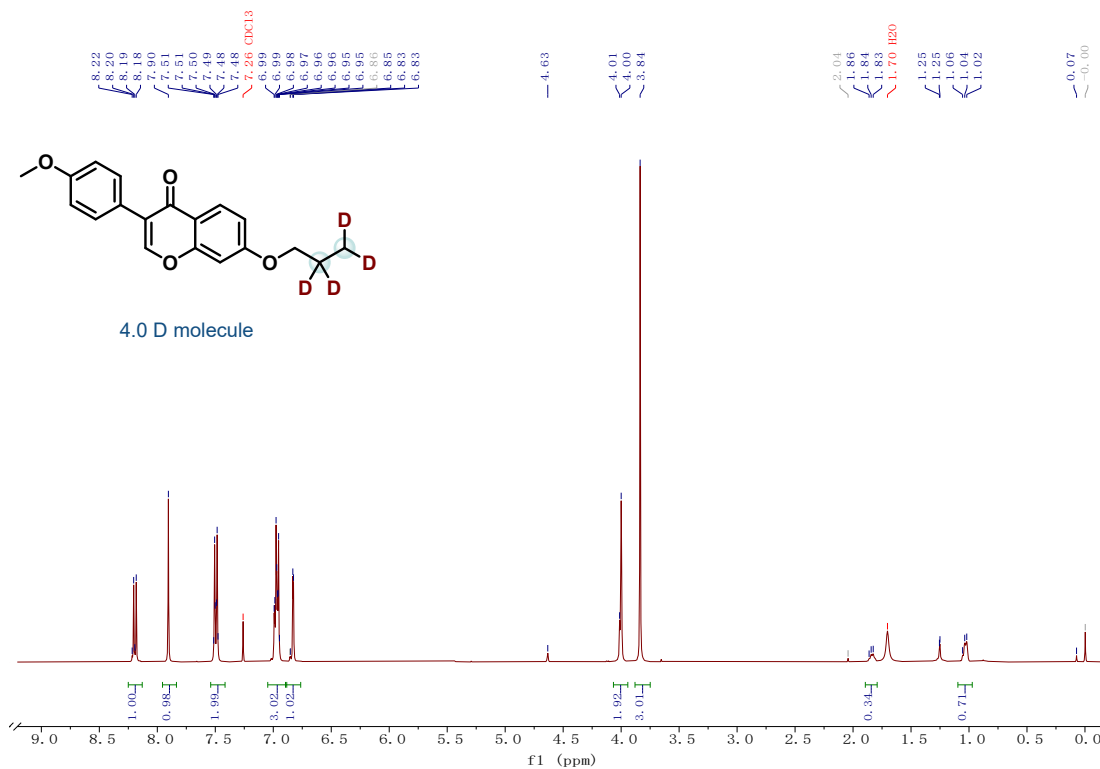

<sup>13</sup>C NMR (101 MHz, CDCl<sub>3</sub>) spectrum of 3ah

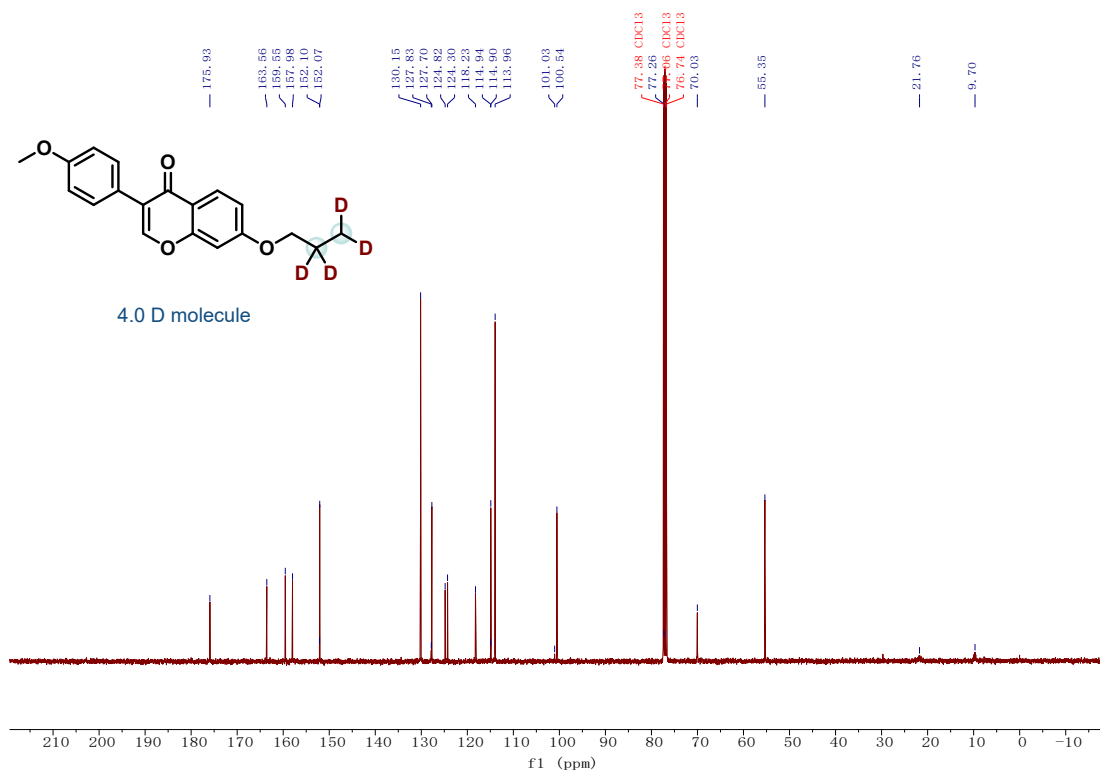

**<sup>1</sup>H NMR (400 MHz, CDCl<sub>3</sub>) spectrum of 3ai**

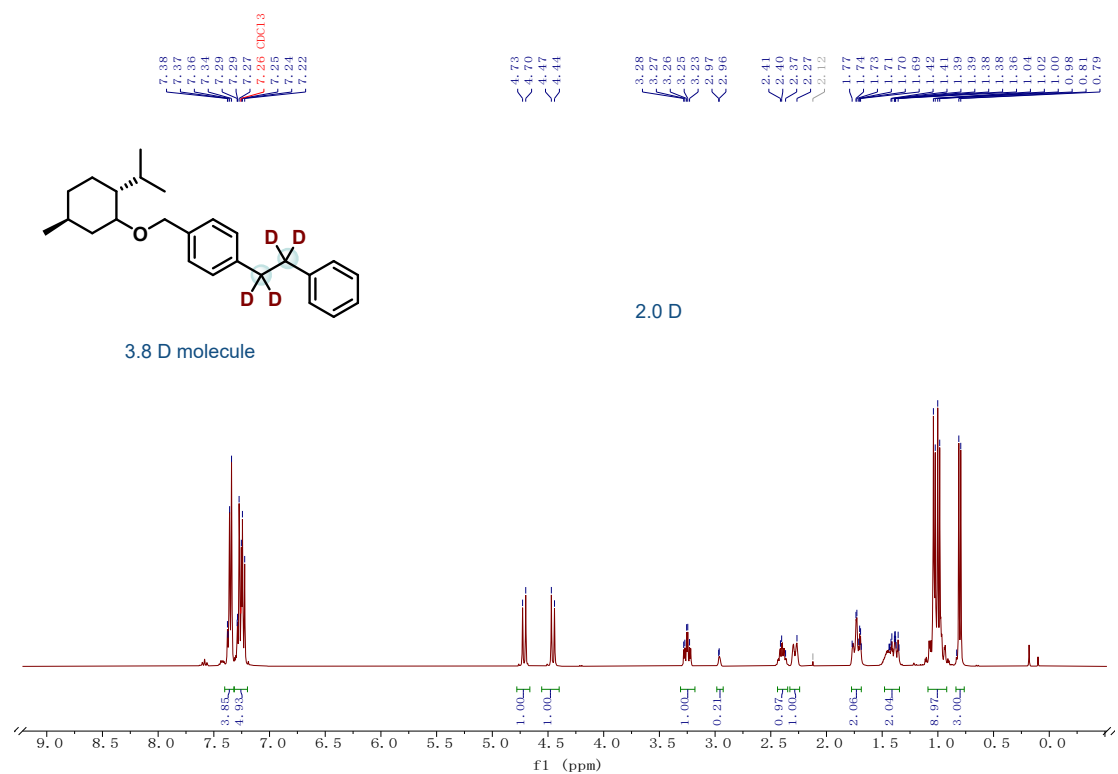

**<sup>13</sup>C NMR (101 MHz, CDCl<sub>3</sub>) spectrum of 3ai**

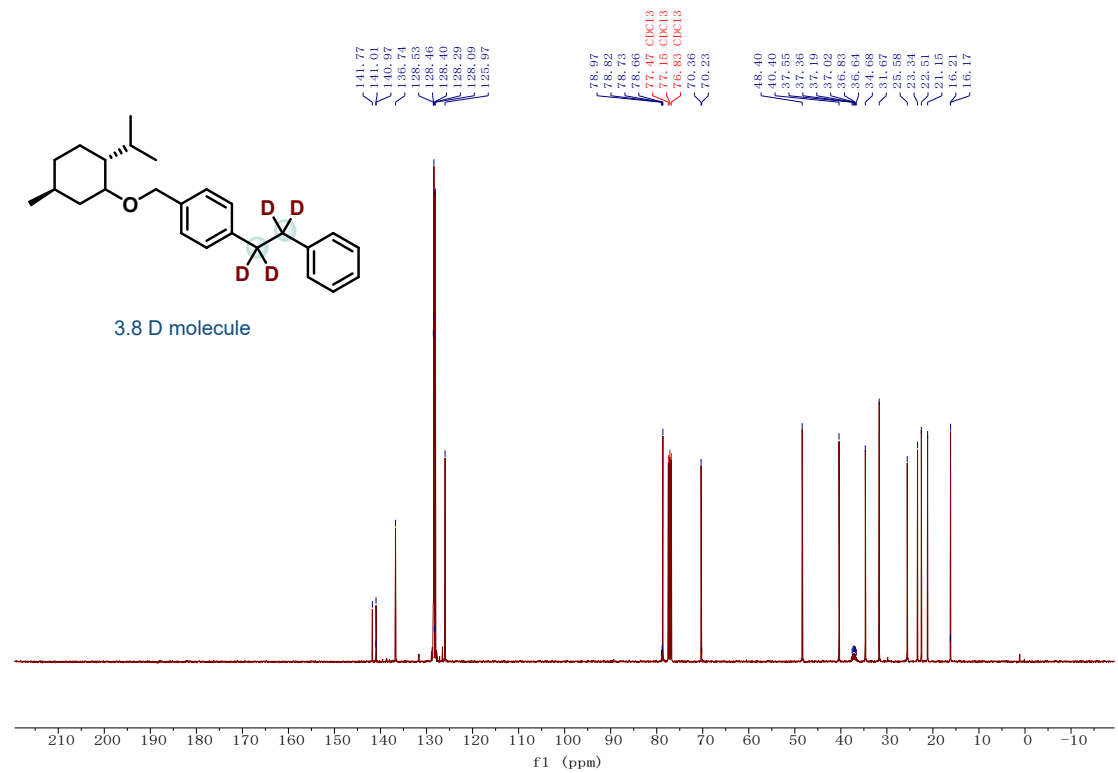

## References

- [1] a) S. E. Sloane, A. Reyes, Z. P. Vang, L. Z. Li, K. T. Behlow, J. R. Clark, *Org. Lett.*, 2020, **22**, 9139–9144. b) R. Kusy, M. Lindner, J. Wagner, K. Grela, *Chem. Catal.*, 2022, **2**, 1346–1361. c) N. Hao, T. Jiao, Z. Sun, A. Mishra, Q. D. Zhuo, M. Nishiura, Z. M. Hou, X. F. Cong, *J. Am. Chem. Soc.*, 2025, **147**, 6149–6161.
- [2] a) R. Sakamoto, H. Kinoshita, K. Miura, *Org. Lett.*, 2025, **27**, 5241–5246.
- [3] a) H. W. Shi, M. Rudolph, J. Li, Y. Tian, M. C. Dietl, H. Alshurafa, Y. W. Liu, W. Wang, H. Habeck, P. M. Stein, P. Krämer, F. Rominger, T. Oeser, N. Jiao, A. S. K. Hashmi, *Nat. Chem.*, 2025, **17**, 822–834.
- [4] a) Z. Jia, S. Z. Luo, *CCS Chem.*, 2023, **5**, 1069–1076. b) F. Bu, Y. Q. Deng, L. Y. Lu, Y. Li, W. X. Song, Z. L. Yang, X. Luo, X. Dong, R. J. Yi, D. L. Yang, S. C. Wang, A. W. Lei, W. Li, *J. Am. Chem. Soc.*, 2025, **147**, 5785–5795.
- [5] a) R. Poli, *CR. Chim.*, 2021, **24**, 147–175. b) C. S. Zhang, B. B. Zhang, L. Zhong, X. Y. Chen, Z. X. Wang, *Chem. Sci.*, 2022, **13**, 3728–3739. c) O. Gutierrez, J. C. Tellis, D. N. Primer, G. A. Molander, M. C. Kozlowski, *J. Am. Chem. Soc.*, 2015, **137**, 4896–4899.
- [6] a) C. Zhou, R. Wang, L. Gao, X. Huang, X. Zhang, *ACS Appl. Mater. Interfaces.*, 2022, **14**, 30962–30968. b) W. T. Wei, M. B. Zhou, J. H. Fan, W. Liu, M. Hu, P. Xie, J. H. Li, *Angew. Chem. Int. Ed.*, 2013, **52**, 3638–3641.
- [7] a) B. Du, Y. Ouyang, Q. Chen, W. Y. Yu, *J. Am. Chem. Soc.* 2021, **143**, 14962–14968. b) Y. L. He, M. Börjesson, H. Y. Song, Y. H. Xue, D. Zeng, R. Martin, S. L. Zhu, *J. Am. Chem. Soc.*, 2021, **143**, 20064–20070.
- [8] a) D. J. Bellis, H. Petersen, J. Ternieden, N. Pfänder, C. Weidenthaler, F. Schüth, *Angew. Chem. Int. Ed.*, 2022, **61**, e202208016. (b) F. Studt, F. Abild-Pedersen, T. Bligaard, R. Z. Sørensens, C. H. Christensen, J. K. Nørskov, *Science*. 2008, **320**, 1320–1322.
- [9] G. L. Shen, H. J. Liu, J. C. Chen, Z. X. He, Y. Y. Zhou, L. Wang, Y. Luo, Z. M. Su, B. M. Fan, *Org. Biomol. Chem.*, 2021, **19**, 3601–3610.
- [10] Y. M. Wu, C. B. Liu, C. H. Wang, S. Y. Lu, B. Zhang, *Angew. Chem. Int. Ed.*, 2020, **59**, 21170–21175.
- [11] W. J. Feng, Z. Chang, X. Lu, Y. Fu, *Nat. Commun.*, 2025, **16**, 2390.
- [12] a) A. Kurimoto, R. S. Sherbo, Y. Cao, N. W. X. Loo, C. P. Berlinguette, *Nat. Catal.*, 2020, **9**, 719–726. b) Y. L. Wang, Z. D. Huang, X. B. Leng, H. P. Zhu, G. X. Liu, Z. Huang, *J. Am. Chem. Soc.*, 2018, **140**, 4417–4429.
- [13] X. Liu, R. Y. Liu, J. X. Qiu, X. Cheng, G. G. Li, *Angew. Chem. Int. Ed.*, 2020, **59**, 13962–13967.
- [14] M. Subaramaniana, G. Sivakumara, V. G. Landgea, R. Kumara, K. Natteb, R. V. Jagadeeshc, E. Balaramana, *J. Catal.*, 2023, **425**, 386–405.
